# Supplementary material for: Identification of species-specific peptide markers in cold-pressed oils
Source: Sci Rep. 2020 Nov 17;10:19971. doi: 10.1038/s41598-020-76944-z (PMC7672054; doi:10.1038/s41598-020-76944-z)
Supplement: Supplementary file 1 — Supplementary Information. [file 41598_2020_76944_MOESM1_ESM.xlsx]

## Sheet: Title page
Identification of species-specific peptide markers in cold-pressed oils
Klaudia Kotecka-Majchrzak1, Agata Sumara2, Emilia Fornal2, and Magdalena Montowska1,*
1Department of Meat Technology, Poznan University of Life Sciences, Wojska Polskiego 31, Poznan 60-624, Poland
2Department of Pathophysiology, Medical University of Lublin, Jaczewskiego 8b, Lublin 20-090, Poland
*email: magdalena.montowska@gmail.com, magdalena.montowska@up.poznan.pl

## Sheet: Coconut oil
numSpectraProteinObserved	species	numSpeciesPresentR1	numPepsUniqueSpecies1	numSpectraSpecies1	totalIntensitySpecies1	accession_number	accession_numbers	coverage_map	coverage_maps	percentCoverage	percentCoverages	numPepsUnique	scoreUnique	scoresUnique	groupNum	subgroupNum	entry_name
57	Cocos nucifera	1	12	57	247000000	AYJ72172.1	AYJ72172.1|AFI57843.1	0+23+28+34+27+19+36+5+27+6+15+19+14+11+10+2+20+18+14+12	0+23+28+34+27+19+36+5+27+6+15+19+14+11+10+2+20+18+14+12|0+43+25+81+8+6+15+19+14+71	56.1	56.1|21.9	12	237.46	237.46|67.71	1	1.1	glyceraldehyde-3-phosphate dehydrogenase
42	Cocos nucifera	1	14	42	172000000	AKS26849.1	AKS26849.1	0+60+17+14+12+8+19+86+29+46+9+11+13+35+47+18+12+30	0+60+17+14+12+8+19+86+29+46+9+11+13+35+47+18+12+30	33.9	33.9	14	234.02	234.02	2	2.1	11S globulin isoform 2
37	Cocos nucifera	2	13	37	143000000	ASQ40963.1	ASQ40963.1|pdb|5WPW|A|pdb|5WPW|B|sp|A0A222NNM9.1|COS1_COCNU|AKS26848.1|pdb|5XTY|A|pdb|5XTY|B	0+60+17+14+12+8+19+83+29+49+9+11+13+35+47+18+12+30	0+60+17+14+12+8+19+83+29+49+9+11+13+35+47+18+12+30|0+18+17+14+12+8+19+83+29+49+9+11+13+35+47+18+12+30|0+18+17+14+12+8+19+83+29+49+9+11+13+35+47+18+12+30|0+60+17+14+12+8+19+83+29+49+9+11+13+35+47+18+12+30|0+60+17+14+12+8+19+83+29+49+9+11+13+35+35+30+12+30|0+60+17+14+12+8+19+83+29+49+9+11+13+35+35+30+12+30|0+60+17+14+12+8+19+83+29+49+9+11+13+35+35+30+12+30	33.9	33.9|37.2|37.2|33.9|31.3|31.3|31.3	13	202.8	202.8|202.8|202.8|202.8|181.8|181.8|181.8	2	2.2	cocosin
2	Cocos nucifera	1	2	2	1470000	AYJ72170.1	AYJ72170.1	0+235+19+193	0+235+19+193	4.2	4.2	2	27.95	27.95	3	3.1	elongation factor 1-alpha
4	Cocos nucifera	1	1	4	4840000	ACH91013.1	ACH91013.1|AQT25674.1	0+44+11+21	0+44+11+21|0+92+11+21	14.4	14.4|8.8	1	16.77	16.77|16.77	4	4.1	oleosin isoform OLE500c, partial
2	Cocos nucifera	1	1	2	2920000	AQT25673.1	AQT25673.1	0+8+9+114	0+8+9+114	6.8	6.8	1	16.59	16.59	5	5.1	oleosin isoform 500a
1	Cocos nucifera	1	1	1	849000	CAM82973.1	CAM82973.1	0+80+18+176	0+80+18+176	6.5	6.5	1	11.46	11.46	6	6.1	actin, partial
3	Cocos nucifera	1	1	3	2050000	AZZ09171.1	AZZ09171.1	0+130+9+1	0+130+9+1	6.4	6.4	1	10.97	10.97	7	7.1	oleosin
2	Cocos nucifera	1	1	2	1020000	AMP82001.1	AMP82001.1|ARI45600.1	0+290+9+70	0+290+9+70|0+290+9+70	2.4	2.4|2.4	1	8.34	8.34|8.34	8	8.1	gibberellin 20-oxidase 1
1	Cocos nucifera	2	1	1	482000	AAC49119.1	AAC49119.1|prf||2204401A|sp|Q42670.1|PLSC_COCNU	0+249+9+50	0+249+9+50|0+249+9+50|0+249+9+50	2.9	2.9|2.9|2.9	1	7.14	7.14|7.14|7.14	9	9.1	lysophosphatidic acid acyltransferase
1	Cocos nucifera	2	1	1	1050000	AAK14705.1	AAK14705.1|AGS43473.1|AOX12900.1|YP_008578292.1|sp|Q7HHW4.1|ATPB_COCNU	0+167+11+320	0+167+11+320|0+167+11+320|0+167+11+320|0+167+11+320|0+167+11+320	2.2	2.2|2.2|2.2|2.2|2.2	1	7.12	7.12|7.12|7.12|7.12|7.12	10	10.1	ATP synthase beta subunit (chloroplast)
2	Cocos nucifera	1	1	2	1280000	AJG44304.1	AJG44304.1	0+58+8+170	0+58+8+170	3.3	3.3	1	7.02	7.02	11	11.1	NBS-LRR resistance protein RGC121, partial
2	Cocos nucifera	1	1	2	1960000	AGT55551.1	AGT55551.1	0+319+6+63	0+319+6+63	1.5	1.5	1	6.37	6.37	12	12.1	NBS-LRR type resistance protein, partial
1	Cocos nucifera	1	1	1	1450000	ALF95905.1	ALF95905.1	0+268+8+1797	0+268+8+1797	0.3	0.3	1	4.42	4.42	13	13.1	serine-threonine kinase STK9

## Sheet: Evening primrose
numSpectraProteinObserved	species	numSpeciesPresentR1	numPepsUniqueSpecies1	numSpectraSpecies1	totalIntensitySpecies1	accession_number	accession_numbers	coverage_map	coverage_maps	percentCoverage	percentCoverages	numPepsUnique	scoreUnique	scoresUnique	groupNum	subgroupNum	entry_name
1	Oenothera hartwegii	30	1	1	863000	AAO31550.1	AAO31550.1|AAO31551.1|AAO31552.1|AAO31553.1|AAO31554.1|ABW98687.1|ABW98855.1|ABX10020.1|ABX10104.1|AEK34306.1|AEK34308.1|AEK34309.1|AFX88410.1|AIA24624.1|AIA24625.1|AIA24626.1|AIA24627.1|AIA24628.1|AIS67760.1|AKG25256.1|AKG48933.1|AKG49099.1|ALR85982.1|ALR86066.1|ALR86150.1|ALR86234.1|ALR86318.1|ALR86402.1|ALR86486.1|ALR86570.1|ALR86654.1|AMC32001.1|AMC32006.1|ANC48951.1|ANC49035.1|ANG44290.1|ANI…	0+323+11+96	0+323+11+96|0+323+11+96|0+323+11+96|0+323+11+96|0+321+11+96|0+339+11+125|0+339+11+125|0+339+11+125|0+339+11+125|0+324+11+118|0+324+11+118|0+324+11+118|0+310+11+110|0+318+11+92|0+318+11+50|0+129+11+87|0+318+11+86|0+318+11+89|0+319+11+93|0+321+11+125|0+302+11+112|0+311+11+112|0+339+11+125|0+339+11+125|0+339+11+125|0+339+11+125|0+339+11+125|0+339+11+125|0+339+11+125|0+339+11+125|0+339+11+125|0+339+1…	2.5	2.5|2.5|2.5|2.5|2.5|2.3|2.3|2.3|2.3|2.4|2.4|2.4|2.5|2.6|2.9|4.8|2.6|2.6|2.6|2.4|2.5|2.5|2.3|2.3|2.3|2.3|2.3|2.3|2.3|2.3|2.3|2.3|2.3|2.3|2.3|2.3|2.3|2.3|2.3|2.3|2.3|2.3|2.3|2.3|2.3|2.3|2.3|2.6|2.3|2.8|2.8|2.3|4|2.3|2.3|2.3|2.3|2.3|2.3|2.3|2.3|2.3|2.3|2.3|2.3|2.3|2.3	1	15.2	15.2|15.2|15.2|15.2|15.2|15.2|15.2|15.2|15.2|15.2|15.2|15.2|15.2|15.2|15.2|15.2|15.2|15.2|15.2|15.2|15.2|15.2|15.2|15.2|15.2|15.2|15.2|15.2|15.2|15.2|15.2|15.2|15.2|15.2|15.2|15.2|15.2|15.2|15.2|15.2|15.2|15.2|15.2|15.2|15.2|15.2|15.2|15.2|15.2|15.2|15.2|15.2|15.2|15.2|15.2|15.2|15.2|15.2|15.2|15.2|15.2|15.2|15.2|15.2|15.2|15.2|15.2	1	1.1	ribulose-1,5-bisphosphate carboxylase/oxygenase large subunit, partial (chloroplast)
4	Oenothera argillicola	12	1	4	17800000	ABW98703.1	ABW98703.1|ABW98871.1|ABX10036.1|ABX10120.1|ALR85998.1|ALR86082.1|ALR86166.1|ALR86250.1|ALR86334.1|ALR86418.1|ALR86502.1|ALR86586.1|ALR86670.1|ANC48967.1|ANC49051.1|ANG44306.1|ANI86996.1|ANI87083.1|AOY34944.1|AOY35028.1|AOY35112.1|AOY35196.1|AOY35280.1|AOY35364.1|AOY35448.1|AOY35532.1|AOY35616.1|CAB67151.2|NP_084686.2|QBE85671.1|QBE85755.1|YP_001687136.1|YP_001687282.1|YP_001687366.1|YP_001687450…	0+447+19+606	0+447+19+606|0+447+19+606|0+447+19+606|0+447+19+606|0+447+19+606|0+447+19+606|0+447+19+606|0+447+19+606|0+447+19+606|0+447+19+606|0+447+19+606|0+447+19+606|0+447+19+606|0+447+19+606|0+447+19+606|0+447+19+606|0+449+19+606|0+449+19+606|0+447+19+606|0+447+19+606|0+447+19+606|0+447+19+606|0+447+19+606|0+447+19+606|0+447+19+606|0+447+19+606|0+447+19+606|0+447+19+606|0+447+19+606|0+447+19+606|0+447+19+…	1.7	1.7|1.7|1.7|1.7|1.7|1.7|1.7|1.7|1.7|1.7|1.7|1.7|1.7|1.7|1.7|1.7|1.7|1.7|1.7|1.7|1.7|1.7|1.7|1.7|1.7|1.7|1.7|1.7|1.7|1.7|1.7|1.7|1.7|1.7|1.7|1.7|1.7|1.7|1.7	1	3.7	3.7|3.7|3.7|3.7|3.7|3.7|3.7|3.7|3.7|3.7|3.7|3.7|3.7|3.7|3.7|3.7|3.7|3.7|3.7|3.7|3.7|3.7|3.7|3.7|3.7|3.7|3.7|3.7|3.7|3.7|3.7|3.7|3.7|3.7|3.7|3.7|3.7|3.7|3.7	2	2.1	RNA polymerase subunit beta (chloroplast)
1	Oenothera argillicola	10	1	1	3240000	ABW98704.1	ABW98704.1|ABW98872.1|ABX10037.1|ABX10121.1|ADT63282.1|ALR85999.1|ALR86083.1|ALR86167.1|ALR86251.1|ALR86335.1|ALR86419.1|ALR86503.1|ALR86587.1|ALR86671.1|ANC48968.1|ANC49052.1|ANG44307.1|AOY34945.1|AOY35029.1|AOY35113.1|AOY35197.1|AOY35281.1|AOY35365.1|AOY35449.1|AOY35533.1|AOY35617.1|CAB67152.2|NP_084687.2|QBE85672.1|QBE85756.1|YP_001687137.1|YP_001687283.1|YP_001687367.1|YP_001687451.1|YP_00922…	0+341+10+328	0+341+10+328|0+341+10+328|0+341+10+328|0+341+10+328|0+2+10+178|0+341+10+328|0+341+10+328|0+341+10+328|0+341+10+328|0+341+10+328|0+341+10+328|0+341+10+328|0+341+10+328|0+341+10+328|0+341+10+328|0+341+10+328|0+341+10+328|0+341+10+328|0+341+10+328|0+341+10+328|0+341+10+328|0+341+10+328|0+341+10+328|0+341+10+328|0+341+10+328|0+341+10+328|0+341+10+328|0+341+10+328|0+341+10+328|0+341+10+328|0+341+10+32…	1.4	1.4|1.4|1.4|1.4|5.2|1.4|1.4|1.4|1.4|1.4|1.4|1.4|1.4|1.4|1.4|1.4|1.4|1.4|1.4|1.4|1.4|1.4|1.4|1.4|1.4|1.4|1.4|1.4|1.4|1.4|1.4|1.4|1.4|1.4|1.4|1.4|1.4|1.4|1.4|1.4|1.4	1	3.51	3.51|3.51|3.51|3.51|3.51|3.51|3.51|3.51|3.51|3.51|3.51|3.51|3.51|3.51|3.51|3.51|3.51|3.51|3.51|3.51|3.51|3.51|3.51|3.51|3.51|3.51|3.51|3.51|3.51|3.51|3.51|3.51|3.51|3.51|3.51|3.51|3.51|3.51|3.51|3.51|3.51	3	3.1	RNA polymerase subunit beta' (chloroplast)
2	Oenothera speciosa	1	1	2	1950000	AML79398.1	AML79398.1	0+530+16+48	0+530+16+48	2.6	2.6	1	2.42	2.42	4	4.1	putative LOV domain-containing protein

## Sheet: Flax oil
numSpectraProteinObserved	species	numSpeciesPresentR1	numPepsUniqueSpecies1	numSpectraSpecies1	totalIntensitySpecies1	accession_number	accession_numbers	coverage_map	coverage_maps	percentCoverage	percentCoverages	numPepsUnique	scoreUnique	scoresUnique	groupNum	subgroupNum	entry_name
30	Linum usitatissimum	1	7	30	584000000	CAC94011.1	CAC94011.1	0+38+32+14+17+3+6+10+14+10+12+12	0+38+32+14+17+3+6+10+14+10+12+12	48.2	48.2	7	133.74	133.74	1	1.1	conlinin
16	Linum usitatissimum	1	6	16	22000000	CAV22173.1	CAV22173.1	0+48+22+44+11+87+25+7+25+78	0+48+22+44+11+87+25+7+25+78	23.9	23.9	6	102.45	102.45	2	2.1	unnamed protein product
28	Linum usitatissimum	1	5	28	128000000	CAC94010.1	CAC94010.1	0+38+33+14+26+10+14+34	0+38+33+14+26+10+14+34	43.1	43.1	5	101.34	101.34	3	3.1	conlinin
8	Linum usitatissimum	1	3	8	23300000	ABB01616.1	ABB01616.1|ABB01623.1	0+126+21+2+21+10	0+126+21+2+21+10|0+126+21+2+21+10	23.3	23.3|23.3	3	51.29	51.29|51.29	4	4.1	oleosin high molecular weight isoform
12	Linum usitatissimum	1	3	12	30800000	ABB01624.1	ABB01624.1	0+126+21+2+21+10	0+126+21+2+21+10	23.3	23.3	3	46.93	46.93	4	4.2	oleosin high molecular weight isoform
5	Linum usitatissimum	1	3	5	3450000	CBM38899.1	CBM38899.1|CBM39409.1	0+56+9+34+6+24+14+15	0+56+9+34+6+24+14+15|0+56+9+34+6+24+14+15	18.3	18.3|18.3	3	39.78	39.78|39.78	5	5.1	unnamed protein product
2	Linum usitatissimum	1	2	2	2110000	AAW34192.1	AAW34192.1|ABH11670.1|AFN53639.1|AMY26649.1	0+95+18+125+16+121	0+95+18+125+16+121|0+15+18+175|0+97+18+262|0+97+18+262	9	9|8.6|4.7|4.7	2	36.47	36.47|13.49|13.49|13.49	6	6.1	actin
11	Linum usitatissimum	1	3	11	23900000	CAF22093.1	CAF22093.1|ACS66683.1	0+88+15+19+14+11+10+29	0+88+15+19+14+11+10+29|0+103+15+79	20.9	20.9|7.6	3	34.76	34.76|9.12	7	7.1	glyceraldehyde 3-phosphate dehydrogenase, partial
3	Linum usitatissimum	1	2	3	1530000	CBL76244.1	CBL76244.1	0+46+10+4+8+38	0+46+10+4+8+38	16.9	16.9	2	33.59	33.59	8	8.1	unnamed protein product
2	Linum usitatissimum	2	2	2	10200000	AAA33401.1	AAA33401.1|sp|P69315.2|UBIQP_LINUS	0+247+18+40	0+247+18+40|0+247+18+40	5.9	5.9|5.9	2	24.62	24.62|24.62	9	9.1	ubiquitin, partial
7	Linum usitatissimum	1	2	7	27000000	ABB01620.1	ABB01620.1	0+102+12+13+15	0+102+12+13+15	19	19	2	24.57	24.57	10	10.1	oleosin low molecular weight isoform, partial
3	Linum usitatissimum	1	2	3	4190000	ABB01619.1	ABB01619.1	0+103+12+13+15	0+103+12+13+15	18.8	18.8	2	19.59	19.59	10	10.2	oleosin low molecular weight isoform, partial
3	UNREADABLE	1	2	3	2750000	pdb|1DWM|A	pdb|1DWM|A|sp|P82381.1|ICI_LINUS	0+8+9+35+18	0+8+9+35+18|0+7+9+35+18	38.5	38.5|39.1	2	22.29	22.29|22.29	11	11.1	Chain A, LINUM USITATISSINUM TRYPSIN INHIBITOR
2	Linum grandiflorum	1	1	2	2050000	BAL41455.1	BAL41455.1	0+15+14+320	0+15+14+320	4	4	1	17.64	17.64	12	12.1	fructose-bisphosphate aldolase 1, partial
1	Linum usitatissimum	1	1	1	1720000	CAL40952.1	CAL40952.1	0+66+17+8	0+66+17+8	18.6	18.6	1	16.72	16.72	13	13.1	unnamed protein product, partial
2	Linum usitatissimum	1	2	2	1580000	AMY26620.1	AMY26620.1|AFN53712.1	0+51+9+10+24	0+51+9+10+24|0+51+9+529	35.1	35.1|1.5	2	16.26	16.26|11.89	14	14.1	late embryogenesis abundant (lea) group 1-embryo development
2	Linum usitatissimum	1	1	2	742000	AFN53709.1	AFN53709.1|AMY26630.1	0+5+11+147	0+5+11+147|0+5+11+147	6.7	6.7|6.7	1	16.08	16.08|16.08	15	15.1	hypothetical protein
7	Linum usitatissimum	1	1	7	23900000	ABB01617.1	ABB01617.1|ABB01622.1	0+139+16	0+139+16|0+139+16	10.3	10.3|10.3	1	15.34	15.34|15.34	16	16.1	oleosin low molecular weight isoform
8	Linum usitatissimum	1	1	8	36600000	ABB01618.1	ABB01618.1|ABB01621.1	0+139+16	0+139+16|0+139+16	10.3	10.3|10.3	1	14.42	14.42|14.42	17	17.1	oleosin low molecular weight isoform
1	Linum usitatissimum	1	1	1	440000	CAW65362.1	CAW65362.1|CAW96680.1|CBC49218.1|CBC99404.1|CBD35151.1	0+171+9+152	0+171+9+152|0+171+9+152|0+171+9+152|0+171+9+152|0+171+9+152	2.7	2.7|2.7|2.7|2.7|2.7	1	11.6	11.6|11.6|11.6|11.6|11.6	18	18.1	unnamed protein product
2	Linum africanum	35	1	2	20800000	ACR07797.1	ACR07797.1|AHA37491.1|AAR29477.1|ADT78412.1|ACR07799.1|ACR07800.1|ACR07801.1|ADT78413.1|AEK34225.1|AKG25210.1|ACR07802.1|ACR07803.1|ADT78414.1|ACR07804.1|ACR07805.1|ACR07806.1|ADT78415.1|ACR07818.1|ACR07807.1|ACR07814.1|ADT78416.1|ACR07808.1|ADT78418.1|AFX88408.1|ACR07809.1|ACR07810.1|AKG49034.1|ADT78419.1|ACR07811.1|ADT78420.1|ADT78421.1|ACR07812.1|ADT78422.1|ACR07813.1|CAB00010.1|ADT78423.1|ACR…	0+421+10+44	0+421+10+44|0+386+10+42|0+412+10+29|0+402+10+19|0+421+10+44|0+414+10+42|0+416+10+44|0+402+10+15|0+406+10+37|0+414+10+45|0+421+10+44|0+421+10+44|0+402+10+19|0+414+10+42|0+421+10+44|0+421+10+44|0+402+10+19|0+421+10+44|0+421+10+44|0+421+10+44|0+402+10+4|0+421+10+44|0+402+10+19|0+420+10+29|0+418+10+44|0+403+10+44|0+400+10+31|0+400+10+14|0+421+10+44|0+402+10+19|0+402+10+12|0+421+10+44|0+402+10+19|0+42…	2.1	2.1|2.2|2.2|2.3|2.1|2.1|2.1|2.3|2.2|2.1|2.1|2.1|2.3|2.1|2.1|2.1|2.3|2.1|2.1|2.1|2.4|2.1|2.3|2.1|2.1|2.1|2.2|2.3|2.1|2.3|2.3|2.1|2.3|2.1|2.2|2.3|2.1|2.2|2.1|2.1|2.1|2.1|2.1|2.1|2.1|2.1|2.1|2.1|2.1|2.1	1	10.57	10.57|10.57|10.57|10.57|10.57|10.57|10.57|10.57|10.57|10.57|10.57|10.57|10.57|10.57|10.57|10.57|10.57|10.57|10.57|10.57|10.57|10.57|10.57|10.57|10.57|10.57|10.57|10.57|10.57|10.57|10.57|10.57|10.57|10.57|10.57|10.57|10.57|10.57|10.57|10.57|10.57|10.57|10.57|10.57|10.57|10.57|10.57|10.57|10.57|10.57	19	19.1	ribulose-1,5-bisphosphate carboxylase/oxygenase large subunit (chloroplast)
2	Linum usitatissimum	1	1	2	2530000	AGD95011.1	AGD95011.1	0+34+6+328	0+34+6+328	1.6	1.6	1	10.44	10.44	20	20.1	malonyl-CoA:Acyl carrier protein transacylase
2	Linum usitatissimum	1	1	2	503000	CAH23406.1	CAH23406.1	0+90+7+45	0+90+7+45	4.9	4.9	1	10.04	10.04	21	21.1	unnamed protein product, partial
1	Linum usitatissimum	1	1	1	327000	ACS91452.1	ACS91452.1|ACS91453.1	0+720+9+672	0+720+9+672|0+713+9+571	0.6	0.6|0.6	1	9.67	9.67|9.67	22	22.1	M1
1	Linum usitatissimum	1	1	1	1960000	AFN53649.1	AFN53649.1|AMY26651.1	0+23+9+142	0+23+9+142|0+23+9+220	5.1	5.1|3.5	1	9.18	9.18|9.18	23	23.1	putative seed maturation protein
2	Linum usitatissimum	1	1	2	717000	AIU47282.1	AIU47282.1	0+335+6+376	0+335+6+376	0.8	0.8	1	7.26	7.26	24	24.1	amaranthin-like lectin
1	Linum usitatissimum	1	1	1	669000	AFN53666.1	AFN53666.1	0+248+6+596	0+248+6+596	0.7	0.7	1	7.01	7.01	25	25.1	hypothetical protein
1	Linum usitatissimum	1	1	1	418000	AFN53684.1	AFN53684.1	0+849+9+564	0+849+9+564	0.6	0.6	1	6.52	6.52	26	26.1	putative ATP-binding protein
2	Linum usitatissimum	1	1	2	2170000	AFJ52915.1	AFJ52915.1	0+436+14+43	0+436+14+43	2.8	2.8	1	6.41	6.41	27	27.1	UDP-glycosyltransferase 1
1	Linum usitatissimum	1	1	1	2070000	AMY26633.1	AMY26633.1	0+11+8+559	0+11+8+559	1.3	1.3	1	6.36	6.36	28	28.1	cgi-12 protein-related-mitochondrial transcription termination factor, mterf
1	Linum usitatissimum	1	1	1	269000	AND01198.1	AND01198.1	0+537+7+137	0+537+7+137	1	1	1	6.2	6.2	29	29.1	putative GRAS domain family protein
2	Linum usitatissimum	1	1	2	13400000	AGM31788.1	AGM31788.1	0+6+7+235	0+6+7+235	2.8	2.8	1	6.17	6.17	30	30.1	squalene monooxygenase, partial
1	Linum usitatissimum	1	1	1	985000	AFU96169.1	AFU96169.1|ATU06737.1|YP_009443537.1	0+183+20+122	0+183+20+122|0+180+20+120|0+180+20+120	6.1	6.1|6.2|6.2	1	5.89	5.89|5.89|5.89	31	31.1	PetA, partial (chloroplast)
1	Linum usitatissimum	1	1	1	490000	CBD24685.1	CBD24685.1|CBD32242.1	0+222+6+97	0+222+6+97|0+222+6+97	1.8	1.8|1.8	1	5.71	5.71|5.71	32	32.1	unnamed protein product
3	Linum usitatissimum	1	1	3	3740000	AEG76903.1	AEG76903.1	1+8+919	1+8+919	0.7	0.7	1	5.62	5.62	33	33.1	putative ATP-binding cassette transporter, partial
1	Linum usitatissimum	1	1	1	1920000	CAY34003.1	CAY34003.1|CAY35817.1	0+209+8+45	0+209+8+45|0+209+8+45	3	3|3	1	5.33	5.33|5.33	34	34.1	unnamed protein product
2	Linum usitatissimum	1	1	2	29700000	AFJ52949.1	AFJ52949.1	0+422+12+39	0+422+12+39	2.5	2.5	1	5.24	5.24	35	35.1	UDP-glycosyltransferase 1
1	Linum usitatissimum	1	1	1	537000	AAK28803.1	AAK28803.1|AAK28804.1|AAK28806.1|AAK28809.1|AAK28810.1|AAK28811.1|AAK28812.1|CAW34714.1|CAW34715.1|CAW34716.1|CAW34717.1|CAW34719.1|CAW34721.1|CAW34722.1|CAW34916.1|CAW34917.1|CAW34918.1|CAW34919.1|CAW34921.1|CAW34923.1|CAW34924.1|CAW39697.1|CAW39698.1|CAW39699.1|CAW39700.1|CAW39702.1|CAW39704.1|CAW39706.1|CAW42678.1|CAW42679.1|CAW42680.1|CAW42681.1|CAW42683.1|CAW42685.1|CAW42686.1|CAW43253.1|CAW…	0+403+7+790	0+403+7+790|0+401+7+788|0+416+7+788|0+401+7+780|0+416+7+779|0+416+7+788|0+416+7+779|0+416+7+779|0+416+7+788|0+416+7+779|0+401+7+780|0+416+7+788|0+401+7+788|0+403+7+790|0+416+7+779|0+416+7+788|0+416+7+779|0+401+7+780|0+416+7+788|0+401+7+788|0+403+7+790|0+416+7+779|0+416+7+788|0+416+7+779|0+401+7+780|0+416+7+788|0+401+7+788|0+403+7+790|0+416+7+779|0+416+7+788|0+416+7+779|0+401+7+780|0+416+7+788|0+4…	0.5	0.5|0.5|0.5|0.5|0.5|0.5|0.5|0.5|0.5|0.5|0.5|0.5|0.5|0.5|0.5|0.5|0.5|0.5|0.5|0.5|0.5|0.5|0.5|0.5|0.5|0.5|0.5|0.5|0.5|0.5|0.5|0.5|0.5|0.5|0.5|0.5|0.5|0.5|0.5|0.5|0.5|0.5|0.5|0.5|0.5|0.5|0.5|0.5|0.5|0.5|0.5|0.5|0.5|0.5|0.5|0.5|0.5|0.5|0.5|0.5|0.5|0.5|0.5|0.5|0.5|0.5|0.5|0.5|0.5|0.5|0.5|0.5|0.5|0.5|0.5|0.5|0.5|0.5|0.5|0.5|0.5|0.5|0.5|0.5|0.5|0.5|0.5|0.5|0.5|0.5|0.5|0.5|0.5|0.5|0.5|0.5|0.5|0.5|0.5|0.5…	1	5.13	5.13|5.13|5.13|5.13|5.13|5.13|5.13|5.13|5.13|5.13|5.13|5.13|5.13|5.13|5.13|5.13|5.13|5.13|5.13|5.13|5.13|5.13|5.13|5.13|5.13|5.13|5.13|5.13|5.13|5.13|5.13|5.13|5.13|5.13|5.13|5.13|5.13|5.13|5.13|5.13|5.13|5.13|5.13|5.13|5.13|5.13|5.13|5.13|5.13|5.13|5.13|5.13|5.13|5.13|5.13|5.13|5.13|5.13|5.13|5.13|5.13|5.13|5.13|5.13|5.13|5.13|5.13|5.13|5.13|5.13|5.13|5.13|5.13|5.13|5.13|5.13|5.13|5.13|5.13|5.13…	36	36.1	resistance-like protein P1-A
1	Linum usitatissimum	1	1	1	839000	CAV28198.1	CAV28198.1	0+6+10+177	0+6+10+177	5.1	5.1	1	4.88	4.88	37	37.1	unnamed protein product
1	Linum usitatissimum	1	1	1	2250000	CAC35338.1	CAC35338.1|CAW34703.1|CAW34903.1|CAW39686.1|CAW42667.1|CAW43240.1|CAW49600.1|CAW54625.1|CAW54925.1|CAW58839.1|CAW59165.1|CAW69068.1|CAW72806.1|CAW77955.1|CAX07740.1|CBC00738.1|CBC00937.1|CBC05477.1|CBC08196.1|CBC08768.1|CBC17735.1|CBC27843.1|CBC28447.1|CBC36268.1|CBC36915.1|CBC56659.1|CBC64086.1|CBC74365.1|CBD16664.1|CBD22432.1|CBD25048.1|CBD25740.1	0+399+14+695	0+399+14+695|0+399+14+695|0+399+14+695|0+399+14+695|0+399+14+695|0+399+14+695|0+399+14+695|0+399+14+695|0+399+14+695|0+399+14+695|0+399+14+695|0+399+14+695|0+399+14+695|0+399+14+695|0+399+14+695|0+399+14+695|0+399+14+695|0+399+14+695|0+399+14+695|0+399+14+695|0+399+14+695|0+399+14+695|0+399+14+695|0+399+14+695|0+399+14+695|0+399+14+695|0+399+14+695|0+399+14+695|0+399+14+695|0+399+14+695|0+399+14+…	1.2	1.2|1.2|1.2|1.2|1.2|1.2|1.2|1.2|1.2|1.2|1.2|1.2|1.2|1.2|1.2|1.2|1.2|1.2|1.2|1.2|1.2|1.2|1.2|1.2|1.2|1.2|1.2|1.2|1.2|1.2|1.2|1.2	1	4.84	4.84|4.84|4.84|4.84|4.84|4.84|4.84|4.84|4.84|4.84|4.84|4.84|4.84|4.84|4.84|4.84|4.84|4.84|4.84|4.84|4.84|4.84|4.84|4.84|4.84|4.84|4.84|4.84|4.84|4.84|4.84|4.84	38	38.1	Nbi-D protein
1	Linum usitatissimum	1	1	1	3510000	AFN53715.1	AFN53715.1|AMY26615.1	0+403+32+491	0+403+32+491|0+127+32+206	3.4	3.4|8.7	1	4.78	4.78|4.78	39	39.1	putative GDSL-like lipase acylhydrolase protein
1	Linum usitatissimum	1	1	1	1550000	AER92601.1	AER92601.1	0+89+7+155	0+89+7+155	2.7	2.7	1	4.73	4.73	40	40.1	putative coilin
1	Linum usitatissimum	1	1	1	805000	CBD32953.1	CBD32953.1|CBD33653.1	0+274+9+224	0+274+9+224|0+274+9+224	1.7	1.7|1.7	1	4.66	4.66|4.66	41	41.1	unnamed protein product
1	Linum usitatissimum	1	1	1	490000	CAW37908.1	CAW37908.1|CAW41948.1|CAW47893.1|CAW65285.1|CAW72762.1|CAW81399.1|CBC03780.1|CBC07517.1|CBC14322.1|CBC49058.1|CBC64000.1|CBC81210.1|CBD35126.1	0+233+7+45	0+233+7+45|0+233+7+45|0+233+7+45|0+233+7+45|0+233+7+45|0+233+7+45|0+233+7+45|0+233+7+45|0+233+7+45|0+233+7+45|0+233+7+45|0+233+7+45|0+233+7+45	2.4	2.4|2.4|2.4|2.4|2.4|2.4|2.4|2.4|2.4|2.4|2.4|2.4|2.4	1	4.48	4.48|4.48|4.48|4.48|4.48|4.48|4.48|4.48|4.48|4.48|4.48|4.48|4.48	42	42.1	unnamed protein product
1	Linum usitatissimum	1	1	1	274000	CAZ78242.1	CAZ78242.1|CAZ78669.1	0+38+6+66	0+38+6+66|0+38+6+66	5.4	5.4|5.4	1	4.44	4.44|4.44	43	43.1	unnamed protein product
1	Linum usitatissimum	1	1	1	1330000	AFJ52993.1	AFJ52993.1	0+53+17+431	0+53+17+431	3.3	3.3	1	4.14	4.14	44	44.1	UDP-glycosyltransferase 1
1	Linum usitatissimum	1	1	1	2440000	AFN53650.1	AFN53650.1	0+127+9+229	0+127+9+229	2.4	2.4	1	4.14	4.14	45	45.1	hypothetical protein

## Sheet: Hemp oil
numSpectraProteinObserved	species	numSpeciesPresentR1	numPepsUniqueSpecies1	numSpectraSpecies1	totalIntensitySpecies1	accession_number	accession_numbers	coverage_map	coverage_maps	percentCoverage	percentCoverages	numPepsUnique	scoreUnique	scoresUnique	groupNum	subgroupNum	entry_name
110	Cannabis sativa	1	29	110	1320000000	CDP79028.1	CDP79028.1|CDP79029.1|SNQ45155.1|SNQ45156.1|CDP79027.1	0+44+9+8+31+5+37+11+12+49+9+19+42+5+20+16+17+3+13+13+20+4+58+5+15+7+17+2	0+44+9+8+31+5+37+11+12+49+9+19+42+5+20+16+17+3+13+13+20+4+58+5+15+7+17+2|0+44+9+8+31+5+37+11+12+49+9+19+42+5+20+16+17+3+13+13+20+4+58+5+15+7+17+2|0+44+9+8+31+5+37+11+12+49+9+19+42+5+20+16+17+3+13+13+20+4+58+5+15+7+17+2|0+44+9+8+31+5+37+11+12+49+9+19+42+5+20+16+17+3+13+13+20+4+58+5+15+7+17+2|0+44+9+8+31+5+37+11+12+49+9+19+42+5+20+16+17+3+13+13+20+4+58+27+17+2	61	61|61|61|61|58	29	490.4	490.4|490.4|490.4|490.4|465.28	1	1.1	edestin 2
112	Cannabis sativa	1	27	112	1240000000	SNQ45160.1	SNQ45160.1	0+26+14+4+32+26+25+14+59+6+53+17+10+1+8+21+10+10+16+10+20+4+9+8+28+18+15+27	0+26+14+4+32+26+25+14+59+6+53+17+10+1+8+21+10+10+16+10+20+4+9+8+28+18+15+27	60.8	60.8	27	453.22	453.22	2	2.1	edestin 3
87	Cannabis sativa	1	24	87	1090000000	SNQ45158.1	SNQ45158.1	0+26+50+26+25+58+21+1+52+17+10+1+8+21+10+10+16+10+20+4+9+8+28+18+15+10+14+5	0+26+50+26+25+58+21+1+52+17+10+1+8+21+10+10+16+10+20+4+9+8+28+18+15+10+14+5	56.3	56.3	24	390.94	390.94	2	2.2	edestin 3
110	Cannabis sativa	1	26	110	1740000000	CDP79023.1	CDP79023.1|CDP79025.1|SNQ45157.1|SNQ45159.1|CDP79024.1|CDP79026.1	0+37+13+5+27+26+33+51+17+19+7+9+40+15+8+22+10+10+13+13+20+4+10+7+41+5+15+10+20+4	0+37+13+5+27+26+33+51+17+19+7+9+40+15+8+22+10+10+13+13+20+4+10+7+41+5+15+10+20+4|0+37+13+5+27+26+33+51+17+19+7+9+40+15+8+22+10+10+13+13+20+4+10+7+41+5+15+10+20+4|0+37+13+5+27+26+33+51+17+19+7+9+40+15+8+22+10+10+13+13+20+4+10+7+41+5+15+10+20+4|0+37+13+5+27+26+33+51+17+19+7+9+40+15+8+22+10+10+13+13+20+4+10+7+41+5+15+10+20+4|0+37+13+5+27+26+33+51+17+19+7+9+40+15+8+22+10+10+13+13+20+21+41+5+15+10+20+…	53.6	53.6|53.6|53.6|53.6|51.6|41.6	26	434.31	434.31|434.31|434.31|434.31|416.07|342.04	3	3.1	edestin 1
18	Cannabis sativa	1	6	18	191000000	SNQ45151.1	SNQ45151.1|SNQ45152.1	0+41+8+3+7+39+16+8+18+2	0+41+8+3+7+39+16+8+18+2|0+41+8+3+7+39+16+8+18+2	34.5	34.5|34.5	6	95.29	95.29|95.29	4	4.1	Albumin
9	Cannabis sativa	1	4	9	6910000	SNQ45153.2	SNQ45153.2	0+90+9+43+17+53+18+134+9+120	0+90+9+43+17+53+18+134+9+120	10.7	10.7	4	65.5	65.5	5	5.1	7S vicilin-like protein
2	Cannabis sativa	2	1	2	1050000	AEI27419.1	AEI27419.1|AJK91429.1|AKK32282.1|AKX33555.1|AMC30663.1|AQY15329.1|ARC99291.1|AXX76729.1|YP_009123080.1|YP_009143560.1|AKP55255.1	0+113+11+289	0+113+11+289|0+167+11+320|0+167+11+320|0+167+11+320|0+167+11+320|0+167+11+320|0+167+11+320|0+167+11+320|0+167+11+320|0+167+11+320|0+167+11+320	2.6	2.6|2.2|2.2|2.2|2.2|2.2|2.2|2.2|2.2|2.2|2.2	1	7.12	7.12|7.12|7.12|7.12|7.12|7.12|7.12|7.12|7.12|7.12|7.12	6	6.1	ATP synthase beta subunit, partial (chloroplast)
1	Cannabis sativa	1	1	1	571000	DAC76714.1	DAC76714.1	0+24+11+349	0+24+11+349	2.8	2.8	1	5.63	5.63	7	7.1	TPA_exp: prenyltransferase 5
1	Cannabis sativa	2	1	1	393000	AJK91464.1	AJK91464.1|AJK91481.1|AKK32262.1|AKK32263.1|AKX33590.1|AKX33608.1|AQY15365.1|AQY15385.1|ARC99325.1|AXX76766.1|AXX76783.1|YP_009123115.1|YP_009123132.1|YP_009143596.1|YP_009143614.1|AKP55235.1|AKP55236.1	0+761+11+1530	0+761+11+1530|0+761+11+1530|0+761+11+1530|0+761+11+1530|0+761+11+1530|0+761+11+1530|0+761+11+1530|0+761+11+1530|0+761+11+1530|0+761+11+1530|0+761+11+1530|0+761+11+1530|0+761+11+1530|0+761+11+1530|0+761+11+1530|0+761+11+1530|0+761+11+1530	0.4	0.4|0.4|0.4|0.4|0.4|0.4|0.4|0.4|0.4|0.4|0.4|0.4|0.4|0.4|0.4|0.4|0.4	1	4.29	4.29|4.29|4.29|4.29|4.29|4.29|4.29|4.29|4.29|4.29|4.29|4.29|4.29|4.29|4.29|4.29|4.29	8	8.1	hypothetical chloroplast RF21 (chloroplast)
1	Cannabis sativa	1	1	1	410000	QCQ18307.1	QCQ18307.1	0+59+9+503	0+59+9+503	1.5	1.5	1	4.27	4.27	9	9.1	germacrene B synthase

## Sheet: Milk thistle
numSpectraProteinObserved	species	numSpeciesPresentR1	numPepsUniqueSpecies1	numSpectraSpecies1	totalIntensitySpecies1	accession_number	accession_numbers	coverage_map	coverage_maps	percentCoverage	percentCoverages	numPepsUnique	scoreUnique	scoresUnique	groupNum	subgroupNum	entry_name
5	Silybum marianum	1	2	5	23000000	AGE15495.1	AGE15495.1	0+229+21+194+12+53	0+229+21+194+12+53	6.4	6.4	2	38.35	38.35	1	1.1	preprosilpepsin 2
1	Silybum marianum	1	1	1	1050000	ALE29259.1	ALE29259.1|YP_009170270.1	0+166+11+320	0+166+11+320|0+166+11+320	2.2	2.2|2.2	1	5.02	5.02|5.02	2	2.1	ATP synthase CF1 beta subunit (chloroplast)

## Sheet: Nigella oil
numSpectraProteinObserved	species	numSpeciesPresentR1	numPepsUniqueSpecies1	numSpectraSpecies1	totalIntensitySpecies1	accession_number	accession_numbers	coverage_map	coverage_maps	percentCoverage	percentCoverages	numPepsUnique	scoreUnique	scoresUnique	groupNum	subgroupNum	entry_name
5	Nigella sativa	1	3	5	12100000	pdb|2NB2|A	pdb|2NB2|A	0+2+36	0+2+36	94.7	94.7	3	51.07	51.07	1	1.1	Chain A, nigellin-1.1
2	Nigella sativa	1	1	2	1550000	sp|C0HJH9.1|THNW1_NIGSA	sp|C0HJH9.1|THNW1_NIGSA	0+24+9+2	0+24+9+2	25.7	25.7	1	11.29	11.29	2	2.1	RecName: Full=Thionin NsW1
2	Nigella damascena	1	1	2	3410000	ABW74608.1	ABW74608.1|QBK49517.1|YP_009581452.1	0+145+11+320	0+145+11+320|0+167+11+320|0+167+11+320	2.3	2.3|2.2|2.2	1	5.03	5.03|5.03|5.03	3	3.1	ATP synthase beta subunit, partial (chloroplast)
1	Nigella damascena	1	1	1	693000	QBK49546.1	QBK49546.1|YP_009581481.1	0+23+8+91	0+23+8+91|0+23+8+91	6.5	6.5|6.5	1	5	5|5	4	4.1	ribosomal protein L14 (chloroplast)

## Sheet: Pumpkin oil
numSpectraProteinObserved	species	numSpeciesPresentR1	numPepsUniqueSpecies1	numSpectraSpecies1	totalIntensitySpecies1	accession_number	accession_numbers	coverage_map	coverage_maps	percentCoverage	percentCoverages	numPepsUnique	scoreUnique	scoresUnique	groupNum	subgroupNum	entry_name
114	Cucurbita pepo subsp. pepo	1	3	13	59100000	XP_023553731.1	XP_023553731.1|XP_022963931.1|XP_022967669.1	0+52+39+29+24+8+68+5+30+10+16+2+24+23+20+26+20+4+58+5+12+36	0+52+39+29+24+8+68+5+30+10+16+2+24+23+20+26+20+4+58+5+12+36|0+52+39+29+24+8+43+30+30+10+16+2+24+23+20+26+20+4+58+5+12+36|0+52+39+29+24+8+22+21+16+54+16+2+20+27+20+26+20+4+45+18+12+36	60.8	60.8|55.9|45.7	30	552.27	552.27|500.62|393.22	1	1.1	11S globulin subunit beta-like
90	Cucurbita pepo subsp. pepo	1	3	4	29000000	XP_023532598.1	XP_023532598.1|XP_022930971.1|XP_022995606.1	0+48+57+11+22+10+64+9+30+14+12+6+16+23+28+5+8+5+20+4+58+5+12+8+19+8	0+48+57+11+22+10+64+9+30+14+12+6+16+23+28+5+8+5+20+4+58+5+12+8+19+8|0+44+57+11+22+10+64+9+30+14+12+6+16+23+28+5+8+5+20+4+45+18+12+35|0+56+45+11+22+10+22+67+14+14+12+45+28+5+8+5+20+4+32+1+12+18+12+8+19+8	68.9	68.9|63|49.3	28	497.25	497.25|450.25|334.16	1	1.2	11S globulin subunit beta-like
79	Cucurbita pepo subsp. pepo	1	4	17	40800000	XP_023527143.1	XP_023527143.1|XP_022956153.1|BAA34056.1|XP_022979464.1|XP_022979465.1	0+428+17+59+12+1+78+40+35+11+40+30+66+10+12+19	0+428+17+59+12+1+78+40+35+11+40+30+66+10+12+19|0+454+12+1+78+40+35+11+40+30+26+13+27+10+12+19|0+380+17+59+12+1+49+69+35+11+12+58+26+13+27+10+12+19|0+380+17+59+12+1+49+69+35+11+12+58+26+13+27+10+12+19|0+346+17+59+12+1+49+69+35+11+12+58+26+13+27+10+12+19	30.3	30.3|28.4|23.4|23.4|24.4	22	408.19	408.19|333.05|295.54|295.54|295.54	2	2.1	vicilin-like
84	Cucurbita moschata	1	24	84	1140000000	XP_022964523.1	XP_022964523.1	0+60+28+18+42+5+56+17+56+44+13+8+25+4+58+5+12+8+9+12	0+60+28+18+42+5+56+17+56+44+13+8+25+4+58+5+12+8+9+12	62.2	62.2	24	407.15	407.15	3	3.1	11S globulin subunit beta
91	Cucurbita pepo subsp. pepo	1	23	91	1290000000	XP_023515280.1	XP_023515280.1	0+60+28+18+42+5+56+17+56+44+13+8+25+4+58+5+12+8+9+12	0+60+28+18+42+5+56+17+56+44+13+8+25+4+58+5+12+8+9+12	62.2	62.2	23	403.92	403.92	3	3.2	11S globulin subunit beta
69	Cucurbita maxima	2	21	69	688000000	XP_023000493.1	XP_023000493.1|pdb|2E9Q|A|pdb|2EVX|A|AAA33110.1|pir||FWPU1B|sp|P13744.1|11SB_CUCMA	0+60+28+29+17+19+56+17+56+65+25+4+58+5+12+8+9+12	0+60+28+29+17+19+56+17+56+65+25+4+58+5+12+8+9+12|0+39+28+29+17+19+56+17+56+65+25+4+58+5+12+8+9+12|0+39+28+29+17+19+56+17+56+65+25+4+58+5+12+8+9+12|0+117+17+19+56+17+56+65+25+4+58+5+12+8+9+12|0+117+17+19+56+17+56+65+25+4+58+5+12+8+9+12|0+117+17+19+56+17+56+65+25+4+58+5+12+8+9+12	54.3	54.3|56.8|56.8|48.5|48.5|48.5	21	370.34	370.34|370.34|370.34|323.44|323.44|323.44	3	3.3	11S globulin subunit beta
68	Cucurbita pepo subsp. pepo	1	8	24	141000000	XP_023548082.1	XP_023548082.1|XP_023006382.1	0+121+28+29+16+1+14+5+44+29+25+1+30+42+13+8+25+4+58+5+12+8+9+12	0+121+28+29+16+1+14+5+44+29+25+1+30+42+13+8+25+4+58+5+12+8+9+12|0+121+28+29+16+1+14+5+44+55+30+42+13+69+26+25+9+12	50.8	50.8|33.3	21	366.86	366.86|242.3	3	3.4	11S globulin subunit beta-like
50	Cucurbita moschata	1	17	50	280000000	XP_022959468.1	XP_022959468.1	0+59+28+29+16+1+14+5+44+55+10+62+13+8+25+4+58+5+12+8+9+15	0+59+28+29+16+1+14+5+44+55+10+62+13+8+25+4+58+5+12+8+9+15	47.7	47.7	17	289.86	289.86	3	3.5	11S globulin subunit beta-like
80	Cucurbita pepo subsp. pepo	1	2	5	20100000	XP_023553732.1	XP_023553732.1|XP_022963932.1	0+26+10+11+28+58+12+5+41+19+32+12+24+15+9+11+13+8+44+3+27+7+33+3+17+4	0+26+10+11+28+58+12+5+41+19+32+12+24+15+9+11+13+8+44+3+27+7+33+3+17+4|0+26+10+11+28+58+12+5+41+19+32+12+24+15+9+11+13+8+44+3+27+7+33+24	61.4	61.4|57.8	19	352.1	352.1|319.73	4	4.1	11S globulin seed storage protein 2-like
49	Cucurbita maxima	1	9	49	651000000	XP_022967670.1	XP_022967670.1	0+87+37+9+12+109+24+15+9+51+25+3+27+7+33+23	0+87+37+9+12+109+24+15+9+51+25+3+27+7+33+23	35.4	35.4	9	176.35	176.35	4	4.2	11S globulin seed storage protein 2-like
52	Cucurbita pepo subsp. pepo	1	13	52	411000000	XP_023532597.1	XP_023532597.1	0+49+77+9+12+5+13+56+29+47+9+11+13+8+19+28+27+18+25+2+13+4	0+49+77+9+12+5+13+56+29+47+9+11+13+8+19+28+27+18+25+2+13+4	50	50	13	239.93	239.93	5	5.1	11S globulin seed storage protein 2-like
41	Cucurbita moschata	1	2	10	75300000	XP_022930973.1	XP_022930973.1|XP_022995608.1	0+48+28+58+12+5+13+56+29+47+9+11+13+8+19+28+27+18+25+22	0+48+28+58+12+5+13+56+29+47+9+11+13+8+19+28+27+18+25+22|0+48+28+58+12+5+13+132+9+11+13+8+19+73+25+23	36.7	36.7|24.9	11	205.72	205.72|161.68	5	5.2	11S globulin seed storage protein 2-like
17	Cucurbita pepo subsp. pepo	1	3	4	2220000	XP_023511963.1	XP_023511963.1|XP_022943526.1	0+75+16+22+12+9+17+132+10+96+14+1+59+36	0+75+16+22+12+9+17+132+10+96+14+1+59+36|0+75+16+22+12+9+17+132+10+96+14+92	25.6	25.6|13.9	8	136.31	136.31|78.3	6	6.1	vicilin-like seed storage protein At2g28490
14	Cucurbita hybrid cultivar	2	6	14	9400000	BAA06186.1	BAA06186.1|XP_022985621.1	0+81+16+22+12+9+17+132+10+96+14+18+17+55	0+81+16+22+12+9+17+132+10+96+14+18+17+55|0+81+16+22+12+9+17+132+10+96+14+18+17+55	17.2	17.2|17.2	6	97.59	97.59|97.59	6	6.2	preproMP27-MP32
21	Cucurbita moschata	2	7	21	52800000	XP_022923933.1	XP_022923933.1|XP_023519948.1|XP_023001528.1|XP_023000976.1|XP_022923773.1|XP_023519994.1	0+48+21+23+11+22+26+27+15+19+23+17+17+38+17+26	0+48+21+23+11+22+26+27+15+19+23+17+17+38+17+26|0+48+21+23+11+22+26+27+15+19+23+17+17+38+17+26|0+48+21+23+11+22+26+27+15+59+17+38+17+26|0+48+21+279|0+48+21+295|0+48+21+285	37.1	37.1|37.1|30.5|6|5.7|5.9	7	133.1	133.1|133.1|113.42|19.59|19.59|19.59	7	7.1	11-beta-hydroxysteroid dehydrogenase 1B-like
7	Cucurbita pepo subsp. pepo	1	1	4	9930000	XP_023520423.1	XP_023520423.1|XP_022932144.1	0+46+17+14+10+10+13+15+15	0+46+17+14+10+10+13+15+15|0+77+10+10+13+15+15	39.2	39.2|27.1	4	74.43	74.43|54.73	8	8.1	2S albumin-like
8	Cucurbita moschata	2	4	8	10500000	XP_022940345.1	XP_022940345.1|XP_023539729.1|XP_023539730.1|XP_022971427.1	0+12+11+35+12+12+29	0+12+11+35+12+12+29|0+12+11+35+12+12+29|0+12+11+35+12+12+29|0+12+11+35+12+26+11	46.8	46.8|46.8|46.8|31.7	4	63.21	63.21|63.21|63.21|48.24	9	9.1	11 kDa late embryogenesis abundant protein-like
8	Cucurbita moschata	1	1	3	4330000	XP_022928435.1	XP_022928435.1|XP_022989214.1|XP_023529459.1	0+113+13+2+34+2	0+113+13+2+34+2|0+113+13+2+22+12|0+113+13+2+22+16	28.6	28.6|21.6|21	4	62.5	62.5|44.94|44.94	10	10.1	oleosin 18.2 kDa-like
5	Cucurbita maxima	3	3	5	5710000	XP_022983488.1	XP_022983488.1|XP_022935477.1|XP_023523068.1|XP_023528638.1	0+113+13+2+22+8	0+113+13+2+22+8|0+158+13+2+22+8|0+113+13+2+22+8|0+158+13+2+22+8	22.1	22.1|17.2|22.1|17.2	3	46.12	46.12|46.12|46.12|46.12	10	10.2	oleosin 18.2 kDa-like
4	Cucurbita moschata	2	4	4	2270000	XP_022939508.1	XP_022939508.1|XP_023550995.1|XP_022993105.1	0+8+20+113+22+13	0+8+20+113+22+13|0+8+20+113+22+13|0+141+11+24	23.8	23.8|23.8|6.2	4	45.21	45.21|45.21|15.7	11	11.1	oleosin 18.2 kDa-like
9	Cucurbita hybrid cultivar	4	4	9	101000000	BAA03993.1	BAA03993.1|XP_022993226.1|XP_023545481.1|sp|Q39649.1|2SS_CUCMA|XP_022942593.1	0+78+10+3+20+15+12+3	0+78+10+3+20+15+12+3|0+78+10+3+20+15+12+3|0+78+10+3+20+15+12+3|0+78+10+3+20+15+12+3|0+91+20+15+12+3	29.7	29.7|29.7|29.7|29.7|22.6	4	44.68	44.68|44.68|44.68|44.68|32.43	12	12.1	prepro2S albumin
3	Cucurbita pepo subsp. pepo	1	1	1	545000	XP_023551832.1	XP_023551832.1|XP_022985493.1|XP_022922637.1	0+173+27+140	0+173+27+140|0+171+13+154|0+171+13+154	7.9	7.9|3.8|3.8	2	35.66	35.66|23.55|23.55	13	13.1	NADPH-dependent aldehyde reductase 1, chloroplastic-like
4	Cucurbita pepo subsp. pepo	1	1	1	451000	XP_023548700.1	XP_023548700.1|XP_022991581.1|XP_022953941.1|XP_022991676.1|XP_022954121.1|XP_023548702.1	0+87+13+2+11+26	0+87+13+2+11+26|0+62+13+37|0+69+13+37|0+61+11+27|0+61+11+27|0+61+11+23	17.2	17.2|11.6|10.9|11.1|11.1|11.5	2	34.23	34.23|18.81|18.81|15.42|15.42|15.42	14	14.1	late embryogenesis abundant protein 7
3	Cucurbita maxima	3	2	3	2610000	XP_023006084.1	XP_023006084.1|XP_022959257.1|XP_023547968.1	0+112+20+30+19+58	0+112+20+30+19+58|0+112+20+30+19+58|0+112+20+30+19+58	16.3	16.3|16.3|16.3	2	26.15	26.15|26.15|26.15	15	15.1	peroxygenase-like
1	Cucurbita maxima	3	1	1	14600000	XP_022984798.1	XP_022984798.1|XP_022942616.1|XP_023522829.1	0+105+12+22	0+105+12+22|0+105+12+22|0+105+12+8	8.6	8.6|8.6|9.6	1	21.66	21.66|21.66|21.66	16	16.1	2S sulfur-rich seed storage protein 2-like
2	Cucurbita maxima	3	1	2	1440000	XP_022982419.1	XP_022982419.1|XP_022941228.1|XP_023524411.1	0+74+14+71	0+74+14+71|0+74+14+71|0+74+14+71	8.8	8.8|8.8|8.8	1	21	21|21|21	17	17.1	17.1 kDa class II heat shock protein-like
4	Cucurbita pepo subsp. pepo	1	1	4	2180000	XP_023553197.1	XP_023553197.1	0+22+21+95	0+22+21+95	15.2	15.2	1	19.81	19.81	18	18.1	dehydrin DHN3-like
2	Cucurbita maxima	3	1	2	792000	XP_022972676.1	XP_022972676.1|XP_022977801.1|XP_022925911.1|XP_022963125.1|QAY29594.1|XP_023518286.1|XP_023543795.1	0+321+14+109	0+321+14+109|0+321+14+109|0+321+14+109|0+321+14+109|0+321+14+109|0+321+14+109|0+321+14+109	3.1	3.1|3.1|3.1|3.1|3.1|3.1|3.1	1	18.4	18.4|18.4|18.4|18.4|18.4|18.4|18.4	19	19.1	enolase-like
2	Cucurbita pepo subsp. pepo	1	1	2	2910000	XP_023547904.1	XP_023547904.1	0+162+12+307	0+162+12+307	2.4	2.4	1	17.18	17.18	20	20.1	sucrose-binding protein-like
1	Cucurbita maxima	3	1	1	447000	XP_022982941.1	XP_022982941.1|XP_022935349.1|XP_022935350.1|XP_023527803.1	0+41+10+415	0+41+10+415|0+41+10+416|0+41+10+394|0+41+10+416	2.1	2.1|2.1|2.2|2.1	1	15.78	15.78|15.78|15.78|15.78	21	21.1	embryonic protein DC-8
4	Cucurbita moschata	2	1	4	4440000	XP_022939316.1	XP_022939316.1|XP_023550896.1	0+38+16+106	0+38+16+106|0+38+16+106	10	10|10	1	14.44	14.44|14.44	22	22.1	17.4 kDa class I heat shock protein-like
2	Cucurbita moschata	2	1	2	16100000	XP_022925648.1	XP_022925648.1|XP_023543209.1	0+552+8+95	0+552+8+95|0+547+8+94	1.2	1.2|1.2	1	14.4	14.4|14.4	23	23.1	protein CNGC15b-like
1	Cucurbita moschata	1	1	1	11400000	XP_022943111.1	XP_022943111.1	0+158+12+307	0+158+12+307	2.5	2.5	1	14.2	14.2	24	24.1	alpha-galactosidase 3-like isoform X2
1	Cucurbita maxima	2	1	1	558000	XP_022967448.1	XP_022967448.1|XP_022967451.1|XP_022967456.1|XP_022967465.1|XP_022967468.1|XP_022967469.1|XP_022967470.1|XP_022967471.1|XP_022967475.1|XP_022967476.1|XP_022967481.1|XP_022967485.1|XP_022967488.1|XP_022967489.1|XP_022967492.1|XP_022967493.1|XP_022967497.1|XP_022963716.1|XP_022963725.1|XP_022963726.1|XP_022963727.1|XP_022963728.1|XP_022963731.1|XP_022963733.1|XP_022963734.1|XP_022963740.1|XP_022963…	0+929+8+183	0+929+8+183|0+905+8+199|0+891+8+199|0+875+8+199|0+867+8+199|0+867+8+199|0+867+8+199|0+867+8+199|0+859+8+199|0+859+8+199|0+851+8+199|0+843+8+199|0+835+8+199|0+835+8+199|0+827+8+199|0+827+8+199|0+699+8+199|0+487+8+427|0+463+8+427|0+455+8+427|0+455+8+427|0+455+8+427|0+447+8+427|0+439+8+427|0+439+8+427|0+415+8+427|0+399+8+427	0.7	0.7|0.7|0.7|0.7|0.7|0.7|0.7|0.7|0.7|0.7|0.7|0.7|0.7|0.7|0.7|0.7|0.8|0.8|0.8|0.8|0.8|0.8|0.9|0.9|0.9|0.9|0.9	1	14.03	14.03|14.03|14.03|14.03|14.03|14.03|14.03|14.03|14.03|14.03|14.03|14.03|14.03|14.03|14.03|14.03|14.03|14.03|14.03|14.03|14.03|14.03|14.03|14.03|14.03|14.03|14.03	25	25.1	fibroin heavy chain-like isoform X3
1	Cucurbita maxima	3	1	1	1080000	XP_022990685.1	XP_022990685.1|XP_022992617.1|XP_023000806.1|XP_022923635.1|XP_022938664.1|XP_022955398.1|XP_023519191.1|XP_023551034.1|XP_023553624.1	0+300+11+26	0+300+11+26|0+300+11+26|0+300+11+26|0+300+11+26|0+300+11+26|0+300+11+26|0+300+11+26|0+300+11+26|0+300+11+26	3.2	3.2|3.2|3.2|3.2|3.2|3.2|3.2|3.2|3.2	1	13.06	13.06|13.06|13.06|13.06|13.06|13.06|13.06|13.06|13.06	26	26.1	glyceraldehyde-3-phosphate dehydrogenase 2, cytosolic-like
1	Cucurbita maxima	3	1	1	377000	XP_022991246.1	XP_022991246.1|XP_022991248.1|XP_022953721.1|XP_022953722.1|XP_022953723.1|XP_023547994.1	0+120+15+35	0+120+15+35|0+120+15+35|0+120+15+35|0+120+15+35|0+120+15+4|0+120+15+35	8.8	8.8|8.8|8.8|8.8|10.7|8.8	1	12.94	12.94|12.94|12.94|12.94|12.94|12.94	27	27.1	universal stress protein A-like protein
1	Cucurbita maxima	2	1	1	4530000	XP_022991956.1	XP_022991956.1|XP_022953499.1	0+272+17+192	0+272+17+192|0+272+17+192	3.5	3.5|3.5	1	12.24	12.24|12.24	28	28.1	sucrose-binding protein-like
1	Cucurbita maxima	3	1	1	998000	BAB78478.1	BAB78478.1|XP_022978434.1|XP_022950793.1|XP_023545029.1	0+184+16+485	0+184+16+485|0+184+16+448|0+185+16+399|0+185+16+537	2.3	2.3|2.4|2.6|2.1	1	12.09	12.09|12.09|12.09|12.09	29	29.1	preproMP73
1	Cucurbita maxima	3	1	1	464000	XP_022978126.1	XP_022978126.1|XP_022978137.1|XP_022978151.1|XP_022978171.1|XP_022957035.1|XP_023529916.1|XP_023529952.1|XP_023529964.1|XP_023529977.1|XP_023529988.1|XP_023529998.1	0+44+9+106	0+44+9+106|0+44+9+106|0+44+9+106|0+40+9+106|0+44+9+106|0+44+9+106|0+44+9+106|0+44+9+106|0+44+9+106|0+44+9+106|0+44+9+106	5.6	5.6|5.6|5.6|5.8|5.6|5.6|5.6|5.6|5.6|5.6|5.6	1	11.97	11.97|11.97|11.97|11.97|11.97|11.97|11.97|11.97|11.97|11.97|11.97	30	30.1	17.8 kDa class I heat shock protein-like
1	Cucurbita maxima	3	1	1	4650000	XP_022992577.1	XP_022992577.1|XP_022938823.1|XP_023551251.1	0+91+10+240	0+91+10+240|0+91+10+240|0+91+10+240	2.9	2.9|2.9|2.9	1	11.75	11.75|11.75|11.75	31	31.1	adenosine kinase 2-like
3	Cucurbita maxima	3	1	3	1740000	XP_022983083.1	XP_022983083.1|XP_022935582.1|XP_023528901.1	0+71+16+158	0+71+16+158|0+71+16+158|0+71+16+158	6.5	6.5|6.5|6.5	1	11.71	11.71|11.71|11.71	32	32.1	uncharacterized protein LOC111481736
1	Cucurbita moschata	2	1	1	702000	XP_022929874.1	XP_022929874.1|XP_023549320.1	0+112+15+107	0+112+15+107|0+112+15+109	6.4	6.4|6.3	1	11.68	11.68|11.68	33	33.1	oil body-associated protein 1A-like
1	Cucurbita moschata	2	1	1	241000	XP_022935324.1	XP_022935324.1|XP_023527121.1	0+193+8+264	0+193+8+264|0+193+8+267	1.7	1.7|1.7	1	10.89	10.89|10.89	34	34.1	uncharacterized protein LOC111442246
1	Cucurbita maxima	3	1	1	5190000	XP_022999530.1	XP_022999530.1|XP_022946691.1|XP_023545701.1	0+37+13+166	0+37+13+166|0+37+13+166|0+37+13+166	6	6|6|6	1	10.81	10.81|10.81|10.81	35	35.1	pre-mRNA cleavage factor Im 25 kDa subunit 1-like
2	Cucurbita moschata	1	1	2	13100000	XP_022936763.1	XP_022936763.1|XP_022936764.1	0+22+8+345	0+22+8+345|0+22+8+345	2.1	2.1|2.1	1	10.73	10.73|10.73	36	36.1	uncharacterized protein LOC111443257
1	Cucurbita maxima	1	1	1	993000	XP_022978148.1	XP_022978148.1	0+274+10+216	0+274+10+216	2	2	1	10.53	10.53	37	37.1	serine/threonine-protein kinase STN8, chloroplastic
2	Cucurbita maxima	3	1	2	1250000	XP_022985515.1	XP_022985515.1|XP_022922817.1|XP_023552038.1	0+127+15	0+127+15|0+127+15|0+127+15	10.5	10.5|10.5|10.5	1	10.26	10.26|10.26|10.26	38	38.1	oleosin 1-like
1	Cucurbita maxima	3	1	1	702000	XP_022970889.1	XP_022970889.1|XP_022947224.1|XP_023534218.1	0+338+18+136	0+338+18+136|0+337+18+136|0+338+18+136	3.6	3.6|3.6|3.6	1	10.15	10.15|10.15|10.15	39	39.1	seed biotin-containing protein SBP65-like
2	Cucurbita maxima	3	1	2	4610000	XP_022984210.1	XP_022984210.1|XP_022922985.1|XP_023552551.1	0+95+10+527	0+95+10+527|0+95+10+528|0+95+10+528	1.5	1.5|1.5|1.5	1	9.93	9.93|9.93|9.93	40	40.1	probable inactive receptor kinase At2g26730
4	Cucurbita maxima	3	1	4	3170000	XP_022978321.1	XP_022978321.1|XP_022978323.1|XP_022949995.1|XP_022949996.1|XP_022949998.1|XP_023543342.1|XP_023544726.1	0+15+13+85	0+15+13+85|0+15+13+63|0+15+13+85|0+15+13+85|0+15+13+63|0+15+13+63|0+15+13+85	11.5	11.5|14.2|11.5|11.5|14.2|14.2|11.5	1	9.87	9.87|9.87|9.87|9.87|9.87|9.87|9.87	41	41.1	carrot ABA-induced in somatic embryos 3
1	Cucurbita maxima	3	1	1	1180000	XP_022968183.1	XP_022968183.1|XP_022968184.1|XP_022993277.1|XP_022945194.1|XP_022957563.1|XP_023539804.1|XP_023541990.1	0+638+7+136	0+638+7+136|0+638+7+136|0+638+7+136|0+638+7+136|0+634+7+136|0+638+7+136|0+638+7+136	0.8	0.8|0.8|0.8|0.8|0.9|0.8|0.8	1	9.83	9.83|9.83|9.83|9.83|9.83|9.83|9.83	42	42.1	glycosyltransferase family protein 64 protein C5-like
1	Cucurbita maxima	2	1	1	1190000	XP_022981228.1	XP_022981228.1|XP_023525765.1	0+108+21+333	0+108+21+333|0+108+21+333	4.5	4.5|4.5	1	9.62	9.62|9.62	43	43.1	uncharacterized protein LOC111480428
1	Cucurbita maxima	3	1	1	2580000	XP_022977433.1	XP_022977433.1|XP_022950160.1|XP_023543705.1	0+432+17+463	0+432+17+463|0+432+17+463|0+432+17+463	1.8	1.8|1.8|1.8	1	9.61	9.61|9.61|9.61	44	44.1	pre-mRNA-splicing factor SYF1
3	Cucurbita maxima	3	1	3	7920000	XP_022965891.1	XP_022965891.1|XP_022937591.1|XP_022937592.1|XP_022937593.1|XP_023522187.1|XP_023537184.1|XP_023537185.1|XP_023537187.1	0+194+11+55	0+194+11+55|0+194+11+55|0+194+11+55|0+194+11+55|0+83+11+56|0+194+11+55|0+194+11+55|0+194+11+55	4.2	4.2|4.2|4.2|4.2|7.3|4.2|4.2|4.2	1	9.58	9.58|9.58|9.58|9.58|9.58|9.58|9.58|9.58	45	45.1	uncharacterized protein LOC111465640
1	Cucurbita moschata	1	1	1	3960000	XP_022950091.1	XP_022950091.1	0+328+12+131	0+328+12+131	2.5	2.5	1	9.51	9.51	46	46.1	uncharacterized protein LOC111453278
1	Cucurbita maxima	3	1	1	12700000	XP_023006708.1	XP_023006708.1|XP_022956486.1|XP_023535012.1|XP_023535021.1|XP_023535029.1	0+179+17+7	0+179+17+7|0+178+17+7|0+180+17+7|0+180+17+7|0+180+17+7	8.3	8.3|8.4|8.3|8.3|8.3	1	9.51	9.51|9.51|9.51|9.51|9.51	47	47.1	uncharacterized protein LOC111499332
1	Cucurbita moschata	1	1	1	3720000	XP_022946598.1	XP_022946598.1	0+39+15+280	0+39+15+280	4.4	4.4	1	9.42	9.42	48	48.1	pectinesterase-like
1	Cucurbita maxima	3	1	1	318000	XP_023007354.1	XP_023007354.1|XP_022948214.1|XP_023532372.1	1+12+446	1+12+446|1+12+442|1+12+442	2.4	2.4|2.4|2.4	1	9.39	9.39|9.39|9.39	49	49.1	benzyl alcohol O-benzoyltransferase-like
1	Cucurbita moschata	2	1	1	427000	XP_022943788.1	XP_022943788.1|XP_022943789.1|XP_022943790.1|XP_023512274.1	0+48+14+438	0+48+14+438|0+41+14+438|0+48+14+409|0+5+14+366	2.8	2.8|2.8|2.9|3.6	1	9.37	9.37|9.37|9.37|9.37	50	50.1	aspartic proteinase NANA, chloroplast-like isoform X1
1	Cucurbita maxima	3	1	1	571000	XP_022986435.1	XP_022986435.1|XP_022944490.1|XP_022944491.1|XP_023513297.1	0+2319+15+1459	0+2319+15+1459|0+2319+15+1459|0+2319+15+1077|0+2319+15+1459	0.3	0.3|0.3|0.4|0.3	1	9.34	9.34|9.34|9.34|9.34	51	51.1	serine/threonine-protein kinase SMG1-like
1	Cucurbita pepo subsp. pepo	1	1	1	940000	XP_023526201.1	XP_023526201.1|XP_023526203.1	0+7+13+90	0+7+13+90|0+7+13+90	11.8	11.8|11.8	1	9.1	9.1|9.1	52	52.1	MLP-like protein 34
2	Cucurbita maxima	3	1	2	37200000	XP_022978895.1	XP_022978895.1|XP_023003854.1|XP_022926485.1|XP_022950590.1|XP_023517622.1|XP_023544117.1|XP_023544118.1	0+1552+10+2326	0+1552+10+2326|0+1552+10+2326|0+1552+10+2327|0+1552+10+2326|0+1552+10+2327|0+1556+10+2326|0+1552+10+2326	0.2	0.2|0.2|0.2|0.2|0.2|0.2|0.2	1	8.95	8.95|8.95|8.95|8.95|8.95|8.95|8.95	53	53.1	transcription-associated protein 1-like
1	Cucurbita maxima	1	1	1	970000	XP_023004202.1	XP_023004202.1|XP_023004203.1	0+61+12+936	0+61+12+936|0+41+12+936	1.1	1.1|1.2	1	8.87	8.87|8.87	54	54.1	pentatricopeptide repeat-containing protein At2g03880, mitochondrial-like isoform X1
1	Cucurbita maxima	3	1	1	4290000	XP_023004765.1	XP_023004765.1|XP_022959659.1|XP_023513512.1	0+275+16+184	0+275+16+184|0+275+16+187|0+275+16+187	3.3	3.3|3.3|3.3	1	8.71	8.71|8.71|8.71	55	55.1	transcription factor bHLH62-like
1	Cucurbita maxima	3	1	1	1730000	XP_022987716.1	XP_022987716.1|XP_022961051.1|XP_023515791.1	0+96+10+348	0+96+10+348|0+96+10+348|0+96+10+348	2.2	2.2|2.2|2.2	1	8.51	8.51|8.51|8.51	56	56.1	probable receptor-like protein kinase At5g20050
1	Cucurbita maxima	1	1	1	614000	XP_022971843.1	XP_022971843.1	0+226+21+71	0+226+21+71	6.6	6.6	1	8.25	8.25	57	57.1	low-temperature-induced 65 kDa protein-like
1	Cucurbita moschata	2	1	1	1270000	XP_022922990.1	XP_022922990.1|XP_022922991.1|XP_022922992.1|XP_023553034.1|XP_023553035.1|XP_023553036.1	0+178+13+447	0+178+13+447|0+178+13+443|0+178+13+312|0+178+13+447|0+178+13+443|0+178+13+339	2	2|2|2.5|2|2|2.4	1	8.19	8.19|8.19|8.19|8.19|8.19|8.19	58	58.1	WD repeat-containing protein 91 homolog isoform X1
2	Cucurbita maxima	3	1	2	13700000	XP_022975935.1	XP_022975935.1|XP_022936380.1|XP_023535181.1	0+822+15+173	0+822+15+173|0+822+15+169|0+822+15+173	1.4	1.4|1.4|1.4	1	8.19	8.19|8.19|8.19	59	59.1	protein FAM91A1-like
1	Cucurbita moschata	2	1	1	2530000	XP_022952890.1	XP_022952890.1|XP_022952891.1|XP_022952892.1|XP_022952893.1|XP_022952895.1|XP_023554461.1|XP_023554462.1|XP_023554463.1|XP_023554464.1|XP_023554465.1|XP_023554467.1|XP_023554468.1	0+140+13+318	0+140+13+318|0+140+13+318|0+140+13+318|0+140+13+318|0+140+13+318|0+140+13+318|0+140+13+318|0+140+13+318|0+140+13+318|0+140+13+318|0+140+13+318|0+140+13+318	2.7	2.7|2.7|2.7|2.7|2.7|2.7|2.7|2.7|2.7|2.7|2.7|2.7	1	7.98	7.98|7.98|7.98|7.98|7.98|7.98|7.98|7.98|7.98|7.98|7.98|7.98	60	60.1	probable protein phosphatase 2C 52
1	Cucurbita pepo subsp. pepo	1	1	1	2740000	XP_023516977.1	XP_023516977.1	0+515+9+83	0+515+9+83	1.4	1.4	1	7.78	7.78	61	61.1	zinc finger CCCH domain-containing protein 64 isoform X2
2	Cucurbita maxima	1	1	2	4990000	XP_022989859.1	XP_022989859.1	0+289+11+265	0+289+11+265	1.9	1.9	1	7.67	7.67	62	62.1	multicopper oxidase LPR2-like
1	Cucurbita pepo subsp. pepo	1	1	1	965000	XP_023519267.1	XP_023519267.1	0+202+9+7	0+202+9+7	4.1	4.1	1	7.58	7.58	63	63.1	ran-binding protein 1 homolog a-like
1	Cucurbita moschata	1	1	1	7730000	XP_022927514.1	XP_022927514.1|XP_022927515.1|XP_022927516.1	0+113+18+707	0+113+18+707|0+113+18+706|0+113+18+553	2.1	2.1|2.1|2.6	1	7.34	7.34|7.34|7.34	64	64.1	G-type lectin S-receptor-like serine/threonine-protein kinase At1g11300 isoform X1
1	Cucurbita moschata	1	1	1	932000	XP_022946890.1	XP_022946890.1	0+48+24+95	0+48+24+95	14.3	14.3	1	7.33	7.33	65	65.1	uncharacterized protein LOC111450831
1	Cucurbita maxima	3	1	1	11800000	XP_023004041.1	XP_023004041.1|XP_023004042.1|XP_023004043.1|XP_023004044.1|XP_023004045.1|XP_022926477.1|XP_022926478.1|XP_022926479.1|XP_022926480.1|XP_022926481.1|XP_022926482.1|XP_023517419.1|XP_023517421.1|XP_023517422.1|XP_023517423.1	0+283+10+141	0+283+10+141|0+238+10+141|0+207+10+141|0+207+10+141|0+207+10+141|0+283+10+132|0+238+10+132|0+207+10+132|0+207+10+132|0+207+10+132|0+207+10+132|0+283+10+132|0+238+10+132|0+207+10+132|0+207+10+132	2.3	2.3|2.5|2.7|2.7|2.7|2.3|2.6|2.8|2.8|2.8|2.8|2.3|2.6|2.8|2.8	1	7.27	7.27|7.27|7.27|7.27|7.27|7.27|7.27|7.27|7.27|7.27|7.27|7.27|7.27|7.27|7.27	66	66.1	putative E3 ubiquitin-protein ligase RING1a isoform X1
1	Cucurbita maxima	3	1	1	7410000	XP_022986277.1	XP_022986277.1|XP_022944082.1|XP_023513164.1|XP_023513165.1	0+207+17+333	0+207+17+333|0+213+17+335|0+213+17+337|0+213+17+323	3	3|3|2.9|3	1	7.21	7.21|7.21|7.21|7.21	67	67.1	QWRF motif-containing protein 3
1	Cucurbita maxima	3	1	1	3060000	XP_023005059.1	XP_023005059.1|XP_022960356.1|XP_023515165.1	0+185+24+78	0+185+24+78|0+185+24+78|0+185+24+78	8.3	8.3|8.3|8.3	1	7.13	7.13|7.13|7.13	68	68.1	xyloglucan endotransglucosylase/hydrolase 2
2	Cucurbita maxima	2	1	2	804000	XP_023003788.1	XP_023003788.1|XP_022926830.1	0+87+14+323	0+87+14+323|0+87+14+323	3.3	3.3|3.3	1	7.04	7.04|7.04	69	69.1	two-pore potassium channel 3-like
1	Cucurbita maxima	1	1	1	304000	XP_023006053.1	XP_023006053.1	0+342+11+169	0+342+11+169	2.1	2.1	1	7.03	7.03	70	70.1	uncharacterized protein LOC111498924
1	Cucurbita maxima	1	1	1	301000	XP_022970860.1	XP_022970860.1	0+191+12+86	0+191+12+86	4.1	4.1	1	6.84	6.84	71	71.1	transcription factor JUNGBRUNNEN 1-like
1	Cucurbita pepo subsp. pepo	1	1	1	914000	XP_023517955.1	XP_023517955.1|XP_023517956.1|XP_023517957.1	0+629+23+510	0+629+23+510|0+629+23+510|0+628+23+510	1.9	1.9|1.9|1.9	1	6.71	6.71|6.71|6.71	72	72.1	protein STICHEL-like 3 isoform X1
1	Cucurbita moschata	2	1	1	8970000	XP_022930317.1	XP_022930317.1|XP_023513950.1|XP_023513951.1	0+96+8+148	0+96+8+148|0+96+8+131|0+96+8+129	3.1	3.1|3.4|3.4	1	6.67	6.67|6.67|6.67	73	73.1	transcription factor bHLH92-like
1	Cucurbita maxima	1	1	1	542000	XP_022998915.1	XP_022998915.1|XP_022998924.1|XP_022998932.1|XP_022998941.1	0+188+10+1604	0+188+10+1604|0+188+10+1604|0+188+10+1592|0+188+10+1575	0.5	0.5|0.5|0.5|0.5	1	6.67	6.67|6.67|6.67|6.67	74	74.1	uncharacterized protein LOC111493434 isoform X1
1	Cucurbita pepo subsp. pepo	1	1	1	2080000	XP_023516378.1	XP_023516378.1	0+211+28+611	0+211+28+611	3.2	3.2	1	6.45	6.45	75	75.1	CRM-domain containing factor CFM3, chloroplastic/mitochondrial
1	Cucurbita maxima	3	1	1	442000	XP_022971212.1	XP_022971212.1|XP_022938045.1|XP_023538922.1	0+230+8	0+230+8|0+231+8|0+231+8	3.3	3.3|3.3|3.3	1	6.43	6.43|6.43|6.43	76	76.1	uncharacterized protein LOC111470003
1	Cucurbita maxima	3	1	1	1430000	XP_023001425.1	XP_023001425.1|XP_022927195.1|XP_023519183.1	0+378+11+81	0+378+11+81|0+378+11+81|0+370+11+81	2.3	2.3|2.3|2.3	1	6.16	6.16|6.16|6.16	77	77.1	uncharacterized protein LOC111495561
2	Cucurbita maxima	2	1	2	29900000	XP_023001352.1	XP_023001352.1|XP_023519471.1	0+9+22+61	0+9+22+61|0+9+22+61	23.9	23.9|23.9	1	6.14	6.14|6.14	78	78.1	uncharacterized protein LOC111495510
1	Cucurbita pepo subsp. pepo	1	1	1	2210000	XP_023550415.1	XP_023550415.1|XP_023550416.1	0+1163+19+28	0+1163+19+28|0+1121+19+28	1.5	1.5|1.6	1	6.13	6.13|6.13	79	79.1	phospholipid-transporting ATPase 1-like isoform X1
2	Cucurbita maxima	1	1	2	14500000	XP_022973743.1	XP_022973743.1|XP_022973744.1|XP_022973745.1	0+123+21+3190	0+123+21+3190|0+123+21+3188|0+123+21+3176	0.6	0.6|0.6|0.6	1	5.99	5.99|5.99|5.99	80	80.1	chromatin structure-remodeling complex protein SYD-like isoform X1
1	Cucurbita maxima	2	1	1	2640000	XP_022985463.1	XP_022985463.1|XP_023553225.1	0+269+19+888	0+269+19+888|0+269+19+888	1.6	1.6|1.6	1	5.7	5.7|5.7	81	81.1	structural maintenance of chromosomes protein 2-1-like
1	Cucurbita maxima	1	1	1	2180000	XP_022995912.1	XP_022995912.1	0+105+50+621	0+105+50+621	6.4	6.4	1	5.63	5.63	82	82.1	splicing factor 1-like isoform X2
1	Cucurbita pepo subsp. pepo	1	1	1	1120000	XP_023524681.1	XP_023524681.1|XP_023524682.1	0+127+51+290	0+127+51+290|0+127+51+289	10.8	10.8|10.9	1	5.6	5.6|5.6	83	83.1	dihydrolipoyllysine-residue acetyltransferase component 5 of pyruvate dehydrogenase complex, chloroplastic-like isoform X1
1	Cucurbita moschata	2	1	1	2850000	XP_022962219.1	XP_022962219.1|XP_023546949.1	0+120+25+96	0+120+25+96|0+120+25+96	10.3	10.3|10.3	1	5.56	5.56|5.56	84	84.1	transcription factor bHLH30-like
1	Cucurbita maxima	3	1	1	1940000	XP_022965406.1	XP_022965406.1|XP_022933701.1|XP_023529434.1	0+424+16+80	0+424+16+80|0+424+16+80|0+424+16+80	3	3|3|3	1	5.55	5.55|5.55|5.55	85	85.1	probable chlorophyll(ide) b reductase NYC1, chloroplastic
1	Cucurbita maxima	2	1	1	2760000	XP_022984385.1	XP_022984385.1|XP_022984386.1|XP_023552850.1|XP_023552851.1	0+110+28+239	0+110+28+239|0+110+28+239|0+110+28+239|0+110+28+239	7.4	7.4|7.4|7.4|7.4	1	5.15	5.15|5.15|5.15|5.15	86	86.1	thiosulfate/3-mercaptopyruvate sulfurtransferase 1, mitochondrial-like
1	Cucurbita maxima	1	1	1	2180000	XP_023002927.1	XP_023002927.1	0+979+48+24	0+979+48+24	4.5	4.5	1	5.01	5.01	87	87.1	tRNA wybutosine-synthesizing protein 2/3/4
1	Cucurbita maxima	1	1	1	4190000	XP_022979358.1	XP_022979358.1	0+227+76+448	0+227+76+448	10.1	10.1	1	5	5	88	88.1	long-chain-alcohol oxidase FAO1-like
1	Cucurbita maxima	3	1	1	802000	XP_022979476.1	XP_022979476.1|XP_022955623.1|XP_023526068.1	0+604+17+849	0+604+17+849|0+604+17+852|0+604+17+852	1.1	1.1|1.1|1.1	1	4.94	4.94|4.94|4.94	89	89.1	SAC3 family protein B
1	Cucurbita maxima	1	1	1	1910000	XP_023002200.1	XP_023002200.1|XP_023002201.1	0+886+26+76	0+886+26+76|0+723+26+76	2.6	2.6|3.1	1	4.84	4.84|4.84	90	90.1	uncharacterized protein LOC111496130 isoform X1
1	Cucurbita maxima	3	1	1	4870000	XP_022976751.1	XP_022976751.1|XP_022976752.1|XP_022936468.1|XP_023535027.1|XP_023535028.1|XP_023535030.1	0+171+20+354	0+171+20+354|0+171+20+354|0+77+20+354|0+171+20+354|0+171+20+354|0+171+20+354	3.6	3.6|3.6|4.4|3.6|3.6|3.6	1	4.75	4.75|4.75|4.75|4.75|4.75|4.75	91	91.1	pentatricopeptide repeat-containing protein At1g79080, chloroplastic-like
1	Cucurbita pepo subsp. pepo	1	1	1	286000	XP_023553029.1	XP_023553029.1|XP_023553030.1	0+385+12+29	0+385+12+29|0+242+12+29	2.8	2.8|4.2	1	4.74	4.74|4.74	92	92.1	phosphatidylinositol/phosphatidylcholine transfer protein SFH11 isoform X1
1	Cucurbita maxima	3	1	1	2830000	XP_022973669.1	XP_022973669.1|XP_022936878.1|XP_023540798.1	0+309+20+25	0+309+20+25|0+309+20+25|0+309+20+25	5.6	5.6|5.6|5.6	1	4.7	4.7|4.7|4.7	93	93.1	UPF0613 protein PB24D3.06c
1	Cucurbita maxima	3	1	1	4790000	XP_023002237.1	XP_023002237.1|XP_022951118.1|XP_023537097.1	0+534+24+250	0+534+24+250|0+534+24+250|0+534+24+250	2.9	2.9|2.9|2.9	1	4.66	4.66|4.66|4.66	94	94.1	V-type proton ATPase subunit a2-like
1	Cucurbita maxima	2	1	1	4480000	XP_022982610.1	XP_022982610.1|XP_022982611.1|XP_023528619.1|XP_023528620.1|XP_023528621.1|XP_023528622.1|XP_023528623.1	0+52+40+296	0+52+40+296|0+52+40+296|0+47+40+296|0+47+40+296|0+47+40+296|0+47+40+296|0+47+40+296	10.3	10.3|10.3|10.4|10.4|10.4|10.4|10.4	1	4.6	4.6|4.6|4.6|4.6|4.6|4.6|4.6	95	95.1	RHOMBOID-like protein 1
1	Cucurbita maxima	2	1	1	2050000	XP_023002839.1	XP_023002839.1|XP_023002840.1|XP_022951088.1|XP_022951089.1	0+514+43+37	0+514+43+37|0+513+43+37|0+514+43+37|0+513+43+37	7.2	7.2|7.2|7.2|7.2	1	4.33	4.33|4.33|4.33|4.33	96	96.1	65-kDa microtubule-associated protein 8-like isoform X1
1	Cucurbita moschata	1	1	1	2030000	XP_022937953.1	XP_022937953.1	0+119+13+128	0+119+13+128	5	5	1	4.3	4.3	97	97.1	transcription factor MYB86-like

## Sheet: Rapeseed oil
numSpectraProteinObserved	species	numSpeciesPresentR1	numPepsUniqueSpecies1	numSpectraSpecies1	totalIntensitySpecies1	accession_number	accession_numbers	coverage_map	coverage_maps	percentCoverage	percentCoverages	numPepsUnique	scoreUnique	scoresUnique	groupNum	subgroupNum	entry_name
6	Brassica napus	2	4	6	5170000	ACG69506.1	ACG69506.1|CDY20040.1|XP_013725019.1|sp|C3S7F1.1|OLES2_BRANA|XP_022565510.1|XP_013677557.1|XP_013710504.1	0+7+9+111+14+24+18+5	0+7+9+111+14+24+18+5|0+7+9+111+14+24+18+5|0+7+9+111+14+24+18+5|0+7+9+111+14+24+18+5|0+100+14+24+18+5|0+129+14+48|0+61+14+48	21.8	21.8|21.8|21.8|21.8|19.8|7.3|11.3	4	43.04	43.04|43.04|43.04|43.04|20.78|10|10	1	1.1	oleosin S2-2
3	Brassica napus	1	2	3	1770000	ACG69504.1	ACG69504.1|XP_013735634.1	0+120+9+15+9+40	0+120+9+15+9+40|0+120+9+15+9+40	9.3	9.3|9.3	2	25.09	25.09|25.09	2	2.1	oleosin S1-1
1	Brassica napus	2	1	1	981000	CAA40980.1	CAA40980.1|CDY18193.1|sp|P33522.1|CRU4_BRANA	0+314+8+91	0+314+8+91|0+358+8+91|0+366+8+91	1.9	1.9|1.7|1.7	1	15.31	15.31|15.31|15.31	3	3.1	cruciferin cru4 subunit, partial
3	Brassica napus	1	1	3	4740000	pir||S70337	pir||S70337	1+12	1+12	91.6	91.6	1	14.45	14.45	4	4.1	napin small chain S2 - Swedish turnip (fragment)
2	Brassica napus	1	1	2	3100000	CDY31462.1	CDY31462.1|XP_013682113.1	0+100+10+90	0+100+10+90|0+100+10+90	5	5|5	1	13.62	13.62|13.62	5	5.1	BnaC03g63620D
3	Brassica napus	3	1	3	6970000	AAN86249.1	AAN86249.1|CDY46659.1|XP_013705462.1|XP_013738180.1|AAB21101.1|pdb|1PNB|A|pdb|1SM7|A|prf||1803246A|sp|P24565.1|2SSI_BRANA	0+7+9+93	0+7+9+93|0+50+9+99|0+50+9+99|0+50+9+99|0+7+9+15|0+7+9+15|0+7+9+93|0+7+9+15|0+7+9+94	8.2	8.2|5.6|5.6|5.6|29|29|8.2|29|8.1	1	12.94	12.94|12.94|12.94|12.94|12.94|12.94|12.94|12.94|12.94	6	6.1	recombinant Ib pronapin precursor, partial
3	Brassica napus	2	1	3	2770000	AAA32989.1	AAA32989.1|AAK07609.1|CAA44042.1|CAE85277.1|CAE85322.1|CDY14237.1|CDY35196.1|CDY38381.1|XP_013656366.1|XP_013696793.1|XP_013734582.1|XP_013734592.1|XP_022554684.1|sp|P33525.1|CRU3_BRANA	0+326+10+170	0+326+10+170|0+309+10+170|0+329+10+170|0+329+10+170|0+329+10+170|0+314+10+169|0+309+10+170|0+295+10+170|0+314+10+169|0+329+10+170|0+309+10+170|0+309+10+170|0+316+10+169|0+329+10+170	1.9	1.9|2|1.9|1.9|1.9|2|2|2.1|2|1.9|2|2|2|1.9	1	11.65	11.65|11.65|11.65|11.65|11.65|11.65|11.65|11.65|11.65|11.65|11.65|11.65|11.65|11.65	7	7.1	cruciferin precursor, partial
1	Brassica napus	1	1	1	736000	XP_013710827.1	XP_013710827.1	0+18+8+181	0+18+8+181	3.8	3.8	1	9.19	9.19	8	8.1	uncharacterized protein LOC106414789
1	Brassica napus	1	1	1	639000	CDY13616.1	CDY13616.1|CDY46989.1|CDY46997.1|CDY50360.1|XP_013644847.1|XP_013644848.1|XP_013644849.1|XP_013644850.1|XP_013659353.1|XP_013725307.1	0+414+9+110	0+414+9+110|0+384+9+120|0+318+9+120|0+384+9+120|0+381+9+110|0+383+9+110|0+381+9+110|0+381+9+110|0+384+9+120|0+384+9+120	1.6	1.6|1.7|2|1.7|1.8|1.7|1.8|1.8|1.7|1.7	1	8.11	8.11|8.11|8.11|8.11|8.11|8.11|8.11|8.11|8.11|8.11	9	9.1	BnaA06g33070D
1	Brassica napus	1	1	1	3290000	XP_013703569.1	XP_013703569.1	0+251+10+346	0+251+10+346	1.6	1.6	1	7.77	7.77	10	10.1	myosin-10
1	Brassica napus	1	1	1	10500000	CDY19387.1	CDY19387.1|XP_013641222.1|XP_013696981.1|XP_013696982.1	0+762+7+377	0+762+7+377|0+762+7+398|0+762+7+394|0+762+7+394	0.6	0.6|0.5|0.6|0.6	1	7.14	7.14|7.14|7.14|7.14	11	11.1	BnaC05g08960D
2	Brassica napus	1	1	2	8420000	XP_013709124.1	XP_013709124.1	1+16+128	1+16+128	10.4	10.4	1	5.99	5.99	12	12.1	uncharacterized protein LOC106412769
1	Brassica napus	1	1	1	6850000	XP_013649643.1	XP_013649643.1|XP_013649644.1|XP_013649645.1|XP_013649646.1|XP_022544916.1|XP_022544918.1	0+642+15+421	0+642+15+421|0+642+15+421|0+642+15+421|0+642+15+421|0+642+15+421|0+642+15+421	1.3	1.3|1.3|1.3|1.3|1.3|1.3	1	5.94	5.94|5.94|5.94|5.94|5.94|5.94	13	13.1	uncharacterized protein LOC106354284
1	Brassica napus	1	1	1	3170000	XP_013659049.1	XP_013659049.1	0+302+9+204	0+302+9+204	1.7	1.7	1	5.88	5.88	14	14.1	uncharacterized protein LOC106363938
2	Brassica napus	1	1	2	1380000	CDY11708.1	CDY11708.1|XP_013699189.1	0+543+7+14	0+543+7+14|0+544+7+14	1.2	1.2|1.2	1	5.12	5.12|5.12	15	15.1	BnaC06g13160D
1	Brassica napus	1	1	1	5970000	CDY39463.1	CDY39463.1|XP_013674435.1	0+291+11+82	0+291+11+82|0+265+11+82	2.8	2.8|3	1	4.97	4.97|4.97	16	16.1	BnaC03g60730D
1	Brassica napus	1	1	1	978000	CDY20673.1	CDY20673.1|CDY31065.1|XP_013640972.1|XP_013640973.1|XP_013657718.1|XP_013696375.1|XP_013750840.1|XP_022576328.1	0+249+9+589	0+249+9+589|0+249+9+589|0+249+9+587|0+249+9+587|0+249+9+589|0+249+9+586|0+249+9+589|0+249+9+587	1	1|1|1|1|1|1|1|1	1	4.83	4.83|4.83|4.83|4.83|4.83|4.83|4.83|4.83	17	17.1	BnaC08g13850D
1	Brassica napus	1	1	1	1150000	XP_013749996.1	XP_013749996.1|XP_022549158.1|XP_022565084.1	0+276+13+402	0+276+13+402|0+276+13+503|0+276+13+67	1.8	1.8|1.6|3.6	1	4.38	4.38|4.38|4.38	18	18.1	uncharacterized protein LOC106452427
1	Brassica napus	1	1	1	1070000	XP_013732016.1	XP_013732016.1|XP_022554975.1	0+300+11+56	0+300+11+56|0+300+11+56	2.9	2.9|2.9	1	4.23	4.23|4.23	19	19.1	F-box/kelch-repeat protein At4g38940-like
1	Brassica napus	1	1	1	1100000	CDY10267.1	CDY10267.1|XP_013696776.1	0+312+6	0+312+6|0+312+6	1.8	1.8|1.8	1	4.13	4.13|4.13	20	20.1	BnaC05g05100D

## Sheet: Sesame oil
numSpectraProteinObserved	species	numSpeciesPresentR1	numPepsUniqueSpecies1	numSpectraSpecies1	totalIntensitySpecies1	accession_number	accession_numbers	coverage_map	coverage_maps	percentCoverage	percentCoverages	numPepsUnique	scoreUnique	scoresUnique	groupNum	subgroupNum	entry_name
90	Sesamum indicum	1	22	90	1270000000	XP_020549903.1	XP_020549903.1|ABB60055.1	0+22+10+12+27+6+45+16+43+11+13+2+29+28+14+1+12+2+8+10+21+5+82+5+20+32	0+22+10+12+27+6+45+16+43+11+13+2+29+28+14+1+12+2+8+10+21+5+82+5+20+32|0+22+10+12+27+6+45+16+43+11+13+2+10+47+14+1+12+2+8+10+21+5+20+19+43+5+20+25	68	68|60.9	22	421.56	421.56|374.21	1	1.1	legumin B-like
71	Sesamum indicum	2	17	71	1020000000	AAD42944.1	AAD42944.1|NP_001291336.1|sp|Q9XHP0.1|11S2_SESIN	0+47+27+24+20+7+9+14+41+12+37+17+16+49+82+18+22+17	0+47+27+24+20+7+9+14+41+12+37+17+16+49+82+18+22+17|0+47+27+24+20+7+9+14+41+12+37+17+16+49+82+18+22+17|0+47+27+24+20+7+9+14+41+12+37+17+16+49+82+18+22+17	55.3	55.3|55.3|55.3	17	332.9	332.9|332.9|332.9	2	2.1	11S globulin precursor
84	Sesamum indicum	1	17	84	1080000000	ABB60054.1	ABB60054.1|NP_001291327.1	0+31+12+2+13+5+27+6+49+21+21+14+19+97+17+3+16+10+20+13+36+18+15+7+14+5	0+31+12+2+13+5+27+6+49+21+21+14+19+97+17+3+16+10+20+13+36+18+15+7+14+5|0+31+12+2+13+5+27+6+49+21+21+14+19+97+17+3+16+10+20+13+36+18+15+7+14+5	52.7	52.7|52.7	17	304.4	304.4|304.4	3	3.1	11S globulin precursor isoform 3
60	Sesamum indicum	1	17	60	627000000	AAK15087.1	AAK15087.1|NP_001291328.1	0+62+27+6+18+2+16+66+23+46+16+17+10+10+16+10+20+21+42+5+15+14+7+28	0+62+27+6+18+2+16+66+23+46+16+17+10+10+16+10+20+21+42+5+15+14+7+28|0+62+27+6+18+2+16+66+23+46+16+17+10+10+16+10+20+21+42+5+15+14+7+28	42.2	42.2|42.2	17	301.98	301.98|301.98	4	4.1	11S globulin
27	Sesamum indicum	1	12	27	44500000	XP_011089873.1	XP_011089873.1	0+41+12+22+30+5+12+9+17+133+33+52+11+10+55+42	0+41+12+22+30+5+12+9+17+133+33+52+11+10+55+42	35.1	35.1	12	216.41	216.41	5	5.1	vicilin-like seed storage protein At2g28490
28	Sesamum indicum	1	9	28	66700000	AAK15089.1	AAK15089.1|NP_001291343.1	0+94+10+6+7+15+6+55+15+26+27+25+12+10+41+215+9+12	0+94+10+6+7+15+6+55+15+26+27+25+12+10+41+215+9+12|0+94+10+6+7+15+6+55+15+26+27+25+12+10+41+215+9+12	21.7	21.7|21.7	9	154.07	154.07|154.07	6	6.1	7S globulin
18	Sesamum indicum	1	8	18	18200000	XP_011090693.1	XP_011090693.1	0+290+10+13+12+10+10+17+17+22+11+38+13+14+10+73+18+48	0+290+10+13+12+10+10+17+17+22+11+38+13+14+10+73+18+48	16.1	16.1	8	137.38	137.38	7	7.1	vicilin-like antimicrobial peptides 2-2
15	Sesamum indicum	1	8	15	36900000	XP_011080043.1	XP_011080043.1	0+22+12+43+20+86+10+95+8+67+25+31+15+11+10+9	0+22+12+43+20+86+10+95+8+67+25+31+15+11+10+9	21.5	21.5	8	118.67	118.67	8	8.1	legumin B
9	Sesamum indicum	1	5	9	9200000	AAL09328.1	AAL09328.1|AAL13315.1|NP_001291322.1	0+92+11+98+11+39+11+62+22+2	0+92+11+98+11+39+11+62+22+2|0+92+11+98+11+39+11+62+22+2|0+92+11+98+11+39+11+62+22+2	15.8	15.8|15.8|15.8	5	82.77	82.77|82.77|82.77	9	9.1	steroleosin
11	Sesamum indicum	1	4	11	13600000	XP_011084893.1	XP_011084893.1|XP_011077537.1	0+15+25+8+13+14+12+4	0+15+25+8+13+14+12+4|0+15+25+72	54.9	54.9|22.3	4	69.33	69.33|30.67	10	10.1	em-like protein GEA6
10	Sesamum indicum	1	4	10	54700000	ABB60053.1	ABB60053.1|XP_011095337.1	0+50+9+27+7+24+10+6+11+6	0+50+9+27+7+24+10+6+11+6|0+50+9+27+7+24+10+6+11+6	24.6	24.6|24.6	4	68.82	68.82|68.82	11	11.1	2S albumin precursor isoform 3
8	Sesamum indicum	2	3	8	11100000	AAF13743.1	AAF13743.1|CAW35358.1|CAW44147.1|CBC01392.1|CBC09653.1|NP_001291323.1|sp|Q9SQ57.1|PXG_SESIN	0+12+20+121+12+8+14+58	0+12+20+121+12+8+14+58|0+12+20+121+12+8+14+58|0+12+20+121+12+8+14+58|0+12+20+121+12+8+14+58|0+12+20+121+12+8+14+58|0+12+20+121+12+8+14+58|0+12+20+121+12+8+14+58	18.7	18.7|18.7|18.7|18.7|18.7|18.7|18.7	3	55.71	55.71|55.71|55.71|55.71|55.71|55.71|55.71	12	12.1	caleosin
8	Sesamum indicum	1	3	8	8090000	XP_011100693.1	XP_011100693.1	0+67+17+57+11+19+25+28	0+67+17+57+11+19+25+28	23.6	23.6	3	51.02	51.02	13	13.1	1-Cys peroxiredoxin
4	Sesamum indicum	1	3	4	5450000	XP_011081635.1	XP_011081635.1	0+4+32+76+27+18	0+4+32+76+27+18	37.5	37.5	3	45.24	45.24	14	14.1	18.8 kDa class II heat shock protein
4	Sesamum indicum	1	2	4	2600000	XP_011074689.1	XP_011074689.1	0+5+26+141	0+5+26+141	15.1	15.1	2	40.47	40.47	15	15.1	peptidyl-prolyl cis-trans isomerase
4	Sesamum indicum	1	2	4	2750000	XP_011098036.1	XP_011098036.1	0+134+12+419+14+33	0+134+12+419+14+33	4.2	4.2	2	40.47	40.47	16	16.1	embryonic protein DC-8-like
7	Sesamum indicum	1	2	7	65200000	CAC84134.1	CAC84134.1|XP_011099732.1	0+89+12+8+17+17	0+89+12+8+17+17|0+89+12+8+17+17	20.2	20.2|20.2	2	39.41	39.41|39.41	17	17.1	precursor of thiamin-binding protein
11	Sesamum indicum	2	2	11	76100000	AAD42943.1	AAD42943.1|XP_011095387.1|sp|Q9XHP1.1|2SS1_SESIN	0+107+35+6	0+107+35+6|0+107+35+6|0+107+35+6	23.6	23.6|23.6|23.6	2	38.31	38.31|38.31|38.31	18	18.1	2S albumin precursor
2	Sesamum indicum	1	2	2	3510000	ACB55491.1	ACB55491.1|NP_001291332.1|XP_011090772.1	0+95+13+153+9+75	0+95+13+153+9+75|0+95+13+153+9+75|0+33+13+236	6.3	6.3|6.3|4.6	2	34.55	34.55|34.55|17.37	19	19.1	seed maturation-like protein precursor
6	Sesamum indicum	1	2	6	5600000	XP_011084154.1	XP_011084154.1	0+26+13+78+15+109	0+26+13+78+15+109	11.6	11.6	2	32.49	32.49	20	20.1	oil body-associated protein 1A
4	Sesamum indicum	1	2	4	3180000	XP_011096039.2	XP_011096039.2|XP_011086196.1|XP_011086197.1	0+243+31+258	0+243+31+258|0+272+10+279|0+221+10+279	5.8	5.8|1.7|1.9	2	31.76	31.76|13.73|13.73	21	21.1	aspartic proteinase-like
3	Sesamum indicum	1	2	3	2640000	XP_011081346.1	XP_011081346.1	0+113+9+2+10+5	0+113+9+2+10+5	13.6	13.6	2	31.05	31.05	22	22.1	oleosin 1-like
3	Sesamum indicum	1	2	3	16300000	AAG23840.1	AAG23840.1|NP_001292915.1	0+130+13+23	0+130+13+23|0+130+13+23	7.8	7.8|7.8	2	28.23	28.23|28.23	23	23.1	oleosin
4	Sesamum indicum	1	2	4	2360000	XP_011102222.1	XP_011102222.1	0+26+12+161+10+31	0+26+12+161+10+31	9.1	9.1	2	26.68	26.68	24	24.1	oil body-associated protein 2A-like
4	Sesamum indicum	1	2	4	1290000	XP_011072248.1	XP_011072248.1	0+49+11+66+11+19	0+49+11+66+11+19	14.1	14.1	2	24.79	24.79	25	25.1	late embryogenesis abundant protein Dc3
4	Sesamum indicum	1	2	4	1960000	XP_011078825.1	XP_011078825.1	0+5+11+133+9	0+5+11+133+9	12.6	12.6	2	24.33	24.33	26	26.1	11 kDa late embryogenesis abundant protein-like
2	Sesamum indicum	1	1	2	1930000	XP_011072095.1	XP_011072095.1	0+201+10+46	0+201+10+46	3.8	3.8	1	21.9	21.9	27	27.1	probable aquaporin TIP3-2
4	Sesamum indicum	1	1	4	47700000	AAK15088.1	AAK15088.1|ACI41244.1|ACI41245.1|XP_011094336.1	0+112+19+22	0+112+19+22|0+112+19+22|0+112+19+22|0+112+19+22	12.4	12.4|12.4|12.4|12.4	1	20.85	20.85|20.85|20.85|20.85	28	28.1	2S albumin
2	Sesamum indicum	1	1	2	2070000	XP_020554796.1	XP_020554796.1	0+59+14+712	0+59+14+712	1.7	1.7	1	20.58	20.58	29	29.1	vicilin-like seed storage protein At2g18540
1	Sesamum indicum	1	1	1	524000	XP_011098616.1	XP_011098616.1	0+56+12+46	0+56+12+46	10.5	10.5	1	19.83	19.83	30	30.1	non-specific lipid-transfer protein AP10
1	Sesamum indicum	1	1	1	636000	XP_011079384.1	XP_011079384.1	0+162+12+477	0+162+12+477	1.8	1.8	1	16.81	16.81	31	31.1	heat shock 70 kDa protein
1	Sesamum indicum	1	1	1	4170000	XP_011099997.1	XP_011099997.1	0+79+9+43	0+79+9+43	6.8	6.8	1	15.43	15.43	32	32.1	uncharacterized protein LOC105178254
4	Sesamum indicum	1	1	4	4690000	AFJ42572.1	AFJ42572.1|NP_001291329.1|XP_011073006.1|XP_011086733.1	0+236+14+87	0+236+14+87|0+236+14+87|0+236+14+87|0+236+14+87	4.1	4.1|4.1|4.1|4.1	1	13.93	13.93|13.93|13.93|13.93	33	33.1	glyceraldehyde 3-phosphate dehydrogenase
2	Sesamum indicum	1	1	2	1550000	XP_011097414.1	XP_011097414.1	0+119+10+37	0+119+10+37	6	6	1	13.74	13.74	34	34.1	oleosin 16.4 kDa
4	Sesamum indicum	1	1	4	2920000	AAD42942.1	AAD42942.1|ACH85187.1|ACH85188.1|XP_011076526.1	0+130+15	0+130+15|0+130+15|0+130+15|0+209+15	10.3	10.3|10.3|10.3|6.6	1	13.36	13.36|13.36|13.36|13.36	35	35.1	15 kDa oleosin
1	Sesamum indicum	1	1	1	6710000	XP_011087346.1	XP_011087346.1	0+17+8+574	0+17+8+574	1.3	1.3	1	11.88	11.88	36	36.1	DNAJ protein JJJ1 homolog
1	Sesamum indicum	1	1	1	246000	XP_011080223.1	XP_011080223.1|XP_011083139.1|XP_011086981.1|XP_011086997.1|XP_011087003.1|XP_020548943.1|XP_020550348.1	0+1726+9+213	0+1726+9+213|0+1726+9+213|0+1720+9+212|0+1720+9+212|0+1720+9+212|0+1720+9+212|0+1728+9+213	0.4	0.4|0.4|0.4|0.4|0.4|0.4|0.4	1	9.7	9.7|9.7|9.7|9.7|9.7|9.7|9.7	37	37.1	callose synthase 3
1	Sesamum indicum	1	1	1	491000	XP_011080509.1	XP_011080509.1|XP_011080510.1|XP_011080511.1	0+352+11+430	0+352+11+430|0+352+11+430|0+352+11+430	1.3	1.3|1.3|1.3	1	8.82	8.82|8.82|8.82	38	38.1	uncharacterized protein LOC105163756
1	Sesamum indicum	1	1	1	42800000	XP_011100500.1	XP_011100500.1	0+147+17+1079	0+147+17+1079	1.3	1.3	1	8.36	8.36	39	39.1	DExH-box ATP-dependent RNA helicase DExH6
1	Sesamum indicum	1	1	1	8920000	XP_011094001.1	XP_011094001.1	0+329+7+107	0+329+7+107	1.5	1.5	1	8.35	8.35	40	40.1	1-aminocyclopropane-1-carboxylate synthase 7
2	Sesamum indicum	1	1	2	34400000	XP_020547941.1	XP_020547941.1	0+248+9+2409	0+248+9+2409	0.3	0.3	1	8.21	8.21	41	41.1	small subunit processome component 20 homolog
1	Sesamum indicum	1	1	1	1140000	XP_011085186.1	XP_011085186.1|XP_011085188.1|XP_011085189.1|XP_011085190.1|XP_011085191.1|XP_011085192.1|XP_011085193.1|XP_011085194.1|XP_011085195.1|XP_020551803.1|XP_020551804.1|XP_020551805.1	0+393+9+547	0+393+9+547|0+393+9+547|0+393+9+547|0+393+9+547|0+393+9+547|0+393+9+547|0+393+9+547|0+393+9+547|0+393+9+357|0+393+9+547|0+393+9+547|0+393+9+547	0.9	0.9|0.9|0.9|0.9|0.9|0.9|0.9|0.9|1.1|0.9|0.9|0.9	1	7.92	7.92|7.92|7.92|7.92|7.92|7.92|7.92|7.92|7.92|7.92|7.92|7.92	42	42.1	small RNA 2'-O-methyltransferase isoform X1
1	Sesamum indicum	1	1	1	1680000	XP_011069391.1	XP_011069391.1	1+17+360	1+17+360	4.2	4.2	1	7.87	7.87	43	43.1	protochlorophyllide reductase-like, partial
1	Sesamum indicum	1	1	1	842000	XP_020553119.1	XP_020553119.1	0+292+30+75	0+292+30+75	7.5	7.5	1	7.8	7.8	44	44.1	glycine-rich cell wall structural protein
1	Sesamum indicum	1	1	1	544000	XP_011100144.1	XP_011100144.1	0+418+6+75	0+418+6+75	1.2	1.2	1	7.79	7.79	45	45.1	alkane hydroxylase MAH1-like
1	Sesamum indicum	1	1	1	1010000	XP_011095122.1	XP_011095122.1	0+249+11+64	0+249+11+64	3.3	3.3	1	7.56	7.56	46	46.1	uncharacterized protein LOC105174650
1	Sesamum indicum	1	1	1	1580000	XP_011077894.1	XP_011077894.1	0+607+12+124	0+607+12+124	1.6	1.6	1	7.45	7.45	47	47.1	putative pentatricopeptide repeat-containing protein At1g68930
3	Sesamum indicum	1	1	3	3970000	XP_011082361.1	XP_011082361.1	0+215+10	0+215+10	4.4	4.4	1	7.41	7.41	48	48.1	uncharacterized protein LOC105165155
2	Sesamum indicum	1	1	2	22600000	XP_011093723.1	XP_011093723.1|XP_020553456.1	0+554+12+321	0+554+12+321|0+521+12+321	1.3	1.3|1.4	1	7.25	7.25|7.25	49	49.1	potassium channel AKT1-like isoform X1
1	Sesamum indicum	1	1	1	1550000	XP_011077910.1	XP_011077910.1	0+406+17+107	0+406+17+107	3.2	3.2	1	7.08	7.08	50	50.1	uncharacterized protein LOC105161794
1	Sesamum indicum	1	1	1	4710000	XP_011086206.1	XP_011086206.1	0+61+13+138	0+61+13+138	6.1	6.1	1	6.73	6.73	51	51.1	chromatin remodeling protein EBS
1	Sesamum indicum	1	1	1	5770000	XP_011100858.1	XP_011100858.1	0+400+15+73	0+400+15+73	3	3	1	6.39	6.39	52	52.1	uncharacterized protein LOC105178970
2	Sesamum indicum	1	1	2	94800000	XP_011069625.1	XP_011069625.1	0+304+28+358	0+304+28+358	4	4	1	6.23	6.23	53	53.1	probable serine/threonine-protein kinase PIX7
1	Sesamum indicum	1	1	1	11900000	XP_011099752.1	XP_011099752.1|XP_011099753.1	0+495+6+351	0+495+6+351|0+379+6+351	0.7	0.7|0.8	1	6.21	6.21|6.21	54	54.1	probable inactive ATP-dependent zinc metalloprotease FTSHI 4, chloroplastic isoform X1
1	Sesamum indicum	1	1	1	2100000	XP_011096788.1	XP_011096788.1	0+48+19+720	0+48+19+720	2.4	2.4	1	6.16	6.16	55	55.1	exocyst complex component EXO84C
2	Sesamum indicum	1	1	2	45800000	XP_011089452.1	XP_011089452.1	0+90+18+181	0+90+18+181	6.2	6.2	1	6.09	6.09	56	56.1	uncharacterized protein LOC105170399
1	Sesamum indicum	1	1	1	1460000	XP_011091532.1	XP_011091532.1	0+64+25+239	0+64+25+239	7.6	7.6	1	5.97	5.97	57	57.1	uncharacterized protein LOC105171950
1	Sesamum indicum	1	1	1	593000	XP_011098339.2	XP_011098339.2|XP_011098340.1	0+500+8+40	0+500+8+40|0+505+8+37	1.4	1.4|1.4	1	5.94	5.94|5.94	58	58.1	beta-glucosidase 18
1	Sesamum indicum	1	1	1	1450000	XP_011082596.1	XP_011082596.1	0+15+23+512	0+15+23+512	4.1	4.1	1	5.73	5.73	59	59.1	histone acetyltransferase GCN5
1	Sesamum indicum	1	1	1	8300000	XP_011075730.1	XP_011075730.1|XP_020549112.1	0+438+41+2954	0+438+41+2954|0+53+41+2954	1.1	1.1|1.3	1	5.72	5.72|5.72	60	60.1	uncharacterized protein LOC105160162 isoform X1
1	Sesamum indicum	1	1	1	1340000	XP_011090628.1	XP_011090628.1	0+60+12+464	0+60+12+464	2.2	2.2	1	5.53	5.53	61	61.1	LOW QUALITY PROTEIN: cytochrome P450 78A7-like
1	Sesamum indicum	1	1	1	544000	XP_011095041.1	XP_011095041.1	0+337+7+227	0+337+7+227	1.2	1.2	1	5.48	5.48	62	62.1	dnaJ protein ERDJ3A
1	Sesamum indicum	1	1	1	1680000	XP_011087666.1	XP_011087666.1|XP_011092298.1	0+200+17+487	0+200+17+487|0+200+17+487	2.4	2.4|2.4	1	5.34	5.34|5.34	63	63.1	stromal 70 kDa heat shock-related protein, chloroplastic-like
1	Sesamum indicum	1	1	1	122000	XP_011085659.2	XP_011085659.2	0+275+41+67	0+275+41+67	10.7	10.7	1	5.18	5.18	64	64.1	GDSL esterase/lipase At2g23540
1	Sesamum indicum	1	1	1	16200000	XP_011072681.1	XP_011072681.1	0+751+16+25	0+751+16+25	2	2	1	5.07	5.07	65	65.1	subtilisin-like protease SBT1.5
1	Sesamum indicum	1	1	1	1600000	XP_011097893.1	XP_011097893.1|XP_011097899.1|XP_011097907.1	0+333+20+27	0+333+20+27|0+332+20+27|0+324+20+27	5.2	5.2|5.2|5.3	1	5.04	5.04|5.04|5.04	66	66.1	transcription factor TGA4 isoform X1
1	Sesamum indicum	1	1	1	1710000	XP_011081217.1	XP_011081217.1	0+90+19+641	0+90+19+641	2.5	2.5	1	4.64	4.64	67	67.1	oxysterol-binding protein-related protein 2A
1	Sesamum indicum	1	1	1	1900000	XP_011088051.1	XP_011088051.1|XP_011088053.1|XP_020551270.1	0+246+27+83	0+246+27+83|0+246+27+83|0+246+27+83	7.5	7.5|7.5|7.5	1	4.5	4.5|4.5|4.5	68	68.1	uncharacterized protein LOC105169363
1	Sesamum indicum	1	1	1	949000	XP_011093880.1	XP_011093880.1	0+497+21+209	0+497+21+209	2.8	2.8	1	4.39	4.39	69	69.1	UV-stimulated scaffold protein A homolog
1	Sesamum indicum	1	1	1	1760000	XP_011094151.1	XP_011094151.1	0+258+35+243	0+258+35+243	6.5	6.5	1	4.23	4.23	70	70.1	beta-glucosidase isoform X1
1	Sesamum indicum	1	1	1	2620000	XP_011079824.1	XP_011079824.1	0+82+31+204	0+82+31+204	9.7	9.7	1	4.05	4.05	71	71.1	adenylate isopentenyltransferase 3, chloroplastic

[truncated: 1 more sheets: Sunflower oil]
