# Supplementary material for: Identification of species-specific peptide markers in cold-pressed oils
Source: Sci Rep. 2020 Nov 17;10:19971. doi: 10.1038/s41598-020-76944-z (PMC7672054; doi:10.1038/s41598-020-76944-z)
Supplement: Supplementary file 2 — Supplementary Information. [file 41598_2020_76944_MOESM2_ESM.xlsx]

## Sheet: Title page
Identification of species-specific peptide markers in cold-pressed oils
Klaudia Kotecka-Majchrzak1, Agata Sumara2, Emilia Fornal2, and Magdalena Montowska1,*
1Department of Meat Technology, Poznan University of Life Sciences, Wojska Polskiego 31, Poznan 60-624, Poland
2Department of Pathophysiology, Medical University of Lublin, Jaczewskiego 8b, Lublin 20-090, Poland
*email: magdalena.montowska@gmail.com, magdalena.montowska@up.poznan.pl

## Sheet:  Coconut oil
num_Spectra	z	parent_m_over_z	delta_parent_mass	delta_ppm	totalIntensity	score	deltaForwardReverseScore	percent_scored_peak_intensity	retentionTimeMin	chromatographicPeakWidthSec	Sequence	numColumnsSequenceObserved	numSpectraSequenceObserved	bestScore	bestDeltaForwardReverseScore	best_parent_m_over_z	best_matched_parent_mass	best_delta_parent_mass	previous_aa	sequence	next_aa	species	speciesMulti	accession_number	accession_numbers	peptide_num	protein_group_num	protein_score	entry_name
2	2	545.285	0.0101	9.2	1440000	12.4	12.4	68.1	2.43	11	AAIKEESEGR	1	2	12.4	12.4	545.285	1089.55	0.0101	(K)	AAIKEESEGR	(L)	Cocos nucifera	Cocos nucifera	AYJ72172.1	AYJ72172.1	1	1.1	237.46	glyceraldehyde-3-phosphate dehydrogenase
5	2	717.889	0.0126	8.8	20100000	12.76	12.76	77.2	18.25	12	AASFNIIPSSTGAAK	2	9	15.3	15.3	717.889	1434.76	0.0112	(R)	AASFNIIPSSTGAAK	(A)	Cocos nucifera	Cocos nucifera	AYJ72172.1	AYJ72172.1|AFI57843.1	2	1.1	237.46	glyceraldehyde-3-phosphate dehydrogenase
3	2	867.919	0.0147	8.5	8740000	20.92	20.92	95.1	19.02	11	DAPMFVVGVNEHEYK	2	4	20.92	20.92	867.919	1734.82	0.0147	(K)	DAPMFVVGVNEHEYK	(S)	Cocos nucifera	Cocos nucifera	AYJ72172.1	AYJ72172.1	3	1.1	237.46	glyceraldehyde-3-phosphate dehydrogenase
4	2	1024.06	0.0142	6.9	27100000	14.14	14.14	57.3	33.63	12	FGIIEGLMTTVHSITATQK	2	8	15.23	15.23	1024.06	2047.09	0.014	(K)	FGIIEGLMTTVHSITATQK	(T)	Cocos nucifera	Cocos nucifera	AYJ72172.1	AYJ72172.1	4	1.1	237.46	glyceraldehyde-3-phosphate dehydrogenase
2	2	1100.05	0.0158	7.2	13100000	24.62	24.62	93.2	35.83	12	GILGYIEEDLVSTDFIGDSR	2	5	24.62	24.62	1100.05	2199.08	0.0158	(K)	GILGYIEEDLVSTDFIGDSR	(S)	Cocos nucifera	Cocos nucifera	AYJ72172.1	AYJ72172.1	5	1.1	237.46	glyceraldehyde-3-phosphate dehydrogenase
1	2	873.406	0.0128	7.3	4750000	26.87	26.87	96.3	23.23	11	LVAWYDNEWGYSSR	2	2	28.25	28.25	873.405	1745.79	0.0105	(K)	LVAWYDNEWGYSSR	(V)	Cocos nucifera	Cocos nucifera	AYJ72172.1	AYJ72172.1	6	1.1	237.46	glyceraldehyde-3-phosphate dehydrogenase
4	2	1377.65	0.0115	4.2	11300000	23.84	23.84	95.9	30.75	10	NPEEIPWGETGAEYVVESTGVFTDK	2	7	23.84	23.84	1377.65	2754.28	0.0115	(R)	NPEEIPWGETGAEYVVESTGVFTDK	(E)	Cocos nucifera	Cocos nucifera	AYJ72172.1	AYJ72172.1|AFI57843.1	7	1.1	237.46	glyceraldehyde-3-phosphate dehydrogenase
1	3	1004.48	0.0227	7.6	3050000	20.82	20.82	95.4	28.75	11	NPEEIPWGETGAEYVVESTGVFTDKEK	2	2	20.82	20.82	1004.48	3011.42	0.0227	(R)	NPEEIPWGETGAEYVVESTGVFTDKEK	(A)	Cocos nucifera	Cocos nucifera	AYJ72172.1	AYJ72172.1	8	1.1	237.46	glyceraldehyde-3-phosphate dehydrogenase
2	2	1125.55	0.0126	5.6	2100000	25.3	25.3	94.8	22.13	9	SDIDIVSNASCTTNCLAPLAK	2	5	25.3	25.3	1125.55	2250.07	0.0126	(K)	SDIDIVSNASCTTNCLAPLAK	(V)	Cocos nucifera	Cocos nucifera	AYJ72172.1	AYJ72172.1	9	1.1	237.46	glyceraldehyde-3-phosphate dehydrogenase
1	2	395.704	0.0075	9.5	5490000	7.33	7.41	66.6	2.25	8	TVDGPSSK	1	1	7.33	7.41	395.704	790.394	0.0075	(K)	TVDGPSSK	(D)	Cocos nucifera	Cocos nucifera	AYJ72172.1	AYJ72172.1	10	1.1	237.46	glyceraldehyde-3-phosphate dehydrogenase
2	3	1066.53	0.022	6.9	10400000	19.81	19.81	94.9	37.78	11	VALQSSDIELVAVNDPFISTDYMTYMFK	2	5	22.21	22.21	1066.53	3197.54	0.0195	(R)	VALQSSDIELVAVNDPFISTDYMTYMFK	(Y)	Cocos nucifera	Cocos nucifera	AYJ72172.1	AYJ72172.1	11	1.1	237.46	glyceraldehyde-3-phosphate dehydrogenase
4	2	749.935	0.0145	9.7	32900000	18.7	18.7	93	25.03	9	VPTVDVSVVDLTVR	2	7	21.24	21.24	749.933	1498.85	0.0117	(R)	VPTVDVSVVDLTVR	(I)	Cocos nucifera	Cocos nucifera	AYJ72172.1	AYJ72172.1|AFI57843.1	12	1.1	237.46	glyceraldehyde-3-phosphate dehydrogenase
2	2	635.333	0.0118	9.3	22800000	20.58	20.58	94.1	20.45	10	AGSEGFQFVSIK	2	5	20.58	20.58	635.333	1269.65	0.0118	(R)	AGSEGFQFVSIK	(T)	Cocos nucifera	Cocos nucifera	AKS26849.1	AKS26849.1	1	2.1	234.02	11S globulin isoform 2
2	2	615.843	0.0108	8.8	1420000	9.29	9.29	58.2	10.98	10	EESIKENILR	1	2	9.29	9.29	615.843	1230.67	0.0108	(R)	EESIKENILR	(G)	Cocos nucifera	Cocos nucifera	AKS26849.1	AKS26849.1	2	2.1	234.02	11S globulin isoform 2
1	2	561.78	0.0106	9.5	1430000	19.52	19.52	88.5	15.23	9	GETVFDGELR	1	1	19.52	19.52	561.78	1122.54	0.0106	(K)	GETVFDGELR	(R)	Cocos nucifera	UNREADABLE|Cocos nucifera	AKS26849.1	pdb|5XTY|A|ASQ40963.1|AKS26849.1|AKS26848.1	3	2.1	234.02	11S globulin isoform 2
1	2	991.513	0.0134	6.8	3440000	18.78	18.78	91.7	40.52	12	GFGTELLAAAFGIDMELAR	2	3	21.38	21.38	991.511	1982.01	0.0093	(R)	GFGTELLAAAFGIDMELAR	(K)	Cocos nucifera	Cocos nucifera	AKS26849.1	AKS26849.1	4	2.1	234.02	11S globulin isoform 2
1	2	628.351	0.012	9.5	17800000	15.07	15.07	88.9	20.82	12	GLLLPSMSNAPR	1	1	15.07	15.07	628.351	1255.68	0.012	(R)	GLLLPSMSNAPR	(L)	Cocos nucifera	UNREADABLE|Cocos nucifera	AKS26849.1	pdb|5WPW|A|ASQ40963.1|AKS26849.1|AKS26848.1	5	2.1	234.02	11S globulin isoform 2
1	2	713.336	0.0138	9.7	6930000	23.58	23.58	94.7	19.72	17	GMPEEVLMNSYR	2	2	23.58	23.58	713.336	1425.65	0.0138	(R)	GMPEEVLMNSYR	(I)	Cocos nucifera	Cocos nucifera	AKS26849.1	AKS26849.1	6	2.1	234.02	11S globulin isoform 2
2	3	714.344	0.0208	9.7	5770000	18.62	18.62	83.8	27.08	9	GMVGLVMPGCPETFQSFQR	2	4	18.62	18.62	714.344	2141	0.0208	(R)	GMVGLVMPGCPETFQSFQR	(S)	Cocos nucifera	Cocos nucifera	AKS26849.1	AKS26849.1	7	2.1	234.02	11S globulin isoform 2
1	2	856.996	0.0151	8.8	10600000	13.2	13.2	86.4	25.75	10	GQLLIVPQNYAVLER	2	2	14.63	14.63	856.995	1712.97	0.0127	(R)	GQLLIVPQNYAVLER	(A)	Cocos nucifera	Cocos nucifera	AKS26849.1	AKS26849.1	8	2.1	234.02	11S globulin isoform 2
4	3	698.021	0.019	9.1	9300000	15.37	15.37	80.2	14.65	10	GRVEVADDKGETVFDGELR	1	4	15.37	15.37	698.021	2092.03	0.019	(R)	GRVEVADDKGETVFDGELR	(R)	Cocos nucifera	Cocos nucifera	AKS26849.1	AKS26849.1	9	2.1	234.02	11S globulin isoform 2
1	2	520.801	0.01	9.6	1390000	9.02	9.02	81.7	4.03	10	IKQNIGDPR	1	1	9.02	9.02	520.801	1040.58	0.01	(K)	IKQNIGDPR	(R)	Cocos nucifera	UNREADABLE|Cocos nucifera	AKS26849.1	sp|A0A222NNM9.1|COS1_COCNU|ASQ40963.1|AKS26849.1|AKS26848.1	10	2.1	234.02	11S globulin isoform 2
4	2	749.461	0.0142	9.5	7380000	8.42	8.42	59.8	19.38	14	ITTLNSEKLPILR	2	7	12.55	12.55	749.459	1497.9	0.0101	(R)	ITTLNSEKLPILR	(F)	Cocos nucifera	UNREADABLE|Cocos nucifera	AKS26849.1	sp|A0A222NNM9.1|COS1_COCNU|pdb|5XTY|B|ASQ40963.1|AKS26849.1|AKS26848.1	11	2.1	234.02	11S globulin isoform 2
1	3	623.701	0.0186	9.9	1070000	14.88	14.88	86.4	22.68	10	RGQLLIVPQNYAVLER	1	1	14.88	14.88	623.701	1869.07	0.0186	(R)	RGQLLIVPQNYAVLER	(A)	Cocos nucifera	Cocos nucifera	AKS26849.1	AKS26849.1	12	2.1	234.02	11S globulin isoform 2
1	2	1018.44	0.0133	6.5	3310000	23.24	23.24	95.3	21.43	10	SEAGITDYFDEDNEQFR	2	3	23.24	23.24	1018.44	2035.85	0.0133	(R)	SEAGITDYFDEDNEQFR	(C)	Cocos nucifera	Cocos nucifera	AKS26849.1	AKS26849.1	13	2.1	234.02	11S globulin isoform 2
4	2	939.964	0.0135	7.2	11200000	15.97	15.97	78.3	16.45	15	VEVADDKGETVFDGELR	2	6	16.29	16.29	939.962	1878.91	0.0085	(R)	VEVADDKGETVFDGELR	(R)	Cocos nucifera	Cocos nucifera	AKS26849.1	AKS26849.1	14	2.1	234.02	11S globulin isoform 2
2	2	618.341	0.0109	8.8	11900000	21	21	92.2	19.83	10	AGSEGFQLVSIK	1	2	21	21	618.341	1235.66	0.0109	(R)	AGSEGFQLVSIK	(T)	Cocos nucifera	UNREADABLE|Cocos nucifera	ASQ40963.1	sp|A0A222NNM9.1|COS1_COCNU|pdb|5WPW|B|ASQ40963.1	1	2.2	202.8	cocosin
2	2	579.832	0.01	8.6	2200000	10.49	10.49	60.2	9.93	17	EGSIKENILR	2	4	12.51	12.51	579.833	1158.65	0.0112	(R)	EGSIKENILR	(G)	Cocos nucifera	UNREADABLE|Cocos nucifera	ASQ40963.1	pdb|5XTY|B|ASQ40963.1|AKS26848.1	2	2.2	202.8	cocosin
1	2	561.78	0.0106	9.5	1430000	19.52	19.52	88.5	15.23	9	GETVFDGELR	1	1	19.52	19.52	561.78	1122.54	0.0106	(R)	GETVFDGELR	(Q)	Cocos nucifera	UNREADABLE|Cocos nucifera	ASQ40963.1	pdb|5XTY|A|ASQ40963.1|AKS26849.1|AKS26848.1	3	2.2	202.8	cocosin
1	2	999.019	0.0142	7.1	5310000	15.87	15.87	80.8	36.37	7	GFSTELLAAAFGVNMELAR	2	2	18.94	18.94	999.018	1997.02	0.0125	(R)	GFSTELLAAAFGVNMELAR	(K)	Cocos nucifera	UNREADABLE|Cocos nucifera	ASQ40963.1	sp|A0A222NNM9.1|COS1_COCNU|pdb|5XTY|B|ASQ40963.1|AKS26848.1	4	2.2	202.8	cocosin
1	2	1062.03	0.0147	6.9	11100000	15.57	15.57	86.3	28.15	11	GIVGLVMPGCPETFQSFQR	2	2	17.82	17.82	1062.03	2123.04	0.0124	(R)	GIVGLVMPGCPETFQSFQR	(S)	Cocos nucifera	UNREADABLE|Cocos nucifera	ASQ40963.1	sp|A0A222NNM9.1|COS1_COCNU|pdb|5XTY|B|ASQ40963.1|AKS26848.1	5	2.2	202.8	cocosin
1	2	628.351	0.012	9.5	17800000	15.07	15.07	88.9	20.82	12	GLLLPSMSNAPR	1	1	15.07	15.07	628.351	1255.68	0.012	(R)	GLLLPSMSNAPR	(L)	Cocos nucifera	UNREADABLE|Cocos nucifera	ASQ40963.1	pdb|5WPW|A|ASQ40963.1|AKS26849.1|AKS26848.1	6	2.2	202.8	cocosin
1	2	698.348	0.013	9.3	10100000	19.72	19.72	92.8	23.98	14	GMPVEVLMNSYR	2	2	19.72	19.72	698.348	1395.68	0.013	(R)	GMPVEVLMNSYR	(L)	Cocos nucifera	UNREADABLE|Cocos nucifera	ASQ40963.1	sp|A0A222NNM9.1|COS1_COCNU|pdb|5XTY|B|ASQ40963.1|AKS26848.1	7	2.2	202.8	cocosin
3	3	707.357	0.0208	9.8	3590000	6.89	6.89	61	14.93	11	GRVEVADDRGETVFDGELR	1	3	6.89	6.89	707.357	2120.04	0.0208	(R)	GRVEVADDRGETVFDGELR	(Q)	Cocos nucifera	UNREADABLE|Cocos nucifera	ASQ40963.1	sp|A0A222NNM9.1|COS1_COCNU|pdb|5XTY|B|ASQ40963.1|AKS26848.1	8	2.2	202.8	cocosin
1	2	520.801	0.01	9.6	1390000	9.02	9.02	81.7	4.03	10	IKQNIGDPR	1	1	9.02	9.02	520.801	1040.58	0.01	(K)	IKQNIGDPR	(R)	Cocos nucifera	UNREADABLE|Cocos nucifera	ASQ40963.1	sp|A0A222NNM9.1|COS1_COCNU|ASQ40963.1|AKS26849.1|AKS26848.1	9	2.2	202.8	cocosin
4	2	749.461	0.0142	9.5	7380000	8.42	8.42	59.8	19.38	14	ITTLNSEKLPILR	2	7	12.55	12.55	749.459	1497.9	0.0101	(R)	ITTLNSEKLPILR	(F)	Cocos nucifera	UNREADABLE|Cocos nucifera	ASQ40963.1	sp|A0A222NNM9.1|COS1_COCNU|pdb|5XTY|B|ASQ40963.1|AKS26849.1|AKS26848.1	10	2.2	202.8	cocosin
3	2	929.013	0.0144	7.7	10600000	15.01	15.01	94.1	29.65	10	QGQLLIVPQNFAMLER	2	4	15.01	15.01	929.013	1857.01	0.0144	(R)	QGQLLIVPQNFAMLER	(A)	Cocos nucifera	UNREADABLE|Cocos nucifera	ASQ40963.1	sp|A0A222NNM9.1|COS1_COCNU|pdb|5XTY|B|ASQ40963.1	11	2.2	202.8	cocosin
3	2	1011.43	0.0172	8.5	11300000	21.3	21.3	88	19.43	10	SEAGVTDYFDEDNEQFR	2	5	24.37	24.37	1011.43	2021.84	0.0111	(R)	SEAGVTDYFDEDNEQFR	(C)	Cocos nucifera	UNREADABLE|Cocos nucifera	ASQ40963.1	sp|A0A222NNM9.1|COS1_COCNU|pdb|5XTY|B|ASQ40963.1|AKS26848.1	12	2.2	202.8	cocosin
1	2	953.965	0.0091	4.8	1430000	9.07	9.07	65.6	16.72	11	VEVADDRGETVFDGELR	2	3	10.38	10.38	953.965	1906.91	0.0085	(R)	VEVADDRGETVFDGELR	(Q)	Cocos nucifera	UNREADABLE|Cocos nucifera	ASQ40963.1	sp|A0A222NNM9.1|COS1_COCNU|pdb|5XTY|B|ASQ40963.1|AKS26848.1	13	2.2	202.8	cocosin
1	2	513.314	0.0098	9.5	556000	16.54	14.99	91	14.55	10	IGGIGTVPVGR	1	1	16.54	14.99	513.314	1025.61	0.0098	(K)	IGGIGTVPVGR	(V)	Cocos nucifera	Cocos nucifera	AYJ72170.1	AYJ72170.1	1	3.1	27.95	elongation factor 1-alpha
1	2	488.284	0.0096	9.9	914000	11.41	7.64	76	15.45	11	LPLQDVYK	1	1	11.41	7.64	488.284	975.551	0.0096	(R)	LPLQDVYK	(I)	Cocos nucifera	Cocos nucifera	AYJ72170.1	AYJ72170.1	2	3.1	27.95	elongation factor 1-alpha
2	2	599.32	0.0112	9.4	3040000	16.77	16.77	78.7	10.67	14	VPGAEQLEQAR	2	4	16.77	16.77	599.32	1197.62	0.0112	(R)	VPGAEQLEQAR	(A)	Cocos nucifera	Cocos nucifera	ACH91013.1	AQT25674.1|ACH91013.1	1	4.1	16.77	oleosin isoform OLE500c, partial
2	2	477.284	0.009	9.4	2920000	16.59	16.59	76.6	3.92	9	LATSHAVVR	1	2	16.59	16.59	477.284	953.553	0.009	(R)	LATSHAVVR	(G)	Cocos nucifera	Cocos nucifera	AQT25673.1	AQT25673.1	1	5.1	16.59	oleosin isoform 500a
1	3	652.032	0.0165	8.5	849000	11.46	11.46	64.1	19.03	12	VAPEEHPVLLTEAPLNPK	1	1	11.46	11.46	652.032	1954.06	0.0165	(R)	VAPEEHPVLLTEAPLNPK	(A)	Cocos nucifera	Cocos nucifera	CAM82973.1	CAM82973.1	1	6.1	11.46	actin, partial
1	2	474.231	0.0006	0.7	860000	5.12	5.12	51.1	1.43	5	EATQGTQGR	2	3	10.97	10.97	474.235	947.454	0.0081	(K)	EATQGTQGR	(T)	Cocos nucifera	Cocos nucifera	AZZ09171.1	AZZ09171.1	1	7.1	10.97	oleosin
1	2	472.287	-0.0025	-2.7	488000	5.63	5.63	67.1	17.93	9	AVVNSKVAR	2	2	8.34	7.42	472.286	943.568	-0.0026	(R)	AVVNSKVAR	(K)	Cocos nucifera	Cocos nucifera	AMP82001.1	ARI45600.1|AMP82001.1	1	8.1	8.34	gibberellin 20-oxidase 1
1	2	490.821	0.0097	9.9	482000	7.14	7.14	66.1	7.3	8	VRPAPITVK	1	1	7.14	7.14	490.821	980.625	0.0097	(R)	VRPAPITVK	(Y)	Cocos nucifera	UNREADABLE|Cocos nucifera	AAC49119.1	sp|Q42670.1|PLSC_COCNU|AAC49119.1	1	9.1	7.14	lysophosphatidic acid acyltransferase
1	2	488.285	0.0001	0.1	1050000	7.12	7.12	56.8	15.43	11	IGLFGGAGVGK	1	1	7.12	7.12	488.285	975.562	0.0001	(K)	IGLFGGAGVGK	(T)	Cocos nucifera	UNREADABLE|Cocos nucifera	AAK14705.1	sp|Q7HHW4.1|ATPB_COCNU|AOX12900.1|AAK14705.1|YP_008578292.1|AGS43473.1	1	10.1	7.12	ATP synthase beta subunit (chloroplast)
1	2	460.246	0.0003	0.3	693000	6.31	6.31	84.3	5.8	9	TLDSLQSR	2	2	7.02	7.02	460.245	919.484	-0.0011	(K)	TLDSLQSR	(L)	Cocos nucifera	Cocos nucifera	AJG44304.1	AJG44304.1	1	11.1	7.02	NBS-LRR resistance protein RGC121, partial
1	2	367.214	0.0003	0.5	1050000	6.37	6.37	84.2	4.8	11	ISEKTR	2	2	6.37	6.37	367.214	733.42	0.0003	(K)	ISEKTR	(H)	Cocos nucifera	Cocos nucifera	AGT55551.1	AGT55551.1	1	12.1	6.37	NBS-LRR type resistance protein, partial
1	2	408.75	-0.001	-1.2	1450000	4.42	3.7	68.9	7.75	8	IVGLTASR	1	1	4.42	3.7	408.75	816.494	-0.001	(R)	IVGLTASR	(L)	Cocos nucifera	Cocos nucifera	ALF95905.1	ALF95905.1	1	13.1	4.42	serine-threonine kinase STK9

## Sheet: Evening primrose
num_Spectra	z	parent_m_over_z	delta_parent_mass	delta_ppm	totalIntensity	score	deltaForwardReverseScore	percent_scored_peak_intensity	retentionTimeMin	chromatographicPeakWidthSec	Sequence	numColumnsSequenceObserved	numSpectraSequenceObserved	bestScore	bestDeltaForwardReverseScore	best_parent_m_over_z	best_matched_parent_mass	best_delta_parent_mass	previous_aa	sequence	next_aa	species	speciesMulti	accession_number	accession_numbers	peptide_num	protein_group_num	protein_score	entry_name
1	2	631.366	0.0095	7.5	863000	15.2	15.2	85.2	34.43	9	DITLGFVDLLR	1	1	15.2	15.2	631.366	1261.72	0.0095	(R)	DITLGFVDLLR	(D)	Oenothera hartwegii		AAO31550.1	AAO31550.1|AAO31551.1|AAO31552.1|AAO31553.1|AAO31554.1|ABW98687.1|ABW98855.1|ABX10020.1|ABX10104.1|AEK34306.1|AEK34308.1|AEK34309.1|AFX88410.1|AIA24624.1|AIA24625.1|AIA24626.1|AIA24627.1|AIA24628.1|AIS67760.1|AKG25256.1|AKG48933.1|AKG49099.1|ALR85982.1|ALR86066.1|ALR86150.1|ALR86234.1|ALR86318.1|ALR86402.1|ALR86486.1|ALR86570.1|ALR86654.1|AMC32001.1|AMC32006.1|ANC48951.1|ANC49035.1|ANG44290.1|ANI…	1	1.1	15.2	ribulose-1,5-bisphosphate carboxylase/oxygenase large subunit, partial
2	3	705.011	-0.0136	-6.4	11400000	3.7	3.7	46.4	19.07	10	GGSLESPFYEISERSNKGR	2	4	3.7	3.7	705.011	2113.03	-0.0136	(R)	GGSLESPFYEISERSNKGR	(M)	Oenothera argillicola		ABW98703.1	ABW98703.1|ABW98871.1|ABX10036.1|ABX10120.1|ALR85998.1|ALR86082.1|ALR86166.1|ALR86250.1|ALR86334.1|ALR86418.1|ALR86502.1|ALR86586.1|ALR86670.1|ANC48967.1|ANC49051.1|ANG44306.1|ANI86996.1|ANI87083.1|AOY34944.1|AOY35028.1|AOY35112.1|AOY35196.1|AOY35280.1|AOY35364.1|AOY35448.1|AOY35532.1|AOY35616.1|CAB67151.2|NP_084686.2|QBE85671.1|QBE85755.1|YP_001687136.1|YP_001687282.1|YP_001687366.1|YP_001687450…	1	2.1	3.7	RNA polymerase subunit beta (chloroplast)
1	2	578.813	-0.0002	-0.2	3240000	3.51	3.51	39.7	5.42	8	SRPVRDGQNK	1	1	3.51	3.51	578.813	1156.62	-0.0002	(R)	SRPVRDGQNK	(V)	Oenothera argillicola		ABW98704.1	ABW98704.1|ABW98872.1|ABX10037.1|ABX10121.1|ADT63282.1|ALR85999.1|ALR86083.1|ALR86167.1|ALR86251.1|ALR86335.1|ALR86419.1|ALR86503.1|ALR86587.1|ALR86671.1|ANC48968.1|ANC49052.1|ANG44307.1|AOY34945.1|AOY35029.1|AOY35113.1|AOY35197.1|AOY35281.1|AOY35365.1|AOY35449.1|AOY35533.1|AOY35617.1|CAB67152.2|NP_084687.2|QBE85672.1|QBE85756.1|YP_001687137.1|YP_001687283.1|YP_001687367.1|YP_001687451.1|YP_00922…	1	3.1	3.51	RNA polymerase subunit beta' (chloroplast)
1	3	575.287	-0.0048	-2.8	1030000	2.42	2.42	41.5	15.48	10	DPGSRLGSNNGSXFFR	2	2	2.42	2.42	575.287	1723.85	-0.0048	(R)	DPGSRLGSNNGSXFFR	(E)	Oenothera speciosa		AML79398.1	AML79398.1	1	4.1	2.42	putative LOV domain-containing protein

## Sheet: Flaxseed oil
num_Spectra	z	parent_m_over_z	delta_parent_mass	delta_ppm	totalIntensity	score	deltaForwardReverseScore	percent_scored_peak_intensity	retentionTimeMin	chromatographicPeakWidthSec	Sequence	numColumnsSequenceObserved	numSpectraSequenceObserved	bestScore	bestDeltaForwardReverseScore	best_parent_m_over_z	best_matched_parent_mass	best_delta_parent_mass	previous_aa	sequence	next_aa	species	speciesMulti	accession_number	accession_numbers	peptide_num	protein_group_num	protein_score	entry_name
1	2	658.313	0.0131	10	5620000	21.89	21.89	96.3	6.47	12	DLPGQCGTQPSR	2	2	22.39	22.39	658.313	1315.61	0.0125	(R)	DLPGQCGTQPSR	(C)	Linum usitatissimum	Linum usitatissimum	CAC94011.1	CAC94011.1	1	1.1	133.74	conlinin
11	3	646.934	0.017	8.8	270000000	18.71	18.71	82.3	6.93	12	GGGQQSQHFDSCCDDLK	1	11	18.71	18.71	646.934	1938.77	0.017	(R)	GGGQQSQHFDSCCDDLK	(Q)	Linum usitatissimum	Linum usitatissimum	CAC94011.1	CAC94011.1	2	1.1	133.74	conlinin
2	2	745.331	0.0089	6	3530000	19.02	19.02	79.9	1.4	8	GGQGGQGQQQQCEK	2	6	21.13	21.13	745.33	1489.64	0.0083	(R)	GGQGGQGQQQQCEK	(Q)	Linum usitatissimum	Linum usitatissimum	CAC94011.1	CAC94011.1	3	1.1	133.74	conlinin
3	2	857.417	0.0117	6.8	46000000	21.33	21.33	92.4	5.05	10	QDIQQQGQQQEVER	2	7	24.48	24.48	857.417	1713.82	0.0117	(R)	QDIQQQGQQQEVER	(W)	Linum usitatissimum	Linum usitatissimum	CAC94011.1	CAC94011.1	4	1.1	133.74	conlinin
1	2	596.807	0.0118	9.9	40500000	17.13	17.13	86.7	11.23	12	QIQEQDYLR	1	1	17.13	17.13	596.807	1192.6	0.0118	(K)	QIQEQDYLR	(S)	Linum usitatissimum	Linum usitatissimum	CAC94011.1	CAC94011.1	5	1.1	133.74	conlinin
1	2	613.293	0.0121	9.9	3630000	17.15	17.15	83.6	16.78	11	SCQQFLWEK	2	2	17.61	17.61	613.293	1225.57	0.0118	(R)	SCQQFLWEK	(V)	Linum usitatissimum	Linum usitatissimum	CAC94011.1	CAC94011.1	6	1.1	133.74	conlinin
1	2	406.659	0.0081	9.9	4970000	12.29	12.29	81.3	1.38	6	SECTCR	1	1	12.29	12.29	406.659	812.303	0.0081	(R)	SECTCR	(G)	Linum usitatissimum	Linum usitatissimum	CAC94011.1	CAC94011.1	7	1.1	133.74	conlinin
1	2	686.9	0.0097	7.1	1760000	18.86	18.86	91.4	22.98	10	FGPIPVASVVSTAK	1	1	18.86	18.86	686.9	1372.78	0.0097	(K)	FGPIPVASVVSTAK	(G)	Linum usitatissimum	Linum usitatissimum	CAV22173.1	CAV22173.1	1	2.1	102.45	unnamed protein product
2	2	650.348	0.0078	6	494000	15.02	15.02	74.7	10.72	11	IVNETINHFGR	2	3	18.37	18.37	650.348	1299.68	0.0082	(R)	IVNETINHFGR	(L)	Linum usitatissimum	Linum usitatissimum	CAV22173.1	CAV22173.1	2	2.1	102.45	unnamed protein product
1	2	496.233	0.0075	7.6	573000	12.65	12.65	83.5	10	9	MDVDQDLR	2	2	15.05	15.05	496.234	991.451	0.009	(R)	MDVDQDLR	(D)	Linum usitatissimum	Linum usitatissimum	CAV22173.1	CAV22173.1	3	2.1	102.45	unnamed protein product
2	2	682.317	0.0098	7.2	1200000	10.01	10.01	62.4	8.83	9	MDVDQDLRDEK	2	4	12.59	12.59	682.316	1363.62	0.0081	(R)	MDVDQDLRDEK	(F)	Linum usitatissimum	Linum usitatissimum	CAV22173.1	CAV22173.1	4	2.1	102.45	unnamed protein product
3	3	886.486	0.0161	6.1	8840000	19.41	19.41	95.4	37.7	15	VELSPDIGVLIVTPGYIESELTQGK	2	5	20.72	20.72	1329.22	2657.43	0.009	(R)	VELSPDIGVLIVTPGYIESELTQGK	(F)	Linum usitatissimum	Linum usitatissimum	CAV22173.1	CAV22173.1	5	2.1	102.45	unnamed protein product
1	3	765.072	0.0197	8.6	1140000	16.86	16.86	87.6	23.07	12	VILITGASSGIGEHLAYEYGSR	1	1	16.86	16.86	765.072	2293.18	0.0197	(K)	VILITGASSGIGEHLAYEYGSR	(G)	Linum usitatissimum	Linum usitatissimum	CAV22173.1	CAV22173.1	6	2.1	102.45	unnamed protein product
4	3	655.93	0.0162	8.3	27500000	22.58	22.58	92.3	13.3	11	GGGEQSQYFDSCCDDLK	1	4	22.58	22.58	655.93	1965.76	0.0162	(R)	GGGEQSQYFDSCCDDLK	(Q)	Linum usitatissimum	Linum usitatissimum	CAC94010.1	CAC94010.1	1	3.1	101.34	conlinin
6	2	1331.61	0.0099	3.7	21900000	15.57	15.57	73.1	14.87	10	GGGQGGQGQQQSCEQQIQQQDFLR	2	14	21.32	21.32	888.079	2662.2	0.0193	(R)	GGGQGGQGQQQSCEQQIQQQDFLR	(S)	Linum usitatissimum	Linum usitatissimum	CAC94010.1	CAC94010.1	2	3.1	101.34	conlinin
2	2	863.933	0.012	6.9	5020000	22.38	22.38	93.4	4.45	8	QEIQQQGQQQEVQR	2	5	22.88	22.88	863.932	1726.85	0.0101	(R)	QEIQQQGQQQEVQR	(W)	Linum usitatissimum	Linum usitatissimum	CAC94010.1	CAC94010.1	3	3.1	101.34	conlinin
4	2	541.744	0.0096	8.9	18000000	16.25	16.25	73.3	3.33	8	QLSTGCTCR	1	4	16.25	16.25	541.744	1082.47	0.0096	(K)	QLSTGCTCR	(G)	Linum usitatissimum	Linum usitatissimum	CAC94010.1	CAC94010.1	4	3.1	101.34	conlinin
1	2	622.271	0.0105	8.4	6090000	18.31	18.31	82	15.03	11	SCQQFMWEK	1	1	18.31	18.31	622.271	1243.52	0.0105	(R)	SCQQFMWEK	(V)	Linum usitatissimum	Linum usitatissimum	CAC94010.1	CAC94010.1	5	3.1	101.34	conlinin
1	2	600.268	0.0098	8.2	1290000	15.55	13.99	80.4	8.17	8	MQDAAGYMGQK	2	2	16.32	13.41	600.267	1199.52	0.0089	(R)	MQDAAGYMGQK	(T)	Linum usitatissimum	Linum usitatissimum	ABB01616.1	ABB01624.1|ABB01623.1|ABB01616.1	1	4.1	51.29	oleosin high molecular weight isoform
2	2	594.327	0.0096	8.1	1550000	11.65	11.65	72.8	3.63	8	TKEVGQEIQR	2	4	11.65	11.65	594.327	1187.64	0.0096	(K)	TKEVGQEIQR	(K)	Linum usitatissimum	Linum usitatissimum	ABB01616.1	ABB01624.1|ABB01623.1|ABB01616.1	2	4.1	51.29	oleosin high molecular weight isoform
1	2	1089.55	0.013	6	7140000	21.01	21.01	94.4	19.38	11	YLQQAGQGVGVGVPDSFEQAK	2	2	23.32	23.32	1089.55	2178.08	0.0139	(R)	YLQQAGQGVGVGVPDSFEQAK	(R)	Linum usitatissimum	Linum usitatissimum	ABB01616.1	ABB01623.1|ABB01616.1	3	4.1	51.29	oleosin high molecular weight isoform
1	2	600.268	0.0098	8.2	1290000	15.55	13.99	80.4	8.17	8	MQDAAGYMGQK	2	2	16.32	13.41	600.267	1199.52	0.0089	(R)	MQDAAGYMGQK	(T)	Linum usitatissimum	Linum usitatissimum	ABB01624.1	ABB01624.1|ABB01623.1|ABB01616.1	1	4.2	46.93	oleosin high molecular weight isoform
2	2	594.327	0.0096	8.1	1550000	11.65	11.65	72.8	3.63	8	TKEVGQEIQR	2	4	11.65	11.65	594.327	1187.64	0.0096	(K)	TKEVGQEIQR	(K)	Linum usitatissimum	Linum usitatissimum	ABB01624.1	ABB01624.1|ABB01623.1|ABB01616.1	2	4.2	46.93	oleosin high molecular weight isoform
3	2	1082.54	0.0117	5.4	13500000	18.96	18.96	83.9	19.22	9	YLQQAGQGVGVGVPDSFDQAK	2	6	18.96	18.96	1082.54	2164.07	0.0117	(R)	YLQQAGQGVGVGVPDSFDQAK	(R)	Linum usitatissimum	Linum usitatissimum	ABB01624.1	ABB01624.1	3	4.2	46.93	oleosin high molecular weight isoform
2	2	715.395	0.0111	7.8	2140000	15.94	15.94	73.6	19.25	10	AAMENGVLTVTVPK	1	2	15.94	15.94	715.395	1429.77	0.0111	(K)	AAMENGVLTVTVPK	(A)	Linum usitatissimum	Linum usitatissimum	CBM38899.1	CBM39409.1|CBM38899.1	1	5.1	39.78	unnamed protein product
1	2	529.274	0.0096	9.1	988000	17.26	17.26	83.8	7.45	10	ETPEAHVFK	1	1	17.26	17.26	529.274	1057.53	0.0096	(K)	ETPEAHVFK	(A)	Linum usitatissimum	Linum usitatissimum	CBM38899.1	CBM39409.1|CBM38899.1	2	5.1	39.78	unnamed protein product
2	2	414.695	0.0074	9	320000	6.58	6.58	48	2.75	7	NDTWHR	1	2	6.58	6.58	414.695	828.375	0.0074	(K)	NDTWHR	(V)	Linum usitatissimum	Linum usitatissimum	CBM38899.1	CBM39409.1|CBM38899.1	3	5.1	39.78	unnamed protein product
1	2	887.957	0.0089	5	908000	22.98	22.98	95	22.82	12	NYELPDGQVITIGAER	1	1	22.98	22.98	887.957	1774.9	0.0089	(K)	NYELPDGQVITIGAER	(F)	Linum usitatissimum	Linum usitatissimum	AAW34192.1	AAW34192.1	1	6.1	36.47	actin
1	3	652.032	0.0172	8.8	1200000	13.49	13.49	70.9	19.02	11	VAPEEHPVLLTEAPLNPK	1	1	13.49	13.49	652.032	1954.06	0.0172	(R)	VAPEEHPVLLTEAPLNPK	(A)	Linum usitatissimum	Linum usitatissimum	AAW34192.1	ABH11670.1|AMY26649.1|AFN53639.1|AAW34192.1	2	6.1	36.47	actin
1	2	531.282	0.0091	8.6	269000	8.02	8.02	54.4	2.2	10	AAIKEESEGK	1	1	8.02	8.02	531.282	1061.55	0.0091	(K)	AAIKEESEGK	(L)	Linum usitatissimum	Linum usitatissimum	CAF22093.1	CAF22093.1	1	7.1	34.76	glyceraldehyde 3-phosphate dehydrogenase, partial
2	2	717.888	0.0099	6.9	1730000	9.12	9.12	64.4	18.27	7	AASFNIIPSSTGAAK	1	2	9.12	9.12	717.888	1434.76	0.0099	(R)	AASFNIIPSSTGAAK	(A)	Linum usitatissimum	Linum usitatissimum	CAF22093.1	ACS66683.1|CAF22093.1	2	7.1	34.76	glyceraldehyde 3-phosphate dehydrogenase, partial
4	2	721.915	0.0133	9.2	13200000	17.43	17.43	79.9	21.53	11	VPTADVSVVDLTVK	2	8	17.62	17.62	721.913	1442.81	0.0097	(R)	VPTADVSVVDLTVK	(L)	Linum usitatissimum	Linum usitatissimum	CAF22093.1	CAF22093.1	3	7.1	34.76	glyceraldehyde 3-phosphate dehydrogenase, partial
1	2	502.305	0.0084	8.4	570000	14.41	12.13	83	22.43	10	IFLENVIR	2	2	14.41	12.13	502.305	1003.59	0.0084	(K)	IFLENVIR	(D)	Linum usitatissimum	Linum usitatissimum	CBL76244.1	CBL76244.1	1	8.1	33.59	unnamed protein product
1	2	590.818	0.0071	6	510000	19.18	18.54	94.4	15.2	9	ISGLIYEETR	1	1	19.18	18.54	590.818	1180.62	0.0071	(R)	ISGLIYEETR	(G)	Linum usitatissimum	Linum usitatissimum	CBL76244.1	CBL76244.1	2	8.1	33.59	unnamed protein product
4	2	534.318	0.009	8.4	1780000	10.36	10.36	59.7	15.23	9	ESTLHLVLR	1	4	10.36	10.36	534.318	1067.62	0.009	(K)	ESTLHLVLR	(L)	Linum usitatissimum	UNREADABLE|Linum usitatissimum	AAA33401.1	sp|P69315.2|UBIQP_LINUS|AAA33401.1	1	9.1	24.62	ubiquitin, partial
4	2	533.284	0.0032	3	39200000	14.26	12.84	82	10.38	10	TLADYNIQK	1	4	14.26	12.84	533.284	1065.56	0.0032	(R)	TLADYNIQK	(E)	Linum usitatissimum	UNREADABLE|Linum usitatissimum	AAA33401.1	sp|P69315.2|UBIQP_LINUS|AAA33401.1	2	9.1	24.62	ubiquitin, partial
2	2	795.866	0.0103	6.5	3350000	11.1	11.1	62.5	6.6	8	ASDFGQQHVTGQQTS	2	6	11.1	11.1	795.866	1590.71	0.0103	(R)	ASDFGQQHVTGQQTS	(-)	Linum usitatissimum	Linum usitatissimum	ABB01620.1	ABB01620.1	1	10.1	24.57	oleosin low molecular weight isoform, partial
1	2	633.32	0.009	7.1	937000	13.47	13.47	70.2	6.05	11	HPVGADSLDQAR	1	1	13.47	13.47	633.32	1265.62	0.009	(R)	HPVGADSLDQAR	(M)	Linum usitatissimum	Linum usitatissimum	ABB01620.1	ABB01620.1|ABB01619.1	2	10.1	24.57	oleosin low molecular weight isoform, partial
2	2	788.858	0.0106	6.7	3250000	6.12	6.12	66.6	5.7	8	ASDFGQQHVSGQQTS	1	2	6.12	6.12	788.858	1576.7	0.0106	(R)	ASDFGQQHVSGQQTS	(-)	Linum usitatissimum	Linum usitatissimum	ABB01619.1	ABB01619.1	1	10.2	19.59	oleosin low molecular weight isoform, partial
1	2	633.32	0.009	7.1	937000	13.47	13.47	70.2	6.05	11	HPVGADSLDQAR	1	1	13.47	13.47	633.32	1265.62	0.009	(R)	HPVGADSLDQAR	(M)	Linum usitatissimum	Linum usitatissimum	ABB01619.1	ABB01620.1|ABB01619.1	2	10.2	19.59	oleosin low molecular weight isoform, partial
1	2	507.279	0.0082	8.1	981000	12.83	8.48	78.5	17.72	15	NAWPELVGK	1	1	12.83	8.48	507.279	1013.54	0.0082	(K)	NAWPELVGK	(S)	Linum usitatissimum	Linum usitatissimum	pdb|1DWM|A	pdb|1DWM|A|sp|P82381.1|ICI_LINUS	1	11.1	22.29	Chain A, LINUM USITATISSINUM TRYPSIN INHIBITOR
2	2	986.541	0.0095	4.8	1770000	9.46	9.46	64.9	24.5	10	VWVIVNDHGVVTSVPHIT	1	2	9.46	9.46	986.541	1972.07	0.0095	(R)	VWVIVNDHGVVTSVPHIT	(-)	Linum usitatissimum	Linum usitatissimum	pdb|1DWM|A	pdb|1DWM|A|sp|P82381.1|ICI_LINUS	2	11.1	22.29	Chain A, LINUM USITATISSINUM TRYPSIN INHIBITOR
1	2	666.859	0.0104	7.8	1140000	14.95	14.95	83.2	13.78	10	GILAADESTGTIGK	2	2	17.64	17.64	666.859	1332.7	0.0095	(K)	GILAADESTGTIGK	(R)	Linum grandiflorum	Linum grandiflorum	BAL41455.1	BAL41455.1	1	12.1	17.64	fructose-bisphosphate aldolase 1, partial
1	3	662.018	0.019	9.6	1720000	16.72	13.72	86.3	29.45	10	LLGLSCDDVLSHVEWIK	1	1	16.72	13.72	662.018	1984.02	0.019	(K)	LLGLSCDDVLSHVEWIK	(D)	Linum usitatissimum	Linum usitatissimum	CAL40952.1	CAL40952.1	1	13.1	16.72	unnamed protein product, partial
1	3	844.053	0.0201	8	386000	4.37	4.37	44.3	14.7	4	QGEQVTGGYGNYTTGGQTGYNHQI	1	1	4.37	4.37	844.053	2530.12	0.0201	(R)	QGEQVTGGYGNYTTGGQTGYNHQI	(-)	Linum usitatissimum	Linum usitatissimum	AMY26620.1	AMY26620.1	1	14.1	16.26	late embryogenesis abundant (lea) group 1-embryo development
1	2	487.772	0.0092	9.5	1190000	11.89	5.88	66.9	1.82	7	VAEAEATKR	1	1	11.89	5.88	487.772	974.527	0.0092	(R)	VAEAEATKR	(E)	Linum usitatissimum	Linum usitatissimum	AMY26620.1	AMY26620.1|AFN53712.1	2	14.1	16.26	late embryogenesis abundant (lea) group 1-embryo development
1	2	524.771	0.0082	7.8	339000	15	15	81.4	3.63	7	ETASNIGASAK	2	2	16.08	16.08	524.771	1048.53	0.0074	(K)	ETASNIGASAK	(A)	Linum usitatissimum	Linum usitatissimum	AFN53709.1	AMY26630.1|AFN53709.1	1	15.1	16.08	hypothetical protein
3	2	838.392	0.0105	6.2	6030000	10.65	10.65	75.4	7.17	9	ASEFAQQHVTGGQQTS	2	7	15.34	15.34	838.393	1675.77	0.0113	(R)	ASEFAQQHVTGGQQTS	(-)	Linum usitatissimum	Linum usitatissimum	ABB01617.1	ABB01622.1|ABB01617.1	1	16.1	15.34	oleosin low molecular weight isoform
4	2	831.386	0.013	7.8	15400000	8.37	8.37	66.3	6.78	8	ASEFGQQHVTGGQQTS	2	8	14.42	14.42	831.385	1661.75	0.0115	(R)	ASEFGQQHVTGGQQTS	(-)	Linum usitatissimum	Linum usitatissimum	ABB01618.1	ABB01618.1|ABB01621.1	1	17.1	14.42	oleosin low molecular weight isoform
1	2	485.786	0.0077	8	440000	11.6	9.24	81.2	12.77	8	LNVPVSDVK	1	1	11.6	9.24	485.786	970.557	0.0077	(R)	LNVPVSDVK	(N)	Linum usitatissimum	Linum usitatissimum	CAW65362.1	CBD35151.1|CBC49218.1|CBC99404.1|CAW96680.1|CAW65362.1	1	18.1	11.6	unnamed protein product
1	2	558.791	-0.0075	-6.7	10600000	10.57	6.78	71.7	8.45	8	VALEACVQAR	2	2	10.57	6.78	558.791	1116.58	-0.0075	(R)	VALEACVQAR	(N)	Linum africanum	Linum usitatissimum|Linum medium|Linum pratense|Linum oligophyllum|Linum nervosum|Linum arboreum|Linum trigynum|Linum tenuifolium|Linum suffruticosum|Linum strictum|Linum striatum|Linum gracile|Linum rupestre|Linum viscosum|Linum hirsutum|Linum perenne|Linum nodiflorum|Linum narbonense|Linum monogynum|Linum lewisii|Linum flavum|Linum catharticum|Linum bienne|Linum maritimum|Linum macraei|Linum ki…	ACR07797.1	AWM67343.1|AKG49034.1|YP_009443532.1|ATU06732.1|ARU80540.1|ADT78423.1|ADT78422.1|ADT78421.1|ADT78412.1|AAR29477.1|ACR07826.1|ACR07825.1|ACR07824.1|ACR07821.1|ACR07820.1|ACR07819.1|ACR07818.1|ACR07817.1|ACR07815.1|ACR07814.1|ACR07813.1|ACR07812.1|ADT78420.1|ADT78419.1|ADT78418.1|ADT78416.1|ADT78415.1|ADT78414.1|ADT78413.1|ACR07811.1|ACR07810.1|ACR07809.1|ACR07808.1|ACR07807.1|ACR07806.1|ACR07805.1…	1	19.1	10.57	ribulose-1,5-bisphosphate carboxylase/oxygenase large subunit (chloroplast)
1	2	362.199	0.0011	1.6	2040000	10.44	10.44	81	5.9	7	SFARSR	2	2	10.44	10.44	362.199	723.39	0.0011	(K)	SFARSR	(V)	Linum usitatissimum	Linum usitatissimum	AGD95011.1	AGD95011.1	1	20.1	10.44	malonyl-CoA:Acyl carrier protein transacylase
1	2	409.721	-0.0012	-1.5	262000	6.23	6.15	46.3	2.18	7	IGERDTK	2	2	10.04	10.04	409.721	818.437	-0.0018	(K)	IGERDTK	(E)	Linum usitatissimum	Linum usitatissimum	CAH23406.1	CAH23406.1	1	21.1	10.04	unnamed protein product, partial
1	2	515.788	-0.0089	-8.6	327000	9.67	4.02	64.7	13.08	10	EVDIGELKK	1	1	9.67	4.02	515.788	1030.58	-0.0089	(K)	EVDIGELKK	(L)	Linum usitatissimum	Linum usitatissimum	ACS91452.1	ACS91453.1|ACS91452.1	1	22.1	9.67	M1
1	2	515.306	0.0103	10	1960000	9.18	10.01	68.2	12.27	8	AVVQEKVEK	1	1	9.18	10.01	515.306	1029.59	0.0103	(K)	AVVQEKVEK	(V)	Linum usitatissimum	Linum usitatissimum	AFN53649.1	AMY26651.1|AFN53649.1	1	23.1	9.18	putative seed maturation protein
2	2	352.195	-0.0023	-3.3	717000	7.26	7.26	68.3	2.67	21	SXGDRR	1	2	7.26	7.26	352.195	703.385	-0.0023	(R)	SXGDRR	(S)	Linum usitatissimum	Linum usitatissimum	AIU47282.1	AIU47282.1	1	24.1	7.26	amaranthin-like lectin
1	2	351.206	0.0001	0.2	669000	7.01	5.43	66.9	4.92	13	AVAERR	1	1	7.01	5.43	351.206	701.405	0.0001	(K)	AVAERR	(C)	Linum usitatissimum	Linum usitatissimum	AFN53666.1	AFN53666.1	1	25.1	7.01	hypothetical protein
1	2	500.283	0.0011	1.1	418000	6.52	3.98	39.3	10.57	10	NNLVAIAER	1	1	6.52	3.98	500.283	999.558	0.0011	(K)	NNLVAIAER	(M)	Linum usitatissimum	Linum usitatissimum	AFN53684.1	AFN53684.1	1	26.1	6.52	putative ATP-binding protein
2	2	817.918	0.0044	2.7	2170000	6.41	6.02	58.5	18.72	11	GDEIARKIEMVMDK	1	2	6.41	6.02	817.918	1634.82	0.0044	(K)	GDEIARKIEMVMDK	(H)	Linum usitatissimum	Linum usitatissimum	AFJ52915.1	AFJ52915.1	1	27.1	6.41	UDP-glycosyltransferase 1
1	2	464.801	0.0008	0.8	2070000	6.36	6.36	61.2	4.87	10	LRVNSVLK	1	1	6.36	6.36	464.801	928.594	0.0008	(K)	LRVNSVLK	(W)	Linum usitatissimum	Linum usitatissimum	AMY26633.1	AMY26633.1	1	28.1	6.36	cgi-12 protein-related-mitochondrial transcription termination factor, mterf
1	2	415.727	-0.008	-9.6	269000	6.2	5.91	44.8	4.75	8	VKAMEPR	1	1	6.2	5.91	415.727	830.455	-0.008	(R)	VKAMEPR	(I)	Linum usitatissimum	Linum usitatissimum	AND01198.1	AND01198.1	1	29.1	6.2	putative GRAS domain family protein
1	2	423.207	0.0062	7.4	1110000	4.87	4.87	64.2	4.82	10	DLTEPDR	2	2	6.17	6.17	423.205	845.4	0.0032	(R)	DLTEPDR	(I)	Linum usitatissimum	Linum usitatissimum	AGM31788.1	AGM31788.1	1	30.1	6.17	squalene monooxygenase, partial
1	3	737.711	-0.0115	-5.2	985000	5.89	5.89	43.5	20.93	10	YPIYVGANRGRGQIYPDGSK	1	1	5.89	5.89	737.711	2211.13	-0.0115	(K)	YPIYVGANRGRGQIYPDGSK	(S)	Linum usitatissimum	Linum usitatissimum	AFU96169.1	YP_009443537.1|ATU06737.1|AFU96169.1	1	31.1	5.89	PetA, partial (chloroplast)
1	2	361.202	-0.0031	-4.3	490000	5.71	5.71	59.4	3.45	9	YTGKPR	1	1	5.71	5.71	361.202	721.399	-0.0031	(R)	YTGKPR	(V)	Linum usitatissimum	Linum usitatissimum	CBD24685.1	CBD24685.1	1	32.1	5.71	unnamed protein product
2	3	353.188	0.0037	3.5	2820000	4.71	4.71	54.6	7.43	10	DPTFRFFK	2	3	5.62	5.62	353.188	1057.55	0.0015	(-)	DPTFRFFK	(Q)	Linum usitatissimum	Linum usitatissimum	AEG76903.1	AEG76903.1	1	33.1	5.62	putative ATP-binding cassette transporter, partial
1	2	415.243	0.0018	2.1	1920000	5.33	5.33	46.1	11.28	10	AVINDGLK	1	1	5.33	5.33	415.243	829.478	0.0018	(K)	AVINDGLK	(L)	Linum usitatissimum	Linum usitatissimum	CAY34003.1	CAY34003.1|CAY35817.1	1	34.1	5.33	unnamed protein product
1	2	734.311	0.0061	4.1	27700000	5.24	5.24	73.3	8.37	13	EVMVSEDDQEMR	2	2	5.24	5.24	734.311	1467.61	0.0061	(R)	EVMVSEDDQEMR	(M)	Linum usitatissimum	Linum usitatissimum	AFJ52949.1	AFJ52949.1	1	35.1	5.24	UDP-glycosyltransferase 1
1	2	380.239	-0.0018	-2.4	537000	5.13	5.13	63.6	11.82	11	SLLTGLR	1	1	5.13	5.13	380.239	759.472	-0.0018	(K)	SLLTGLR	(Q)	Linum usitatissimum	Linum usitatissimum	AAK28803.1	AAK28806.1|AAK28804.1|AAK28803.1|CBC56700.1|CBC56698.1|CBC56694.1|CBC56690.1|CBC56688.1|CBC56686.1|CBC56684.1|CBD16706.1|CBD16704.1|CBD16700.1|CBD16696.1	1	36.1	5.13	resistance-like protein P1-A
1	2	638.821	0.003	2.3	839000	4.88	4.88	70.7	24.12	10	VQKELQECSR	1	1	4.88	4.88	638.821	1276.63	0.003	(R)	VQKELQECSR	(D)	Linum usitatissimum	Linum usitatissimum	CAV28198.1	CAV28198.1	1	37.1	4.88	unnamed protein product
1	3	498.604	-0.0025	-1.7	2250000	4.84	1.77	68.8	24.5	11	DFSQAAAGLPLYIK	1	1	4.84	1.77	498.604	1493.8	-0.0025	(K)	DFSQAAAGLPLYIK	(V)	Linum usitatissimum	Linum usitatissimum	CAC35338.1	CAW34903.1|CAW34703.1|CAW39686.1|CAC35338.1	1	38.1	4.84	Nbi-D protein
1	4	857.956	-0.0274	-8	3510000	4.78	4.78	36.1	31.62	13	ISFAAQVKNYANTVSQIVRLLGGEESAANHLK	1	1	4.78	4.78	857.956	3428.83	-0.0274	(R)	ISFAAQVKNYANTVSQIVRLLGGEESAANHLK	(K)	Linum usitatissimum	Linum usitatissimum	AFN53715.1	AMY26615.1|AFN53715.1	1	39.1	4.78	putative GDSL-like lipase acylhydrolase protein
1	2	405.234	-0.0019	-2.4	1550000	4.73	4.73	72.1	8.15	10	VSHPTLR	1	1	4.73	4.73	405.234	809.463	-0.0019	(R)	VSHPTLR	(T)	Linum usitatissimum	Linum usitatissimum	AER92601.1	AER92601.1	1	40.1	4.73	putative coilin
1	2	500.774	-0.0019	-1.9	805000	4.66	4.66	58.2	9.35	15	LLDTNPATR	1	1	4.66	4.66	500.774	1000.54	-0.0019	(K)	LLDTNPATR	(I)	Linum usitatissimum	Linum usitatissimum	CBD32953.1	CBD32953.1|CBD33653.1	1	41.1	4.66	unnamed protein product
1	2	470.721	-0.0015	-1.6	490000	4.48	4.48	54.6	6.75	9	DEYTKER	1	1	4.48	4.48	470.721	940.437	-0.0015	(R)	DEYTKER	(L)	Linum usitatissimum	Linum usitatissimum	CAW37908.1	CBD35126.1|CBC49058.1|CBC81210.1|CBC64000.1|CBC14322.1|CBC07517.1|CBC03780.1|CAW72762.1|CAW81399.1|CAW65285.1|CAW37908.1|CAW47893.1|CAW41948.1	1	42.1	4.48	unnamed protein product
1	2	390.252	-0.0023	-2.9	274000	4.44	4.44	41.9	7.55	4	RVHLVR	1	1	4.44	4.44	390.252	779.5	-0.0023	(K)	RVHLVR	(N)	Linum usitatissimum	Linum usitatissimum	CAZ78242.1	CAZ78242.1|CAZ78669.1	1	43.1	4.44	unnamed protein product
1	3	600.679	0.0114	6.3	1330000	4.14	4.14	47	28.22	13	LLKSRGAAALDGLPDFR	1	1	4.14	4.14	600.679	1800.01	0.0114	(R)	LLKSRGAAALDGLPDFR	(F)	Linum usitatissimum	Linum usitatissimum	AFJ52993.1	AFJ52993.1	1	44.1	4.14	UDP-glycosyltransferase 1
1	2	523.291	-0.0043	-4.1	2440000	4.14	4.14	56.6	11.68	10	WQNGVVSKK	1	1	4.14	4.14	523.291	1045.58	-0.0043	(K)	WQNGVVSKK	(C)	Linum usitatissimum	Linum usitatissimum	AFN53650.1	AFN53650.1	1	45.1	4.14	hypothetical protein

## Sheet: Hemp oil
num_Spectra	z	parent_m_over_z	delta_parent_mass	delta_ppm	totalIntensity	score	deltaForwardReverseScore	percent_scored_peak_intensity	retentionTimeMin	chromatographicPeakWidthSec	Sequence	numColumnsSequenceObserved	numSpectraSequenceObserved	bestScore	bestDeltaForwardReverseScore	best_parent_m_over_z	best_matched_parent_mass	best_delta_parent_mass	previous_aa	sequence	next_aa	species	speciesMulti	accession_number	accession_numbers	peptide_num	protein_group_num	protein_score	entry_name
1	2	824.419	0.0142	8.6	75300000	25.12	22.69	97.2	26.98	17	AMPDDVLANAFQISR	2	3	25.12	22.69	824.419	1647.82	0.0142	(R)	AMPDDVLANAFQISR	(E)	Cannabis sativa	Cannabis sativa	CDP79028.1	SNQ45156.1|SNQ45155.1|CDP79029.1|CDP79028.1	1	1.1	490.4	edestin 2
1	2	653.849	0.0113	8.6	38300000	23.88	23.88	94.3	22.22	14	ASAQGFEWIAVK	1	1	23.88	23.88	653.849	1306.68	0.0113	(K)	ASAQGFEWIAVK	(T)	Cannabis sativa	Cannabis sativa	CDP79028.1	CDP79028.1|CDP79027.1	2	1.1	490.4	edestin 2
1	2	790.887	0.0117	7.4	10200000	16.43	16.43	92.2	15.88	11	DEISVFSPSSQQTR	2	2	16.43	16.43	790.887	1580.76	0.0117	(R)	DEISVFSPSSQQTR	(Y)	Cannabis sativa	Cannabis sativa	CDP79028.1	SNQ45156.1|SNQ45155.1|CDP79029.1|CDP79028.1|CDP79027.1	3	1.1	490.4	edestin 2
1	2	837.972	0.0163	9.7	81900000	16.25	16.25	95.1	26.42	14	EGQIFVVPQNFAVVK	2	2	18.23	18.23	837.971	1674.92	0.0131	(R)	EGQIFVVPQNFAVVK	(K)	Cannabis sativa	Cannabis sativa	CDP79028.1	SNQ45156.1|SNQ45155.1|CDP79029.1|CDP79028.1|CDP79027.1	4	1.1	490.4	edestin 2
2	2	902.017	0.0099	5.5	1690000	12.06	12.06	74.3	22.8	10	EGQIFVVPQNFAVVKK	2	4	16.39	16.39	902.017	1803.02	0.0101	(R)	EGQIFVVPQNFAVVKK	(A)	Cannabis sativa	Cannabis sativa	CDP79028.1	SNQ45156.1|SNQ45155.1|CDP79029.1|CDP79028.1|CDP79027.1	5	1.1	490.4	edestin 2
3	2	978.447	0.0137	7	31800000	22.82	22.82	87.2	20.58	13	ESGEQTPNGNIFSGFDTR	2	6	22.82	22.82	978.447	1955.87	0.0137	(R)	ESGEQTPNGNIFSGFDTR	(I)	Cannabis sativa	Cannabis sativa	CDP79028.1	SNQ45156.1|SNQ45155.1|CDP79029.1|CDP79028.1|CDP79027.1	6	1.1	490.4	edestin 2
1	2	524.781	0.0104	10	2030000	11.86	11.86	78.8	4.98	12	FHLAGNPHR	1	1	11.86	11.86	524.781	1048.54	0.0104	(R)	FHLAGNPHR	(E)	Cannabis sativa	Cannabis sativa	CDP79028.1	SNQ45155.1|CDP79029.1|CDP79028.1|CDP79027.1	7	1.1	490.4	edestin 2
1	2	599.83	0.0107	8.9	8020000	16.12	16.12	94.9	15.67	11	GEDLQIIAPSR	1	1	16.12	16.12	599.83	1198.64	0.0107	(R)	GEDLQIIAPSR	(I)	Cannabis sativa	Cannabis sativa	CDP79028.1	CDP79029.1|CDP79028.1|CDP79027.1	8	1.1	490.4	edestin 2
1	2	870.436	0.0115	6.6	6330000	19.83	19.83	91.8	16.03	14	GIHGAVIPGCPETFER	2	2	19.83	19.83	870.436	1739.85	0.0115	(R)	GIHGAVIPGCPETFER	(G)	Cannabis sativa	Cannabis sativa	CDP79028.1	SNQ45156.1|SNQ45155.1|CDP79029.1|CDP79028.1|CDP79027.1	9	1.1	490.4	edestin 2
1	2	1134.11	0.0124	5.5	13200000	23.76	23.76	95.6	42.67	10	GLLLPSFLNAPMMFYVIQGR	2	3	24.02	24.02	1134.11	2267.21	0.0098	(R)	GLLLPSFLNAPMMFYVIQGR	(G)	Cannabis sativa	Cannabis sativa	CDP79028.1	SNQ45156.1|SNQ45155.1|CDP79029.1|CDP79028.1|CDP79027.1	10	1.1	490.4	edestin 2
2	2	843.946	0.0141	8.4	38900000	25.43	23.73	96.2	18.92	16	ILAESFNVDTELAHK	2	3	26.42	26.42	843.944	1686.87	0.0112	(R)	ILAESFNVDTELAHK	(L)	Cannabis sativa	Cannabis sativa	CDP79028.1	SNQ45156.1|SNQ45155.1|CDP79029.1|CDP79028.1|CDP79027.1	11	1.1	490.4	edestin 2
1	2	402.201	0.0057	7.1	7070000	12.58	12.58	88.1	2.35	8	IQEEER	1	1	12.58	12.58	402.201	803.389	0.0057	(R)	IQEEER	(R)	Cannabis sativa	Cannabis sativa	CDP79028.1	CDP79029.1|CDP79028.1|CDP79027.1	12	1.1	490.4	edestin 2
6	2	480.252	0.0068	7.1	15700000	8.05	8.05	56	1.53	7	IQEEERR	1	6	8.05	8.05	480.252	959.49	0.0068	(R)	IQEEERR	(H)	Cannabis sativa	Cannabis sativa	CDP79028.1	SNQ45156.1|SNQ45155.1|CDP79029.1|CDP79028.1|CDP79027.1	13	1.1	490.4	edestin 2
4	2	717.897	0.0132	9.2	9150000	11.3	11.3	66.2	18.73	8	KASAQGFEWIAVK	2	7	11.3	11.3	717.897	1434.77	0.0132	(K)	KASAQGFEWIAVK	(T)	Cannabis sativa	Cannabis sativa	CDP79028.1	SNQ45156.1|SNQ45155.1|CDP79029.1|CDP79028.1|CDP79027.1	14	1.1	490.4	edestin 2
2	2	779.448	0.0144	9.3	181000000	21.85	21.85	97.1	25.02	15	LNTLNNYNLPILR	1	2	21.85	21.85	779.448	1557.87	0.0144	(R)	LNTLNNYNLPILR	(F)	Cannabis sativa	Cannabis sativa	CDP79028.1	SNQ45156.1|SNQ45155.1|CDP79029.1|CDP79028.1|CDP79027.1	15	1.1	490.4	edestin 2
2	2	524.258	0.0094	8.9	382000	5.8	5.8	63.4	2.35	7	LQNRDDMR	2	3	8.18	8.18	524.258	1047.5	0.0089	(K)	LQNRDDMR	(E)	Cannabis sativa	Cannabis sativa	CDP79028.1	CDP79028.1|CDP79029.1	16	1.1	490.4	edestin 2
2	2	973.495	0.0099	5.1	1470000	11.16	11.16	74.5	18.55	9	LQVVDDNGRNVFDGELR	2	4	11.16	11.16	973.495	1945.97	0.0099	(R)	LQVVDDNGRNVFDGELR	(E)	Cannabis sativa	Cannabis sativa	CDP79028.1	SNQ45156.1|SNQ45155.1|CDP79029.1|CDP79028.1|CDP79027.1	17	1.1	490.4	edestin 2
1	3	680.702	0.0196	9.6	1380000	4.06	4.06	45.8	13.27	10	LRQNIDRPSQADIFNPR	2	3	4.57	4.57	680.703	2040.07	0.0199	(R)	LRQNIDRPSQADIFNPR	(G)	Cannabis sativa	Cannabis sativa	CDP79028.1	SNQ45156.1|SNQ45155.1|CDP79029.1|CDP79028.1|CDP79027.1	18	1.1	490.4	edestin 2
2	3	763.707	0.0177	7.7	1600000	17.82	17.82	73	21.5	9	NGMMAPHFNLDSHSVIYVTR	2	8	19.04	19.04	763.708	2289.09	0.0198	(K)	NGMMAPHFNLDSHSVIYVTR	(G)	Cannabis sativa	Cannabis sativa	CDP79028.1	SNQ45156.1|SNQ45155.1|CDP79029.1|CDP79028.1|CDP79027.1	19	1.1	490.4	edestin 2
5	3	590.973	0.0166	9.4	85600000	12.83	12.83	61.4	14.08	14	QNIDRPSQADIFNPR	2	8	12.83	12.83	590.973	1770.89	0.0166	(R)	QNIDRPSQADIFNPR	(G)	Cannabis sativa	Cannabis sativa	CDP79028.1	SNQ45156.1|SNQ45155.1|CDP79029.1|CDP79028.1|CDP79027.1	20	1.1	490.4	edestin 2
3	3	704.669	0.019	9	5470000	17.64	17.64	92.2	17.97	11	RESGEQTPNGNIFSGFDTR	2	5	18.81	18.81	704.668	2111.97	0.0156	(R)	RESGEQTPNGNIFSGFDTR	(I)	Cannabis sativa	Cannabis sativa	CDP79028.1	SNQ45156.1|SNQ45155.1|CDP79029.1|CDP79028.1|CDP79027.1	21	1.1	490.4	edestin 2
1	3	808.448	0.0202	8.3	2240000	14.76	14.76	87.8	38.37	12	RGLLLPSFLNAPMMFYVIQGR	1	1	14.76	14.76	808.448	2423.31	0.0202	(R)	RGLLLPSFLNAPMMFYVIQGR	(G)	Cannabis sativa	Cannabis sativa	CDP79028.1	SNQ45156.1|SNQ45155.1|CDP79029.1|CDP79028.1|CDP79027.1	22	1.1	490.4	edestin 2
2	3	1213.54	0.0199	5.5	3340000	10.81	10.81	59.5	20.5	13	RVECEAGVSEYWDIQNTEDDELHCAGVETAR	2	6	23.22	23.22	910.408	3638.58	0.033	(R)	RVECEAGVSEYWDIQNTEDDELHCAGVETAR	(H)	Cannabis sativa	Cannabis sativa	CDP79028.1	SNQ45156.1|SNQ45155.1|CDP79029.1|CDP79028.1|CDP79027.1	23	1.1	490.4	edestin 2
4	2	651.786	0.009	6.9	39100000	15.76	15.76	80.6	1.18	6	SEGASSDEQHQK	2	7	18.78	18.78	651.785	1302.56	0.0078	(R)	SEGASSDEQHQK	(V)	Cannabis sativa	Cannabis sativa	CDP79028.1	SNQ45156.1|SNQ45155.1|CDP79029.1|CDP79028.1|CDP79027.1	24	1.1	490.4	edestin 2
1	2	701.354	0.0109	7.8	1150000	4.3	4.3	49.9	9.33	13	TNDNAMRNPLAGK	2	3	8.82	8.82	701.354	1401.69	0.0094	(K)	TNDNAMRNPLAGK	(V)	Cannabis sativa	Cannabis sativa	CDP79028.1	SNQ45156.1|SNQ45155.1|CDP79029.1|CDP79028.1|CDP79027.1	25	1.1	490.4	edestin 2
4	3	1161.5	0.0191	5.5	6290000	25	25	94.6	22.17	12	VECEAGVSEYWDIQNTEDDELHCAGVETAR	2	7	27.24	27.24	1161.5	3482.47	0.0154	(R)	VECEAGVSEYWDIQNTEDDELHCAGVETAR	(H)	Cannabis sativa	Cannabis sativa	CDP79028.1	SNQ45156.1|SNQ45155.1|CDP79029.1|CDP79028.1|CDP79027.1	26	1.1	490.4	edestin 2
3	2	727.417	0.014	9.6	90000000	9.98	9.98	74	13.9	14	VRGEDLQIIAPSR	2	8	10.14	10.14	727.416	1453.81	0.0123	(R)	VRGEDLQIIAPSR	(I)	Cannabis sativa	Cannabis sativa	CDP79028.1	SNQ45156.1|SNQ45155.1|CDP79029.1|CDP79028.1|CDP79027.1	27	1.1	490.4	edestin 2
1	2	634.292	0.0127	10	5230000	17.48	17.48	80.9	8.55	9	WQSQCQFQR	2	2	17.48	17.48	634.292	1267.56	0.0127	(R)	WQSQCQFQR	(L)	Cannabis sativa	Cannabis sativa	CDP79028.1	SNQ45155.1|CDP79029.1|CDP79028.1|CDP79027.1	28	1.1	490.4	edestin 2
1	3	652.991	0.0178	9.1	19300000	20.47	20.47	96	14.58	16	YGRDEISVFSPSSQQTR	1	1	20.47	20.47	652.991	1956.94	0.0178	(K)	YGRDEISVFSPSSQQTR	(Y)	Cannabis sativa	Cannabis sativa	CDP79028.1	SNQ45156.1|SNQ45155.1|CDP79029.1|CDP79028.1|CDP79027.1	29	1.1	490.4	edestin 2
2	2	847.421	0.0125	7.4	67300000	22.8	22.8	94.8	19.87	35	AMPEDVIANSYQISR	2	4	23.36	23.36	847.42	1693.82	0.0107	(R)	AMPEDVIANSYQISR	(E)	Cannabis sativa	Cannabis sativa	SNQ45160.1	SNQ45160.1|SNQ45158.1	1	2.1	453.22	edestin 3
1	2	531.248	0.01	9.5	493000	8.14	8.14	61.6	2.75	8	CQVVDNNGR	1	1	8.14	8.14	531.248	1061.48	0.01	(R)	CQVVDNNGR	(S)	Cannabis sativa	Cannabis sativa	SNQ45160.1	SNQ45160.1|SNQ45158.1	2	2.1	453.22	edestin 3
2	4	1191.58	0.0317	6.7	4890000	13.54	13.54	82	34.9	12	EGDIIAIPAGMAYWCNNDGDQPLVTVNLIDVSNHNNQLDLTPR	2	4	15.82	15.82	1191.58	4763.28	0.0254	(K)	EGDIIAIPAGMAYWCNNDGDQPLVTVNLIDVSNHNNQLDLTPR	(R)	Cannabis sativa	Cannabis sativa	SNQ45160.1	SNQ45160.1	3	2.1	453.22	edestin 3
4	4	942.185	0.0244	6.5	5250000	17.38	17.38	84.1	23	11	EPDHRVECEGGMIESWNPNHEQFQCAGVALLR	2	10	17.38	17.38	942.185	3765.7	0.0244	(R)	EPDHRVECEGGMIESWNPNHEQFQCAGVALLR	(L)	Cannabis sativa	Cannabis sativa	SNQ45160.1	SNQ45160.1	4	2.1	453.22	edestin 3
4	2	889.426	0.0147	8.2	18100000	24.03	24.03	94.4	15.58	23	FYIAGNPHEDFPQSR	2	11	24.03	24.03	889.426	1777.83	0.0147	(R)	FYIAGNPHEDFPQSR	(R)	Cannabis sativa	Cannabis sativa	SNQ45160.1	SNQ45160.1	5	2.1	453.22	edestin 3
3	2	1049.02	0.0153	7.3	154000000	20.73	19.06	82.7	30.92	14	GFSVNLIQEAFNVDSETAR	2	7	21.86	20.54	1049.02	2097.02	0.0126	(R)	GFSVNLIQEAFNVDSETAR	(K)	Cannabis sativa	Cannabis sativa	SNQ45160.1	SNQ45160.1|SNQ45158.1	6	2.1	453.22	edestin 3
1	3	742.385	0.0193	8.7	2170000	18.62	18.62	91	28.42	11	GFSVNLIQEAFNVDSETARK	2	2	19.48	19.48	742.385	2225.12	0.0193	(R)	GFSVNLIQEAFNVDSETARK	(I)	Cannabis sativa	Cannabis sativa	SNQ45160.1	SNQ45160.1|SNQ45158.1	7	2.1	453.22	edestin 3
4	3	846.756	0.0249	9.8	104000000	21.04	21.04	93.6	29.63	12	GVLGTLFPGCAETFEEAQVSVGGGR	2	6	23.38	23.38	1269.62	2538.23	0.0128	(R)	GVLGTLFPGCAETFEEAQVSVGGGR	(S)	Cannabis sativa	Cannabis sativa	SNQ45160.1	SNQ45160.1|SNQ45158.1	8	2.1	453.22	edestin 3
5	2	965.495	0.0164	8.5	35500000	17.51	17.51	79.7	14.33	11	IEEEKQQEGLPNNVFR	2	8	19.92	19.92	965.492	1929.97	0.0098	(R)	IEEEKQQEGLPNNVFR	(G)	Cannabis sativa	Cannabis sativa	SNQ45160.1	SNQ45160.1	9	2.1	453.22	edestin 3
1	2	504.746	0.0098	9.7	12400000	14.77	14.77	86.9	5.88	8	IQSQDDFR	1	1	14.77	14.77	504.746	1008.47	0.0098	(K)	IQSQDDFR	(G)	Cannabis sativa	Cannabis sativa	SNQ45160.1	SNQ45160.1	10	2.1	453.22	edestin 3
4	2	568.794	0.0107	9.4	16400000	16.27	16.27	90.9	4.4	9	KIQSQDDFR	1	4	16.27	16.27	568.794	1136.57	0.0107	(R)	KIQSQDDFR	(G)	Cannabis sativa	Cannabis sativa	SNQ45160.1	SNQ45160.1	11	2.1	453.22	edestin 3
2	2	579.794	0.0115	9.9	14200000	7.17	7.17	73.7	4.57	13	LRENMGDPAR	2	5	7.17	7.17	579.794	1158.57	0.0115	(R)	LRENMGDPAR	(A)	Cannabis sativa	Cannabis sativa	SNQ45160.1	SNQ45160.1	12	2.1	453.22	edestin 3
2	2	926.026	0.0076	4.1	3530000	16.39	16.39	84.5	36.55	16	LTTVNSYNLPILSFLR	2	3	16.39	16.39	926.026	1851.04	0.0076	(R)	LTTVNSYNLPILSFLR	(L)	Cannabis sativa	Cannabis sativa	SNQ45160.1	SNQ45160.1|SNQ45158.1	13	2.1	453.22	edestin 3
1	2	794.368	0.0136	8.6	23500000	20.63	20.63	91.6	26.5	12	MAENEGFEWISFK	2	2	23.58	23.58	794.367	1587.71	0.0112	(K)	MAENEGFEWISFK	(T)	Cannabis sativa	Cannabis sativa	SNQ45160.1	SNQ45160.1	14	2.1	453.22	edestin 3
4	2	1166.59	0.0097	4.2	4890000	13.45	13.45	66.8	21.75	10	NAMYAPHYNINAHSIIYAIR	2	8	16.93	16.93	778.066	2332.17	0.0177	(K)	NAMYAPHYNINAHSIIYAIR	(G)	Cannabis sativa	Cannabis sativa	SNQ45160.1	SNQ45160.1	15	2.1	453.22	edestin 3
1	2	516.264	0.0101	9.8	4140000	9.81	9.81	72.4	2.97	7	QELQQTER	1	1	9.81	9.81	516.264	1031.51	0.0101	(R)	QELQQTER	(E)	Cannabis sativa	Cannabis sativa	SNQ45160.1	SNQ45160.1|SNQ45158.1	16	2.1	453.22	edestin 3
2	2	539.24	0.01	9.3	4930000	14.65	14.65	89.4	2.5	6	QEQEQEMR	2	3	14.65	14.65	539.24	1077.46	0.01	(R)	QEQEQEMR	(R)	Cannabis sativa	Cannabis sativa	SNQ45160.1	SNQ45160.1|SNQ45158.1	17	2.1	453.22	edestin 3
2	2	807.461	0.0132	8.2	32900000	15.08	15.08	83.9	22.12	11	QGQALTVPQNFAIVK	2	5	15.86	15.86	807.46	1613.9	0.0116	(R)	QGQALTVPQNFAIVK	(M)	Cannabis sativa	Cannabis sativa	SNQ45160.1	SNQ45160.1	18	2.1	453.22	edestin 3
1	2	651.34	0.0124	9.5	6090000	16.52	16.52	93.3	15.45	11	QQEGLPNNVFR	2	2	16.52	16.52	651.34	1301.66	0.0124	(K)	QQEGLPNNVFR	(G)	Cannabis sativa	Cannabis sativa	SNQ45160.1	SNQ45160.1	19	2.1	453.22	edestin 3
4	3	645.321	0.019	9.8	7990000	13.19	13.19	68.4	13.58	10	RFYIAGNPHEDFPQSR	1	4	13.19	13.19	645.321	1933.93	0.019	(R)	RFYIAGNPHEDFPQSR	(R)	Cannabis sativa	Cannabis sativa	SNQ45160.1	SNQ45160.1	20	2.1	453.22	edestin 3
1	2	592.276	0.0115	9.7	903000	4.83	4.83	44.9	1.53	8	RYSEESQER	2	2	8.57	8.57	592.274	1183.53	0.0078	(R)	RYSEESQER	(I)	Cannabis sativa	Cannabis sativa	SNQ45160.1	SNQ45160.1	21	2.1	453.22	edestin 3
2	2	660.806	0.0079	6	26700000	10.47	10.47	68.2	2.15	7	SRQEQEQEMR	2	5	10.47	10.47	660.806	1320.6	0.0079	(R)	SRQEQEQEMR	(R)	Cannabis sativa	Cannabis sativa	SNQ45160.1	SNQ45160.1|SNQ45158.1	22	2.1	453.22	edestin 3
2	2	834.382	0.0117	7	21500000	23.22	23.22	92.9	8.68	12	TAVYGDQNECQLNR	2	3	23.22	23.22	834.382	1667.74	0.0117	(R)	TAVYGDQNECQLNR	(L)	Cannabis sativa	Cannabis sativa	SNQ45160.1	SNQ45160.1	23	2.1	453.22	edestin 3
4	3	1044.49	0.0279	8.9	24100000	26.8	26.8	95.7	25.43	15	VECEGGMIESWNPNHEQFQCAGVALLR	2	5	28.51	28.51	1044.48	3131.41	0.0216	(R)	VECEGGMIESWNPNHEQFQCAGVALLR	(L)	Cannabis sativa	Cannabis sativa	SNQ45160.1	SNQ45160.1|SNQ45158.1	24	2.1	453.22	edestin 3
1	2	514.224	0.0088	8.5	2580000	17.51	17.51	87.1	2.23	6	YSEESQER	2	2	17.51	17.51	514.224	1027.43	0.0088	(R)	YSEESQER	(I)	Cannabis sativa	Cannabis sativa	SNQ45160.1	SNQ45160.1	25	2.1	453.22	edestin 3
1	3	552.589	0.0143	8.6	233000	12.16	12.16	85.2	5.32	8	YSEESQERIEEEK	1	1	12.16	12.16	552.589	1655.74	0.0143	(R)	YSEESQERIEEEK	(Q)	Cannabis sativa	Cannabis sativa	SNQ45160.1	SNQ45160.1	26	2.1	453.22	edestin 3
3	3	980.138	0.0176	6	3920000	14.27	14.27	78.7	14.87	11	YSEESQERIEEEKQQEGLPNNVFR	1	3	14.27	14.27	980.138	2938.38	0.0176	(R)	YSEESQERIEEEKQQEGLPNNVFR	(G)	Cannabis sativa	Cannabis sativa	SNQ45160.1	SNQ45160.1	27	2.1	453.22	edestin 3
2	2	847.421	0.0125	7.4	67300000	22.8	22.8	94.8	19.87	35	AMPEDVIANSYQISR	2	4	23.36	23.36	847.42	1693.82	0.0107	(R)	AMPEDVIANSYQISR	(E)	Cannabis sativa	Cannabis sativa	SNQ45158.1	SNQ45160.1|SNQ45158.1	1	2.2	390.94	edestin 3
1	2	531.248	0.01	9.5	493000	8.14	8.14	61.6	2.75	8	CQVVDNNGR	1	1	8.14	8.14	531.248	1061.48	0.01	(R)	CQVVDNNGR	(S)	Cannabis sativa	Cannabis sativa	SNQ45158.1	SNQ45160.1|SNQ45158.1	2	2.2	390.94	edestin 3
4	2	796.395	0.0119	7.5	14600000	13.52	13.52	70	12.47	9	EESSLFTTSHQGIR	2	8	13.76	13.76	796.395	1591.77	0.0109	(R)	EESSLFTTSHQGIR	(A)	Cannabis sativa	Cannabis sativa	SNQ45158.1	SNQ45158.1	3	2.2	390.94	edestin 3
2	3	739.377	0.0215	9.7	1730000	5.37	5.37	46.4	13.77	10	ERIEEEKEQEGLPNNVFR	2	4	11.09	11.09	739.375	2216.09	0.015	(R)	ERIEEEKEQEGLPNNVFR	(G)	Cannabis sativa	Cannabis sativa	SNQ45158.1	SNQ45158.1	4	2.2	390.94	edestin 3
2	3	823.053	0.0172	7	6420000	18.26	18.26	88.8	20.03	47	FYIAGNPHQEFPQSMMTQQGR	2	4	20.75	20.75	823.053	2467.13	0.0166	(R)	FYIAGNPHQEFPQSMMTQQGR	(R)	Cannabis sativa	Cannabis sativa	SNQ45158.1	SNQ45158.1	5	2.2	390.94	edestin 3
3	2	1049.02	0.0153	7.3	154000000	20.73	19.06	82.7	30.92	14	GFSVNLIQEAFNVDSETAR	2	7	21.86	20.54	1049.02	2097.02	0.0126	(R)	GFSVNLIQEAFNVDSETAR powtórka	(K)	Cannabis sativa	Cannabis sativa	SNQ45158.1	SNQ45160.1|SNQ45158.1	6	2.2	390.94	edestin 3
1	3	742.385	0.0193	8.7	2170000	18.62	18.62	91	28.42	11	GFSVNLIQEAFNVDSETARK	2	2	19.48	19.48	742.385	2225.12	0.0193	(R)	GFSVNLIQEAFNVDSETARK	(I)	Cannabis sativa	Cannabis sativa	SNQ45158.1	SNQ45160.1|SNQ45158.1	7	2.2	390.94	edestin 3
4	3	846.756	0.0249	9.8	104000000	21.04	21.04	93.6	29.63	12	GVLGTLFPGCAETFEEAQVSVGGGR	2	6	23.38	23.38	1269.62	2538.23	0.0128	(R)	GVLGTLFPGCAETFEEAQVSVGGGR	(S)	Cannabis sativa	Cannabis sativa	SNQ45158.1	SNQ45160.1|SNQ45158.1	8	2.2	390.94	edestin 3
5	2	965.987	0.0156	8.1	25900000	18.16	18.16	83.4	14.88	12	IEEEKEQEGLPNNVFR	2	11	19.69	19.69	644.328	1930.95	0.0187	(R)	IEEEKEQEGLPNNVFR	(G)	Cannabis sativa	Cannabis sativa	SNQ45158.1	SNQ45158.1	9	2.2	390.94	edestin 3
1	2	518.251	0.01	9.7	4780000	15.88	15.88	88.7	5.57	9	IQNQDDFR	1	1	15.88	15.88	518.251	1035.49	0.01	(K)	IQNQDDFR	(G)	Cannabis sativa	Cannabis sativa	SNQ45158.1	SNQ45158.1	10	2.2	390.94	edestin 3
2	2	582.298	0.0092	7.9	16600000	15.94	15.94	87.2	4.2	7	KIQNQDDFR	1	2	15.94	15.94	582.298	1163.58	0.0092	(R)	KIQNQDDFR	(G)	Cannabis sativa	Cannabis sativa	SNQ45158.1	SNQ45158.1	11	2.2	390.94	edestin 3
1	2	563.756	0.0112	9.9	2080000	13.11	13.11	75.7	3.43	7	LEACEPDHR	2	2	18.04	18.04	563.756	1126.49	0.0093	(R)	LEACEPDHR	(V)	Cannabis sativa	Cannabis sativa	SNQ45158.1	SNQ45158.1	12	2.2	390.94	edestin 3
2	5	848.592	0.0415	9.8	2370000	14.96	14.96	71.4	23.4	13	LEACEPDHRVECEGGMIESWNPNHEQFQCAGVALLR	1	2	14.96	14.96	848.592	4238.89	0.0415	(R)	LEACEPDHRVECEGGMIESWNPNHEQFQCAGVALLR	(L)	Cannabis sativa	Cannabis sativa	SNQ45158.1	SNQ45158.1	13	2.2	390.94	edestin 3
2	2	566.288	0.011	9.8	3040000	7.44	7.44	69.5	4.83	10	LRESMGDPAR	1	2	7.44	7.44	566.288	1131.56	0.011	(R)	LRESMGDPAR	(A)	Cannabis sativa	Cannabis sativa	SNQ45158.1	SNQ45158.1	14	2.2	390.94	edestin 3
2	2	926.026	0.0076	4.1	3530000	16.39	16.39	84.5	36.55	16	LTTVNSYNLPILSFLR	2	3	16.39	16.39	926.026	1851.04	0.0076	(R)	LTTVNSYNLPILSFLR	(L)	Cannabis sativa	Cannabis sativa	SNQ45158.1	SNQ45160.1|SNQ45158.1	15	2.2	390.94	edestin 3
2	2	794.384	0.0101	6.4	1690000	12.71	12.71	66.6	20.85	10	MAEKEGFEWVSFK	2	4	12.71	12.71	794.384	1587.75	0.0101	(K)	MAEKEGFEWVSFK	(T)	Cannabis sativa	Cannabis sativa	SNQ45158.1	SNQ45158.1	16	2.2	390.94	edestin 3
1	3	785.723	0.0181	7.7	948000	15.45	15.45	78	23.98	10	NAMYAPQYTMNAHNIIYAIR	2	2	18.35	18.35	785.723	2355.14	0.0163	(K)	NAMYAPQYTMNAHNIIYAIR	(G)	Cannabis sativa	Cannabis sativa	SNQ45158.1	SNQ45158.1	17	2.2	390.94	edestin 3
1	2	516.264	0.0101	9.8	4140000	9.81	9.81	72.4	2.97	7	QELQQTER	1	1	9.81	9.81	516.264	1031.51	0.0101	(R)	QELQQTER	(E)	Cannabis sativa	Cannabis sativa	SNQ45158.1	SNQ45160.1|SNQ45158.1	18	2.2	390.94	edestin 3
2	2	539.24	0.01	9.3	4930000	14.65	14.65	89.4	2.5	6	QEQEQEMR	2	3	14.65	14.65	539.24	1077.46	0.01	(R)	QEQEQEMR	(R)	Cannabis sativa	Cannabis sativa	SNQ45158.1	SNQ45160.1|SNQ45158.1	19	2.2	390.94	edestin 3
1	2	800.452	0.0121	7.5	13400000	14	14	83.6	20.57	11	QGQALTVPQNFAVVK	2	5	15.63	15.63	800.451	1599.89	0.0103	(R)	QGQALTVPQNFAVVK	(M)	Cannabis sativa	Cannabis sativa	SNQ45158.1	SNQ45158.1	20	2.2	390.94	edestin 3
2	2	660.806	0.0079	6	26700000	10.47	10.47	68.2	2.15	7	SRQEQEQEMR	2	5	10.47	10.47	660.806	1320.6	0.0079	(R)	SRQEQEQEMR	(R)	Cannabis sativa	Cannabis sativa	SNQ45158.1	SNQ45160.1|SNQ45158.1	21	2.2	390.94	edestin 3
1	2	850.368	0.0123	7.2	12400000	21.52	21.52	81.1	9.2	9	TAMYGDQNECQLNR	2	2	23.75	23.75	850.367	1699.72	0.0101	(R)	TAMYGDQNECQLNR	(L)	Cannabis sativa	Cannabis sativa	SNQ45158.1	SNQ45158.1	22	2.2	390.94	edestin 3
4	3	1044.49	0.0279	8.9	24100000	26.8	26.8	95.7	25.43	15	VECEGGMIESWNPNHEQFQCAGVALLR	2	5	28.51	28.51	1044.48	3131.41	0.0216	(R)	VECEGGMIESWNPNHEQFQCAGVALLR powtórka	(L)	Cannabis sativa	Cannabis sativa	SNQ45158.1	SNQ45160.1|SNQ45158.1	23	2.2	390.94	edestin 3
1	2	420.208	0.0079	9.4	353000	6.9	6.9	54	1.5	10	YSEERR	1	1	6.9	6.9	420.208	839.401	0.0079	(R)	YSEERR	(E)	Cannabis sativa	Cannabis sativa	SNQ45158.1	SNQ45158.1	24	2.2	390.94	edestin 3
1	2	800.454	0.0145	9.1	63700000	26.45	26.45	100	28.92	19	ALPEAVLANAFQISR	2	2	26.45	26.45	800.454	1599.89	0.0145	(R)	ALPEAVLANAFQISR	(D)	Cannabis sativa	Cannabis sativa	CDP79023.1	CDP79026.1|CDP79025.1|CDP79024.1|CDP79023.1	1	3.1	434.31	edestin 1
1	2	705.365	0.0113	8	12000000	14.79	14.79	88.4	12.22	10	EETVLLTSSTSSR	2	2	14.79	14.79	705.365	1409.71	0.0113	(R)	EETVLLTSSTSSR	(R)	Cannabis sativa	Cannabis sativa	CDP79023.1	SNQ45159.1|SNQ45157.1|CDP79026.1|CDP79025.1|CDP79024.1|CDP79023.1	2	3.1	434.31	edestin 1
1	2	914.439	0.0151	8.3	35000000	23.59	23.59	92.4	25.43	14	FYLAGNPEDEFEQLR	2	2	23.59	23.59	914.439	1827.85	0.0151	(R)	FYLAGNPEDEFEQLR	(R)	Cannabis sativa	Cannabis sativa	CDP79023.1	CDP79026.1|CDP79025.1|CDP79024.1|CDP79023.1	3	3.1	434.31	edestin 1
3	2	992.488	0.0136	6.8	49800000	7.22	7.22	53.2	23.13	14	FYLAGNPEDEFEQLRR	2	7	9.41	8.76	992.487	1983.96	0.0114	(R)	FYLAGNPEDEFEQLRR	(E)	Cannabis sativa	Cannabis sativa	CDP79023.1	SNQ45159.1|SNQ45157.1|CDP79026.1|CDP79025.1|CDP79024.1|CDP79023.1	4	3.1	434.31	edestin 1
1	2	1062.51	0.013	6.1	45100000	17.9	17.9	92	26.7	13	GILGVTFPGCPETFEESQR	2	3	23.54	23.54	708.68	2124.01	0.0183	(R)	GILGVTFPGCPETFEESQR	(G)	Cannabis sativa	Cannabis sativa	CDP79023.1	SNQ45159.1|SNQ45157.1|CDP79026.1|CDP79025.1|CDP79024.1|CDP79023.1	5	3.1	434.31	edestin 1
7	2	715.33	0.0102	7.1	23300000	22.56	22.56	93.4	1.53	7	GQGQGQSQGSQPDR	2	15	22.56	22.56	715.33	1429.64	0.0102	(R)	GQGQGQSQGSQPDR	(H)	Cannabis sativa	Cannabis sativa	CDP79023.1	SNQ45159.1|SNQ45157.1|CDP79026.1|CDP79025.1|CDP79024.1|CDP79023.1	6	3.1	434.31	edestin 1
1	2	446.703	0.0088	9.9	3380000	5.29	5.29	46.2	1.47	7	HSSENYR	1	1	5.29	5.29	446.703	892.391	0.0088	(R)	HSSENYR	(N)	Cannabis sativa	Cannabis sativa	CDP79023.1	SNQ45159.1|SNQ45157.1|CDP79026.1|CDP79025.1|CDP79024.1|CDP79023.1	7	3.1	434.31	edestin 1
1	2	745.429	0.0137	9.2	21300000	21.75	21.75	96.3	23.5	14	ISTVNSYNLPILR	2	2	21.75	21.75	745.429	1489.84	0.0137	(R)	ISTVNSYNLPILR	(F)	Cannabis sativa	Cannabis sativa	CDP79023.1	CDP79026.1|CDP79025.1|CDP79024.1|CDP79023.1	8	3.1	434.31	edestin 1
1	2	473.228	0.0092	9.7	1370000	10.5	10.5	70.5	1.8	6	LQGQNDDR	2	2	16.22	16.22	473.227	945.438	0.0086	(R)	LQGQNDDR	(N)	Cannabis sativa	Cannabis sativa	CDP79023.1	SNQ45159.1|SNQ45157.1|CDP79026.1|CDP79025.1|CDP79024.1|CDP79023.1	9	3.1	434.31	edestin 1
1	2	764.9	0.0108	7	7300000	8.89	8.89	57.7	7.05	10	LQGQNDDRNSIIR	2	2	8.89	8.89	764.9	1528.78	0.0108	(R)	LQGQNDDRNSIIR	(V)	Cannabis sativa	Cannabis sativa	CDP79023.1	CDP79024.1|CDP79023.1	10	3.1	434.31	edestin 1
1	2	578.812	0.0092	7.9	33100000	7.67	7.67	74.6	5.38	11	LRENIGDPSR	1	1	7.67	7.67	578.812	1156.61	0.0092	(R)	LRENIGDPSR	(A)	Cannabis sativa	Cannabis sativa	CDP79023.1	SNQ45159.1|SNQ45157.1|CDP79026.1|CDP79025.1|CDP79024.1|CDP79023.1	11	3.1	434.31	edestin 1
3	2	1193.11	0.0107	4.5	5170000	15.69	15.69	83.5	23.75	10	NAIYTPHWNVNAHSVMYVLR	2	6	21.11	21.11	795.742	2385.19	0.0187	(K)	NAIYTPHWNVNAHSVMYVLR	(G)	Cannabis sativa	Cannabis sativa	CDP79023.1	SNQ45159.1|SNQ45157.1|CDP79025.1|CDP79024.1|CDP79023.1	12	3.1	434.31	edestin 1
3	2	744.351	0.0139	9.4	90800000	19.48	19.48	87.9	23.35	14	QASSDGFEWVSFK	2	6	19.48	19.48	744.351	1487.68	0.0139	(K)	QASSDGFEWVSFK	(T)	Cannabis sativa	Cannabis sativa	CDP79023.1	SNQ45159.1|SNQ45157.1|CDP79026.1|CDP79025.1|CDP79024.1|CDP79023.1	13	3.1	434.31	edestin 1
2	2	809.463	0.0126	7.8	70400000	15.32	15.32	85.5	11.15	14	QGQIVTVPQNHAVVK	2	6	15.88	15.88	809.462	1617.91	0.0106	(R)	QGQIVTVPQNHAVVK	(Q)	Cannabis sativa	Cannabis sativa	CDP79023.1	SNQ45159.1|SNQ45157.1|CDP79026.1|CDP79025.1|CDP79024.1|CDP79023.1	14	3.1	434.31	edestin 1
2	2	595.278	0.0115	9.7	25100000	15.21	15.21	84.9	2.82	8	QQNQCQIDR	2	3	17.44	17.44	595.278	1189.54	0.0115	(R)	QQNQCQIDR	(I)	Cannabis sativa	Cannabis sativa	CDP79023.1	SNQ45159.1|SNQ45157.1|CDP79026.1|CDP79025.1|CDP79024.1|CDP79023.1	15	3.1	434.31	edestin 1
2	3	553.611	0.0159	9.6	1770000	11.57	11.57	45.7	7.57	9	QQNQCQIDRIEAR	1	2	11.57	11.57	553.611	1658.8	0.0159	(R)	QQNQCQIDRIEAR	(E)	Cannabis sativa	Cannabis sativa	CDP79023.1	SNQ45159.1|SNQ45157.1|CDP79026.1|CDP79025.1|CDP79024.1|CDP79023.1	16	3.1	434.31	edestin 1
1	2	544.283	0.0095	8.8	566000	7.6	7.6	48.9	2.27	7	QREIEQER	1	1	7.6	7.6	544.283	1087.55	0.0095	(R)	QREIEQER	(R)	Cannabis sativa	Cannabis sativa	CDP79023.1	CDP79024.1|CDP79023.1	17	3.1	434.31	edestin 1
2	2	512.257	0.0097	9.5	807000	6.63	6	53.5	1.5	8	REDRYER	2	4	7.56	6.66	512.256	1023.5	0.0088	(R)	REDRYER	(R)	Cannabis sativa	Cannabis sativa	CDP79023.1	SNQ45159.1|SNQ45157.1|CDP79026.1|CDP79025.1|CDP79024.1|CDP79023.1	18	3.1	434.31	edestin 1
3	3	661.996	0.0167	8.4	69300000	20.95	20.95	97.2	23.12	9	RFYLAGNPEDEFEQLR	2	5	22.83	22.83	661.996	1983.96	0.0181	(R)	RFYLAGNPEDEFEQLR	(R)	Cannabis sativa	Cannabis sativa	CDP79023.1	SNQ45159.1|SNQ45157.1|CDP79026.1|CDP79025.1|CDP79024.1|CDP79023.1	19	3.1	434.31	edestin 1
2	2	551.278	0.0097	8.8	800000	5.53	5.53	59.6	1.53	8	RLQGQNDDR	2	3	7.8	7.8	551.278	1101.54	0.0089	(K)	RLQGQNDDR	(N)	Cannabis sativa	Cannabis sativa	CDP79023.1	SNQ45159.1|SNQ45157.1|CDP79026.1|CDP79025.1|CDP79024.1|CDP79023.1	20	3.1	434.31	edestin 1
3	2	700.856	0.0131	9.4	190000000	15.94	15.94	87.9	17.75	15	TNDNAWVSPLAGR	1	3	15.94	15.94	700.856	1400.69	0.0131	(K)	TNDNAWVSPLAGR	(T)	Cannabis sativa	Cannabis sativa	CDP79023.1	SNQ45159.1|SNQ45157.1|CDP79026.1|CDP79025.1|CDP79024.1|CDP79023.1	21	3.1	434.31	edestin 1
7	3	999.162	0.0242	8.1	48800000	24.39	24.39	98.8	24.25	12	VEAEAGLIESWNPNHNQFQCAGVAVVR	2	12	24.39	24.39	999.162	2995.45	0.0242	(R)	VEAEAGLIESWNPNHNQFQCAGVAVVR	(Y)	Cannabis sativa	Cannabis sativa	CDP79023.1	SNQ45159.1|SNQ45157.1|CDP79025.1|CDP79024.1|CDP79023.1	22	3.1	434.31	edestin 1
2	2	649.401	0.0116	9	16700000	17.54	17.54	86.7	18.23	13	VKGTLDLVSPLR	2	6	17.54	17.54	649.401	1297.78	0.0116	(R)	VKGTLDLVSPLR	(S)	Cannabis sativa	Cannabis sativa	CDP79023.1	SNQ45159.1|SNQ45157.1|CDP79026.1|CDP79025.1|CDP79024.1|CDP79023.1	23	3.1	434.31	edestin 1
1	2	570.308	0.0092	8.1	21600000	7.76	7.76	44.8	4.55	11	VQVVNHMGQK	2	3	18.24	18.24	570.308	1139.6	0.0105	(R)	VQVVNHMGQK	(C)	Cannabis sativa	Cannabis sativa	CDP79023.1	SNQ45159.1|SNQ45157.1|CDP79026.1|CDP79025.1|CDP79023.1	24	3.1	434.31	edestin 1
1	2	822.401	0.0153	9.3	26800000	24.6	24.6	98.5	18.53	11	YLEEAFNVDSETVK	2	2	24.6	24.6	822.401	1643.78	0.0153	(R)	YLEEAFNVDSETVK	(R)	Cannabis sativa	Cannabis sativa	CDP79023.1	SNQ45159.1|SNQ45157.1|CDP79025.1|CDP79024.1|CDP79023.1	25	3.1	434.31	edestin 1
5	2	900.45	0.0122	6.8	49200000	22.17	22.17	87.6	16.13	14	YLEEAFNVDSETVKR	2	9	22.17	22.17	900.45	1799.88	0.0122	(R)	YLEEAFNVDSETVKR	(L)	Cannabis sativa	Cannabis sativa	CDP79023.1	SNQ45159.1|SNQ45157.1|CDP79025.1|CDP79024.1|CDP79023.1	26	3.1	434.31	edestin 1
1	2	609.802	0.0102	8.4	23900000	11.43	11.43	71.6	14.8	14	CPALEMEIQK	2	5	17.89	17.89	609.803	1218.59	0.0122	(R)	CPALEMEIQK	(E)	Cannabis sativa	Cannabis sativa	SNQ45151.1	SNQ45152.1|SNQ45151.1	1	4.1	95.29	Albumin
1	3	635.307	0.0184	9.7	893000	16.64	16.64	69.5	13.2	10	CPALEMEIQKEQGQDK	2	3	16.64	16.64	635.307	1903.89	0.0184	(R)	CPALEMEIQKEQGQDK	(Q)	Cannabis sativa	Cannabis sativa	SNQ45151.1	SNQ45152.1|SNQ45151.1	2	4.1	95.29	Albumin
1	2	645.798	0.0129	10	45300000	14.94	14.94	90.9	13.75	14	NIPSMCGMQPR	1	1	14.94	14.94	645.798	1290.58	0.0129	(R)	NIPSMCGMQPR	(T)	Cannabis sativa	Cannabis sativa	SNQ45151.1	SNQ45152.1|SNQ45151.1	3	4.1	95.29	Albumin
3	2	471.719	0.0093	9.9	4950000	8.99	8.99	63	1.83	7	QDLNHCR	2	5	12.71	12.71	471.719	942.421	0.0091	(R)	QDLNHCR	(M)	Cannabis sativa	Cannabis sativa	SNQ45151.1	SNQ45152.1|SNQ45151.1	4	4.1	95.29	Albumin
1	2	476.698	0.0094	9.9	6080000	20.45	20.45	96.2	1.38	6	SGSEQECR	2	3	20.45	20.45	476.698	952.379	0.0094	(R)	SGSEQECR	(R)	Cannabis sativa	Cannabis sativa	SNQ45151.1	SNQ45152.1|SNQ45151.1	5	4.1	95.29	Albumin
1	2	468.216	0.0092	9.8	2060000	12.66	12.66	70.7	2.25	7	TCQFHSR	1	1	12.66	12.66	468.216	935.415	0.0092	(R)	TCQFHSR	(Y)	Cannabis sativa	Cannabis sativa	SNQ45151.1	SNQ45152.1|SNQ45151.1	6	4.1	95.29	Albumin
1	2	504.297	0.0099	9.8	1200000	17.34	17.34	89.3	16.83	10	ATEYGIILK	1	1	17.34	17.34	504.297	1007.58	0.0099	(K)	ATEYGIILK	(G)	Cannabis sativa	Cannabis sativa	SNQ45153.2	SNQ45153.2	1	5.1	65.5	7S vicilin-like protein
2	2	1016.03	0.0114	5.6	1530000	16.02	16.02	74.8	22.47	10	EILSSQQEGPIVYIPDSR	2	3	16.02	16.02	1016.03	2031.04	0.0114	(K)	EILSSQQEGPIVYIPDSR	(S)	Cannabis sativa	Cannabis sativa	SNQ45153.2	SNQ45153.2	2	5.1	65.5	7S vicilin-like protein
1	2	518.286	0.0103	9.9	1170000	15.48	15.48	91.6	19.83	9	IGFITMEPK	1	1	15.48	15.48	518.286	1035.55	0.0103	(R)	IGFITMEPK	(T)	Cannabis sativa	Cannabis sativa	SNQ45153.2	SNQ45153.2	3	5.1	65.5	7S vicilin-like protein
2	2	885.45	0.0117	6.6	1300000	16.66	16.66	77.9	20.77	11	ISAGSAFYLVNTGEGQR	2	4	16.66	16.66	885.45	1769.88	0.0117	(R)	ISAGSAFYLVNTGEGQR	(L)	Cannabis sativa	Cannabis sativa	SNQ45153.2	SNQ45153.2	4	5.1	65.5	7S vicilin-like protein
1	2	488.285	0.0004	0.4	488000	7.12	7.12	61.5	15.28	11	IGLFGGAGVGK	2	2	7.12	7.12	488.285	975.562	0.0004	(K)	IGLFGGAGVGK	(T)	Cannabis sativa	Cannabis sativa	AEI27419.1	AXX76729.1|YP_009143560.1|ARC99291.1|AQY15329.1|AEI27419.1|YP_009123080.1|AMC30663.1|AKX33555.1|AJK91429.1	1	6.1	7.12	ATP synthase beta subunit, partial (chloroplast)
1	2	639.826	-0.0033	-2.6	571000	5.63	5.97	54.3	24.43	11	LTTHFSNFPSK	1	1	5.63	5.97	639.826	1278.65	-0.0033	(K)	LTTHFSNFPSK	(F)	Cannabis sativa	Cannabis sativa	DAC76714.1	DAC76714.1	1	7.1	5.63	TPA_exp: prenyltransferase 5
1	2	641.813	0.006	4.7	393000	4.29	4.29	55.1	18.47	9	DQIGNDTLNHR	1	1	4.29	4.29	641.813	1282.61	0.006	(R)	DQIGNDTLNHR	(T)	Cannabis sativa	Cannabis sativa|Cannabis sativa subsp. sativa	AJK91464.1	AJK91481.1|AJK91464.1|AKP55236.1|AKP55235.1|AKK32263.1|AKK32262.1	1	8.1	4.29	hypothetical chloroplast RF21 (chloroplast)

## Sheet: Milk thistle
num_Spectra	z	parent_m_over_z	delta_parent_mass	delta_ppm	totalIntensity	score	deltaForwardReverseScore	percent_scored_peak_intensity	retentionTimeMin	chromatographicPeakWidthSec	Sequence	numColumnsSequenceObserved	numSpectraSequenceObserved	bestScore	bestDeltaForwardReverseScore	best_parent_m_over_z	best_matched_parent_mass	best_delta_parent_mass	previous_aa	sequence	next_aa	species	speciesMulti	accession_number	accession_numbers	peptide_num	protein_group_num	protein_score	entry_name
1	2	764.414	0.0124	8.1	6240000	20.74	20.74	94.9	28.93	11	IFELTPEQYIFK	1	1	20.74	20.74	764.414	1527.81	0.0124	(K)	IFELTPEQYIFK	(L)	Silybum marianum		AGE15495.1	AGE15495.1	1	1.1	38.35	preprosilpepsin 2
4	3	772.368	0.0219	9.5	16700000	17.61	17.7	78.4	21.68	10	NVNEEEGGELVFGGVDPNHFR	1	4	17.61	17.7	772.368	2315.07	0.0219	(R)	NVNEEEGGELVFGGVDPNHFR	(G)	Silybum marianum		AGE15495.1	AGE15495.1	2	1.1	38.35	preprosilpepsin 2
1	2	488.284	-0.0004	-0.4	1050000	5.02	5.02	52.4	15.45	11	IGLFGGAGVGK	1	1	5.02	5.02	488.284	975.562	-0.0004	(K)	IGLFGGAGVGK	(T)	Silybum marianum		ALE29259.1	ALE29259.1|YP_009170270.1	1	2.1	5.02	ATP synthase CF1 beta subunit (chloroplast)

## Sheet: Nigella oil
num_Spectra	z	parent_m_over_z	delta_parent_mass	delta_ppm	totalIntensity	score	deltaForwardReverseScore	percent_scored_peak_intensity	retentionTimeMin	chromatographicPeakWidthSec	Sequence	numColumnsSequenceObserved	numSpectraSequenceObserved	bestScore	bestDeltaForwardReverseScore	best_parent_m_over_z	best_matched_parent_mass	best_delta_parent_mass	previous_aa	sequence	next_aa	species	speciesMulti	accession_number	accession_numbers	peptide_num	protein_group_num	protein_score	entry_name
1	2	775.372	0.0091	5.9	1080000	19.82	19.82	85.7	18.88	9	ACIGLCAPACLTSR	2	2	19.82	19.82	775.372	1549.73	0.0091	(R)	ACIGLCAPACLTSR	(-)	Nigella sativa	Nigella sativa	pdb|2NB2|A	pdb|2NB2|A	1	1.1	51.07	Chain A, nigellin-1.1
1	2	673.803	0.0119	8.8	2540000	16.74	16.74	94.1	17.22	9	CTYIPDYAGMR	2	2	17.42	17.42	673.802	1346.59	0.0106	(R)	CTYIPDYAGMR	(A)	Nigella sativa	Nigella sativa	pdb|2NB2|A	pdb|2NB2|A	2	1.1	51.07	Chain A, nigellin-1.1
1	2	716.29	0.0103	7.2	2230000	13.83	13.83	72	6.4	9	YQDCLSECNSR	1	1	13.83	13.83	716.29	1431.56	0.0103	(R)	YQDCLSECNSR	(C)	Nigella sativa	Nigella sativa	pdb|2NB2|A	pdb|2NB2|A	3	1.1	51.07	Chain A, nigellin-1.1
2	2	521.713	0.0078	7.5	1550000	11.29	11.29	53.8	3.47	7	TCSGLCGCK	1	2	11.29	11.29	521.713	1042.41	0.0078	(K)	TCSGLCGCK	(I)	Nigella sativa	Nigella sativa	sp|C0HJH9.1|THNW1_NIGSA	sp|C0HJH9.1|THNW1_NIGSA	1	2.1	11.29	RecName: Full=Thionin NsW1
1	2	488.285	0.0007	0.8	1650000	4.57	4.57	55.9	15.47	12	IGLFGGAGVGK	2	2	5.03	5.03	488.284	975.562	-0.0025	(K)	IGLFGGAGVGK	(T)	Nigella damascena	Nigella damascena	ABW74608.1	YP_009581452.1|QBK49517.1|ABW74608.1	1	3.1	5.03	ATP synthase beta subunit, partial (chloroplast)
1	2	443.761	-0.0066	-7.4	693000	5	5	82.1	17.87	16	IIGASNRR	1	1	5	5	443.761	886.522	-0.0066	(R)	IIGASNRR	(Y)	Nigella damascena	Nigella damascena	QBK49546.1	YP_009581481.1|QBK49546.1	1	4.1	5	ribosomal protein L14 (chloroplast)

## Sheet: Pumpkin oil
num_Spectra	z	parent_m_over_z	delta_parent_mass	delta_ppm	totalIntensity	score	deltaForwardReverseScore	percent_scored_peak_intensity	retentionTimeMin	chromatographicPeakWidthSec	Sequence	numColumnsSequenceObserved	numSpectraSequenceObserved	bestScore	bestDeltaForwardReverseScore	best_parent_m_over_z	best_matched_parent_mass	best_delta_parent_mass	previous_aa	sequence	next_aa	species	speciesMulti	accession_number	accession_numbers	peptide_num	protein_group_num	protein_score	entry_name
2	2	661.373	0.0123	9.3	66000000	23.42	17.46	99	24.45	12	AFPVQVIASAYR	1	2	23.42	17.46	661.373	1321.73	0.0123	(R)	AFPVQVIASAYR	(I)	Cucurbita pepo subsp. pepo	Cucurbita pepo subsp. pepo|Cucurbita maxima|Cucurbita moschata	XP_023553731.1	XP_023553731.1|XP_022967669.1|XP_022963931.1|XP_023532598.1|XP_022995606.1|XP_022930971.1	1	1.1	552.27	11S globulin subunit beta-like
1	2	884.918	0.0119	6.7	9110000	19.2	17.24	88.9	21.95	14	AFYLAGNPEEEFPER	2	2	19.9	16.47	884.919	1768.82	0.0136	(R)	AFYLAGNPEEEFPER	(R)	Cucurbita pepo subsp. pepo	Cucurbita pepo subsp. pepo|Cucurbita maxima	XP_023553731.1	XP_023553731.1|XP_022967669.1	2	1.1	552.27	11S globulin subunit beta-like
1	2	962.97	0.0133	6.9	6420000	8.41	8.41	59.1	19.23	14	AFYLAGNPEEEFPERR	2	4	10.88	10.88	962.97	1924.92	0.0142	(R)	AFYLAGNPEEEFPERR	(S)	Cucurbita pepo subsp. pepo	Cucurbita pepo subsp. pepo|Cucurbita maxima	XP_023553731.1	XP_023553731.1|XP_022967669.1	3	1.1	552.27	11S globulin subunit beta-like
1	2	701.326	0.0116	8.3	9930000	23.85	23.85	98.2	23.8	15	ASDEGFEWVSFK	1	1	23.85	23.85	701.326	1401.63	0.0116	(K)	ASDEGFEWVSFK	(T)	Cucurbita pepo subsp. pepo	Cucurbita pepo subsp. pepo	XP_023553731.1	XP_023553731.1	4	1.1	552.27	11S globulin subunit beta-like
4	3	620.961	0.0178	9.6	9630000	13.15	6.35	83.8	21.65	11	EGSSNKNNIFFAFDDR	1	4	13.15	6.35	620.961	1860.85	0.0178	(R)	EGSSNKNNIFFAFDDR	(V)	Cucurbita pepo subsp. pepo	Cucurbita pepo subsp. pepo|Cucurbita moschata	XP_023553731.1	XP_023553731.1|XP_022963931.1	5	1.1	552.27	11S globulin subunit beta-like
1	4	854.433	0.0341	10	1180000	15.55	12.52	85.6	37.2	12	EGSSNKNNIFFAFDDRVLAEVLNINTEMAR	1	1	15.55	12.52	854.433	3414.67	0.0341	(R)	EGSSNKNNIFFAFDDRVLAEVLNINTEMAR	(K)	Cucurbita pepo subsp. pepo	Cucurbita pepo subsp. pepo|Cucurbita moschata	XP_023553731.1	XP_023553731.1|XP_022963931.1	6	1.1	552.27	11S globulin subunit beta-like
1	2	1039.42	0.0135	6.5	5400000	22.64	22.64	95.5	9.22	11	GDEQQWEEEQEEEQER	2	4	22.64	22.64	1039.42	2077.82	0.0125	(R)	GDEQQWEEEQEEEQER	(A)	Cucurbita pepo subsp. pepo	Cucurbita pepo subsp. pepo|Cucurbita maxima|Cucurbita moschata	XP_023553731.1	XP_023553731.1|XP_022967669.1|XP_022963931.1	7	1.1	552.27	11S globulin subunit beta-like
4	3	866.367	0.0217	8.4	7390000	17.68	18.25	90.8	12.02	10	GDEQQWEEEQEEEQERAYER	1	4	17.68	18.25	866.367	2597.07	0.0217	(R)	GDEQQWEEEQEEEQERAYER	(S)	Cucurbita pepo subsp. pepo	Cucurbita pepo subsp. pepo|Cucurbita moschata	XP_023553731.1	XP_023553731.1|XP_022963931.1	8	1.1	552.27	11S globulin subunit beta-like
4	3	826.02	0.0206	8.3	13600000	22.47	22.47	91.2	7.67	10	GGQRGDEQQWEEEQEEEQER	2	6	22.47	22.47	826.02	2476.02	0.0206	(R)	GGQRGDEQQWEEEQEEEQER	(A)	Cucurbita pepo subsp. pepo	Cucurbita pepo subsp. pepo|Cucurbita maxima|Cucurbita moschata	XP_023553731.1	XP_023553731.1|XP_022967669.1|XP_022963931.1	9	1.1	552.27	11S globulin subunit beta-like
1	2	689.348	0.0129	9.4	21200000	20.23	17.05	91.6	13.73	11	GQTVFDGELQQR	2	3	20.23	17.05	689.348	1377.68	0.0129	(R)	GQTVFDGELQQR	(Q)	Cucurbita pepo subsp. pepo	Cucurbita pepo subsp. pepo|Cucurbita maxima|Cucurbita moschata	XP_023553731.1	XP_023553731.1|XP_022967669.1|XP_022963931.1	10	1.1	552.27	11S globulin subunit beta-like
2	2	1215.06	0.0143	5.9	9600000	27.02	27.02	95	17.1	10	GVVLSGCPETYQESQQSAGEFR	2	6	27.02	27.02	1215.06	2429.1	0.0143	(K)	GVVLSGCPETYQESQQSAGEFR	(D)	Cucurbita pepo subsp. pepo	Cucurbita pepo subsp. pepo|Cucurbita maxima|Cucurbita moschata	XP_023553731.1	XP_023553731.1|XP_022967669.1|XP_022963931.1	11	1.1	552.27	11S globulin subunit beta-like
1	3	900.756	0.0228	8.4	915000	14.69	14.16	82.5	15.13	9	GVVLSGCPETYQESQQSAGEFRDR	1	1	14.69	14.16	900.756	2700.23	0.0228	(K)	GVVLSGCPETYQESQQSAGEFRDR	(H)	Cucurbita pepo subsp. pepo	Cucurbita pepo subsp. pepo|Cucurbita maxima	XP_023553731.1	XP_023553731.1|XP_022967669.1	12	1.1	552.27	11S globulin subunit beta-like
1	3	1040.48	0.0298	9.5	9000000	26.85	23	95.8	26.82	9	IEAEGGVIEMWDPNHEEFQCAGVAFQR	1	1	26.85	23	1040.48	3119.4	0.0298	(R)	IEAEGGVIEMWDPNHEEFQCAGVAFQR	(Y)	Cucurbita pepo subsp. pepo	Cucurbita pepo subsp. pepo|Cucurbita maxima|Cucurbita moschata	XP_023553731.1	XP_023553731.1|XP_022967669.1|XP_022963931.1	13	1.1	552.27	11S globulin subunit beta-like
4	2	765.373	0.012	7.8	20000000	16.2	11.44	78.2	20.82	11	KASDEGFEWVSFK	2	8	18.79	13.12	765.374	1529.73	0.0135	(K)	KASDEGFEWVSFK	(T)	Cucurbita pepo subsp. pepo	Cucurbita pepo subsp. pepo|Cucurbita maxima|Cucurbita moschata	XP_023553731.1	XP_023553731.1|XP_022967669.1|XP_022963931.1	14	1.1	552.27	11S globulin subunit beta-like
2	2	699.877	0.0131	9.4	52300000	12.31	9.81	73.5	12.63	13	LDRLDALEPSNR	2	4	12.31	9.81	699.877	1398.73	0.0131	(R)	LDRLDALEPSNR	(I)	Cucurbita pepo subsp. pepo	Cucurbita pepo subsp. pepo|Cucurbita maxima|Cucurbita moschata	XP_023553731.1	XP_023553731.1|XP_023532598.1|XP_022967669.1|XP_022930971.1|XP_022963931.1	15	1.1	552.27	11S globulin subunit beta-like
3	3	805.125	0.0241	10	17700000	20.35	20.96	94	31.4	18	LIIVVLLDVSNHANQLDFHPR	2	4	21.4	19.96	805.123	2413.34	0.0188	(K)	LIIVVLLDVSNHANQLDFHPR	(A)	Cucurbita pepo subsp. pepo	Cucurbita pepo subsp. pepo|Cucurbita moschata	XP_023553731.1	XP_023553731.1|XP_022963931.1	16	1.1	552.27	11S globulin subunit beta-like
2	2	551.801	0.01	9.1	18600000	12.79	7.52	79.1	4.28	8	LKENIGDASR	1	2	12.79	7.52	551.801	1102.59	0.01	(R)	LKENIGDASR	(A)	Cucurbita pepo subsp. pepo	Cucurbita pepo subsp. pepo|Cucurbita maxima|Cucurbita moschata	XP_023553731.1	XP_023553731.1|XP_023532598.1|XP_022967669.1|XP_022995606.1|XP_022930971.1|XP_022963931.1	17	1.1	552.27	11S globulin subunit beta-like
1	3	726.045	0.02	9.2	308000	9.79	9.79	56.8	12.52	9	LKENIGDASRADIYTPEAGR	1	1	9.79	9.79	726.045	2176.1	0.02	(R)	LKENIGDASRADIYTPEAGR	(L)	Cucurbita pepo subsp. pepo	Cucurbita pepo subsp. pepo	XP_023553731.1	XP_023553731.1	18	1.1	552.27	11S globulin subunit beta-like
4	3	795.402	0.0203	8.5	12700000	19.14	17.2	83.6	20.97	14	NAMYVPHWNQNAHSVIFVTR	2	9	21.04	16.75	795.403	2384.17	0.0234	(R)	NAMYVPHWNQNAHSVIFVTR	(G)	Cucurbita pepo subsp. pepo	Cucurbita pepo subsp. pepo|Cucurbita maxima|Cucurbita moschata	XP_023553731.1	XP_023553731.1|XP_022967669.1|XP_022963931.1	19	1.1	552.27	11S globulin subunit beta-like
4	2	934.049	0.0104	5.6	7810000	15.33	15.5	78.9	18.65	23	NIIKVEGQFEVIKPPR	2	5	15.33	15.5	934.049	1867.08	0.0104	(R)	NIIKVEGQFEVIKPPR	(S)	Cucurbita pepo subsp. pepo	Cucurbita pepo subsp. pepo|Cucurbita maxima|Cucurbita moschata	XP_023553731.1	XP_023553731.1|XP_022967669.1|XP_022963931.1	20	1.1	552.27	11S globulin subunit beta-like
1	2	629.802	0.0124	9.9	29800000	14.57	12.09	91.2	25.45	12	NNIFFAFDDR	1	1	14.57	12.09	629.802	1258.59	0.0124	(K)	NNIFFAFDDR	(V)	Cucurbita pepo subsp. pepo	Cucurbita pepo subsp. pepo|Cucurbita moschata	XP_023553731.1	XP_023553731.1|XP_022963931.1	21	1.1	552.27	11S globulin subunit beta-like
1	2	734.955	0.0143	9.7	59800000	14.41	14.05	87.7	27.57	13	QLLVVPQNFALVK	1	1	14.41	14.05	734.955	1468.89	0.0143	(R)	QLLVVPQNFALVK	(K)	Cucurbita pepo subsp. pepo	Cucurbita maxima|Cucurbita pepo subsp. pepo|Cucurbita moschata	XP_023553731.1	XP_022967669.1|XP_023553731.1|XP_022963931.1	22	1.1	552.27	11S globulin subunit beta-like
3	2	799.001	0.012	7.5	12400000	14.15	14.15	82.1	23.42	10	QLLVVPQNFALVKK	1	3	14.15	14.15	799.001	1596.98	0.012	(R)	QLLVVPQNFALVKK	(A)	Cucurbita pepo subsp. pepo	Cucurbita maxima|Cucurbita pepo subsp. pepo|Cucurbita moschata	XP_023553731.1	XP_022967669.1|XP_023553731.1|XP_022963931.1	23	1.1	552.27	11S globulin subunit beta-like
3	2	584.788	0.0097	8.3	4040000	17.69	8.07	88.1	1.53	7	SEYKQEQTR	2	7	20.87	13.8	584.788	1168.56	0.0102	(R)	SEYKQEQTR	(H)	Cucurbita pepo subsp. pepo	Cucurbita pepo subsp. pepo	XP_023553731.1	XP_023553731.1	24	1.1	552.27	11S globulin subunit beta-like
4	3	784.036	0.0198	8.4	26000000	16.46	12.5	93.7	21	12	TGDLFAVPAGSAHWTYNDGNEK	2	8	16.46	12.5	784.036	2350.07	0.0198	(R)	TGDLFAVPAGSAHWTYNDGNEK	(L)	Cucurbita pepo subsp. pepo	Cucurbita pepo subsp. pepo|Cucurbita maxima|Cucurbita moschata	XP_023553731.1	XP_023553731.1|XP_022967669.1|XP_022963931.1	25	1.1	552.27	11S globulin subunit beta-like
2	5	949.692	0.038	8	5330000	14.05	10.15	72	37.23	15	TGDLFAVPAGSAHWTYNDGNEKLIIVVLLDVSNHANQLDFHPR	1	2	14.05	10.15	949.692	4744.39	0.038	(R)	TGDLFAVPAGSAHWTYNDGNEKLIIVVLLDVSNHANQLDFHPR	(A)	Cucurbita pepo subsp. pepo	Cucurbita pepo subsp. pepo|Cucurbita moschata	XP_023553731.1	XP_023553731.1|XP_022963931.1	26	1.1	552.27	11S globulin subunit beta-like
2	2	687.352	0.0135	9.9	48500000	18.97	18.97	95.9	15.48	13	TNDNAMITPLAGR	1	2	18.97	18.97	687.352	1373.68	0.0135	(K)	TNDNAMITPLAGR	(T)	Cucurbita pepo subsp. pepo	Cucurbita pepo subsp. pepo|Cucurbita moschata	XP_023553731.1	XP_023553731.1|XP_022963931.1	27	1.1	552.27	11S globulin subunit beta-like
6	2	699.897	0.0123	8.8	46200000	19.58	19.58	90	14.53	18	VEGQFEVIKPPR	2	13	25.13	22.87	699.897	1398.77	0.0131	(K)	VEGQFEVIKPPR	(S)	Cucurbita pepo subsp. pepo	Cucurbita pepo subsp. pepo|Cucurbita maxima|Cucurbita moschata	XP_023553731.1	XP_023553731.1|XP_022967669.1|XP_022963931.1	28	1.1	552.27	11S globulin subunit beta-like
1	2	786.932	0.0149	9.5	61800000	22.81	16.32	98.1	23.2	13	VLAEVLNINTEMAR	2	2	22.81	16.32	786.932	1572.84	0.0149	(R)	VLAEVLNINTEMAR	(K)	Cucurbita pepo subsp. pepo	Cucurbita pepo subsp. pepo|Cucurbita moschata	XP_023553731.1	XP_023553731.1|XP_022963931.1	29	1.1	552.27	11S globulin subunit beta-like
2	3	730.376	0.0201	9.2	14300000	21.07	16.25	90	16.52	10	VQVVDDRGQTVFDGELQQR	2	3	21.07	16.25	730.376	2189.09	0.0201	(R)	VQVVDDRGQTVFDGELQQR	(Q)	Cucurbita pepo subsp. pepo	Cucurbita pepo subsp. pepo|Cucurbita maxima|Cucurbita moschata	XP_023553731.1	XP_023553731.1|XP_022967669.1|XP_022963931.1	30	1.1	552.27	11S globulin subunit beta-like
2	2	661.373	0.0123	9.3	66000000	23.42	17.46	99	24.45	12	AFPVQVLASAYR	1	2	23.42	17.46	661.373	1321.73	0.0123	(R)	AFPVQVLASAYR	(I)	Cucurbita pepo subsp. pepo	Cucurbita maxima|Cucurbita moschata|Cucurbita pepo subsp. pepo	XP_023532598.1	XP_023553731.1|XP_022967669.1|XP_022963931.1|XP_023532598.1|XP_022995606.1|XP_022930971.1	1	1.2	497.25	11S globulin subunit beta-like
6	2	1153.53	0.0132	5.7	49900000	16.59	13.74	83.6	20.72	12	AGDLFAVPAGSAHWSYNDGNEK	2	12	18.35	16.17	1153.54	2306.05	0.0174	(R)	AGDLFAVPAGSAHWSYNDGNEK	(L)	Cucurbita pepo subsp. pepo	Cucurbita pepo subsp. pepo|Cucurbita maxima|Cucurbita moschata	XP_023532598.1	XP_023532598.1|XP_022995606.1|XP_022930971.1	2	1.2	497.25	11S globulin subunit beta-like
2	2	708.334	0.0129	9.1	9220000	23.63	19.29	98.4	23.65	15	ASEEGFEWVSFK	1	2	23.63	19.29	708.334	1415.65	0.0129	(K)	ASEEGFEWVSFK	(T)	Cucurbita pepo subsp. pepo	Cucurbita pepo subsp. pepo|Cucurbita maxima|Cucurbita moschata	XP_023532598.1	XP_023532598.1|XP_022995606.1|XP_022930971.1	3	1.2	497.25	11S globulin subunit beta-like
2	3	645.996	0.0132	6.8	10100000	12.16	4.3	85.2	17.02	26	FNREETTLLPPSMSSAR	1	2	12.16	4.3	645.996	1935.96	0.0132	(K)	FNREETTLLPPSMSSAR	(R)	Cucurbita pepo subsp. pepo	Cucurbita pepo subsp. pepo|Cucurbita maxima	XP_023532598.1	XP_023532598.1|XP_022995606.1	4	1.2	497.25	11S globulin subunit beta-like
2	3	712.308	0.0202	9.4	15900000	17.01	12.46	83.7	6.92	11	GDEREWEEEQEEERER	2	3	17.01	12.46	712.308	2134.89	0.0202	(R)	GDEREWEEEQEEERER	(E)	Cucurbita pepo subsp. pepo	Cucurbita pepo subsp. pepo|Cucurbita moschata	XP_023532598.1	XP_023532598.1|XP_022930971.1	5	1.2	497.25	11S globulin subunit beta-like
1	2	697.345	0.0118	8.5	11700000	18.66	18.74	94.8	9.8	9	GQTVYDGELQQR	2	2	19.76	18.67	697.346	1393.67	0.0131	(R)	GQTVYDGELQQR	(Q)	Cucurbita pepo subsp. pepo	Cucurbita pepo subsp. pepo|Cucurbita maxima|Cucurbita moschata	XP_023532598.1	XP_023532598.1|XP_022995606.1|XP_022930971.1	6	1.2	497.25	11S globulin subunit beta-like
3	3	837.4	0.0229	9.1	4490000	20.94	17.86	89.4	19.35	10	GVVLPGCPETYQESQQSAQEFR	2	4	24.1	20.13	1255.59	2510.16	0.0149	(K)	GVVLPGCPETYQESQQSAQEFR	(D)	Cucurbita pepo subsp. pepo	Cucurbita pepo subsp. pepo|Cucurbita maxima|Cucurbita moschata	XP_023532598.1	XP_023532598.1|XP_022995606.1|XP_022930971.1	7	1.2	497.25	11S globulin subunit beta-like
3	3	1024.16	0.0216	7	11400000	21.44	18.87	86.8	28.83	13	IEAEGGVIEIWDPNHEMFECAGVAIQR	1	3	21.44	18.87	1024.16	3070.44	0.0216	(R)	IEAEGGVIEIWDPNHEMFECAGVAIQR	(Y)	Cucurbita pepo subsp. pepo	Cucurbita pepo subsp. pepo|Cucurbita maxima|Cucurbita moschata	XP_023532598.1	XP_023532598.1|XP_022995606.1|XP_022930971.1	8	1.2	497.25	11S globulin subunit beta-like
1	2	772.381	0.0118	7.6	1160000	7.39	7.39	44.7	20.48	10	KASEEGFEWVSFK	1	1	7.39	7.39	772.381	1543.74	0.0118	(K)	KASEEGFEWVSFK	(T)	Cucurbita pepo subsp. pepo	Cucurbita pepo subsp. pepo|Cucurbita moschata	XP_023532598.1	XP_023532598.1|XP_022930971.1	9	1.2	497.25	11S globulin subunit beta-like
1	3	631.308	0.017	9	1240000	12.68	10.45	79.3	11.58	12	KGSSNKNNIFYAYDDR	1	1	12.68	10.45	631.308	1891.89	0.017	(R)	KGSSNKNNIFYAYDDR	(V)	Cucurbita pepo subsp. pepo	Cucurbita pepo subsp. pepo|Cucurbita moschata	XP_023532598.1	XP_023532598.1|XP_022930971.1	10	1.2	497.25	11S globulin subunit beta-like
2	2	699.877	0.0131	9.4	52300000	12.31	9.81	73.5	12.63	13	LDRLDALEPSNR	2	4	12.31	9.81	699.877	1398.73	0.0131	(R)	LDRLDALEPSNR	(I)	Cucurbita pepo subsp. pepo	Cucurbita pepo subsp. pepo|Cucurbita maxima|Cucurbita moschata	XP_023532598.1	XP_023553731.1|XP_023532598.1|XP_022967669.1|XP_022930971.1|XP_022963931.1	11	1.2	497.25	11S globulin subunit beta-like
5	2	1181.65	0.0145	6.1	52800000	21.45	17.71	87.2	31.25	14	LIAIVLLDVSNNANQLDFHPR	2	9	27.25	23.32	788.109	2362.29	0.0234	(K)	LIAIVLLDVSNNANQLDFHPR	(T)	Cucurbita pepo subsp. pepo	Cucurbita pepo subsp. pepo|Cucurbita moschata	XP_023532598.1	XP_023532598.1|XP_022930971.1	12	1.2	497.25	11S globulin subunit beta-like
2	2	551.801	0.01	9.1	18600000	12.79	7.52	79.1	4.28	8	LKENIGDASR	1	2	12.79	7.52	551.801	1102.59	0.01	(R)	LKENIGDASR	(A)	Cucurbita pepo subsp. pepo	Cucurbita pepo subsp. pepo|Cucurbita maxima|Cucurbita moschata	XP_023532598.1	XP_023553731.1|XP_023532598.1|XP_022967669.1|XP_022995606.1|XP_022930971.1|XP_022963931.1	13	1.2	497.25	11S globulin subunit beta-like
1	3	726.045	0.02	9.2	308000	9.79	9.79	56.8	12.52	9	LKENIGDASRADIYTPEAGR	1	1	9.79	9.79	726.045	2176.1	0.02	(R)	LKENIGDASRADIYTPEAGR	(L)	Cucurbita pepo subsp. pepo	Cucurbita pepo subsp. pepo|Cucurbita maxima|Cucurbita moschata	XP_023532598.1	XP_023532598.1|XP_022967669.1|XP_022995606.1|XP_022930971.1|XP_022963931.1	14	1.2	497.25	11S globulin subunit beta-like
1	3	726.391	0.0199	9.1	1790000	15.11	8.9	93.6	17.55	17	LKFNREETTLLPPSMSSAR	1	1	15.11	8.9	726.391	2177.14	0.0199	(R)	LKFNREETTLLPPSMSSAR	(R)	Cucurbita pepo subsp. pepo	Cucurbita pepo subsp. pepo|Cucurbita maxima	XP_023532598.1	XP_023532598.1|XP_022995606.1	15	1.2	497.25	11S globulin subunit beta-like
1	2	451.232	0.0083	9.2	374000	15.54	10.01	78	1.32	7	LSSTNSHR	1	1	15.54	10.01	451.232	901.449	0.0083	(R)	LSSTNSHR	(F)	Cucurbita pepo subsp. pepo	Cucurbita pepo subsp. pepo|Cucurbita maxima|Cucurbita moschata	XP_023532598.1	XP_023532598.1|XP_022995606.1|XP_022930971.1	16	1.2	497.25	11S globulin subunit beta-like
3	3	796.397	0.023	9.6	5570000	17.38	12.82	83.2	23.83	12	NAMYVPHWNMNAHSVIFVTR	2	5	18.42	18.42	1194.09	2387.15	0.0147	(R)	NAMYVPHWNMNAHSVIFVTR	(G)	Cucurbita pepo subsp. pepo	Cucurbita pepo subsp. pepo|Cucurbita maxima|Cucurbita moschata	XP_023532598.1	XP_023532598.1|XP_022995606.1|XP_022930971.1	17	1.2	497.25	11S globulin subunit beta-like
1	2	727.946	0.0117	8.1	16700000	16.17	10.53	88.5	26.67	10	QLLVVPQNFGIVK	1	1	16.17	10.53	727.946	1454.87	0.0117	(R)	QLLVVPQNFGIVK	(K)	Cucurbita pepo subsp. pepo	Cucurbita pepo subsp. pepo|Cucurbita maxima|Cucurbita moschata	XP_023532598.1	XP_023532598.1|XP_022995606.1|XP_022930971.1	18	1.2	497.25	11S globulin subunit beta-like
2	2	791.994	0.0136	8.6	10600000	12.22	5.61	80.9	22.58	10	QLLVVPQNFGIVKK	2	4	12.22	5.61	791.994	1582.97	0.0136	(R)	QLLVVPQNFGIVKK	(A)	Cucurbita pepo subsp. pepo	Cucurbita pepo subsp. pepo|Cucurbita moschata	XP_023532598.1	XP_023532598.1|XP_022930971.1	19	1.2	497.25	11S globulin subunit beta-like
2	2	959.434	0.0115	6	11100000	22.92	22.92	98.7	22.48	11	TFYLAGNPEEEFEESR	2	3	22.92	22.92	959.434	1917.85	0.0115	(R)	TFYLAGNPEEEFEESR	(S)	Cucurbita pepo subsp. pepo	Cucurbita pepo subsp. pepo|Cucurbita moschata	XP_023532598.1	XP_023532598.1|XP_022930971.1	20	1.2	497.25	11S globulin subunit beta-like
1	3	759.349	0.021	9.2	14000000	14.61	14.61	90.5	20.4	11	TFYLAGNPEEEFEESRSDR	1	1	14.61	14.61	759.349	2276.01	0.021	(R)	TFYLAGNPEEEFEESRSDR	(E)	Cucurbita pepo subsp. pepo	Cucurbita pepo subsp. pepo	XP_023532598.1	XP_023532598.1	21	1.2	497.25	11S globulin subunit beta-like
1	3	854.396	0.0196	7.7	958000	16.97	16.97	90.4	18.72	13	TFYLAGNPEEEFEESRSDRER	1	1	16.97	16.97	854.396	2561.15	0.0196	(R)	TFYLAGNPEEEFEESRSDRER	(E)	Cucurbita pepo subsp. pepo	Cucurbita pepo subsp. pepo|Cucurbita moschata	XP_023532598.1	XP_023532598.1|XP_022930971.1	22	1.2	497.25	11S globulin subunit beta-like
1	2	694.36	0.0126	9.1	17100000	19.73	20.38	92.2	15.63	11	TNDQAMITPLAGR	1	1	19.73	20.38	694.36	1387.7	0.0126	(K)	TNDQAMITPLAGR	(T)	Cucurbita pepo subsp. pepo	Cucurbita pepo subsp. pepo	XP_023532598.1	XP_023532598.1	23	1.2	497.25	11S globulin subunit beta-like
8	2	683.396	0.0119	8.7	32900000	22.32	19.81	92.3	14.6	32	VEGELEVIKPPR	2	15	22.32	19.81	683.396	1365.77	0.0119	(K)	VEGELEVIKPPR	(S)	Cucurbita pepo subsp. pepo	Cucurbita pepo subsp. pepo|Cucurbita maxima|Cucurbita moschata	XP_023532598.1	XP_023532598.1|XP_022995606.1|XP_022930971.1	24	1.2	497.25	11S globulin subunit beta-like
1	2	794.944	0.0118	7.4	17700000	26.97	21.21	100	26.77	12	VLAEIFNINVETAR	2	2	26.97	21.21	794.944	1588.87	0.0118	(R)	VLAEIFNINVETAR	(K)	Cucurbita pepo subsp. pepo	Cucurbita pepo subsp. pepo|Cucurbita maxima|Cucurbita moschata	XP_023532598.1	XP_023532598.1|XP_022995606.1|XP_022930971.1	25	1.2	497.25	11S globulin subunit beta-like
2	3	735.708	0.0199	9	5430000	17.81	14.52	90.7	13.33	10	VQVVDDRGQTVYDGELQQR	1	2	17.81	14.52	735.708	2205.09	0.0199	(R)	VQVVDDRGQTVYDGELQQR	(Q)	Cucurbita pepo subsp. pepo	Cucurbita pepo subsp. pepo|Cucurbita maxima|Cucurbita moschata	XP_023532598.1	XP_023532598.1|XP_022995606.1|XP_022930971.1	26	1.2	497.25	11S globulin subunit beta-like
1	2	501.777	0.01	9.9	411000	11.16	4.79	62.5	16.55	10	WLQLSAER	1	1	11.16	4.79	501.777	1002.54	0.01	(R)	WLQLSAER	(G)	Cucurbita pepo subsp. pepo	Cucurbita pepo subsp. pepo	XP_023532598.1	XP_023532598.1	27	1.2	497.25	11S globulin subunit beta-like
2	3	686.712	0.0202	9.8	38800000	22.83	19.56	97.8	28.13	13	YIIDPNGLLLPQYTNAPR	2	4	25.22	22.95	1029.56	2058.1	0.0145	(R)	YIIDPNGLLLPQYTNAPR	(L)	Cucurbita pepo subsp. pepo	Cucurbita pepo subsp. pepo|Cucurbita maxima|Cucurbita moschata	XP_023532598.1	XP_023532598.1|XP_022995606.1|XP_022930971.1	28	1.2	497.25	11S globulin subunit beta-like
4	3	1224.26	0.02	5.4	25000000	21.26	21.26	87.7	26.42	10	APIKLESQTPVYNNQYGQMFEACPDEFPQLR	2	6	24.4	24.4	1224.26	3670.73	0.0308	(R)	APIKLESQTPVYNNQYGQMFEACPDEFPQLR	(R)	Cucurbita pepo subsp. pepo	Cucurbita pepo subsp. pepo|Cucurbita maxima|Cucurbita moschata	XP_023527143.1	XP_023527143.1|XP_022979465.1|XP_022979464.1|XP_022956153.1|BAA34056.1	1	2.1	408.19	vicilin-like
2	4	957.466	0.0105	2.7	3680000	21.97	21.73	91.5	24.37	9	APIKLESQTPVYNNQYGQMFEACPDEFPQLRR	1	2	21.97	21.73	957.466	3826.83	0.0105	(R)	APIKLESQTPVYNNQYGQMFEACPDEFPQLRR	(T)	Cucurbita pepo subsp. pepo	Cucurbita pepo subsp. pepo|Cucurbita maxima|Cucurbita moschata	XP_023527143.1	XP_023527143.1|XP_022979465.1|XP_022979464.1|XP_022956153.1|BAA34056.1	2	2.1	408.19	vicilin-like
1	2	545.317	0.0107	9.8	16800000	19.05	15.92	92.5	10.75	9	ATITTVVQEK	1	1	19.05	15.92	545.317	1089.62	0.0107	(R)	ATITTVVQEK	(R)	Cucurbita pepo subsp. pepo	Cucurbita pepo subsp. pepo|Cucurbita maxima	XP_023527143.1	XP_023527143.1|XP_022979465.1	3	2.1	408.19	vicilin-like
1	3	1055.83	0.0172	5.4	1120000	25.56	25.09	91.6	30.03	11	ATWVVFVSEGAGSFEMACPHIQSGQWQR	1	1	25.56	25.09	1055.83	3165.47	0.0172	(R)	ATWVVFVSEGAGSFEMACPHIQSGQWQR	(G)	Cucurbita pepo subsp. pepo	Cucurbita pepo subsp. pepo|Cucurbita moschata	XP_023527143.1	XP_023527143.1|XP_022956153.1	4	2.1	408.19	vicilin-like
2	3	1045.18	0.0195	6.2	8330000	25.1	25.1	97.5	40.5	14	DYLSAGGEAQAYYSVFSNDVLEAALNIPR	1	2	25.1	25.1	1045.18	3133.51	0.0195	(K)	DYLSAGGEAQAYYSVFSNDVLEAALNIPR	(D)	Cucurbita pepo subsp. pepo	Cucurbita pepo subsp. pepo|Cucurbita moschata	XP_023527143.1	XP_023527143.1|XP_022956153.1	5	2.1	408.19	vicilin-like
2	2	731.36	0.0119	8.1	3340000	11.07	7.2	63.7	15.6	10	ENIMNELDREAK	2	4	11.07	7.79	731.359	1461.7	0.011	(R)	ENIMNELDREAK	(E)	Cucurbita pepo subsp. pepo	Cucurbita pepo subsp. pepo|Cucurbita maxima|Cucurbita moschata	XP_023527143.1	XP_023527143.1|XP_022979465.1|XP_022979464.1|XP_022956153.1|BAA34056.1	6	2.1	408.19	vicilin-like
3	4	613.062	0.0218	8.9	5090000	17.71	13.16	82.8	30.08	11	ENIMNELDREAKELAFNVEGK	1	3	17.71	13.16	613.062	2449.2	0.0218	(R)	ENIMNELDREAKELAFNVEGK	(Q)	Cucurbita pepo subsp. pepo	Cucurbita pepo subsp. pepo|Cucurbita maxima|Cucurbita moschata	XP_023527143.1	XP_023527143.1|XP_022979465.1|XP_022979464.1|XP_022956153.1|BAA34056.1	7	2.1	408.19	vicilin-like
1	2	656.799	0.011	8.4	611000	17.97	15.3	87.2	14.95	9	ESFFTEGPEGGR	2	2	18.97	17.75	656.8	1312.58	0.0128	(R)	ESFFTEGPEGGR	(R)	Cucurbita pepo subsp. pepo	Cucurbita pepo subsp. pepo|Cucurbita maxima|Cucurbita moschata	XP_023527143.1	XP_023527143.1|XP_022979465.1|XP_022979464.1|XP_022956153.1|BAA34056.1	8	2.1	408.19	vicilin-like
2	4	1039.77	0.0363	8.7	2370000	13.37	12.87	84.6	26.85	7	ETRKESYNVESGDVMTIPAGTTLYLANQENEDLQIVK	1	2	13.37	12.87	1039.77	4156.04	0.0363	(R)	ETRKESYNVESGDVMTIPAGTTLYLANQENEDLQIVK	(L)	Cucurbita pepo subsp. pepo	Cucurbita pepo subsp. pepo|Cucurbita maxima|Cucurbita moschata	XP_023527143.1	XP_023527143.1|XP_022979465.1|XP_022979464.1|XP_022956153.1|BAA34056.1	9	2.1	408.19	vicilin-like
1	2	651.879	0.0127	9.8	731000	6.5	12.92	71.8	8.65	10	GRATITTVVQEK	1	1	6.5	12.92	651.879	1302.74	0.0127	(R)	GRATITTVVQEK	(R)	Cucurbita pepo subsp. pepo	Cucurbita pepo subsp. pepo|Cucurbita maxima|Cucurbita moschata	XP_023527143.1	XP_023527143.1|XP_022979465.1|XP_022979464.1|XP_022956153.1|BAA34056.1	10	2.1	408.19	vicilin-like
2	4	996.494	0.0331	8.3	2250000	14.68	14.68	78.9	25.2	10	GVRAPIKLESQTPVYNNQYGQMFEACPDEFPQLR	1	2	14.68	14.68	996.494	3982.92	0.0331	(R)	GVRAPIKLESQTPVYNNQYGQMFEACPDEFPQLR	(R)	Cucurbita pepo subsp. pepo	Cucurbita pepo subsp. pepo|Cucurbita maxima|Cucurbita moschata	XP_023527143.1	XP_023527143.1|XP_022979465.1|XP_022979464.1|XP_022956153.1|BAA34056.1	11	2.1	408.19	vicilin-like
4	3	1257.29	0.0192	5.1	11400000	19.01	16.43	88.9	28.23	11	KESYNVESGDVMTIPAGTTLYLANQENEDLQIVK	2	8	22.81	22.81	1257.3	3769.85	0.0274	(R)	KESYNVESGDVMTIPAGTTLYLANQENEDLQIVK	(L)	Cucurbita pepo subsp. pepo	Cucurbita pepo subsp. pepo|Cucurbita maxima|Cucurbita moschata	XP_023527143.1	XP_023527143.1|XP_022979465.1|XP_022979464.1|XP_022956153.1|BAA34056.1	12	2.1	408.19	vicilin-like
5	3	1087.83	0.0224	6.9	7910000	21.5	23.57	86.4	26.85	9	LESQTPVYNNQYGQMFEACPDEFPQLR	1	5	21.5	23.57	1087.83	3261.46	0.0224	(K)	LESQTPVYNNQYGQMFEACPDEFPQLR	(R)	Cucurbita pepo subsp. pepo	Cucurbita pepo subsp. pepo|Cucurbita maxima|Cucurbita moschata	XP_023527143.1	XP_023527143.1|XP_022979465.1|XP_022979464.1|XP_022956153.1|BAA34056.1	13	2.1	408.19	vicilin-like
5	3	885.822	0.0217	8.2	58500000	25.27	22.65	96.6	26.48	11	LSEGGVLVIPAGHPIAIMASPNENLR	2	9	25.27	22.65	885.822	2655.43	0.0217	(R)	LSEGGVLVIPAGHPIAIMASPNENLR	(L)	Cucurbita pepo subsp. pepo	Cucurbita pepo subsp. pepo|Cucurbita maxima|Cucurbita moschata	XP_023527143.1	XP_023527143.1|XP_022979465.1|XP_022979464.1|XP_022956153.1|BAA34056.1	14	2.1	408.19	vicilin-like
1	2	709.369	0.0132	9.3	10900000	20.4	17.32	93	16.3	11	LVGFGINAENNNR	2	2	20.9	17.65	709.369	1417.72	0.0122	(R)	LVGFGINAENNNR	(N)	Cucurbita pepo subsp. pepo	Cucurbita pepo subsp. pepo	XP_023527143.1	XP_023527143.1	15	2.1	408.19	vicilin-like
1	3	692.7	0.0123	5.9	462000	15.25	10.01	86.6	20.95	10	LVGFGINAENNNRNFLAGR	1	1	15.25	10.01	692.7	2076.07	0.0123	(R)	LVGFGINAENNNRNFLAGR	(E)	Cucurbita pepo subsp. pepo	Cucurbita pepo subsp. pepo	XP_023527143.1	XP_023527143.1	16	2.1	408.19	vicilin-like
1	2	671.367	0.0109	8.1	1820000	18.02	12.79	90	13.52	8	LVQPVNNPGEFK	2	2	18.4	10.78	671.368	1341.72	0.0119	(K)	LVQPVNNPGEFK	(D)	Cucurbita pepo subsp. pepo	Cucurbita pepo subsp. pepo|Cucurbita maxima|Cucurbita moschata	XP_023527143.1	XP_023527143.1|XP_022979465.1|XP_022979464.1|XP_022956153.1|BAA34056.1	17	2.1	408.19	vicilin-like
4	4	1114.82	0.0395	8.9	8470000	23.5	18.27	95.1	39.05	14	LVQPVNNPGEFKDYLSAGGEAQAYYSVFSNDVLEAALNIPR	2	7	25.84	25.84	1486.08	4456.21	0.0259	(K)	LVQPVNNPGEFKDYLSAGGEAQAYYSVFSNDVLEAALNIPR	(D)	Cucurbita pepo subsp. pepo	Cucurbita pepo subsp. pepo|Cucurbita moschata	XP_023527143.1	XP_023527143.1|XP_022956153.1	18	2.1	408.19	vicilin-like
1	3	707.362	0.0175	8.2	619000	7.32	7.94	55.9	19.87	9	NFLAGRENIMNELDREAK	1	1	7.32	7.94	707.362	2120.06	0.0175	(R)	NFLAGRENIMNELDREAK	(E)	Cucurbita pepo subsp. pepo	Cucurbita pepo subsp. pepo|Cucurbita maxima|Cucurbita moschata	XP_023527143.1	XP_023527143.1|XP_022979465.1|XP_022979464.1|XP_022956153.1|BAA34056.1	19	2.1	408.19	vicilin-like
3	2	680.823	0.0132	9.7	4790000	12.62	8.2	73.8	13.72	14	QGGMMVPHFNSR	2	4	13.53	11.27	680.823	1360.62	0.0134	(K)	QGGMMVPHFNSR	(A)	Cucurbita pepo subsp. pepo	Cucurbita pepo subsp. pepo|Cucurbita maxima|Cucurbita moschata	XP_023527143.1	XP_023527143.1|XP_022979465.1|XP_022979464.1|XP_022956153.1|BAA34056.1	20	2.1	408.19	vicilin-like
2	3	739.677	0.0193	8.7	1880000	15.66	13.26	76.9	10	9	RTEQEQSNNPYYFQEQR	2	5	15.92	14.27	739.677	2217	0.0217	(R)	RTEQEQSNNPYYFQEQR	(F)	Cucurbita pepo subsp. pepo	Cucurbita pepo subsp. pepo|Cucurbita maxima	XP_023527143.1	XP_023527143.1|XP_022979465.1|XP_022979464.1|BAA34056.1	21	2.1	408.19	vicilin-like
5	2	1030.96	0.0094	4.6	6230000	19.65	19.65	84.9	11.92	11	TEQEQSNNPYYFQEQR	2	9	23.07	23.07	1030.96	2060.89	0.0124	(R)	TEQEQSNNPYYFQEQR	(F)	Cucurbita pepo subsp. pepo	Cucurbita pepo subsp. pepo|Cucurbita maxima	XP_023527143.1	XP_023527143.1|XP_022979465.1|XP_022979464.1|BAA34056.1	22	2.1	408.19	vicilin-like
3	3	1034.79	0.0309	10	25400000	25.45	23.04	90.7	27.83	12	AEAEAGFTEVWDQDNDEFQCAGVNMIR	1	3	25.45	23.04	1034.79	3102.32	0.0309	(R)	AEAEAGFTEVWDQDNDEFQCAGVNMIR	(H)	Cucurbita moschata	Cucurbita pepo subsp. pepo|Cucurbita maxima|Cucurbita moschata|UNREADABLE	XP_022964523.1	XP_023515280.1|XP_023000493.1|XP_022964523.1|pdb|2E9Q|A	1	3.1	407.15	11S globulin subunit beta
2	2	713.866	0.0128	8.9	3460000	8.86	6.14	59	22.35	10	ASDRGFEWIAFK	1	2	8.86	6.14	713.866	1426.71	0.0128	(R)	ASDRGFEWIAFK	(T)	Cucurbita moschata	UNREADABLE|Cucurbita pepo subsp. pepo|Cucurbita maxima|Cucurbita moschata	XP_022964523.1	sp|P13744.1|11SB_CUCMA|XP_023515280.1|XP_023000493.1|XP_022964523.1|AAA33110.1	2	3.1	407.15	11S globulin subunit beta
3	2	1022.02	0.0136	6.6	40300000	14.89	10.84	84.8	27.13	9	EGDLLVVPAGVSHWMYNR	2	4	15.36	11.46	1022.02	2043.01	0.0153	(R)	EGDLLVVPAGVSHWMYNR	(G)	Cucurbita moschata	UNREADABLE|Cucurbita pepo subsp. pepo|Cucurbita maxima|Cucurbita moschata	XP_022964523.1	sp|P13744.1|11SB_CUCMA|XP_023515280.1|XP_023000493.1|XP_022964523.1|AAA33110.1	3	3.1	407.15	11S globulin subunit beta
1	2	732.89	0.0132	9	12200000	10.94	9.8	70.4	12.28	13	FYLAGRPEQVER	1	1	10.94	9.8	732.89	1464.76	0.0132	(K)	FYLAGRPEQVER	(G)	Cucurbita moschata	Cucurbita maxima|Cucurbita moschata|UNREADABLE|Cucurbita pepo	XP_022964523.1	XP_023000493.1|XP_022964523.1|pdb|2E9Q|A|AAA33110.1	4	3.1	407.15	11S globulin subunit beta
1	2	882.939	0.0123	7	1340000	20.61	16.14	93.4	19.52	10	GIAIPGCAETYQTDLR	2	2	20.61	16.14	882.939	1764.86	0.0123	(R)	GIAIPGCAETYQTDLR	(R)	Cucurbita moschata	Cucurbita pepo subsp. pepo|Cucurbita maxima|Cucurbita moschata|UNREADABLE	XP_022964523.1	sp|P13744.1|11SB_CUCMA|XP_023515280.1|XP_023000493.1|XP_022964523.1|AAA33110.1	5	3.1	407.15	11S globulin subunit beta
4	2	960.991	0.0156	8.1	20000000	10.91	7.66	67.7	17	18	GIAIPGCAETYQTDLRR	1	4	10.91	7.66	960.991	1920.96	0.0156	(R)	GIAIPGCAETYQTDLRR	(S)	Cucurbita moschata	UNREADABLE|Cucurbita pepo subsp. pepo|Cucurbita maxima|Cucurbita moschata	XP_022964523.1	sp|P13744.1|11SB_CUCMA|XP_023515280.1|XP_023000493.1|XP_022964523.1|AAA33110.1	6	3.1	407.15	11S globulin subunit beta
2	2	767.424	0.0128	8.3	13600000	21.53	21.53	97.2	30.65	19	GQSDLVLIVFADTR	1	2	21.53	21.53	767.424	1533.83	0.0128	(R)	GQSDLVLIVFADTR	(N)	Cucurbita moschata	UNREADABLE|Cucurbita pepo subsp. pepo|Cucurbita maxima|Cucurbita moschata	XP_022964523.1	sp|P13744.1|11SB_CUCMA|XP_023515280.1|XP_023000493.1|XP_022964523.1|AAA33110.1	7	3.1	407.15	11S globulin subunit beta
3	3	923.456	0.0248	9	18200000	18.13	18.13	76.3	19.02	13	GVLYSNAMVAPHYTVNSHSVMYATR	2	7	18.13	18.13	923.456	2768.33	0.0248	(R)	GVLYSNAMVAPHYTVNSHSVMYATR	(G)	Cucurbita moschata	UNREADABLE|Cucurbita pepo subsp. pepo|Cucurbita maxima|Cucurbita moschata	XP_022964523.1	sp|P13744.1|11SB_CUCMA|XP_023515280.1|XP_023000493.1|XP_022964523.1|AAA33110.1	8	3.1	407.15	11S globulin subunit beta
8	2	742.921	0.0135	9.1	201000000	18.13	17.22	81.4	16.55	16	ISTANYHTLPVLR	2	17	21.49	20.47	742.921	1484.82	0.0128	(R)	ISTANYHTLPVLR	(Q)	Cucurbita moschata	Cucurbita pepo subsp. pepo|Cucurbita moschata	XP_022964523.1	XP_023515280.1|XP_022964523.1	9	3.1	407.15	11S globulin subunit beta
8	3	811.075	0.022	9	104000000	21.02	15.74	86.8	25.13	31	IVQVDEDFEVLLPEKDEEER	2	14	21.02	15.74	811.075	2431.19	0.022	(R)	IVQVDEDFEVLLPEKDEEER	(S)	Cucurbita moschata	Cucurbita pepo subsp. pepo|Cucurbita maxima|Cucurbita moschata|UNREADABLE	XP_022964523.1	sp|P13744.1|11SB_CUCMA|XP_023515280.1|XP_023000493.1|XP_022964523.1|AAA33110.1	10	3.1	407.15	11S globulin subunit beta
1	2	796.937	0.0122	7.7	1910000	7.37	7.37	48	10.2	12	KFYLAGRPEQVER	1	1	7.37	7.37	796.937	1592.85	0.0122	(R)	KFYLAGRPEQVER	(G)	Cucurbita moschata	UNREADABLE|Cucurbita pepo subsp. pepo|Cucurbita maxima|Cucurbita moschata	XP_022964523.1	sp|P13744.1|11SB_CUCMA|XP_023515280.1|XP_023000493.1|XP_022964523.1	11	3.1	407.15	11S globulin subunit beta
2	2	616.802	0.0096	7.8	4170000	12.58	9.57	80.3	1.53	7	LKGEDDERDR	1	2	12.58	9.57	616.802	1232.59	0.0096	(K)	LKGEDDERDR	(I)	Cucurbita moschata	UNREADABLE|Cucurbita pepo subsp. pepo|Cucurbita maxima|Cucurbita moschata	XP_022964523.1	sp|P13744.1|11SB_CUCMA|XP_023515280.1|XP_023548082.1|XP_023006382.1|XP_023000493.1|XP_022964523.1	12	3.1	407.15	11S globulin subunit beta
1	2	576.801	0.0107	9.3	10400000	15.88	9.39	82.5	5.17	8	LKYGQQEMR	1	1	15.88	9.39	576.801	1152.58	0.0107	(R)	LKYGQQEMR	(V)	Cucurbita moschata	Cucurbita moschata|UNREADABLE|Cucurbita pepo	XP_022964523.1	XP_022964523.1|XP_022959468.1|pdb|2E9Q|A|AAA33110.1	13	3.1	407.15	11S globulin subunit beta
1	2	603.859	0.0111	9.2	7380000	20.01	15.61	94.2	25.2	13	LVFVAQGFGIR	1	1	20.01	15.61	603.859	1206.7	0.0111	(K)	LVFVAQGFGIR	(G)	Cucurbita moschata	Cucurbita pepo subsp. pepo|Cucurbita moschata	XP_022964523.1	XP_023515280.1|XP_022964523.1	14	3.1	407.15	11S globulin subunit beta
1	2	697.376	0.0116	8.4	14500000	20.61	14.61	97.5	29.23	13	MLPLGVLSNMYR	1	1	20.61	14.61	697.376	1393.73	0.0116	(R)	MLPLGVLSNMYR	(I)	Cucurbita moschata	UNREADABLE|Cucurbita pepo subsp. pepo|Cucurbita maxima|Cucurbita moschata	XP_022964523.1	sp|P13744.1|11SB_CUCMA|XP_023515280.1|XP_023548082.1|XP_023000493.1|XP_022964523.1|XP_022959468.1	15	3.1	407.15	11S globulin subunit beta
4	2	715.897	0.0121	8.5	10800000	14.79	13.08	78.4	14.28	11	NVANQIDPYLRK	2	5	18.59	16.35	715.897	1430.78	0.0122	(R)	NVANQIDPYLRK	(F)	Cucurbita moschata	UNREADABLE|Cucurbita pepo subsp. pepo|Cucurbita maxima|Cucurbita moschata	XP_022964523.1	sp|P13744.1|11SB_CUCMA|XP_023515280.1|XP_023548082.1|XP_023006382.1|XP_023000493.1|XP_022964523.1|XP_022959468.1|AAA33110.1	16	3.1	407.15	11S globulin subunit beta
2	3	1086.82	0.0281	8.6	12600000	21.45	21.45	94.5	25.68	12	RAEAEAGFTEVWDQDNDEFQCAGVNMIR	1	2	21.45	21.45	1086.82	3258.42	0.0281	(R)	RAEAEAGFTEVWDQDNDEFQCAGVNMIR	(H)	Cucurbita moschata	Cucurbita pepo subsp. pepo|Cucurbita maxima|Cucurbita moschata	XP_022964523.1	XP_023515280.1|XP_023000493.1|XP_022964523.1	17	3.1	407.15	11S globulin subunit beta
3	3	906.781	0.0236	8.7	24700000	23.24	14.52	96.1	44.53	11	SGNLFSGFADEFLEEAFQIDGGLVR	2	8	24.51	18.56	1359.66	2718.3	0.0124	(K)	SGNLFSGFADEFLEEAFQIDGGLVR	(K)	Cucurbita moschata	UNREADABLE|Cucurbita maxima|Cucurbita pepo|Cucurbita pepo subsp. pepo|Cucurbita moschata	XP_022964523.1	sp|P13744.1|11SB_CUCMA|XP_023000493.1|AAA33110.1|XP_023515280.1|XP_022964523.1	18	3.1	407.15	11S globulin subunit beta
1	3	949.479	0.0218	7.7	3360000	20.28	17.25	89.5	41.97	12	SGNLFSGFADEFLEEAFQIDGGLVRK	1	1	20.28	17.25	949.479	2846.4	0.0218	(K)	SGNLFSGFADEFLEEAFQIDGGLVRK	(L)	Cucurbita moschata	Cucurbita pepo subsp. pepo|Cucurbita moschata	XP_022964523.1	XP_023515280.1|XP_022964523.1	19	3.1	407.15	11S globulin subunit beta
1	2	773.877	0.0109	7.1	504000	6.8	5.15	58.5	2.5	6	SQSAGSAFRDQHQK	1	1	6.8	5.15	773.877	1546.74	0.0109	(R)	SQSAGSAFRDQHQK	(I)	Cucurbita moschata	Cucurbita pepo subsp. pepo|Cucurbita maxima|Cucurbita moschata	XP_022964523.1	XP_023515280.1|XP_023548082.1|XP_023006382.1|XP_022964523.1|XP_022959468.1	20	3.1	407.15	11S globulin subunit beta
1	2	686.868	0.0106	7.7	49900000	16.51	16.51	81.3	22.03	14	TNDNAITNLLAGR	1	1	16.51	16.51	686.868	1372.72	0.0106	(K)	TNDNAITNLLAGR	(V)	Cucurbita moschata	UNREADABLE|Cucurbita pepo subsp. pepo|Cucurbita maxima|Cucurbita moschata	XP_022964523.1	sp|P13744.1|11SB_CUCMA|XP_023515280.1|XP_023548082.1|XP_023006382.1|XP_023000493.1|XP_022964523.1|XP_022959468.1	21	3.1	407.15	11S globulin subunit beta
1	2	947.975	0.0127	6.7	13600000	25.17	21.6	95.6	23.08	10	VQVVDNFGQSVFDGEVR	2	2	26.53	20.61	947.976	1894.93	0.0148	(R)	VQVVDNFGQSVFDGEVR	(E)	Cucurbita moschata	UNREADABLE|Cucurbita maxima|Cucurbita moschata|Cucurbita pepo	XP_022964523.1	sp|P13744.1|11SB_CUCMA|XP_023000493.1|XP_022964523.1|AAA33110.1	22	3.1	407.15	11S globulin subunit beta
1	4	891.473	0.034	9.5	22100000	7.12	2.41	46.2	35.85	14	VQVVDNFGQSVFDGEVREGQVLMIPQNFVAIK	1	1	7.12	2.41	891.473	3562.84	0.034	(R)	VQVVDNFGQSVFDGEVREGQVLMIPQNFVAIK	(R)	Cucurbita moschata	Cucurbita moschata	XP_022964523.1	XP_022964523.1	23	3.1	407.15	11S globulin subunit beta
1	4	930.498	0.0329	8.8	12100000	14.61	14.61	74.7	33.23	11	VQVVDNFGQSVFDGEVREGQVLMIPQNFVAIKR	1	1	14.61	14.61	930.498	3718.94	0.0329	(R)	VQVVDNFGQSVFDGEVREGQVLMIPQNFVAIKR	(A)	Cucurbita moschata	Cucurbita moschata	XP_022964523.1	XP_022964523.1	24	3.1	407.15	11S globulin subunit beta
3	3	1034.79	0.0309	10	25400000	25.45	23.04	90.7	27.83	12	AEAEAGFTEVWDQDNDEFQCAGVNMIR	1	3	25.45	23.04	1034.79	3102.32	0.0309	(R)	AEAEAGFTEVWDQDNDEFQCAGVNMIR	(H)	Cucurbita pepo subsp. pepo	Cucurbita pepo subsp. pepo|Cucurbita maxima|Cucurbita moschata|UNREADABLE	XP_023515280.1	XP_023515280.1|XP_023000493.1|XP_022964523.1|pdb|2E9Q|A	1	3.2	403.92	11S globulin subunit beta
2	2	713.866	0.0128	8.9	3460000	8.86	6.14	59	22.35	10	ASDRGFEWIAFK	1	2	8.86	6.14	713.866	1426.71	0.0128	(R)	ASDRGFEWIAFK	(T)	Cucurbita pepo subsp. pepo	UNREADABLE|Cucurbita pepo subsp. pepo|Cucurbita maxima|Cucurbita moschata	XP_023515280.1	sp|P13744.1|11SB_CUCMA|XP_023515280.1|XP_023000493.1|XP_022964523.1|AAA33110.1	2	3.2	403.92	11S globulin subunit beta
3	2	1022.02	0.0136	6.6	40300000	14.89	10.84	84.8	27.13	9	EGDLLVVPAGVSHWMYNR	2	4	15.36	11.46	1022.02	2043.01	0.0153	(R)	EGDLLVVPAGVSHWMYNR	(G)	Cucurbita pepo subsp. pepo	UNREADABLE|Cucurbita pepo subsp. pepo|Cucurbita maxima|Cucurbita moschata	XP_023515280.1	sp|P13744.1|11SB_CUCMA|XP_023515280.1|XP_023000493.1|XP_022964523.1|AAA33110.1	3	3.2	403.92	11S globulin subunit beta
1	2	732.89	0.0132	9	12200000	10.94	9.8	70.4	12.28	13	FYLAGRPEQVER	1	1	10.94	9.8	732.89	1464.76	0.0132	(K)	FYLAGRPEQVER	(G)	Cucurbita pepo subsp. pepo	UNREADABLE|Cucurbita pepo subsp. pepo	XP_023515280.1	sp|P13744.1|11SB_CUCMA|XP_023515280.1	4	3.2	403.92	11S globulin subunit beta
1	2	882.939	0.0123	7	1340000	20.61	16.14	93.4	19.52	10	GIAIPGCAETYQTDLR	2	2	20.61	16.14	882.939	1764.86	0.0123	(R)	GIAIPGCAETYQTDLR powtórzony	(R)	Cucurbita pepo subsp. pepo	Cucurbita pepo subsp. pepo|Cucurbita maxima|Cucurbita moschata|UNREADABLE	XP_023515280.1	sp|P13744.1|11SB_CUCMA|XP_023515280.1|XP_023000493.1|XP_022964523.1|AAA33110.1	5	3.2	403.92	11S globulin subunit beta
4	2	960.991	0.0156	8.1	20000000	10.91	7.66	67.7	17	18	GIAIPGCAETYQTDLRR	1	4	10.91	7.66	960.991	1920.96	0.0156	(R)	GIAIPGCAETYQTDLRR	(S)	Cucurbita pepo subsp. pepo	UNREADABLE|Cucurbita pepo subsp. pepo|Cucurbita maxima|Cucurbita moschata	XP_023515280.1	sp|P13744.1|11SB_CUCMA|XP_023515280.1|XP_023000493.1|XP_022964523.1|AAA33110.1	6	3.2	403.92	11S globulin subunit beta
2	2	767.424	0.0128	8.3	13600000	21.53	21.53	97.2	30.65	19	GQSDLVLIVFADTR	1	2	21.53	21.53	767.424	1533.83	0.0128	(R)	GQSDLVLIVFADTR	(N)	Cucurbita pepo subsp. pepo	UNREADABLE|Cucurbita pepo subsp. pepo|Cucurbita maxima|Cucurbita moschata	XP_023515280.1	sp|P13744.1|11SB_CUCMA|XP_023515280.1|XP_023000493.1|XP_022964523.1|AAA33110.1	7	3.2	403.92	11S globulin subunit beta
3	3	923.456	0.0248	9	18200000	18.13	18.13	76.3	19.02	13	GVLYSNAMVAPHYTVNSHSVMYATR	2	7	18.13	18.13	923.456	2768.33	0.0248	(R)	GVLYSNAMVAPHYTVNSHSVMYATR powt	(G)	Cucurbita pepo subsp. pepo	UNREADABLE|Cucurbita pepo subsp. pepo|Cucurbita maxima|Cucurbita moschata	XP_023515280.1	sp|P13744.1|11SB_CUCMA|XP_023515280.1|XP_023000493.1|XP_022964523.1|AAA33110.1	8	3.2	403.92	11S globulin subunit beta
8	2	742.921	0.0135	9.1	201000000	18.13	17.22	81.4	16.55	16	ISTANYHTLPVLR	2	17	21.49	20.47	742.921	1484.82	0.0128	(R)	ISTANYHTLPVLR powt	(Q)	Cucurbita pepo subsp. pepo	Cucurbita pepo subsp. pepo|Cucurbita moschata	XP_023515280.1	XP_023515280.1|XP_022964523.1	9	3.2	403.92	11S globulin subunit beta
8	3	811.075	0.022	9	104000000	21.02	15.74	86.8	25.13	31	IVQVDEDFEVLLPEKDEEER	2	14	21.02	15.74	811.075	2431.19	0.022	(R)	IVQVDEDFEVLLPEKDEEER	(S)	Cucurbita pepo subsp. pepo	Cucurbita pepo subsp. pepo|Cucurbita maxima|Cucurbita moschata|UNREADABLE	XP_023515280.1	sp|P13744.1|11SB_CUCMA|XP_023515280.1|XP_023000493.1|XP_022964523.1|AAA33110.1	10	3.2	403.92	11S globulin subunit beta
1	2	796.937	0.0122	7.7	1910000	7.37	7.37	48	10.2	12	KFYLAGRPEQVER	1	1	7.37	7.37	796.937	1592.85	0.0122	(R)	KFYLAGRPEQVER	(G)	Cucurbita pepo subsp. pepo	UNREADABLE|Cucurbita pepo subsp. pepo|Cucurbita maxima|Cucurbita moschata	XP_023515280.1	sp|P13744.1|11SB_CUCMA|XP_023515280.1|XP_023000493.1|XP_022964523.1	11	3.2	403.92	11S globulin subunit beta
2	2	616.802	0.0096	7.8	4170000	12.58	9.57	80.3	1.53	7	LKGEDDERDR	1	2	12.58	9.57	616.802	1232.59	0.0096	(K)	LKGEDDERDR	(I)	Cucurbita pepo subsp. pepo	UNREADABLE|Cucurbita pepo subsp. pepo|Cucurbita maxima|Cucurbita moschata	XP_023515280.1	sp|P13744.1|11SB_CUCMA|XP_023515280.1|XP_023548082.1|XP_023006382.1|XP_023000493.1|XP_022964523.1	12	3.2	403.92	11S globulin subunit beta
1	2	576.801	0.0107	9.3	10400000	15.88	9.39	82.5	5.17	8	LKYGQQEMR	1	1	15.88	9.39	576.801	1152.58	0.0107	(R)	LKYGQQEMR	(V)	Cucurbita pepo subsp. pepo	UNREADABLE|Cucurbita pepo subsp. pepo|Cucurbita maxima	XP_023515280.1	sp|P13744.1|11SB_CUCMA|XP_023515280.1|XP_023548082.1|XP_023006382.1|XP_023000493.1	13	3.2	403.92	11S globulin subunit beta
1	2	603.859	0.0111	9.2	7380000	20.01	15.61	94.2	25.2	13	LVFVAQGFGIR	1	1	20.01	15.61	603.859	1206.7	0.0111	(K)	LVFVAQGFGIR	(G)	Cucurbita pepo subsp. pepo	Cucurbita pepo subsp. pepo|Cucurbita moschata	XP_023515280.1	XP_023515280.1|XP_022964523.1	14	3.2	403.92	11S globulin subunit beta
1	2	697.376	0.0116	8.4	14500000	20.61	14.61	97.5	29.23	13	MLPLGVLSNMYR	1	1	20.61	14.61	697.376	1393.73	0.0116	(R)	MLPLGVLSNMYR	(I)	Cucurbita pepo subsp. pepo	UNREADABLE|Cucurbita pepo subsp. pepo|Cucurbita maxima|Cucurbita moschata	XP_023515280.1	sp|P13744.1|11SB_CUCMA|XP_023515280.1|XP_023548082.1|XP_023000493.1|XP_022964523.1|XP_022959468.1	15	3.2	403.92	11S globulin subunit beta
4	2	715.897	0.0121	8.5	10800000	14.79	13.08	78.4	14.28	11	NVANQIDPYLRK	2	5	18.59	16.35	715.897	1430.78	0.0122	(R)	NVANQIDPYLRK	(F)	Cucurbita pepo subsp. pepo	UNREADABLE|Cucurbita pepo subsp. pepo|Cucurbita maxima|Cucurbita moschata	XP_023515280.1	sp|P13744.1|11SB_CUCMA|XP_023515280.1|XP_023548082.1|XP_023006382.1|XP_023000493.1|XP_022964523.1|XP_022959468.1|AAA33110.1	16	3.2	403.92	11S globulin subunit beta
2	3	1086.82	0.0281	8.6	12600000	21.45	21.45	94.5	25.68	12	RAEAEAGFTEVWDQDNDEFQCAGVNMIR	1	2	21.45	21.45	1086.82	3258.42	0.0281	(R)	RAEAEAGFTEVWDQDNDEFQCAGVNMIR	(H)	Cucurbita pepo subsp. pepo	Cucurbita pepo subsp. pepo|Cucurbita maxima|Cucurbita moschata	XP_023515280.1	XP_023515280.1|XP_023000493.1|XP_022964523.1	17	3.2	403.92	11S globulin subunit beta
3	3	906.781	0.0236	8.7	24700000	23.24	14.52	96.1	44.53	11	SGNLFSGFADEFLEEAFQIDGGLVR	2	8	24.51	18.56	1359.66	2718.3	0.0124	(K)	SGNLFSGFADEFLEEAFQIDGGLVR powt	(K)	Cucurbita pepo subsp. pepo	UNREADABLE|Cucurbita maxima|Cucurbita pepo|Cucurbita pepo subsp. pepo|Cucurbita moschata	XP_023515280.1	sp|P13744.1|11SB_CUCMA|XP_023000493.1|AAA33110.1|XP_023515280.1|XP_022964523.1	18	3.2	403.92	11S globulin subunit beta
1	3	949.479	0.0218	7.7	3360000	20.28	17.25	89.5	41.97	12	SGNLFSGFADEFLEEAFQIDGGLVRK	1	1	20.28	17.25	949.479	2846.4	0.0218	(K)	SGNLFSGFADEFLEEAFQIDGGLVRK	(L)	Cucurbita pepo subsp. pepo	Cucurbita pepo subsp. pepo|Cucurbita moschata	XP_023515280.1	XP_023515280.1|XP_022964523.1	19	3.2	403.92	11S globulin subunit beta
1	2	773.877	0.0109	7.1	504000	6.8	5.15	58.5	2.5	6	SQSAGSAFRDQHQK	1	1	6.8	5.15	773.877	1546.74	0.0109	(R)	SQSAGSAFRDQHQK	(I)	Cucurbita pepo subsp. pepo	Cucurbita pepo subsp. pepo|Cucurbita maxima|Cucurbita moschata	XP_023515280.1	XP_023515280.1|XP_023548082.1|XP_023006382.1|XP_022964523.1|XP_022959468.1	20	3.2	403.92	11S globulin subunit beta
1	2	686.868	0.0106	7.7	49900000	16.51	16.51	81.3	22.03	14	TNDNAITNLLAGR	1	1	16.51	16.51	686.868	1372.72	0.0106	(K)	TNDNAITNLLAGR	(V)	Cucurbita pepo subsp. pepo	UNREADABLE|Cucurbita pepo subsp. pepo|Cucurbita maxima|Cucurbita moschata	XP_023515280.1	sp|P13744.1|11SB_CUCMA|XP_023515280.1|XP_023548082.1|XP_023006382.1|XP_023000493.1|XP_022964523.1|XP_022959468.1	21	3.2	403.92	11S globulin subunit beta
2	3	1188.29	0.0286	8	50200000	17.63	15.72	89	35.87	13	VQVVDNFGQSVFDGEVQEGQVLMIPQNFVVIK	2	5	20.5	15.64	1188.29	3562.82	0.0279	(R)	VQVVDNFGQSVFDGEVQEGQVLMIPQNFVVIK	(R)	Cucurbita pepo subsp. pepo	Cucurbita pepo subsp. pepo	XP_023515280.1	XP_023515280.1	22	3.2	403.92	11S globulin subunit beta
1	3	1240.32	0.0279	7.5	8100000	24.53	26.28	94.9	33.23	12	VQVVDNFGQSVFDGEVQEGQVLMIPQNFVVIKR	2	6	24.53	26.28	1240.32	3718.93	0.0279	(R)	VQVVDNFGQSVFDGEVQEGQVLMIPQNFVVIKR	(A)	Cucurbita pepo subsp. pepo	Cucurbita pepo subsp. pepo	XP_023515280.1	XP_023515280.1	23	3.2	403.92	11S globulin subunit beta
3	3	1034.79	0.0309	10	25400000	25.45	23.04	90.7	27.83	12	AEAEAGFTEVWDQDNDEFQCAGVNMIR	1	3	25.45	23.04	1034.79	3102.32	0.0309	(R)	AEAEAGFTEVWDQDNDEFQCAGVNMIR	(H)	Cucurbita maxima	Cucurbita pepo subsp. pepo|Cucurbita maxima|Cucurbita moschata|UNREADABLE	XP_023000493.1	XP_023515280.1|XP_023000493.1|XP_022964523.1|pdb|2E9Q|A	1	3.3	370.34	11S globulin subunit beta
2	2	713.866	0.0128	8.9	3460000	8.86	6.14	59	22.35	10	ASDRGFEWIAFK	1	2	8.86	6.14	713.866	1426.71	0.0128	(R)	ASDRGFEWIAFK	(T)	Cucurbita maxima	UNREADABLE|Cucurbita pepo subsp. pepo|Cucurbita maxima|Cucurbita moschata	XP_023000493.1	sp|P13744.1|11SB_CUCMA|XP_023515280.1|XP_023000493.1|XP_022964523.1|AAA33110.1	2	3.3	370.34	11S globulin subunit beta
3	2	1022.02	0.0136	6.6	40300000	14.89	10.84	84.8	27.13	9	EGDLLVVPAGVSHWMYNR	2	4	15.36	11.46	1022.02	2043.01	0.0153	(R)	EGDLLVVPAGVSHWMYNR	(G)	Cucurbita maxima	UNREADABLE|Cucurbita pepo subsp. pepo|Cucurbita maxima|Cucurbita moschata	XP_023000493.1	sp|P13744.1|11SB_CUCMA|XP_023515280.1|XP_023000493.1|XP_022964523.1|AAA33110.1	3	3.3	370.34	11S globulin subunit beta
1	2	857.988	0.0127	7.4	12100000	14.87	7.46	90.8	29.37	10	EGQVLMIPQNFVVIK	2	2	16.97	10.09	857.99	1714.96	0.0162	(R)	EGQVLMIPQNFVVIK	(R)	Cucurbita maxima	Cucurbita maxima|UNREADABLE|Cucurbita pepo	XP_023000493.1	sp|P13744.1|11SB_CUCMA|XP_023000493.1|AAA33110.1	4	3.3	370.34	11S globulin subunit beta
3	2	936.039	0.0132	7	12300000	16.25	14.06	76.1	25.63	11	EGQVLMIPQNFVVIKR	2	4	16.25	14.06	936.039	1871.06	0.0132	(R)	EGQVLMIPQNFVVIKR	(A)	Cucurbita maxima	UNREADABLE|Cucurbita maxima|Cucurbita pepo	XP_023000493.1	sp|P13744.1|11SB_CUCMA|XP_023000493.1|AAA33110.1	5	3.3	370.34	11S globulin subunit beta
1	2	732.89	0.0132	9	12200000	10.94	9.8	70.4	12.28	13	FYLAGRPEQVER	1	1	10.94	9.8	732.89	1464.76	0.0132	(K)	FYLAGRPEQVER	(G)	Cucurbita maxima	Cucurbita maxima|Cucurbita moschata|UNREADABLE|Cucurbita pepo	XP_023000493.1	XP_023000493.1|XP_022964523.1|pdb|2E9Q|A|AAA33110.1	6	3.3	370.34	11S globulin subunit beta
1	2	882.939	0.0123	7	1340000	20.61	16.14	93.4	19.52	10	GIAIPGCAETYQTDLR	2	2	20.61	16.14	882.939	1764.86	0.0123	(R)	GIAIPGCAETYQTDLR powtórzony	(R)	Cucurbita maxima	Cucurbita pepo subsp. pepo|Cucurbita maxima|Cucurbita moschata|UNREADABLE	XP_023000493.1	sp|P13744.1|11SB_CUCMA|XP_023515280.1|XP_023000493.1|XP_022964523.1|AAA33110.1	7	3.3	370.34	11S globulin subunit beta
4	2	960.991	0.0156	8.1	20000000	10.91	7.66	67.7	17	18	GIAIPGCAETYQTDLRR	1	4	10.91	7.66	960.991	1920.96	0.0156	(R)	GIAIPGCAETYQTDLRR	(S)	Cucurbita maxima	UNREADABLE|Cucurbita pepo subsp. pepo|Cucurbita maxima|Cucurbita moschata	XP_023000493.1	sp|P13744.1|11SB_CUCMA|XP_023515280.1|XP_023000493.1|XP_022964523.1|AAA33110.1	8	3.3	370.34	11S globulin subunit beta
2	2	767.424	0.0128	8.3	13600000	21.53	21.53	97.2	30.65	19	GQSDLVLIVFADTR	1	2	21.53	21.53	767.424	1533.83	0.0128	(R)	GQSDLVLIVFADTR	(N)	Cucurbita maxima	UNREADABLE|Cucurbita pepo subsp. pepo|Cucurbita maxima|Cucurbita moschata	XP_023000493.1	sp|P13744.1|11SB_CUCMA|XP_023515280.1|XP_023000493.1|XP_022964523.1|AAA33110.1	9	3.3	370.34	11S globulin subunit beta
3	3	923.456	0.0248	9	18200000	18.13	18.13	76.3	19.02	13	GVLYSNAMVAPHYTVNSHSVMYATR	2	7	18.13	18.13	923.456	2768.33	0.0248	(R)	GVLYSNAMVAPHYTVNSHSVMYATR powt	(G)	Cucurbita maxima	UNREADABLE|Cucurbita pepo subsp. pepo|Cucurbita maxima|Cucurbita moschata	XP_023000493.1	sp|P13744.1|11SB_CUCMA|XP_023515280.1|XP_023000493.1|XP_022964523.1|AAA33110.1	10	3.3	370.34	11S globulin subunit beta
8	3	811.075	0.022	9	104000000	21.02	15.74	86.8	25.13	31	IVQVDEDFEVLLPEKDEEER	2	14	21.02	15.74	811.075	2431.19	0.022	(R)	IVQVDEDFEVLLPEKDEEER	(S)	Cucurbita maxima	Cucurbita pepo subsp. pepo|Cucurbita maxima|Cucurbita moschata|UNREADABLE	XP_023000493.1	sp|P13744.1|11SB_CUCMA|XP_023515280.1|XP_023000493.1|XP_022964523.1|AAA33110.1	11	3.3	370.34	11S globulin subunit beta
1	2	796.937	0.0122	7.7	1910000	7.37	7.37	48	10.2	12	KFYLAGRPEQVER	1	1	7.37	7.37	796.937	1592.85	0.0122	(R)	KFYLAGRPEQVER	(G)	Cucurbita maxima	UNREADABLE|Cucurbita pepo subsp. pepo|Cucurbita maxima|Cucurbita moschata	XP_023000493.1	sp|P13744.1|11SB_CUCMA|XP_023515280.1|XP_023000493.1|XP_022964523.1	12	3.3	370.34	11S globulin subunit beta
2	2	616.802	0.0096	7.8	4170000	12.58	9.57	80.3	1.53	7	LKGEDDERDR	1	2	12.58	9.57	616.802	1232.59	0.0096	(K)	LKGEDDERDR	(I)	Cucurbita maxima	UNREADABLE|Cucurbita pepo subsp. pepo|Cucurbita maxima|Cucurbita moschata	XP_023000493.1	sp|P13744.1|11SB_CUCMA|XP_023515280.1|XP_023548082.1|XP_023006382.1|XP_023000493.1|XP_022964523.1	13	3.3	370.34	11S globulin subunit beta
1	2	576.801	0.0107	9.3	10400000	15.88	9.39	82.5	5.17	8	LKYGQQEMR	1	1	15.88	9.39	576.801	1152.58	0.0107	(R)	LKYGQQEMR	(V)	Cucurbita maxima	UNREADABLE|Cucurbita pepo subsp. pepo|Cucurbita maxima	XP_023000493.1	sp|P13744.1|11SB_CUCMA|XP_023515280.1|XP_023548082.1|XP_023006382.1|XP_023000493.1	14	3.3	370.34	11S globulin subunit beta
1	2	697.376	0.0116	8.4	14500000	20.61	14.61	97.5	29.23	13	MLPLGVLSNMYR	1	1	20.61	14.61	697.376	1393.73	0.0116	(R)	MLPLGVLSNMYR	(I)	Cucurbita maxima	UNREADABLE|Cucurbita pepo subsp. pepo|Cucurbita maxima|Cucurbita moschata	XP_023000493.1	sp|P13744.1|11SB_CUCMA|XP_023515280.1|XP_023548082.1|XP_023000493.1|XP_022964523.1|XP_022959468.1	15	3.3	370.34	11S globulin subunit beta
4	2	715.897	0.0121	8.5	10800000	14.79	13.08	78.4	14.28	11	NVANQIDPYLRK	2	5	18.59	16.35	715.897	1430.78	0.0122	(R)	NVANQIDPYLRK	(F)	Cucurbita maxima	UNREADABLE|Cucurbita pepo subsp. pepo|Cucurbita maxima|Cucurbita moschata	XP_023000493.1	sp|P13744.1|11SB_CUCMA|XP_023515280.1|XP_023548082.1|XP_023006382.1|XP_023000493.1|XP_022964523.1|XP_022959468.1|AAA33110.1	16	3.3	370.34	11S globulin subunit beta
2	3	1086.82	0.0281	8.6	12600000	21.45	21.45	94.5	25.68	12	RAEAEAGFTEVWDQDNDEFQCAGVNMIR	1	2	21.45	21.45	1086.82	3258.42	0.0281	(R)	RAEAEAGFTEVWDQDNDEFQCAGVNMIR	(H)	Cucurbita maxima	Cucurbita pepo subsp. pepo|Cucurbita maxima|Cucurbita moschata	XP_023000493.1	XP_023515280.1|XP_023000493.1|XP_022964523.1	17	3.3	370.34	11S globulin subunit beta
3	3	906.781	0.0236	8.7	24700000	23.24	14.52	96.1	44.53	11	SGNIFSGFADEFLEEAFQIDGGLVR	2	8	24.51	18.56	1359.66	2718.3	0.0124	(K)	SGNIFSGFADEFLEEAFQIDGGLVR powtórzony	(K)	Cucurbita maxima	UNREADABLE|Cucurbita maxima|Cucurbita pepo|Cucurbita pepo subsp. pepo|Cucurbita moschata	XP_023000493.1	sp|P13744.1|11SB_CUCMA|XP_023000493.1|AAA33110.1|XP_023515280.1|XP_022964523.1	18	3.3	370.34	11S globulin subunit beta
1	3	949.479	0.0218	7.7	3360000	20.28	17.25	89.5	41.97	12	SGNIFSGFADEFLEEAFQIDGGLVRK	1	1	20.28	17.25	949.479	2846.4	0.0218	(K)	SGNIFSGFADEFLEEAFQIDGGLVRK	(L)	Cucurbita maxima	UNREADABLE|Cucurbita maxima|Cucurbita pepo	XP_023000493.1	sp|P13744.1|11SB_CUCMA|XP_023000493.1|AAA33110.1	19	3.3	370.34	11S globulin subunit beta
1	2	686.868	0.0106	7.7	49900000	16.51	16.51	81.3	22.03	14	TNDNAITNLLAGR	1	1	16.51	16.51	686.868	1372.72	0.0106	(K)	TNDNAITNLLAGR	(V)	Cucurbita maxima	UNREADABLE|Cucurbita pepo subsp. pepo|Cucurbita maxima|Cucurbita moschata	XP_023000493.1	sp|P13744.1|11SB_CUCMA|XP_023515280.1|XP_023548082.1|XP_023006382.1|XP_023000493.1|XP_022964523.1|XP_022959468.1	20	3.3	370.34	11S globulin subunit beta
1	2	947.975	0.0127	6.7	13600000	25.17	21.6	95.6	23.08	10	VQVVDNFGQSVFDGEVR	2	2	26.53	20.61	947.976	1894.93	0.0148	(R)	VQVVDNFGQSVFDGEVR powtórzony	(E)	Cucurbita maxima	UNREADABLE|Cucurbita maxima|Cucurbita moschata|Cucurbita pepo	XP_023000493.1	sp|P13744.1|11SB_CUCMA|XP_023000493.1|XP_022964523.1|AAA33110.1	21	3.3	370.34	11S globulin subunit beta
5	3	1026.46	0.0281	9.1	12400000	24.8	23.01	94.5	29.58	11	AEAEAGSTEVWDQYSEEFQCAGVNMLR	1	5	24.8	23.01	1026.46	3077.33	0.0281	(R)	AEAEAGSTEVWDQYSEEFQCAGVNMLR	(H)	Cucurbita pepo subsp. pepo	Cucurbita pepo subsp. pepo|Cucurbita maxima|Cucurbita moschata	XP_023548082.1	XP_023548082.1|XP_023006382.1|XP_022959468.1	1	3.4	366.86	11S globulin subunit beta-like
3	3	675.697	0.0202	10	20800000	18.19	14.78	94.3	28.37	11	EGDLLVVPAGVSHWIYNR	2	4	19.5	13.81	1013.04	2025.06	0.015	(R)	EGDLLVVPAGVSHWIYNR	(G)	Cucurbita pepo subsp. pepo	Cucurbita pepo subsp. pepo|Cucurbita maxima|Cucurbita moschata	XP_023548082.1	XP_023548082.1|XP_023006382.1|XP_022959468.1	2	3.4	366.86	11S globulin subunit beta-like
1	2	789.435	0.0095	6.1	2980000	17.09	13.08	94.4	32.03	18	GQSDLILIVFTDTR	1	1	17.09	13.08	789.435	1577.85	0.0095	(R)	GQSDLILIVFTDTR	(N)	Cucurbita pepo subsp. pepo	Cucurbita pepo subsp. pepo|Cucurbita maxima|Cucurbita moschata	XP_023548082.1	XP_023548082.1|XP_023006382.1|XP_022959468.1	3	3.4	366.86	11S globulin subunit beta-like
1	2	802.445	0.0125	7.8	6290000	16.13	12.51	91.1	28.15	10	GQVLMIPQNFVVMK	2	3	18.58	13.56	535.3	1603.87	0.0146	(K)	GQVLMIPQNFVVMK	(Q)	Cucurbita pepo subsp. pepo	Cucurbita pepo subsp. pepo|Cucurbita moschata	XP_023548082.1	XP_023548082.1|XP_022959468.1	4	3.4	366.86	11S globulin subunit beta-like
1	2	875.932	0.0141	8	1910000	14.02	13.02	85.4	17.78	10	GVAIPGCAETYQTDLR	2	2	15.64	14.68	875.932	1750.84	0.0136	(R)	GVAIPGCAETYQTDLR	(R)	Cucurbita pepo subsp. pepo	Cucurbita pepo subsp. pepo|Cucurbita moschata|Cucurbita maxima	XP_023548082.1	XP_023548082.1|XP_022959468.1|XP_023006382.1	5	3.4	366.86	11S globulin subunit beta-like
1	2	1373.73	0.0138	5	3480000	6.69	6.69	57.1	21.32	11	GVLYSNALVAPHYTVNSHTVLYATR	1	1	6.69	6.69	1373.73	2746.43	0.0138	(R)	GVLYSNALVAPHYTVNSHTVLYATR	(G)	Cucurbita pepo subsp. pepo	Cucurbita pepo subsp. pepo|Cucurbita moschata	XP_023548082.1	XP_023548082.1|XP_022959468.1	6	3.4	366.86	11S globulin subunit beta-like
4	2	773.419	0.0142	9.2	21000000	14.49	15.05	65.4	20.23	12	ISTANYHNLPFLR	2	9	19.16	13.31	773.419	1545.82	0.0142	(R)	ISTANYHNLPFLR	(Q)	Cucurbita pepo subsp. pepo	Cucurbita pepo subsp. pepo|Cucurbita maxima|Cucurbita moschata	XP_023548082.1	XP_023548082.1|XP_023006382.1|XP_022959468.1	7	3.4	366.86	11S globulin subunit beta-like
1	2	893.972	0.0145	8.1	336000	16.27	10.79	89.8	27.32	5	IVQVDEDFDVLLPER	1	1	16.27	10.79	893.972	1786.92	0.0145	(R)	IVQVDEDFDVLLPER	(D)	Cucurbita pepo subsp. pepo	Cucurbita pepo subsp. pepo|Cucurbita maxima	XP_023548082.1	XP_023548082.1|XP_023006382.1	8	3.4	366.86	11S globulin subunit beta-like
5	3	815.41	0.0219	9	18300000	24.77	17.25	97.3	24.52	13	IVQVDEDFDVLLPERDEQER	2	10	24.84	15.85	815.411	2444.19	0.0235	(R)	IVQVDEDFDVLLPERDEQER	(S)	Cucurbita pepo subsp. pepo	Cucurbita pepo subsp. pepo|Cucurbita maxima	XP_023548082.1	XP_023548082.1|XP_023006382.1	9	3.4	366.86	11S globulin subunit beta-like
4	2	866.492	0.0122	7.1	24700000	14.25	11.31	75	24.55	11	KGQVLMIPQNFVVMK	2	7	14.79	11.3	866.493	1731.96	0.0133	(R)	KGQVLMIPQNFVVMK	(Q)	Cucurbita pepo subsp. pepo	Cucurbita pepo subsp. pepo|Cucurbita moschata	XP_023548082.1	XP_023548082.1|XP_022959468.1	10	3.4	366.86	11S globulin subunit beta-like
2	2	616.802	0.0096	7.8	4170000	12.58	9.57	80.3	1.53	7	LKGEDDERDR	1	2	12.58	9.57	616.802	1232.59	0.0096	(R)	LKGEDDERDR	(I)	Cucurbita pepo subsp. pepo	UNREADABLE|Cucurbita pepo subsp. pepo|Cucurbita maxima|Cucurbita moschata	XP_023548082.1	sp|P13744.1|11SB_CUCMA|XP_023515280.1|XP_023548082.1|XP_023006382.1|XP_023000493.1|XP_022964523.1	11	3.4	366.86	11S globulin subunit beta-like
1	2	576.801	0.0107	9.3	10400000	15.88	9.39	82.5	5.17	8	LKYGQQEMR	1	1	15.88	9.39	576.801	1152.58	0.0107	(R)	LKYGQQEMR	(I)	Cucurbita pepo subsp. pepo	UNREADABLE|Cucurbita pepo subsp. pepo|Cucurbita maxima	XP_023548082.1	sp|P13744.1|11SB_CUCMA|XP_023515280.1|XP_023548082.1|XP_023006382.1|XP_023000493.1	12	3.4	366.86	11S globulin subunit beta-like
1	2	697.376	0.0116	8.4	14500000	20.61	14.61	97.5	29.23	13	MLPLGVLSNMYR	1	1	20.61	14.61	697.376	1393.73	0.0116	(R)	MLPLGVLSNMYR	(I)	Cucurbita pepo subsp. pepo	UNREADABLE|Cucurbita pepo subsp. pepo|Cucurbita maxima|Cucurbita moschata	XP_023548082.1	sp|P13744.1|11SB_CUCMA|XP_023515280.1|XP_023548082.1|XP_023000493.1|XP_022964523.1|XP_022959468.1	13	3.4	366.86	11S globulin subunit beta-like
4	2	715.897	0.0121	8.5	10800000	14.79	13.08	78.4	14.28	11	NVANQIDPYLRK	2	5	18.59	16.35	715.897	1430.78	0.0122	(R)	NVANQIDPYLRK powtórzony	(F)	Cucurbita pepo subsp. pepo	UNREADABLE|Cucurbita pepo subsp. pepo|Cucurbita maxima|Cucurbita moschata	XP_023548082.1	sp|P13744.1|11SB_CUCMA|XP_023515280.1|XP_023548082.1|XP_023006382.1|XP_023000493.1|XP_022964523.1|XP_022959468.1|AAA33110.1	14	3.4	366.86	11S globulin subunit beta-like
2	2	763.891	0.0116	7.6	1390000	10.79	11.38	66.6	22.13	10	QASDKGFEWIAFK	1	2	10.79	11.38	763.891	1526.76	0.0116	(K)	QASDKGFEWIAFK	(T)	Cucurbita pepo subsp. pepo	Cucurbita pepo subsp. pepo|Cucurbita maxima|Cucurbita moschata	XP_023548082.1	XP_023548082.1|XP_023006382.1|XP_022959468.1	15	3.4	366.86	11S globulin subunit beta-like
2	3	1078.49	0.0231	7.2	2290000	23.85	23.85	86.3	27.42	13	RAEAEAGSTEVWDQYSEEFQCAGVNMLR	1	2	23.85	23.85	1078.49	3233.43	0.0231	(R)	RAEAEAGSTEVWDQYSEEFQCAGVNMLR	(H)	Cucurbita pepo subsp. pepo	Cucurbita pepo subsp. pepo|Cucurbita maxima|Cucurbita moschata	XP_023548082.1	XP_023548082.1|XP_023006382.1|XP_022959468.1	16	3.4	366.86	11S globulin subunit beta-like
3	2	979.472	0.015	7.6	18300000	24.09	26.94	94	39.6	11	SGNMFSGIADELLEEAFK	2	4	24.09	26.94	979.472	1957.92	0.015	(K)	SGNMFSGIADELLEEAFK	(V)	Cucurbita pepo subsp. pepo	Cucurbita pepo subsp. pepo	XP_023548082.1	XP_023548082.1	17	3.4	366.86	11S globulin subunit beta-like
1	3	895.454	0.025	9.3	4300000	17.36	17.17	86.9	42.48	11	SGNMFSGIADELLEEAFKVDSGLVR	1	1	17.36	17.17	895.454	2684.32	0.025	(K)	SGNMFSGIADELLEEAFKVDSGLVR	(R)	Cucurbita pepo subsp. pepo	Cucurbita pepo subsp. pepo	XP_023548082.1	XP_023548082.1	18	3.4	366.86	11S globulin subunit beta-like
1	2	773.877	0.0109	7.1	504000	6.8	5.15	58.5	2.5	6	SQSAGSAFRDQHQK	1	1	6.8	5.15	773.877	1546.74	0.0109	(R)	SQSAGSAFRDQHQK	(I)	Cucurbita pepo subsp. pepo	Cucurbita pepo subsp. pepo|Cucurbita maxima|Cucurbita moschata	XP_023548082.1	XP_023515280.1|XP_023548082.1|XP_023006382.1|XP_022964523.1|XP_022959468.1	19	3.4	366.86	11S globulin subunit beta-like
1	2	686.868	0.0106	7.7	49900000	16.51	16.51	81.3	22.03	14	TNDNAITNLLAGR	1	1	16.51	16.51	686.868	1372.72	0.0106	(K)	TNDNAITNLLAGR	(A)	Cucurbita pepo subsp. pepo	UNREADABLE|Cucurbita pepo subsp. pepo|Cucurbita maxima|Cucurbita moschata	XP_023548082.1	sp|P13744.1|11SB_CUCMA|XP_023515280.1|XP_023548082.1|XP_023006382.1|XP_023000493.1|XP_022964523.1|XP_022959468.1	20	3.4	366.86	11S globulin subunit beta-like
2	2	930.49	0.0112	6	1490000	22.44	18.57	87.6	21.83	10	VQVVNDLGQSVFNGEVR	2	5	22.44	18.57	930.49	1859.96	0.0112	(R)	VQVVNDLGQSVFNGEVR	(K)	Cucurbita pepo subsp. pepo	Cucurbita pepo subsp. pepo	XP_023548082.1	XP_023548082.1	21	3.4	366.86	11S globulin subunit beta-like
5	3	1026.46	0.0281	9.1	12400000	24.8	23.01	94.5	29.58	11	AEAEAGSTEVWDQYSEEFQCAGVNMLR	1	5	24.8	23.01	1026.46	3077.33	0.0281	(R)	AEAEAGSTEVWDQYSEEFQCAGVNMLR	(H)	Cucurbita moschata	Cucurbita pepo subsp. pepo|Cucurbita maxima|Cucurbita moschata	XP_022959468.1	XP_023548082.1|XP_023006382.1|XP_022959468.1	1	3.5	289.86	11S globulin subunit beta-like
3	3	675.697	0.0202	10	20800000	18.19	14.78	94.3	28.37	11	EGDLLVVPAGVSHWIYNR	2	4	19.5	13.81	1013.04	2025.06	0.015	(R)	EGDLLVVPAGVSHWIYNR powtórzony	(G)	Cucurbita moschata	Cucurbita pepo subsp. pepo|Cucurbita maxima|Cucurbita moschata	XP_022959468.1	XP_023548082.1|XP_023006382.1|XP_022959468.1	2	3.5	289.86	11S globulin subunit beta-like
1	2	789.435	0.0095	6.1	2980000	17.09	13.08	94.4	32.03	18	GQSDLILIVFTDTR	1	1	17.09	13.08	789.435	1577.85	0.0095	(R)	GQSDLILIVFTDTR	(N)	Cucurbita moschata	Cucurbita pepo subsp. pepo|Cucurbita maxima|Cucurbita moschata	XP_022959468.1	XP_023548082.1|XP_023006382.1|XP_022959468.1	3	3.5	289.86	11S globulin subunit beta-like
1	2	802.445	0.0125	7.8	6290000	16.13	12.51	91.1	28.15	10	GQVLMIPQNFVVMK	2	3	18.58	13.56	535.3	1603.87	0.0146	(K)	GQVLMIPQNFVVMK powtórzony	(Q)	Cucurbita moschata	Cucurbita pepo subsp. pepo|Cucurbita moschata	XP_022959468.1	XP_023548082.1|XP_022959468.1	4	3.5	289.86	11S globulin subunit beta-like
1	2	875.932	0.0141	8	1910000	14.02	13.02	85.4	17.78	10	GVAIPGCAETYQTDLR	2	2	15.64	14.68	875.932	1750.84	0.0136	(R)	GVAIPGCAETYQTDLR powtórzony	(R)	Cucurbita moschata	Cucurbita pepo subsp. pepo|Cucurbita moschata|Cucurbita maxima	XP_022959468.1	XP_023548082.1|XP_022959468.1|XP_023006382.1	5	3.5	289.86	11S globulin subunit beta-like
1	2	1373.73	0.0138	5	3480000	6.69	6.69	57.1	21.32	11	GVLYSNALVAPHYTVNSHTVLYATR	1	1	6.69	6.69	1373.73	2746.43	0.0138	(R)	GVLYSNALVAPHYTVNSHTVLYATR	(G)	Cucurbita moschata	Cucurbita pepo subsp. pepo|Cucurbita moschata	XP_022959468.1	XP_023548082.1|XP_022959468.1	6	3.5	289.86	11S globulin subunit beta-like
4	2	773.419	0.0142	9.2	21000000	14.49	15.05	65.4	20.23	12	ISTANYHNLPFLR	2	9	19.16	13.31	773.419	1545.82	0.0142	(R)	ISTANYHNLPFLR powt	(Q)	Cucurbita moschata	Cucurbita pepo subsp. pepo|Cucurbita maxima|Cucurbita moschata	XP_022959468.1	XP_023548082.1|XP_023006382.1|XP_022959468.1	7	3.5	289.86	11S globulin subunit beta-like
4	2	866.492	0.0122	7.1	24700000	14.25	11.31	75	24.55	11	KGQVLMIPQNFVVMK	2	7	14.79	11.3	866.493	1731.96	0.0133	(R)	KGQVLMIPQNFVVMK	(Q)	Cucurbita moschata	Cucurbita pepo subsp. pepo|Cucurbita moschata	XP_022959468.1	XP_023548082.1|XP_022959468.1	8	3.5	289.86	11S globulin subunit beta-like
2	2	616.802	0.0096	7.8	4170000	12.58	9.57	80.3	1.53	7	LKGEDDERDR	1	2	12.58	9.57	616.802	1232.59	0.0096	(R)	LKGEDDERDR	(I)	Cucurbita moschata	Cucurbita pepo subsp. pepo|Cucurbita maxima|Cucurbita moschata|UNREADABLE	XP_022959468.1	XP_023548082.1|XP_023006382.1|XP_023000493.1|XP_022964523.1|XP_022959468.1|pdb|2E9Q|A|AAA33110.1	9	3.5	289.86	11S globulin subunit beta-like
1	2	576.801	0.0107	9.3	10400000	15.88	9.39	82.5	5.17	8	LKYGQQEMR	1	1	15.88	9.39	576.801	1152.58	0.0107	(R)	LKYGQQEMR	(I)	Cucurbita moschata	Cucurbita moschata|UNREADABLE|Cucurbita pepo	XP_022959468.1	XP_022964523.1|XP_022959468.1|pdb|2E9Q|A|AAA33110.1	10	3.5	289.86	11S globulin subunit beta-like
1	2	697.376	0.0116	8.4	14500000	20.61	14.61	97.5	29.23	13	MLPLGVLSNMYR	1	1	20.61	14.61	697.376	1393.73	0.0116	(R)	MLPLGVLSNMYR	(I)	Cucurbita moschata	UNREADABLE|Cucurbita pepo subsp. pepo|Cucurbita maxima|Cucurbita moschata	XP_022959468.1	sp|P13744.1|11SB_CUCMA|XP_023515280.1|XP_023548082.1|XP_023000493.1|XP_022964523.1|XP_022959468.1	11	3.5	289.86	11S globulin subunit beta-like
4	2	715.897	0.0121	8.5	10800000	14.79	13.08	78.4	14.28	11	NVANQIDPYLRK	2	5	18.59	16.35	715.897	1430.78	0.0122	(R)	NVANQIDPYLRK powtórzony	(F)	Cucurbita moschata	UNREADABLE|Cucurbita pepo subsp. pepo|Cucurbita maxima|Cucurbita moschata	XP_022959468.1	sp|P13744.1|11SB_CUCMA|XP_023515280.1|XP_023548082.1|XP_023006382.1|XP_023000493.1|XP_022964523.1|XP_022959468.1|AAA33110.1	12	3.5	289.86	11S globulin subunit beta-like
2	2	763.891	0.0116	7.6	1390000	10.79	11.38	66.6	22.13	10	QASDKGFEWIAFK	1	2	10.79	11.38	763.891	1526.76	0.0116	(K)	QASDKGFEWIAFK	(T)	Cucurbita moschata	Cucurbita pepo subsp. pepo|Cucurbita maxima|Cucurbita moschata	XP_022959468.1	XP_023548082.1|XP_023006382.1|XP_022959468.1	13	3.5	289.86	11S globulin subunit beta-like
2	3	1078.49	0.0231	7.2	2290000	23.85	23.85	86.3	27.42	13	RAEAEAGSTEVWDQYSEEFQCAGVNMLR	1	2	23.85	23.85	1078.49	3233.43	0.0231	(R)	RAEAEAGSTEVWDQYSEEFQCAGVNMLR	(H)	Cucurbita moschata	Cucurbita pepo subsp. pepo|Cucurbita maxima|Cucurbita moschata	XP_022959468.1	XP_023548082.1|XP_023006382.1|XP_022959468.1	14	3.5	289.86	11S globulin subunit beta-like
1	2	773.877	0.0109	7.1	504000	6.8	5.15	58.5	2.5	6	SQSAGSAFRDQHQK	1	1	6.8	5.15	773.877	1546.74	0.0109	(R)	SQSAGSAFRDQHQK	(I)	Cucurbita moschata	Cucurbita pepo subsp. pepo|Cucurbita maxima|Cucurbita moschata	XP_022959468.1	XP_023515280.1|XP_023548082.1|XP_023006382.1|XP_022964523.1|XP_022959468.1	15	3.5	289.86	11S globulin subunit beta-like
1	2	686.868	0.0106	7.7	49900000	16.51	16.51	81.3	22.03	14	TNDNAITNLLAGR	1	1	16.51	16.51	686.868	1372.72	0.0106	(K)	TNDNAITNLLAGR	(A)	Cucurbita moschata	UNREADABLE|Cucurbita pepo subsp. pepo|Cucurbita maxima|Cucurbita moschata	XP_022959468.1	sp|P13744.1|11SB_CUCMA|XP_023515280.1|XP_023548082.1|XP_023006382.1|XP_023000493.1|XP_022964523.1|XP_022959468.1	16	3.5	289.86	11S globulin subunit beta-like
1	2	930.982	0.0125	6.7	6380000	25.43	20.21	95	22.87	8	VQVVDDLGQSVFNGEVR	2	3	28	23.54	930.983	1860.94	0.014	(R)	VQVVDDLGQSVFNGEVR	(K)	Cucurbita moschata	Cucurbita moschata	XP_022959468.1	XP_022959468.1	17	3.5	289.86	11S globulin subunit beta-like
2	2	1235.69	0.0169	6.9	123000000	25.34	25.34	98.2	39.7	22	ALPLQLLEQSFQITTAEAQQLK	2	4	25.34	25.34	1235.69	2470.36	0.0169	(R)	ALPLQLLEQSFQITTAEAQQLK	(Q)	Cucurbita pepo subsp. pepo	Cucurbita pepo subsp. pepo|Cucurbita maxima|Cucurbita moschata	XP_023553732.1	XP_023553732.1|XP_022967670.1|XP_022963932.1	1	4.1	352.1	11S globulin seed storage protein 2-like
2	3	920.055	0.017	6.2	1430000	17.18	17.18	86.5	22.68	9	CDEQMSFLTPEEEEEELSESPSR	2	5	17.44	17.44	920.057	2758.13	0.0218	(K)	CDEQMSFLTPEEEEEELSESPSR	(R)	Cucurbita pepo subsp. pepo	Cucurbita pepo subsp. pepo|Cucurbita maxima|Cucurbita moschata	XP_023553732.1	XP_023553732.1|XP_022967670.1|XP_022963932.1	2	4.1	352.1	11S globulin seed storage protein 2-like
1	3	972.088	0.0153	5.3	814000	18.75	16.16	89.1	20.88	8	CDEQMSFLTPEEEEEELSESPSRR	2	2	18.75	16.16	972.088	2914.24	0.0153	(K)	CDEQMSFLTPEEEEEELSESPSRR	(E)	Cucurbita pepo subsp. pepo	Cucurbita pepo subsp. pepo|Cucurbita maxima|Cucurbita moschata	XP_023553732.1	XP_023553732.1|XP_022967670.1|XP_022963932.1	3	4.1	352.1	11S globulin seed storage protein 2-like
2	2	1162.55	0.0091	3.9	1550000	15.24	12.44	74.8	18.78	13	GHLFPNAQYNLHWSMTDHR	2	7	18.06	15.98	775.371	2324.08	0.0217	(K)	GHLFPNAQYNLHWSMTDHR	(L)	Cucurbita pepo subsp. pepo	Cucurbita pepo subsp. pepo|Cucurbita maxima|Cucurbita moschata	XP_023553732.1	XP_023553732.1|XP_022995608.1|XP_022930973.1|XP_022963932.1	4	4.1	352.1	11S globulin seed storage protein 2-like
4	3	1039.86	0.0245	7.9	90800000	20.43	17.59	92.1	43.25	14	GNMFVIPQFYPALVQAGQEGFEWITFK	2	10	20.43	17.59	1039.86	3117.55	0.0245	(R)	GNMFVIPQFYPALVQAGQEGFEWITFK	(T)	Cucurbita pepo subsp. pepo	Cucurbita pepo subsp. pepo|Cucurbita maxima|Cucurbita moschata	XP_023553732.1	XP_023553732.1|XP_022967670.1|XP_022963932.1	5	4.1	352.1	11S globulin seed storage protein 2-like
4	3	1167.58	0.016	4.6	8870000	20.42	18.54	85.8	33.23	11	GSKNNDLVNIYNGFDQDFLAQAYNVPTDLVR	1	4	20.42	18.54	1167.58	3500.71	0.016	(R)	GSKNNDLVNIYNGFDQDFLAQAYNVPTDLVR	(R)	Cucurbita pepo subsp. pepo	Cucurbita pepo subsp. pepo|Cucurbita moschata	XP_023553732.1	XP_023553732.1|XP_022963932.1	6	4.1	352.1	11S globulin seed storage protein 2-like
2	4	914.966	0.0333	9.1	3340000	16.59	18.86	83.6	31.73	11	GSKNNDLVNIYNGFDQDFLAQAYNVPTDLVRR	1	2	16.59	18.86	914.966	3656.81	0.0333	(R)	GSKNNDLVNIYNGFDQDFLAQAYNVPTDLVRR	(M)	Cucurbita pepo subsp. pepo	Cucurbita pepo subsp. pepo|Cucurbita moschata	XP_023553732.1	XP_023553732.1|XP_022963932.1	7	4.1	352.1	11S globulin seed storage protein 2-like
3	2	1498.19	0.0192	6.4	35400000	26.41	26.41	90.5	36.75	12	IESEGGITELWDEAEEDFQCAGVAAIR	1	3	26.41	26.41	1498.19	2995.36	0.0192	(R)	IESEGGITELWDEAEEDFQCAGVAAIR	(N)	Cucurbita pepo subsp. pepo	Cucurbita pepo subsp. pepo|Cucurbita moschata	XP_023553732.1	XP_023553732.1|XP_022963932.1	8	4.1	352.1	11S globulin seed storage protein 2-like
2	2	663.331	0.011	8.3	3090000	10.32	11.44	69.5	1.25	4	IGAGKEDDQHQK	2	5	10.61	10.61	663.331	1325.64	0.0095	(R)	IGAGKEDDQHQK	(V)	Cucurbita pepo subsp. pepo	Cucurbita pepo subsp. pepo|Cucurbita maxima|Cucurbita moschata	XP_023553732.1	XP_023553732.1|XP_022967670.1|XP_022963932.1	9	4.1	352.1	11S globulin seed storage protein 2-like
4	2	774.51	0.0129	8.3	16400000	15.15	15.15	76.4	30.5	13	INILNQLKLPILR	1	4	15.15	15.15	774.51	1548	0.0129	(R)	INILNQLKLPILR	(F)	Cucurbita pepo subsp. pepo	Cucurbita pepo subsp. pepo|Cucurbita moschata	XP_023553732.1	XP_023553732.1|XP_022963932.1	10	4.1	352.1	11S globulin seed storage protein 2-like
5	3	964.462	0.023	8	27800000	23.04	23.04	97.7	27	27	LVYVVDGEANFQISDDYGNQVFNER	2	8	23.04	23.04	964.462	2891.35	0.023	(R)	LVYVVDGEANFQISDDYGNQVFNER	(V)	Cucurbita pepo subsp. pepo	Cucurbita pepo subsp. pepo|Cucurbita maxima|Cucurbita moschata	XP_023553732.1	XP_023553732.1|XP_022967670.1|XP_022963932.1	11	4.1	352.1	11S globulin seed storage protein 2-like
5	3	1076.87	0.0253	7.8	16500000	21.45	16.18	93.4	36	11	NNDLVNIYNGFDQDFLAQAYNVPTDLVR	2	8	21.45	16.18	1076.87	3228.56	0.0253	(K)	NNDLVNIYNGFDQDFLAQAYNVPTDLVR	(R)	Cucurbita pepo subsp. pepo	Cucurbita pepo subsp. pepo|Cucurbita moschata	XP_023553732.1	XP_023553732.1|XP_022963932.1	12	4.1	352.1	11S globulin seed storage protein 2-like
3	2	861.421	0.0112	6.5	8050000	13.05	10.38	89.5	14.92	56	QHTFLFPPSSGSSSSR	1	3	13.05	10.38	861.421	1721.82	0.0112	(R)	QHTFLFPPSSGSSSSR	(R)	Cucurbita pepo subsp. pepo	Cucurbita pepo subsp. pepo	XP_023553732.1	XP_023553732.1	13	4.1	352.1	11S globulin seed storage protein 2-like
1	4	1142.06	0.0392	8.6	6130000	18.36	16.88	91.8	33.83	11	RGDMIVVPAGTVQWCHNDGGQDLVAVAFLDLNNEDNQLDLR	2	3	18.36	16.88	1142.06	4565.19	0.0392	(R)	RGDMIVVPAGTVQWCHNDGGQDLVAVAFLDLNNEDNQLDLR	(I)	Cucurbita pepo subsp. pepo	Cucurbita pepo subsp. pepo|Cucurbita moschata	XP_023553732.1	XP_023553732.1|XP_022963932.1	14	4.1	352.1	11S globulin seed storage protein 2-like
4	3	1051.17	0.0213	6.8	12400000	26.47	27.53	100	34.32	11	RIESEGGITELWDEAEEDFQCAGVAAIR	2	5	26.47	27.53	1051.17	3151.46	0.0213	(R)	RIESEGGITELWDEAEEDFQCAGVAAIR	(N)	Cucurbita pepo subsp. pepo	Cucurbita pepo subsp. pepo|Cucurbita moschata	XP_023553732.1	XP_023553732.1|XP_022963932.1	15	4.1	352.1	11S globulin seed storage protein 2-like
2	3	626.653	0.0186	9.9	12000000	19.32	10.23	96.5	12.38	58	RQHTFLFPPSSGSSSSR	1	2	19.32	10.23	626.653	1877.93	0.0186	(R)	RQHTFLFPPSSGSSSSR	(R)	Cucurbita pepo subsp. pepo	Cucurbita pepo subsp. pepo	XP_023553732.1	XP_023553732.1	16	4.1	352.1	11S globulin seed storage protein 2-like
1	2	655.804	0.0111	8.5	7030000	6.41	6.41	49	3.42	8	SFREEAQQCR	1	1	6.41	6.41	655.804	1310.59	0.0111	(R)	SFREEAQQCR	(L)	Cucurbita pepo subsp. pepo	Cucurbita pepo subsp. pepo|Cucurbita moschata	XP_023553732.1	XP_023553732.1|XP_022963932.1	17	4.1	352.1	11S globulin seed storage protein 2-like
1	2	623.323	0.0123	9.8	25200000	19.35	13.82	95.2	22.93	11	SPIAGYTSFFR	1	1	19.35	13.82	623.323	1245.63	0.0123	(K)	SPIAGYTSFFR	(A)	Cucurbita pepo subsp. pepo	Cucurbita pepo subsp. pepo|Cucurbita maxima	XP_023553732.1	XP_023553732.1|XP_022967670.1	18	4.1	352.1	11S globulin seed storage protein 2-like
1	2	564.277	0.0092	8.2	62900	12.9	6.72	81.6	2.1	3	VQHNMNTQR	2	3	15.45	8.94	564.277	1127.54	0.0087	(R)	VQHNMNTQR	(E)	Cucurbita pepo subsp. pepo	Cucurbita pepo subsp. pepo|Cucurbita maxima|Cucurbita moschata	XP_023553732.1	XP_023553732.1|XP_022967670.1|XP_022963932.1	19	4.1	352.1	11S globulin seed storage protein 2-like
2	2	1235.69	0.0169	6.9	123000000	25.34	25.34	98.2	39.7	22	ALPLQLLEQSFQITTAEAQQLK	2	4	25.34	25.34	1235.69	2470.36	0.0169	(R)	ALPLQLLEQSFQITTAEAQQLK	(Q)	Cucurbita maxima	Cucurbita pepo subsp. pepo|Cucurbita maxima|Cucurbita moschata	XP_022967670.1	XP_023553732.1|XP_022967670.1|XP_022963932.1	1	4.2	176.35	11S globulin seed storage protein 2-like
2	3	920.055	0.017	6.2	1430000	17.18	17.18	86.5	22.68	9	CDEQMSFLTPEEEEEELSESPSR	2	5	17.44	17.44	920.057	2758.13	0.0218	(K)	CDEQMSFLTPEEEEEELSESPSR powtórzony	(R)	Cucurbita maxima	Cucurbita pepo subsp. pepo|Cucurbita maxima|Cucurbita moschata	XP_022967670.1	XP_023553732.1|XP_022967670.1|XP_022963932.1	2	4.2	176.35	11S globulin seed storage protein 2-like
1	3	972.088	0.0153	5.3	814000	18.75	16.16	89.1	20.88	8	CDEQMSFLTPEEEEEELSESPSRR	2	2	18.75	16.16	972.088	2914.24	0.0153	(K)	CDEQMSFLTPEEEEEELSESPSRR	(E)	Cucurbita maxima	Cucurbita pepo subsp. pepo|Cucurbita maxima|Cucurbita moschata	XP_022967670.1	XP_023553732.1|XP_022967670.1|XP_022963932.1	3	4.2	176.35	11S globulin seed storage protein 2-like
4	3	1379.98	0.0231	5.6	11200000	19.74	19.74	83.1	33	15	FHSSPMLIYIEQGEGFLGLNYPGCAETYEAQSAQSSR	2	11	25.94	26.3	1379.98	4137.9	0.0226	(K)	FHSSPMLIYIEQGEGFLGLNYPGCAETYEAQSAQSSR	(R)	Cucurbita maxima	Cucurbita maxima	XP_022967670.1	XP_022967670.1	4	4.2	176.35	11S globulin seed storage protein 2-like
4	3	1039.86	0.0245	7.9	90800000	20.43	17.59	92.1	43.25	14	GNMFVIPQFYPALVQAGQEGFEWITFK	2	10	20.43	17.59	1039.86	3117.55	0.0245	(R)	GNMFVIPQFYPALVQAGQEGFEWITFK powt	(T)	Cucurbita maxima	Cucurbita pepo subsp. pepo|Cucurbita maxima|Cucurbita moschata	XP_022967670.1	XP_023553732.1|XP_022967670.1|XP_022963932.1	5	4.2	176.35	11S globulin seed storage protein 2-like
2	2	663.331	0.011	8.3	3090000	10.32	11.44	69.5	1.25	4	IGAGKEDDQHQK	2	5	10.61	10.61	663.331	1325.64	0.0095	(R)	IGAGKEDDQHQK	(V)	Cucurbita maxima	Cucurbita pepo subsp. pepo|Cucurbita maxima|Cucurbita moschata	XP_022967670.1	XP_023553732.1|XP_022967670.1|XP_022963932.1	6	4.2	176.35	11S globulin seed storage protein 2-like
5	3	964.462	0.023	8	27800000	23.04	23.04	97.7	27	27	LVYVVDGEANFQISDDYGNQVFNER	2	8	23.04	23.04	964.462	2891.35	0.023	(R)	LVYVVDGEANFQISDDYGNQVFNER powt	(V)	Cucurbita maxima	Cucurbita pepo subsp. pepo|Cucurbita maxima|Cucurbita moschata	XP_022967670.1	XP_023553732.1|XP_022967670.1|XP_022963932.1	7	4.2	176.35	11S globulin seed storage protein 2-like
1	2	623.323	0.0123	9.8	25200000	19.35	13.82	95.2	22.93	11	SPIAGYTSFFR	1	1	19.35	13.82	623.323	1245.63	0.0123	(K)	SPIAGYTSFFR	(A)	Cucurbita maxima	Cucurbita pepo subsp. pepo|Cucurbita maxima	XP_022967670.1	XP_023553732.1|XP_022967670.1	8	4.2	176.35	11S globulin seed storage protein 2-like
1	2	564.277	0.0092	8.2	62900	12.9	6.72	81.6	2.1	3	VQHNMNTQR	2	3	15.45	8.94	564.277	1127.54	0.0087	(R)	VQHNMNTQR	(E)	Cucurbita maxima	Cucurbita pepo subsp. pepo|Cucurbita maxima|Cucurbita moschata	XP_022967670.1	XP_023553732.1|XP_022967670.1|XP_022963932.1	9	4.2	176.35	11S globulin seed storage protein 2-like
4	2	1214.15	0.0142	5.8	125000000	24.97	21.07	94.4	30.43	18	ALPQQVLEQSFQITAGEAQQLK	2	6	25.38	20.99	1214.16	2427.29	0.0167	(R)	ALPQQVLEQSFQITAGEAQQLK	(Q)	Cucurbita pepo subsp. pepo	Cucurbita pepo subsp. pepo|Cucurbita maxima|Cucurbita moschata	XP_023532597.1	XP_023532597.1|XP_022995608.1|XP_022930973.1	1	5.1	239.93	11S globulin seed storage protein 2-like
1	3	938.176	0.0166	5.9	1730000	17.84	11.02	85	28.83	12	ALPQQVLEQSFQITAGEAQQLKQTR	1	1	17.84	11.02	938.176	2812.5	0.0166	(R)	ALPQQVLEQSFQITAGEAQQLKQTR	(S)	Cucurbita pepo subsp. pepo	Cucurbita pepo subsp. pepo|Cucurbita maxima	XP_023532597.1	XP_023532597.1|XP_022995608.1	2	5.1	239.93	11S globulin seed storage protein 2-like
3	3	769.386	0.0228	9.9	4460000	20.23	18.39	89.3	19.7	13	GHLFPNAQYNLHWSITDHR	2	6	20.23	18.39	769.386	2306.12	0.0228	(K)	GHLFPNAQYNLHWSITDHR	(L)	Cucurbita pepo subsp. pepo	Cucurbita pepo subsp. pepo	XP_023532597.1	XP_023532597.1	3	5.1	239.93	11S globulin seed storage protein 2-like
3	3	1012.17	0.0279	9.2	33200000	23.08	20.17	98.1	40.8	12	GNMFVIPQFYASLAQAGPEGFEWVTFK	2	5	23.08	20.17	1012.17	3034.48	0.0279	(K)	GNMFVIPQFYASLAQAGPEGFEWVTFK	(T)	Cucurbita pepo subsp. pepo	Cucurbita pepo subsp. pepo|Cucurbita moschata	XP_023532597.1	XP_023532597.1|XP_022930973.1	4	5.1	239.93	11S globulin seed storage protein 2-like
6	2	725.364	0.0092	6.3	34700000	12.62	12.08	75.1	15.43	40	HTFLFPPSSSSSR	2	11	16.91	16.58	725.366	1449.71	0.0127	(R)	HTFLFPPSSSSSR	(R)	Cucurbita pepo subsp. pepo	Cucurbita pepo subsp. pepo	XP_023532597.1	XP_023532597.1	5	5.1	239.93	11S globulin seed storage protein 2-like
2	2	1515.17	0.0139	4.6	19300000	24.21	24.21	96.3	32.07	10	IESEGGISEIWDESEEEFQCAGVAAMR	1	2	24.21	24.21	1515.17	3029.31	0.0139	(R)	IESEGGISEIWDESEEEFQCAGVAAMR	(S)	Cucurbita pepo subsp. pepo	Cucurbita pepo subsp. pepo|Cucurbita maxima|Cucurbita moschata	XP_023532597.1	XP_023532597.1|XP_022995608.1|XP_022930973.1	6	5.1	239.93	11S globulin seed storage protein 2-like
1	3	516.679	-0.0119	-7.7	1110000	8.99	8.99	81.1	30.52	13	INILNRLKLPILK	1	1	8.99	8.99	516.679	1548.04	-0.0119	(R)	INILNRLKLPILK	(Y)	Cucurbita pepo subsp. pepo	Cucurbita pepo subsp. pepo|Cucurbita maxima|Cucurbita moschata	XP_023532597.1	XP_023532597.1|XP_022995608.1|XP_022930973.1	7	5.1	239.93	11S globulin seed storage protein 2-like
1	2	671.884	0.0099	7.4	16600000	6.89	6.89	56.3	13.92	12	RGDMIVVPAGTVK	1	1	6.89	6.89	671.884	1342.75	0.0099	(R)	RGDMIVVPAGTVK	(W)	Cucurbita pepo subsp. pepo	Cucurbita pepo subsp. pepo|Cucurbita maxima|Cucurbita moschata	XP_023532597.1	XP_023532597.1|XP_022995608.1|XP_022930973.1	8	5.1	239.93	11S globulin seed storage protein 2-like
2	3	1062.48	0.0172	5.4	3930000	17.7	17.7	80.8	29.78	11	RIESEGGISEIWDESEEEFQCAGVAAMR	2	4	25.2	25.2	1062.49	3185.41	0.0266	(R)	RIESEGGISEIWDESEEEFQCAGVAAMR	(S)	Cucurbita pepo subsp. pepo	Cucurbita pepo subsp. pepo|Cucurbita maxima|Cucurbita moschata	XP_023532597.1	XP_023532597.1|XP_022995608.1|XP_022930973.1	9	5.1	239.93	11S globulin seed storage protein 2-like
1	4	1361.15	0.0149	2.7	2170000	15.13	15.13	69.6	38.13	14	SIIRPNSLTVPMFQSSPMLIYVEQGEGFMGLNFPGCAETYEAQSSQSSR	1	1	15.13	15.13	1361.15	5441.56	0.0149	(R)	SIIRPNSLTVPMFQSSPMLIYVEQGEGFMGLNFPGCAETYEAQSSQSSR	(R)	Cucurbita pepo subsp. pepo	Cucurbita pepo subsp. pepo	XP_023532597.1	XP_023532597.1	10	5.1	239.93	11S globulin seed storage protein 2-like
3	2	1637.31	0.011	3.4	28300000	20.96	16.29	90.6	46.8	9	SSEDLVNIFFGFDQELLAEAYNIPSDLAR	2	5	20.96	16.29	1637.31	3273.59	0.011	(R)	SSEDLVNIFFGFDQELLAEAYNIPSDLAR	(K)	Cucurbita pepo subsp. pepo	Cucurbita pepo subsp. pepo|Cucurbita moschata	XP_023532597.1	XP_023532597.1|XP_022930973.1	11	5.1	239.93	11S globulin seed storage protein 2-like
1	2	663.331	0.0094	7.1	2550000	5.34	8.58	55.7	1.23	7	VGAGKEEDQHQK	2	6	17.42	10.97	442.557	1325.64	0.012	(R)	VGAGKEEDQHQK	(V)	Cucurbita pepo subsp. pepo	Cucurbita pepo subsp. pepo|Cucurbita maxima|Cucurbita moschata	XP_023532597.1	XP_023532597.1|XP_022995608.1|XP_022930973.1	12	5.1	239.93	11S globulin seed storage protein 2-like
2	2	550.274	0.0104	9.4	2360000	14.5	9.23	88.8	1.53	7	VQHNMNTQK	2	3	17.69	14.26	550.274	1099.53	0.0105	(R)	VQHNMNTQK	(E)	Cucurbita pepo subsp. pepo	Cucurbita pepo subsp. pepo	XP_023532597.1	XP_023532597.1	13	5.1	239.93	11S globulin seed storage protein 2-like
4	2	1214.15	0.0142	5.8	125000000	24.97	21.07	94.4	30.43	18	ALPQQVLEQSFQITAGEAQQLK	2	6	25.38	20.99	1214.16	2427.29	0.0167	(R)	ALPQQVLEQSFQITAGEAQQLK powtórzony	(Q)	Cucurbita moschata	Cucurbita pepo subsp. pepo|Cucurbita maxima|Cucurbita moschata	XP_022930973.1	XP_023532597.1|XP_022995608.1|XP_022930973.1	1	5.2	205.72	11S globulin seed storage protein 2-like
1	3	938.176	0.0166	5.9	1730000	17.84	11.02	85	28.83	12	ALPQQVLEQSFQITAGEAQQLKQTR	1	1	17.84	11.02	938.176	2812.5	0.0166	(R)	ALPQQVLEQSFQITAGEAQQLKQTR	(S)	Cucurbita moschata	Cucurbita moschata	XP_022930973.1	XP_022930973.1	2	5.2	205.72	11S globulin seed storage protein 2-like
2	2	1162.55	0.0091	3.9	1550000	15.24	12.44	74.8	18.78	13	GHLFPNAQYNLHWSMTDHR	2	7	18.06	15.98	775.371	2324.08	0.0217	(K)	GHLFPNAQYNLHWSMTDHR	(L)	Cucurbita moschata	Cucurbita pepo subsp. pepo|Cucurbita maxima|Cucurbita moschata	XP_022930973.1	XP_023553732.1|XP_022995608.1|XP_022930973.1|XP_022963932.1	3	5.2	205.72	11S globulin seed storage protein 2-like
3	3	1012.17	0.0279	9.2	33200000	23.08	20.17	98.1	40.8	12	GNMFVIPQFYASLAQAGPEGFEWVTFK	2	5	23.08	20.17	1012.17	3034.48	0.0279	(K)	GNMFVIPQFYASLAQAGPEGFEWVTFK powt	(T)	Cucurbita moschata	Cucurbita pepo subsp. pepo|Cucurbita moschata	XP_022930973.1	XP_023532597.1|XP_022930973.1	4	5.2	205.72	11S globulin seed storage protein 2-like
2	2	1515.17	0.0139	4.6	19300000	24.21	24.21	96.3	32.07	10	IESEGGISEIWDESEEEFQCAGVAAMR	1	2	24.21	24.21	1515.17	3029.31	0.0139	(R)	IESEGGISEIWDESEEEFQCAGVAAMR	(S)	Cucurbita moschata	Cucurbita pepo subsp. pepo|Cucurbita maxima|Cucurbita moschata	XP_022930973.1	XP_023532597.1|XP_022995608.1|XP_022930973.1	5	5.2	205.72	11S globulin seed storage protein 2-like
1	3	516.679	-0.0119	-7.7	1110000	8.99	8.99	81.1	30.52	13	INILNRLKLPILK	1	1	8.99	8.99	516.679	1548.04	-0.0119	(R)	INILNRLKLPILK	(Y)	Cucurbita moschata	Cucurbita pepo subsp. pepo|Cucurbita maxima|Cucurbita moschata	XP_022930973.1	XP_023532597.1|XP_022995608.1|XP_022930973.1	6	5.2	205.72	11S globulin seed storage protein 2-like
1	2	671.884	0.0099	7.4	16600000	6.89	6.89	56.3	13.92	12	RGDMIVVPAGTVK	1	1	6.89	6.89	671.884	1342.75	0.0099	(R)	RGDMIVVPAGTVK	(W)	Cucurbita moschata	Cucurbita pepo subsp. pepo|Cucurbita maxima|Cucurbita moschata	XP_022930973.1	XP_023532597.1|XP_022995608.1|XP_022930973.1	7	5.2	205.72	11S globulin seed storage protein 2-like
2	3	1062.48	0.0172	5.4	3930000	17.7	17.7	80.8	29.78	11	RIESEGGISEIWDESEEEFQCAGVAAMR	2	4	25.2	25.2	1062.49	3185.41	0.0266	(R)	RIESEGGISEIWDESEEEFQCAGVAAMR	(S)	Cucurbita moschata	Cucurbita pepo subsp. pepo|Cucurbita maxima|Cucurbita moschata	XP_022930973.1	XP_023532597.1|XP_022995608.1|XP_022930973.1	8	5.2	205.72	11S globulin seed storage protein 2-like
3	2	1637.31	0.011	3.4	28300000	20.96	16.29	90.6	46.8	9	SSEDLVNIFFGFDQELLAEAYNIPSDLAR	2	5	20.96	16.29	1637.31	3273.59	0.011	(R)	SSEDLVNIFFGFDQELLAEAYNIPSDLAR powt	(K)	Cucurbita moschata	Cucurbita pepo subsp. pepo|Cucurbita moschata	XP_022930973.1	XP_023532597.1|XP_022930973.1	9	5.2	205.72	11S globulin seed storage protein 2-like
1	2	663.331	0.0094	7.1	2550000	5.34	8.58	55.7	1.23	7	VGAGKEEDQHQK	2	6	17.42	10.97	442.557	1325.64	0.012	(R)	VGAGKEEDQHQK	(V)	Cucurbita moschata	Cucurbita pepo subsp. pepo|Cucurbita maxima|Cucurbita moschata	XP_022930973.1	XP_023532597.1|XP_022995608.1|XP_022930973.1	10	5.2	205.72	11S globulin seed storage protein 2-like
2	2	550.274	0.0104	9.4	2360000	14.5	9.23	88.8	1.53	7	VQHNMNTQK	2	3	17.69	14.26	550.274	1099.53	0.0105	(R)	VQHNMNTQK powt	(E)	Cucurbita moschata	Cucurbita maxima|Cucurbita moschata	XP_022930973.1	XP_022995608.1|XP_022930973.1	11	5.2	205.72	11S globulin seed storage protein 2-like
2	3	633.345	0.0176	9.3	1130000	14.04	14.32	79.8	21.98	10	ILDRPMHIGFITMEPK	1	2	14.04	14.32	633.345	1898	0.0176	(R)	ILDRPMHIGFITMEPK	(S)	Cucurbita pepo subsp. pepo	Cucurbita pepo subsp. pepo|Cucurbita maxima|Cucurbita moschata|Cucurbita hybrid cultivar	XP_023511963.1	XP_023511963.1|XP_022985621.1|XP_022943526.1|BAA06186.1	1	6.1	136.31	vicilin-like seed storage protein At2g28490
3	2	912.465	0.012	6.6	1710000	17.3	16.19	79.2	25	10	IPAGSVFYMVNVGEGQR	1	3	17.3	16.19	912.465	1823.91	0.012	(R)	IPAGSVFYMVNVGEGQR	(L)	Cucurbita pepo subsp. pepo	Cucurbita pepo subsp. pepo|Cucurbita maxima|Cucurbita moschata|Cucurbita hybrid cultivar	XP_023511963.1	XP_023511963.1|XP_022985621.1|XP_022943526.1|BAA06186.1	2	6.1	136.31	vicilin-like seed storage protein At2g28490
1	4	702.395	0.0215	7.6	420000	22.27	16.94	95.9	21.77	11	LLSLQHEVVILPSAEIAPPHKEEEK	1	1	22.27	16.94	702.395	2806.53	0.0215	(R)	LLSLQHEVVILPSAEIAPPHKEEEK	(R)	Cucurbita pepo subsp. pepo	Cucurbita pepo subsp. pepo	XP_023511963.1	XP_023511963.1	3	6.1	136.31	vicilin-like seed storage protein At2g28490
2	3	643.353	0.0185	9.6	1260000	12.24	12.5	80.4	20.02	9	NRPQFLAGANSVFHTLR	1	2	12.24	12.5	643.353	1928.02	0.0185	(R)	NRPQFLAGANSVFHTLR	(S)	Cucurbita pepo subsp. pepo	Cucurbita pepo subsp. pepo	XP_023511963.1	XP_023511963.1	4	6.1	136.31	vicilin-like seed storage protein At2g28490
1	2	911.434	0.0097	5.3	539000	23.5	25.66	97.5	22.88	9	SPAVASAFDITEDDLDR	1	1	23.5	25.66	911.434	1821.85	0.0097	(R)	SPAVASAFDITEDDLDR	(L)	Cucurbita pepo subsp. pepo	Cucurbita pepo subsp. pepo	XP_023511963.1	XP_023511963.1	5	6.1	136.31	vicilin-like seed storage protein At2g28490
2	2	601.277	0.0099	8.2	1440000	15.85	10	81.6	10.33	10	SPDSYNLYDK	1	2	15.85	10	601.277	1201.54	0.0099	(K)	SPDSYNLYDK	(T)	Cucurbita pepo subsp. pepo	Cucurbita pepo subsp. pepo|Cucurbita maxima|Cucurbita moschata|Cucurbita hybrid cultivar	XP_023511963.1	XP_023511963.1|XP_022985621.1|XP_022943526.1|BAA06186.1	6	6.1	136.31	vicilin-like seed storage protein At2g28490
2	2	790.879	0.0119	7.6	3340000	16.17	13.41	87	29.65	13	TGPFEFFGFTTSSR	1	2	16.17	13.41	790.879	1580.74	0.0119	(R)	TGPFEFFGFTTSSR	(R)	Cucurbita pepo subsp. pepo	Cucurbita pepo subsp. pepo|Cucurbita maxima|Cucurbita moschata|Cucurbita hybrid cultivar	XP_023511963.1	XP_023511963.1|XP_022985621.1|XP_022943526.1|BAA06186.1	7	6.1	136.31	vicilin-like seed storage protein At2g28490
2	2	703.393	0.0104	7.4	428000	14.94	8.47	77.6	14.95	9	VGLIYKDELAER	2	4	14.94	8.47	703.393	1405.77	0.0104	(K)	VGLIYKDELAER	(R)	Cucurbita pepo subsp. pepo	Cucurbita pepo subsp. pepo|Cucurbita maxima|Cucurbita moschata|Cucurbita hybrid cultivar	XP_023511963.1	XP_023511963.1|XP_022985621.1|XP_022943526.1|BAA06186.1	8	6.1	136.31	vicilin-like seed storage protein At2g28490
2	3	633.345	0.0176	9.3	1130000	14.04	14.32	79.8	21.98	10	ILDRPMHIGFITMEPK	1	2	14.04	14.32	633.345	1898	0.0176	(R)	ILDRPMHIGFITMEPK	(S)	Cucurbita hybrid cultivar	Cucurbita pepo subsp. pepo|Cucurbita maxima|Cucurbita moschata|Cucurbita hybrid cultivar	BAA06186.1	XP_023511963.1|XP_022985621.1|XP_022943526.1|BAA06186.1	1	6.2	97.59	preproMP27-MP32
3	2	912.465	0.012	6.6	1710000	17.3	16.19	79.2	25	10	IPAGSVFYMVNVGEGQR	1	3	17.3	16.19	912.465	1823.91	0.012	(R)	IPAGSVFYMVNVGEGQR	(L)	Cucurbita hybrid cultivar	Cucurbita pepo subsp. pepo|Cucurbita maxima|Cucurbita moschata|Cucurbita hybrid cultivar	BAA06186.1	XP_023511963.1|XP_022985621.1|XP_022943526.1|BAA06186.1	2	6.2	97.59	preproMP27-MP32
1	2	918.444	0.015	8.2	542000	19.29	22.98	88.6	23.65	11	SPAVATAFDITEDDLDR	1	1	19.29	22.98	918.444	1835.87	0.015	(R)	SPAVATAFDITEDDLDR	(L)	Cucurbita hybrid cultivar	Cucurbita maxima|Cucurbita hybrid cultivar	BAA06186.1	XP_022985621.1|BAA06186.1	3	6.2	97.59	preproMP27-MP32
2	2	601.277	0.0099	8.2	1440000	15.85	10	81.6	10.33	10	SPDSYNLYDK	1	2	15.85	10	601.277	1201.54	0.0099	(K)	SPDSYNLYDK	(T)	Cucurbita hybrid cultivar	Cucurbita pepo subsp. pepo|Cucurbita maxima|Cucurbita moschata|Cucurbita hybrid cultivar	BAA06186.1	XP_023511963.1|XP_022985621.1|XP_022943526.1|BAA06186.1	4	6.2	97.59	preproMP27-MP32
2	2	790.879	0.0119	7.6	3340000	16.17	13.41	87	29.65	13	TGPFEFFGFTTSSR	1	2	16.17	13.41	790.879	1580.74	0.0119	(R)	TGPFEFFGFTTSSR	(R)	Cucurbita hybrid cultivar	Cucurbita pepo subsp. pepo|Cucurbita maxima|Cucurbita moschata|Cucurbita hybrid cultivar	BAA06186.1	XP_023511963.1|XP_022985621.1|XP_022943526.1|BAA06186.1	5	6.2	97.59	preproMP27-MP32
2	2	703.393	0.0104	7.4	428000	14.94	8.47	77.6	14.95	9	VGLIYKDELAER	2	4	14.94	8.47	703.393	1405.77	0.0104	(K)	VGLIYKDELAER	(R)	Cucurbita hybrid cultivar	Cucurbita pepo subsp. pepo|Cucurbita maxima|Cucurbita moschata|Cucurbita hybrid cultivar	BAA06186.1	XP_023511963.1|XP_022985621.1|XP_022943526.1|BAA06186.1	6	6.2	97.59	preproMP27-MP32
1	2	878.966	0.0105	6	1170000	13.3	10.82	83	25.58	11	DALIGLVPVETAEACAK	2	2	18.85	14.62	878.967	1756.91	0.0126	(R)	DALIGLVPVETAEACAK	(A)	Cucurbita moschata	Cucurbita pepo subsp. pepo|Cucurbita maxima|Cucurbita moschata	XP_022923933.1	XP_023519948.1|XP_023001528.1|XP_022923933.1	1	7.1	133.1	11-beta-hydroxysteroid dehydrogenase 1B-like
1	2	823.433	0.0126	7.7	1910000	22.61	15.98	92.8	18.43	9	ILAMPAAGASESDALTK	2	2	22.61	15.98	823.433	1645.85	0.0126	(R)	ILAMPAAGASESDALTK	(Q)	Cucurbita moschata	Cucurbita pepo subsp. pepo|Cucurbita maxima|Cucurbita moschata	XP_022923933.1	XP_023519948.1|XP_023001528.1|XP_022923933.1	2	7.1	133.1	11-beta-hydroxysteroid dehydrogenase 1B-like
1	2	788.943	0.0111	7	2940000	16.95	11.72	88.7	26.02	21	IVALSAPPAWMPAPR	2	2	20.55	14.08	788.944	1576.87	0.0137	(K)	IVALSAPPAWMPAPR	(M)	Cucurbita moschata	Cucurbita pepo subsp. pepo|Cucurbita maxima|Cucurbita moschata	XP_022923933.1	XP_023519948.1|XP_023001528.1|XP_022923933.1	3	7.1	133.1	11-beta-hydroxysteroid dehydrogenase 1B-like
2	3	970.511	0.0204	7	2760000	19.43	19.43	85.9	35.25	13	LDHLVNNAAITHLVMFEDIADIAAFR	1	2	19.43	19.43	970.511	2909.5	0.0204	(R)	LDHLVNNAAITHLVMFEDIADIAAFR	(Q)	Cucurbita moschata	Cucurbita pepo subsp. pepo|Cucurbita maxima|Cucurbita moschata	XP_022923933.1	XP_023519948.1|XP_023001528.1|XP_022923933.1	4	7.1	133.1	11-beta-hydroxysteroid dehydrogenase 1B-like
3	3	810.12	0.0236	9.7	7820000	18.27	13.49	83.7	34	12	VELAPEIGVTIVTPGFVESELTK	2	5	19.68	18.29	1214.67	2428.32	0.0153	(R)	VELAPEIGVTIVTPGFVESELTK	(G)	Cucurbita moschata	Cucurbita pepo subsp. pepo|Cucurbita moschata	XP_022923933.1	XP_023519948.1|XP_022923933.1	5	7.1	133.1	11-beta-hydroxysteroid dehydrogenase 1B-like
3	3	726.726	0.0205	9.4	3970000	19.59	18.36	93.3	22.28	9	VVLITGASSGIGEHLAYEYAK	2	7	19.59	18.36	726.726	2178.14	0.0205	(K)	VVLITGASSGIGEHLAYEYAK	(R)	Cucurbita moschata	Cucurbita pepo subsp. pepo|Cucurbita maxima|Cucurbita moschata	XP_022923933.1	XP_023519994.1|XP_023519948.1|XP_023001528.1|XP_023000976.1|XP_022923933.1|XP_022923773.1	6	7.1	133.1	11-beta-hydroxysteroid dehydrogenase 1B-like
1	2	642.34	0.009	7	196000	12.39	7.9	69.7	18.13	4	YYGSPDVITIR	1	1	12.39	7.9	642.34	1283.66	0.009	(R)	YYGSPDVITIR	(A)	Cucurbita moschata	Cucurbita moschata	XP_022923933.1	XP_022923933.1	7	7.1	133.1	11-beta-hydroxysteroid dehydrogenase 1B-like
1	3	669.324	0.0176	8.8	574000	12.59	10.62	67.2	15.18	9	AHEEIGSCVQYLTQQSR	2	4	19.7	19.7	1003.48	2005.94	0.0151	(R)	AHEEIGSCVQYLTQQSR	(D)	Cucurbita pepo subsp. pepo	Cucurbita pepo subsp. pepo	XP_023520423.1	XP_023520423.1	1	8.1	74.43	2S albumin-like
1	2	839.907	0.014	8.3	3310000	22.91	20.63	95.7	29.77	10	CELLEQIAMWETR	1	1	22.91	20.63	839.907	1678.79	0.014	(R)	CELLEQIAMWETR	(K)	Cucurbita pepo subsp. pepo	Cucurbita pepo subsp. pepo|Cucurbita moschata	XP_023520423.1	XP_023520423.1|XP_022932144.1	2	8.1	74.43	2S albumin-like
1	2	650.264	0.0119	9.2	8110000	15.47	15.47	88.6	8.27	9	EGQVFDECCR	1	1	15.47	15.47	650.264	1299.51	0.0119	(R)	EGQVFDECCR	(E)	Cucurbita pepo subsp. pepo	Cucurbita pepo subsp. pepo|Cucurbita moschata	XP_023520423.1	XP_023520423.1|XP_022932144.1	3	8.1	74.43	2S albumin-like
1	2	935.931	0.0149	8	7080000	16.35	9.83	87.6	23.22	11	NLPSMCGLRPQQCYF	1	1	16.35	9.83	935.931	1870.84	0.0149	(R)	NLPSMCGLRPQQCYF	(-)	Cucurbita pepo subsp. pepo	Cucurbita pepo subsp. pepo	XP_023520423.1	XP_023520423.1	4	8.1	74.43	2S albumin-like
1	2	576.276	0.0114	9.9	1070000	16.54	13.21	90.2	6.72	9	AYDPTVGGTDR	1	1	16.54	13.21	576.276	1151.53	0.0114	(R)	AYDPTVGGTDR	(-)	Cucurbita moschata	Cucurbita maxima|Cucurbita moschata	XP_022940345.1	XP_022971427.1|XP_022940345.1	1	9.1	63.21	11 kDa late embryogenesis abundant protein-like
1	2	516.762	0.0102	9.9	826000	16.02	10.87	88.9	3.33	8	ESAANVGASAR	1	1	16.02	10.87	516.762	1032.51	0.0102	(K)	ESAANVGASAR	(A)	Cucurbita moschata	Cucurbita moschata|Cucurbita pepo subsp. pepo	XP_022940345.1	XP_022940345.1|XP_023539729.1	2	9.1	63.21	11 kDa late embryogenesis abundant protein-like
2	2	683.37	0.0104	7.6	1840000	15.68	12.09	78.6	3.25	8	LHGAELDKQQAR	2	3	15.68	12.09	683.37	1365.72	0.0104	(R)	LHGAELDKQQAR	(A)	Cucurbita moschata	Cucurbita pepo subsp. pepo|Cucurbita maxima|Cucurbita moschata	XP_022940345.1	XP_023539730.1|XP_023539729.1|XP_022971427.1|XP_022940345.1	3	9.1	63.21	11 kDa late embryogenesis abundant protein-like
2	2	823.913	0.0105	6.4	4180000	14	14	71.4	4.53	8	TGAHTGLTTGTGTGTGTR	2	3	14.97	14.97	823.914	1646.81	0.0124	(K)	TGAHTGLTTGTGTGTGTR	(A)	Cucurbita moschata	Cucurbita pepo subsp. pepo|Cucurbita moschata	XP_022940345.1	XP_023539730.1|XP_023539729.1|XP_022940345.1	4	9.1	63.21	11 kDa late embryogenesis abundant protein-like
1	2	726.343	0.0124	8.6	222000	13.53	10.1	75.5	18.87	9	AMGFMPDQIDQAK	1	1	13.53	10.1	726.343	1451.67	0.0124	(R)	AMGFMPDQIDQAK	(R)	Cucurbita moschata	Cucurbita moschata	XP_022928435.1	XP_022928435.1	1	10.1	62.5	oleosin 18.2 kDa-like
1	2	614.284	0.0111	9	1220000	17.53	17.53	86.7	11.08	9	MQDMAGYVGQK	1	1	17.53	17.53	614.284	1227.55	0.0111	(R)	MQDMAGYVGQK	(T)	Cucurbita moschata	Cucurbita pepo subsp. pepo|Cucurbita maxima|Cucurbita moschata	XP_022928435.1	XP_023529459.1|XP_023528638.1|XP_023523068.1|XP_022989214.1|XP_022983488.1|XP_022928435.1	2	10.1	62.5	oleosin 18.2 kDa-like
2	2	637.844	0.0112	8.8	3080000	13.88	10.32	76.7	6.57	9	TKDLGQEIQSR	2	3	13.88	10.32	637.844	1274.67	0.0112	(K)	TKDLGQEIQSR	(T)	Cucurbita moschata	Cucurbita pepo subsp. pepo|Cucurbita maxima|Cucurbita moschata	XP_022928435.1	XP_023528638.1|XP_023523068.1|XP_022989214.1|XP_022983488.1|XP_022928435.1|XP_022935477.1	3	10.1	62.5	oleosin 18.2 kDa-like
2	2	632.815	0.0096	7.6	2820000	12.86	9.71	73.5	2.4	6	TTTTTAAQEQGR	2	3	17.56	13.58	632.815	1264.61	0.01	(R)	TTTTTAAQEQGR	(R)	Cucurbita moschata	Cucurbita moschata	XP_022928435.1	XP_022928435.1	4	10.1	62.5	oleosin 18.2 kDa-like
1	2	696.339	0.0079	5.7	195000	14.71	9.84	79.3	15.6	3	AAGFMPDQIDQAK	1	1	14.71	9.84	696.339	1391.66	0.0079	(R)	AAGFMPDQIDQAK	(R)	Cucurbita maxima	Cucurbita pepo subsp. pepo|Cucurbita maxima|Cucurbita moschata	XP_022983488.1	XP_023528638.1|XP_023523068.1|XP_022983488.1|XP_022935477.1	1	10.2	46.12	oleosin 18.2 kDa-like
1	2	614.284	0.0111	9	1220000	17.53	17.53	86.7	11.08	9	MQDMAGYVGQK	1	1	17.53	17.53	614.284	1227.55	0.0111	(R)	MQDMAGYVGQK	(T)	Cucurbita maxima	Cucurbita pepo subsp. pepo|Cucurbita maxima|Cucurbita moschata	XP_022983488.1	XP_023529459.1|XP_023528638.1|XP_023523068.1|XP_022989214.1|XP_022983488.1|XP_022928435.1	2	10.2	46.12	oleosin 18.2 kDa-like
2	2	637.844	0.0112	8.8	3080000	13.88	10.32	76.7	6.57	9	TKDLGQEIQSR	2	3	13.88	10.32	637.844	1274.67	0.0112	(K)	TKDLGQEIQSR	(T)	Cucurbita maxima	Cucurbita pepo subsp. pepo|Cucurbita maxima|Cucurbita moschata	XP_022983488.1	XP_023528638.1|XP_023523068.1|XP_022989214.1|XP_022983488.1|XP_022928435.1|XP_022935477.1	3	10.2	46.12	oleosin 18.2 kDa-like
1	2	509.256	0.0095	9.3	644000	12.91	11.24	83.6	2.92	8	EAGQEIQSR	1	1	12.91	11.24	509.256	1017.5	0.0095	(K)	EAGQEIQSR	(A)	Cucurbita moschata	Cucurbita moschata	XP_022939508.1	XP_022939508.1	1	11.1	45.21	oleosin 18.2 kDa-like
1	2	621.292	0.011	8.8	667000	15.7	14.15	85.7	10.3	9	MQEMAGYVGQK	1	1	15.7	14.15	621.292	1241.57	0.011	(R)	MQEMAGYVGQK	(T)	Cucurbita moschata	Cucurbita pepo subsp. pepo|Cucurbita maxima|Cucurbita moschata	XP_022939508.1	XP_023550995.1|XP_022993105.1|XP_022939508.1	2	11.1	45.21	oleosin 18.2 kDa-like
1	3	839.769	0.0172	6.8	800000	6.51	6.51	31.7	11.15	9	QVQVHHQQQRPSYLQEPTWK	1	1	6.51	6.51	839.769	2517.27	0.0172	(R)	QVQVHHQQQRPSYLQEPTWK	(L)	Cucurbita moschata	Cucurbita pepo subsp. pepo|Cucurbita moschata	XP_022939508.1	XP_023550995.1|XP_022939508.1	3	11.1	45.21	oleosin 18.2 kDa-like
1	2	623.828	0.01	8	153000	10.09	8.5	59	2.5	3	TKEAGQEIQSR	1	1	10.09	8.5	623.828	1246.64	0.01	(K)	TKEAGQEIQSR	(A)	Cucurbita moschata	Cucurbita pepo subsp. pepo|Cucurbita moschata	XP_022939508.1	XP_023550995.1|XP_022939508.1	4	11.1	45.21	oleosin 18.2 kDa-like
2	2	839.886	0.0128	7.6	4390000	9.2	7.22	65.7	18.9	10	CDMLEEIAREEQR	1	2	9.2	7.22	839.886	1678.75	0.0128	(R)	CDMLEEIAREEQR	(Q)	Cucurbita hybrid cultivar	UNREADABLE|Cucurbita pepo subsp. pepo|Cucurbita maxima|Cucurbita moschata|Cucurbita hybrid cultivar	BAA03993.1	sp|Q39649.1|2SS_CUCMA|XP_023545481.1|XP_022993226.1|XP_022942593.1|BAA03993.1	1	12.1	44.68	prepro2S albumin
2	2	608.726	0.0091	7.5	1470000	12.25	12.25	63.9	5.17	8	EGGSFDECCR	1	2	12.25	12.25	608.726	1216.44	0.0091	(R)	EGGSFDECCR	(E)	Cucurbita hybrid cultivar	UNREADABLE|Cucurbita pepo subsp. pepo|Cucurbita maxima|Cucurbita hybrid cultivar	BAA03993.1	sp|Q39649.1|2SS_CUCMA|XP_023545481.1|XP_022993226.1|BAA03993.1	2	12.1	44.68	prepro2S albumin
2	2	714.871	0.014	9.8	66200000	8.24	6.95	57	12.67	17	NLPSMCGIRPQR	1	2	8.24	6.95	714.871	1428.72	0.014	(R)	NLPSMCGIRPQR	(C)	Cucurbita hybrid cultivar	UNREADABLE|Cucurbita pepo subsp. pepo|Cucurbita maxima|Cucurbita moschata|Cucurbita hybrid cultivar	BAA03993.1	sp|Q39649.1|2SS_CUCMA|XP_023545481.1|XP_022993226.1|XP_022942593.1|BAA03993.1	3	12.1	44.68	prepro2S albumin
3	3	680.298	0.0176	8.6	29100000	14.99	15.08	71	17.55	11	NVDEECRCDMLEEIAR	1	3	14.99	15.08	680.298	2038.86	0.0176	(K)	NVDEECRCDMLEEIAR	(E)	Cucurbita hybrid cultivar	UNREADABLE|Cucurbita pepo subsp. pepo|Cucurbita maxima|Cucurbita moschata|Cucurbita hybrid cultivar	BAA03993.1	sp|Q39649.1|2SS_CUCMA|XP_023545481.1|XP_022993226.1|XP_022942593.1|BAA03993.1	4	12.1	44.68	prepro2S albumin
1	3	549.937	0.0151	9.2	545000	12.11	12.2	80.5	11.13	8	ASSVEDIDEERLER	1	1	12.11	12.2	549.937	1647.78	0.0151	(K)	ASSVEDIDEERLER	(V)	Cucurbita pepo subsp. pepo	Cucurbita pepo subsp. pepo	XP_023551832.1	XP_023551832.1	1	13.1	35.66	NADPH-dependent aldehyde reductase 1, chloroplastic-like
1	2	745.901	0.0094	6.3	223000	23.14	19.73	93.8	18.28	10	IDILVNNAAEQYK	2	2	23.55	21.3	745.901	1490.78	0.009	(R)	IDILVNNAAEQYK	(A)	Cucurbita pepo subsp. pepo	Cucurbita pepo subsp. pepo|Cucurbita maxima|Cucurbita moschata	XP_023551832.1	XP_023551832.1|XP_022985493.1|XP_022922637.1	2	13.1	35.66	NADPH-dependent aldehyde reductase 1, chloroplastic-like
1	2	681.845	0.0077	5.7	558000	18.81	13.79	81	10.57	10	ETTGGILEQTGEK	2	3	18.81	13.79	681.845	1362.67	0.0077	(K)	ETTGGILEQTGEK	(V)	Cucurbita pepo subsp. pepo	Cucurbita pepo subsp. pepo|Cucurbita maxima|Cucurbita moschata	XP_023548700.1	XP_023548700.1|XP_022991581.1|XP_022953941.1	1	14.1	34.23	late embryogenesis abundant protein 7
1	2	531.771	0.0106	9.9	451000	15.42	13.61	81.9	6.43	9	SMAQGAAEAVK	1	1	15.42	13.61	531.771	1062.52	0.0106	(K)	SMAQGAAEAVK	(S)	Cucurbita pepo subsp. pepo	Cucurbita maxima|Cucurbita pepo subsp. pepo	XP_023548700.1	XP_022991676.1|XP_023548700.1	2	14.1	34.23	late embryogenesis abundant protein 7
1	3	735.367	0.0209	9.5	739000	10.88	9.6	67.4	26.58	9	TQPDKLSLGELWDMTEANR	1	1	10.88	9.6	735.367	2204.07	0.0209	(R)	TQPDKLSLGELWDMTEANR	(L)	Cucurbita maxima	Cucurbita pepo subsp. pepo|Cucurbita maxima	XP_023006084.1	XP_023547968.1|XP_023006084.1	1	15.1	26.15	peroxygenase-like
2	3	815.109	0.0216	8.9	1870000	15.27	10.65	79.4	34.13	10	TQQGWIPSPFLPIYIYNIHR	1	2	15.27	10.65	815.109	2443.29	0.0216	(R)	TQQGWIPSPFLPIYIYNIHR	(D)	Cucurbita maxima	Cucurbita pepo subsp. pepo|Cucurbita maxima|Cucurbita moschata	XP_023006084.1	XP_023547968.1|XP_023006084.1|XP_022959257.1	2	15.1	26.15	peroxygenase-like
1	2	688.843	0.013	9.4	14600000	21.66	19.06	91.9	21.53	10	MQGIDVGQMLER	1	1	21.66	19.06	688.843	1376.67	0.013	(R)	MQGIDVGQMLER	(A)	Cucurbita maxima	Cucurbita pepo subsp. pepo|Cucurbita maxima|Cucurbita moschata	XP_022984798.1	XP_023522829.1|XP_022984798.1|XP_022942616.1	1	16.1	21.66	2S sulfur-rich seed storage protein 2-like
1	2	800.425	0.0091	5.7	642000	21	19.42	94	15.97	9	VQIEDNQLVVTGER	2	2	21	19.42	800.425	1599.83	0.0091	(K)	VQIEDNQLVVTGER	(K)	Cucurbita maxima	Cucurbita pepo subsp. pepo|Cucurbita maxima|Cucurbita moschata	XP_022982419.1	XP_023524411.1|XP_022982419.1|XP_022941228.1	1	17.1	21	17.1 kDa class II heat shock protein-like
2	3	805.401	0.0188	7.8	996000	14.57	14.57	60.4	19.17	10	QTDEYGNVISDTAQHVDPLRR	2	4	19.81	19.81	805.398	2414.17	0.0087	(R)	QTDEYGNVISDTAQHVDPLRR	(T)	Cucurbita pepo subsp. pepo	Cucurbita pepo subsp. pepo	XP_023553197.1	XP_023553197.1	1	18.1	19.81	dehydrin DHN3-like
1	2	755.932	0.0094	6.2	336000	18.4	13.6	87.3	21.22	9	VQIVGDDLLVTNPK	2	2	18.4	13.6	755.932	1510.85	0.0094	(K)	VQIVGDDLLVTNPK	(R)	Cucurbita maxima	Cucurbita pepo subsp. pepo|Cucurbita maxima|Cucurbita moschata	XP_022972676.1	QAY29594.1|XP_023518286.1|XP_023543795.1|XP_022972676.1|XP_022977801.1|XP_022925911.1|XP_022963125.1	1	19.1	18.4	enolase-like
2	2	729.826	0.0119	8.1	2910000	17.18	16.69	84.7	18.58	10	QSFDVECGDVFR	1	2	17.18	16.69	729.826	1458.63	0.0119	(R)	QSFDVECGDVFR	(V)	Cucurbita pepo subsp. pepo	Cucurbita pepo subsp. pepo	XP_023547904.1	XP_023547904.1	1	20.1	17.18	sucrose-binding protein-like
1	2	559.793	0.0105	9.3	447000	15.78	11.4	89.7	8.68	7	ATVEVVETDR	1	1	15.78	11.4	559.793	1118.57	0.0105	(K)	ATVEVVETDR	(G)	Cucurbita maxima	Cucurbita pepo subsp. pepo|Cucurbita maxima	XP_022982941.1	XP_023527803.1|XP_022982941.1	1	21.1	15.78	embryonic protein DC-8
2	2	766.394	0.0103	6.7	2400000	12.3	12.3	64	8.95	12	VPSSGAGETTAIANTR	2	4	14.44	8.74	766.394	1531.77	0.0105	(K)	VPSSGAGETTAIANTR	(I)	Cucurbita moschata	Cucurbita pepo subsp. pepo|Cucurbita moschata	XP_022939316.1	XP_023550896.1|XP_022939316.1	1	22.1	14.44	17.4 kDa class I heat shock protein-like
1	2	497.783	0.0007	0.7	3870000	12.18	1.52	79	17.2	9	FVAAQFRR	2	2	14.4	1.94	497.784	994.558	0.0019	(K)	FVAAQFRR	(L)	Cucurbita moschata	Cucurbita pepo subsp. pepo|Cucurbita moschata	XP_022925648.1	XP_023543209.1|XP_022925648.1	1	23.1	14.4	protein CNGC15b-like
1	2	670.925	-0.0128	-9.5	11400000	14.2	7.25	65.7	26.78	12	ILVIVFLAPDLK	1	1	14.2	7.25	670.925	1340.86	-0.0128	(R)	ILVIVFLAPDLK	(T)	Cucurbita moschata	Cucurbita moschata	XP_022943111.1	XP_022943111.1	1	24.1	14.2	alpha-galactosidase 3-like isoform X2
1	2	473.748	-0.0058	-6.2	558000	14.03	0.15	85.1	9.15	9	NTIEVNTR	1	1	14.03	0.15	473.748	946.495	-0.0058	(R)	NTIEVNTR	(N)	Cucurbita maxima	Cucurbita maxima	XP_022967448.1	XP_022967470.1|XP_022967469.1|XP_022967468.1|XP_022967465.1|XP_022967456.1|XP_022967451.1|XP_022967448.1	1	25.1	14.03	fibroin heavy chain-like isoform X3
1	2	581.322	0.0096	8.3	1080000	13.06	2.95	75	17.77	8	AGIALNDNFVK	1	1	13.06	2.95	581.322	1161.63	0.0096	(K)	AGIALNDNFVK	(L)	Cucurbita maxima	Cucurbita pepo subsp. pepo|Cucurbita maxima|Cucurbita moschata	XP_022990685.1	XP_023519191.1|XP_023551034.1|XP_023553624.1|XP_023000806.1|XP_022992617.1|XP_022990685.1|XP_022923635.1|XP_022938664.1	1	26.1	13.06	glyceraldehyde-3-phosphate dehydrogenase 2, cytosolic-like
1	2	738.394	0.0122	8.3	377000	12.94	14.49	73.7	13.97	9	ASMLVVGSHGYGAVK	1	1	12.94	14.49	738.394	1475.77	0.0122	(R)	ASMLVVGSHGYGAVK	(R)	Cucurbita maxima	Cucurbita pepo subsp. pepo|Cucurbita maxima|Cucurbita moschata	XP_022991246.1	XP_023547994.1|XP_022991248.1|XP_022991246.1|XP_022953723.1|XP_022953722.1|XP_022953721.1	1	27.1	12.94	universal stress protein A-like protein
1	3	688.365	0.0201	9.8	4530000	12.24	4.28	76.3	29.7	53	IWPFSEGETERPFNLLK	1	1	12.24	4.28	688.365	2063.06	0.0201	(R)	IWPFSEGETERPFNLLK	(Q)	Cucurbita maxima	Cucurbita maxima|Cucurbita moschata	XP_022991956.1	XP_022991956.1|XP_022953499.1	1	28.1	12.24	sucrose-binding protein-like
1	2	925.955	0.0112	6.1	998000	12.09	7.65	81.4	38.57	11	AFMVPEEVIEEIMDAK	1	1	12.09	7.65	925.955	1850.89	0.0112	(K)	AFMVPEEVIEEIMDAK	(R)	Cucurbita maxima	Cucurbita maxima	BAB78478.1	BAB78478.1	1	29.1	12.09	preproMP73
1	2	498.745	0.0089	8.9	464000	11.97	11.97	78	5.27	8	ETSAFANTR	1	1	11.97	11.97	498.745	996.475	0.0089	(R)	ETSAFANTR	(I)	Cucurbita maxima	Cucurbita pepo subsp. pepo|Cucurbita maxima|Cucurbita moschata	XP_022978126.1	XP_023529952.1|XP_023529916.1|XP_022978171.1|XP_022978151.1|XP_022978137.1|XP_022978126.1|XP_022957035.1	1	30.1	11.97	17.8 kDa class I heat shock protein-like
1	2	613.304	0.0017	1.4	4650000	11.75	4.43	68.5	17.47	9	FGEEMKKNSR	1	1	11.75	4.43	613.304	1225.6	0.0017	(K)	FGEEMKKNSR	(L)	Cucurbita maxima	Cucurbita pepo subsp. pepo|Cucurbita maxima	XP_022992577.1	XP_023551251.1|XP_022992577.1	1	31.1	11.75	adenosine kinase 2-like
1	3	572.004	-0.0041	-2.4	575000	9.85	5.22	66.8	20.45	10	LALTNGNALISVFRPK	2	3	11.71	5.61	429.259	1714	0.0125	(R)	LALTNGNALISVFRPK	(V)	Cucurbita maxima	Cucurbita pepo subsp. pepo|Cucurbita maxima|Cucurbita moschata	XP_022983083.1	XP_023528901.1|XP_022983083.1|XP_022935582.1	1	32.1	11.71	uncharacterized protein LOC111481736
1	2	766.407	0.0119	7.8	702000	11.68	4.73	75.5	24.1	12	SGTLFMPGVPGAIER	1	1	11.68	4.73	766.407	1531.79	0.0119	(K)	SGTLFMPGVPGAIER	(V)	Cucurbita moschata	Cucurbita pepo subsp. pepo|Cucurbita moschata	XP_022929874.1	XP_023549320.1|XP_022929874.1	1	33.1	11.68	oil body-associated protein 1A-like
1	2	442.259	-0.0012	-1.3	241000	10.89	8.99	67.5	12.43	10	DRLGGIPR	1	1	10.89	8.99	442.259	883.511	-0.0012	(R)	DRLGGIPR	(S)	Cucurbita moschata	Cucurbita pepo subsp. pepo|Cucurbita moschata	XP_022935324.1	XP_023527121.1|XP_022935324.1	1	34.1	10.89	uncharacterized protein LOC111442246
1	2	745.41	0.012	8	5190000	10.81	2.79	67.5	24.28	9	EALLFKNEALADR	1	1	10.81	2.79	745.41	1489.8	0.012	(K)	EALLFKNEALADR	(V)	Cucurbita maxima	Cucurbita pepo subsp. pepo|Cucurbita maxima|Cucurbita moschata	XP_022999530.1	XP_023545701.1|XP_022999530.1|XP_022946691.1	1	35.1	10.81	pre-mRNA cleavage factor Im 25 kDa subunit 1-like
1	2	459.27	0.0006	0.6	8370000	10.73	9.29	87.5	17.12	13	AYLAAPRR	2	2	10.73	9.29	459.27	917.532	0.0006	(R)	AYLAAPRR	(V)	Cucurbita moschata	Cucurbita moschata	XP_022936763.1	XP_022936764.1|XP_022936763.1	1	36.1	10.73	uncharacterized protein LOC111443257
1	2	567.782	0.0003	0.3	993000	10.53	1.99	74.1	8.12	9	VLQGMNSTER	1	1	10.53	1.99	567.782	1134.56	0.0003	(R)	VLQGMNSTER	(N)	Cucurbita maxima	Cucurbita maxima	XP_022978148.1	XP_022978148.1	1	37.1	10.53	serine/threonine-protein kinase STN8, chloroplastic
2	2	803.862	0.0085	5.3	1250000	10.26	10.26	73.6	4.47	8	AEQFGQQHTTGSQTS	1	2	10.26	10.26	803.862	1606.71	0.0085	(R)	AEQFGQQHTTGSQTS	(-)	Cucurbita maxima	Cucurbita pepo subsp. pepo|Cucurbita maxima|Cucurbita moschata	XP_022985515.1	XP_023552038.1|XP_022985515.1|XP_022922817.1	1	38.1	10.26	oleosin 1-like
1	2	830.462	0.0108	6.5	702000	10.15	10.15	60.8	15.2	9	GAAEYAGAIAAKPLSAAK	1	1	10.15	10.15	830.462	1659.91	0.0108	(K)	GAAEYAGAIAAKPLSAAK	(N)	Cucurbita maxima	Cucurbita pepo subsp. pepo|Cucurbita maxima|Cucurbita moschata	XP_022970889.1	XP_023534218.1|XP_022970889.1|XP_022947224.1	1	39.1	10.15	seed biotin-containing protein SBP65-like
1	3	370.212	-0.0027	-2.4	4050000	9.93	1	78.5	9.3	15	FTELSALSLK	2	2	9.93	1	370.212	1108.62	-0.0027	(K)	FTELSALSLK	(N)	Cucurbita maxima	Cucurbita pepo subsp. pepo|Cucurbita maxima|Cucurbita moschata	XP_022984210.1	XP_023552551.1|XP_022984210.1|XP_022922985.1	1	40.1	9.93	probable inactive receptor kinase At2g26730
2	2	593.812	0.0107	9	1420000	9.87	10.03	68.6	6.18	9	QGETVVPGGTGGK	2	4	9.87	10.03	593.812	1186.61	0.0107	(K)	QGETVVPGGTGGK	(S)	Cucurbita maxima	Cucurbita pepo subsp. pepo|Cucurbita maxima|Cucurbita moschata	XP_022978321.1	XP_023544726.1|XP_023543342.1|XP_022978323.1|XP_022978321.1|XP_022949998.1|XP_022949996.1|XP_022949995.1	1	41.1	9.87	carrot ABA-induced in somatic embryos 3
1	2	426.24	-0.0052	-6.1	1180000	9.83	2.78	82.9	10.53	10	IVGFYPR	1	1	9.83	2.78	426.24	851.477	-0.0052	(R)	IVGFYPR	(L)	Cucurbita maxima	Cucurbita pepo subsp. pepo|Cucurbita maxima|Cucurbita moschata	XP_022968183.1	XP_023541990.1|XP_023539804.1|XP_022968184.1|XP_022968183.1|XP_022993277.1|XP_022957563.1|XP_022945194.1	1	42.1	9.83	glycosyltransferase family protein 64 protein C5-like
1	4	548.037	0.0145	6.6	1190000	9.62	5.17	60	16.52	11	LVAGSFQGYKGHVDGKPSDAR	1	1	9.62	5.17	548.037	2189.11	0.0145	(R)	LVAGSFQGYKGHVDGKPSDAR	(F)	Cucurbita maxima	Cucurbita maxima	XP_022981228.1	XP_022981228.1	1	43.1	9.62	uncharacterized protein LOC111480428
1	2	1030.05	-0.0014	-0.7	2580000	9.61	2.42	44	29.1	12	LYETHKDLPNARVIFDK	1	1	9.61	2.42	1030.05	2059.1	-0.0014	(K)	LYETHKDLPNARVIFDK	(A)	Cucurbita maxima	Cucurbita pepo subsp. pepo|Cucurbita maxima|Cucurbita moschata	XP_022977433.1	XP_023543705.1|XP_022977433.1|XP_022950160.1	1	44.1	9.61	pre-mRNA-splicing factor SYF1
1	3	458.574	0.0064	4.7	1880000	9.47	3.34	57.2	15.48	13	SCIHYVTPLQR	2	3	9.58	3.02	458.573	1373.7	0.0048	(R)	SCIHYVTPLQR	(I)	Cucurbita maxima	Cucurbita pepo subsp. pepo|Cucurbita maxima|Cucurbita moschata	XP_022965891.1	XP_023537184.1|XP_023522187.1|XP_022965891.1|XP_022937593.1|XP_022937592.1|XP_022937591.1	1	45.1	9.58	uncharacterized protein LOC111465640
1	3	442.558	0.0042	3.1	3960000	9.51	4.09	78.5	1.23	6	VGDPKFGEFMAK	1	1	9.51	4.09	442.558	1325.66	0.0042	(R)	VGDPKFGEFMAK	(T)	Cucurbita moschata	Cucurbita moschata	XP_022950091.1	XP_022950091.1	1	46.1	9.51	uncharacterized protein LOC111453278
1	3	640.996	-0.0189	-9.8	12700000	9.51	4.65	54.6	17	16	EIAKYCLSMADKPAVPK	1	1	9.51	4.65	640.996	1920.99	-0.0189	(R)	EIAKYCLSMADKPAVPK	(E)	Cucurbita maxima	Cucurbita pepo subsp. pepo|Cucurbita maxima	XP_023006708.1	XP_023535029.1|XP_023535021.1|XP_023535012.1|XP_023006708.1	1	47.1	9.51	uncharacterized protein LOC111499332
1	3	509.957	0.007	4.6	3720000	9.42	0.25	81.3	11.72	13	ISDAIAAAPNLSTKR	1	1	9.42	0.25	509.957	1527.85	0.007	(K)	ISDAIAAAPNLSTKR	(F)	Cucurbita moschata	Cucurbita moschata	XP_022946598.1	XP_022946598.1	1	48.1	9.42	pectinesterase-like
1	3	459.584	-0.0104	-7.5	318000	9.39	6.04	71.7	21.03	10	MATPALSFQVRR	1	1	9.39	6.04	459.584	1376.75	-0.0104	(-)	MATPALSFQVRR	(C)	Cucurbita maxima	Cucurbita maxima|Cucurbita moschata	XP_023007354.1	XP_023007354.1|XP_022948214.1	1	49.1	9.39	benzyl alcohol O-benzoyltransferase-like
1	4	441.477	-0.0053	-3	427000	9.37	4.37	73.6	12.9	8	LDVMHRHHPHVQEK	1	1	9.37	4.37	441.477	1762.89	-0.0053	(K)	LDVMHRHHPHVQEK	(L)	Cucurbita moschata	Cucurbita pepo subsp. pepo|Cucurbita moschata	XP_022943788.1	XP_023512274.1|XP_022943790.1|XP_022943789.1|XP_022943788.1	1	50.1	9.37	aspartic proteinase NANA, chloroplast-like isoform X1
1	4	409.978	0.0075	4.6	571000	9.34	3.16	69.1	14.88	9	RGMELAVSLSLFASR	1	1	9.34	3.16	409.978	1636.88	0.0075	(R)	RGMELAVSLSLFASR	(V)	Cucurbita maxima	Cucurbita maxima|Cucurbita moschata	XP_022986435.1	XP_022986435.1|XP_022944491.1|XP_022944490.1	1	51.1	9.34	serine/threonine-protein kinase SMG1-like
1	3	497.279	-0.0021	-1.4	940000	9.1	1.89	65.4	24.2	10	NNNIFTRKLANGK	1	1	9.1	1.89	497.279	1489.82	-0.0021	(R)	NNNIFTRKLANGK	(A)	Cucurbita pepo subsp. pepo	Cucurbita pepo subsp. pepo	XP_023526201.1	XP_023526203.1|XP_023526201.1	1	52.1	9.1	MLP-like protein 34
1	3	488.931	-0.0139	-9.5	10600000	6.85	3.45	65.4	12.43	10	YFRRFMYIIR	2	2	8.95	1.51	488.932	1464.79	-0.0108	(K)	YFRRFMYIIR	(S)	Cucurbita maxima	Cucurbita pepo subsp. pepo|Cucurbita maxima	XP_022978895.1	XP_023517622.1|XP_023544118.1|XP_023544117.1|XP_023003854.1|XP_022978895.1	1	53.1	8.95	transcription-associated protein 1-like
1	3	472.262	-0.0073	-5.2	970000	8.87	2.6	58.5	10.13	15	SSLFSIRRSSFK	1	1	8.87	2.6	472.262	1414.78	-0.0073	(R)	SSLFSIRRSSFK	(I)	Cucurbita maxima	Cucurbita maxima	XP_023004202.1	XP_023004203.1|XP_023004202.1	1	54.1	8.87	pentatricopeptide repeat-containing protein At2g03880, mitochondrial-like isoform X1
1	3	626.653	-0.0056	-3	4290000	8.71	0.93	71.5	12.27	47	TNTNPPEPPKDYIHVR	1	1	8.71	0.93	626.653	1877.95	-0.0056	(K)	TNTNPPEPPKDYIHVR	(A)	Cucurbita maxima	Cucurbita pepo subsp. pepo|Cucurbita maxima|Cucurbita moschata	XP_023004765.1	XP_023513512.1|XP_023004765.1|XP_022959659.1	1	55.1	8.71	transcription factor bHLH62-like
1	2	636.792	0.0033	2.6	1730000	8.51	2.92	60	15.68	17	ELEEATDYFR	1	1	8.51	2.92	636.792	1272.57	0.0033	(K)	ELEEATDYFR	(A)	Cucurbita maxima	Cucurbita pepo subsp. pepo|Cucurbita maxima|Cucurbita moschata	XP_022987716.1	XP_023515791.1|XP_022987716.1|XP_022961051.1	1	56.1	8.51	probable receptor-like protein kinase At5g20050
1	4	604.821	0.0039	1.6	614000	8.25	1.92	60.3	15.12	9	LKPGEEDRALSEVISEAFNRR	1	1	8.25	1.92	604.821	2416.26	0.0039	(K)	LKPGEEDRALSEVISEAFNRR	(K)	Cucurbita maxima	Cucurbita maxima	XP_022971843.1	XP_022971843.1	1	57.1	8.25	low-temperature-induced 65 kDa protein-like
1	3	504.951	-0.0111	-7.4	1270000	8.19	2.85	82.1	17.87	13	LSSEKTTVNHLKR	1	1	8.19	2.85	504.951	1512.85	-0.0111	(K)	LSSEKTTVNHLKR	(D)	Cucurbita moschata	Cucurbita pepo subsp. pepo|Cucurbita moschata	XP_022922990.1	XP_023553036.1|XP_023553035.1|XP_023553034.1|XP_022922992.1|XP_022922991.1|XP_022922990.1	1	58.1	8.19	WD repeat-containing protein 91 homolog isoform X1
1	3	572.331	0.0072	4.2	2570000	8.19	4.12	65.7	29.37	12	RVVSSELLQSDLLQK	2	2	8.19	4.12	572.331	1714.97	0.0072	(K)	RVVSSELLQSDLLQK	(H)	Cucurbita maxima	Cucurbita pepo subsp. pepo|Cucurbita maxima|Cucurbita moschata	XP_022975935.1	XP_023535181.1|XP_022975935.1|XP_022936380.1	1	59.1	8.19	protein FAM91A1-like
1	3	527.912	0.0032	2	2530000	7.98	3.78	82.1	15.57	15	NLKTSRECDDSEK	1	1	7.98	3.78	527.912	1581.72	0.0032	(R)	NLKTSRECDDSEK	(D)	Cucurbita moschata	Cucurbita moschata	XP_022952890.1	XP_022952890.1	1	60.1	7.98	probable protein phosphatase 2C 52
1	2	443.207	0.0004	0.4	2740000	7.78	3.11	58.3	2.52	7	SDAPPGEGR	1	1	7.78	3.11	443.207	885.406	0.0004	(K)	SDAPPGEGR	(K)	Cucurbita pepo subsp. pepo	Cucurbita pepo subsp. pepo	XP_023516977.1	XP_023516977.1	1	61.1	7.78	zinc finger CCCH domain-containing protein 64 isoform X2
1	3	484.594	0.0092	6.4	1160000	6.65	3.61	67.5	17.73	10	FFRFFFTNGLR	2	2	7.67	3.2	484.594	1451.76	0.0101	(R)	FFRFFFTNGLR	(F)	Cucurbita maxima	Cucurbita maxima	XP_022989859.1	XP_022989859.1	1	62.1	7.67	multicopper oxidase LPR2-like
1	2	501.741	0.0004	0.4	965000	7.58	7.9	50.9	6.22	10	DKPEGEAEK	1	1	7.58	7.9	501.741	1002.47	0.0004	(K)	DKPEGEAEK	(S)	Cucurbita pepo subsp. pepo	Cucurbita pepo subsp. pepo	XP_023519267.1	XP_023519267.1	1	63.1	7.58	ran-binding protein 1 homolog a-like
1	3	636.327	0.0039	2	7730000	7.34	2.12	76.6	15.53	12	NLLWSTNVSSSATNVSAR	1	1	7.34	2.12	636.327	1906.96	0.0039	(R)	NLLWSTNVSSSATNVSAR	(I)	Cucurbita moschata	Cucurbita moschata|Cucurbita pepo subsp. pepo|Cucurbita maxima	XP_022927514.1	XP_022927516.1|XP_022927515.1|XP_022927514.1|XP_023523710.1|XP_023523709.1|XP_022998262.1|XP_022998261.1|XP_022998260.1|XP_022948644.1	1	64.1	7.34	G-type lectin S-receptor-like serine/threonine-protein kinase At1g11300 isoform X1
1	3	895.153	-0.0111	-4.1	932000	7.33	3.43	56.6	31.45	10	LLDTAGLVDSNLTRTPMEARLQLR	1	1	7.33	3.43	895.153	2683.46	-0.0111	(K)	LLDTAGLVDSNLTRTPMEARLQLR	(K)	Cucurbita moschata	Cucurbita moschata	XP_022946890.1	XP_022946890.1	1	65.1	7.33	uncharacterized protein LOC111450831
1	2	456.212	-0.006	-6.6	11800000	7.27	7.27	52.2	3.37	8	YGGTNGGTGK	1	1	7.27	7.27	456.212	911.422	-0.006	(R)	YGGTNGGTGK	(I)	Cucurbita maxima	Cucurbita pepo subsp. pepo|Cucurbita maxima|Cucurbita moschata	XP_023004041.1	XP_023517419.1|XP_023004045.1|XP_023004044.1|XP_023004043.1|XP_023004042.1|XP_023004041.1|XP_022926482.1	1	66.1	7.27	putative E3 ubiquitin-protein ligase RING1a isoform X1
1	3	640.998	0.0015	0.8	7410000	7.21	4.57	30.9	17.17	12	AGIMVPSKYMNDVPSRR	1	1	7.21	4.57	640.998	1920.98	0.0015	(R)	AGIMVPSKYMNDVPSRR	(L)	Cucurbita maxima	Cucurbita pepo subsp. pepo|Cucurbita maxima|Cucurbita moschata	XP_022986277.1	XP_023513165.1|XP_023513164.1|XP_022986277.1|XP_022944082.1	1	67.1	7.21	QWRF motif-containing protein 3
1	4	693.093	-0.0117	-4.2	3060000	7.13	4.74	44.3	20.1	10	IYSSLWNADDWATRGGLVKTDWSK	1	1	7.13	4.74	693.093	2769.36	-0.0117	(R)	IYSSLWNADDWATRGGLVKTDWSK	(A)	Cucurbita maxima	Cucurbita pepo subsp. pepo|Cucurbita maxima|Cucurbita moschata	XP_023005059.1	XP_023515165.1|XP_023005059.1|XP_022960356.1	1	68.1	7.13	xyloglucan endotransglucosylase/hydrolase 2
2	3	516.256	0.0052	3.4	804000	7.04	2.01	71.3	2.5	7	SQSPSQQGWLVDSK	1	2	7.04	2.01	516.256	1546.75	0.0052	(K)	SQSPSQQGWLVDSK	(H)	Cucurbita maxima	Cucurbita maxima|Cucurbita moschata	XP_023003788.1	XP_023003788.1|XP_022926830.1	1	69.1	7.04	two-pore potassium channel 3-like
1	2	452.239	0.007	7.8	304000	7.03	-3.8	50.5	2.68	8	LTGGGGGGTAR	1	1	7.03	-3.8	452.239	903.464	0.007	(R)	LTGGGGGGTAR	(A)	Cucurbita maxima	Cucurbita maxima	XP_023006053.1	XP_023006053.1	1	70.1	7.03	uncharacterized protein LOC111498924
1	3	508.938	0.0113	7.4	301000	6.84	6.84	62.6	12.42	9	YTPNWKEVMKTK	1	1	6.84	6.84	508.938	1524.79	0.0113	(R)	YTPNWKEVMKTK	(R)	Cucurbita maxima	Cucurbita maxima	XP_022970860.1	XP_022970860.1	1	71.1	6.84	transcription factor JUNGBRUNNEN 1-like
1	3	904.826	0.0059	2.2	914000	6.71	8.15	55.9	26.33	9	LKDADVIRTLQWIATQENLEIDK	1	1	6.71	8.15	904.826	2712.46	0.0059	(K)	LKDADVIRTLQWIATQENLEIDK	(D)	Cucurbita pepo subsp. pepo	Cucurbita pepo subsp. pepo	XP_023517955.1	XP_023517957.1|XP_023517956.1|XP_023517955.1	1	72.1	6.71	protein STICHEL-like 3 isoform X1
1	2	543.769	0.0006	0.5	8970000	6.67	-2.26	39	8.52	8	HMLNERMR	1	1	6.67	-2.26	543.769	1086.53	0.0006	(R)	HMLNERMR	(R)	Cucurbita moschata	Cucurbita moschata	XP_022930317.1	XP_022930317.1	1	73.1	6.67	transcription factor bHLH92-like
1	2	557.84	0.0025	2.3	542000	6.67	6.67	86.7	17.78	15	VVRSQGSLLR	1	1	6.67	6.67	557.84	1114.67	0.0025	(R)	VVRSQGSLLR	(N)	Cucurbita maxima	Cucurbita maxima	XP_022998915.1	XP_022998941.1|XP_022998932.1|XP_022998924.1|XP_022998915.1	1	74.1	6.67	uncharacterized protein LOC111493434 isoform X1
1	3	1077.19	-0.0194	-6	2080000	6.45	2.68	45.7	36.47	22	IDEISLEFSEDEEEINPVDLNVLPITEK	1	1	6.45	2.68	1077.19	3229.59	-0.0194	(R)	IDEISLEFSEDEEEINPVDLNVLPITEK	(R)	Cucurbita pepo subsp. pepo	Cucurbita pepo subsp. pepo	XP_023516378.1	XP_023516378.1	1	75.1	6.45	CRM-domain containing factor CFM3, chloroplastic/mitochondrial
1	2	442.216	-0.0021	-2.4	442000	6.43	6.43	64.1	2.08	7	TGQYTSRA	1	1	6.43	6.43	442.216	883.427	-0.0021	(R)	TGQYTSRA	(-)	Cucurbita maxima	Cucurbita pepo subsp. pepo|Cucurbita maxima|Cucurbita moschata	XP_022971212.1	XP_023538922.1|XP_022971212.1|XP_022938045.1	1	76.1	6.43	uncharacterized protein LOC111470003
1	3	425.568	0.0054	4.2	1430000	6.16	2.69	60.6	6.57	9	LWSAGKETNIR	1	1	6.16	2.69	425.568	1274.69	0.0054	(K)	LWSAGKETNIR	(L)	Cucurbita maxima	Cucurbita pepo subsp. pepo|Cucurbita maxima|Cucurbita moschata	XP_023001425.1	XP_023519183.1|XP_023001425.1|XP_022927195.1	1	77.1	6.16	uncharacterized protein LOC111495561
1	4	604.097	0.0043	1.8	27100000	5.17	1.92	57.5	31.38	17	LLVIFLGLHYNLLSSNAVPSSR	2	2	6.14	0.57	604.097	2413.36	0.0058	(R)	LLVIFLGLHYNLLSSNAVPSSR	(S)	Cucurbita maxima	Cucurbita pepo subsp. pepo|Cucurbita maxima	XP_023001352.1	XP_023519471.1|XP_023001352.1	1	78.1	6.14	uncharacterized protein LOC111495510
1	3	830.083	-0.0175	-7	2210000	6.13	1.67	60.6	24.6	13	LVVKYLYQCYWPCDIQIAR	1	1	6.13	1.67	830.083	2488.25	-0.0175	(R)	LVVKYLYQCYWPCDIQIAR	(E)	Cucurbita pepo subsp. pepo	Cucurbita pepo subsp. pepo	XP_023550415.1	XP_023550416.1|XP_023550415.1	1	79.1	6.13	phospholipid-transporting ATPase 1-like isoform X1
1	4	581.784	0.0087	3.7	5070000	5.77	5.77	51.1	18.78	13	KPPVAPSSTDHDYYQGPATHR	2	2	5.99	3.8	581.782	2324.11	0.0016	(R)	KPPVAPSSTDHDYYQGPATHR	(S)	Cucurbita maxima	Cucurbita maxima	XP_022973743.1	XP_022973745.1|XP_022973744.1|XP_022973743.1	1	80.1	5.99	chromatin structure-remodeling complex protein SYD-like isoform X1
1	4	545.048	-0.0042	-1.9	2640000	5.7	2.78	56.6	17.62	34	MQSEIKDLETKITTLVAEK	1	1	5.7	2.78	545.048	2177.17	-0.0042	(R)	MQSEIKDLETKITTLVAEK	(E)	Cucurbita maxima	Cucurbita pepo subsp. pepo|Cucurbita maxima	XP_022985463.1	XP_023553225.1|XP_022985463.1	1	81.1	5.7	structural maintenance of chromosomes protein 2-1-like
1	5	1109.15	0.0016	0.3	2180000	5.63	5.63	47.5	34.5	17	LEQIMELLKSGTLEVPETQDSAIEAENVDDSLGSQATNEVRNNELLEIEK	1	1	5.63	5.63	1109.15	5541.73	0.0016	(R)	LEQIMELLKSGTLEVPETQDSAIEAENVDDSLGSQATNEVRNNELLEIEK	(R)	Cucurbita maxima	Cucurbita maxima	XP_022995912.1	XP_022995912.1	1	82.1	5.63	splicing factor 1-like isoform X2
1	6	791.583	-0.0062	-1.3	1120000	5.6	-0.26	64.9	37.23	1	AANVSSGSSPSAPPPEKIPENVGAAAAPVAAAKPASVVVASTHPASEGGKR	1	1	5.6	-0.26	791.583	4744.47	-0.0062	(R)	AANVSSGSSPSAPPPEKIPENVGAAAAPVAAAKPASVVVASTHPASEGGKR	(I)	Cucurbita pepo subsp. pepo	Cucurbita pepo subsp. pepo	XP_023524681.1	XP_023524682.1|XP_023524681.1	1	83.1	5.6	dihydrolipoyllysine-residue acetyltransferase component 5 of pyruvate dehydrogenase complex, chloroplastic-like isoform X1
1	4	776.345	0.0205	6.6	2850000	5.56	1.64	33.2	27.83	12	VPWAFPSEEDEATLCYCDNENRLMR	1	1	5.56	1.64	776.345	3102.34	0.0205	(K)	VPWAFPSEEDEATLCYCDNENRLMR	(A)	Cucurbita moschata	Cucurbita pepo subsp. pepo|Cucurbita moschata	XP_022962219.1	XP_023546949.1|XP_022962219.1	1	84.1	5.56	transcription factor bHLH30-like
1	4	429.252	-0.0147	-8.6	1940000	5.55	0.51	42.3	14.77	49	VVKGTGKAINYLTPPR	1	1	5.55	0.51	429.252	1714	-0.0147	(R)	VVKGTGKAINYLTPPR	(I)	Cucurbita maxima	Cucurbita pepo subsp. pepo|Cucurbita maxima|Cucurbita moschata	XP_022965406.1	XP_023529434.1|XP_022965406.1|XP_022933701.1	1	85.1	5.55	probable chlorophyll(ide) b reductase NYC1, chloroplastic
1	4	780.153	0.0248	7.9	2760000	5.15	1.78	45.1	43.25	14	NPIQEYQVAHIPGALFFDIDGVSDRTSK	1	1	5.15	1.78	780.153	3117.56	0.0248	(R)	NPIQEYQVAHIPGALFFDIDGVSDRTSK	(L)	Cucurbita maxima	Cucurbita pepo subsp. pepo|Cucurbita maxima	XP_022984385.1	XP_023552851.1|XP_023552850.1|XP_022984386.1|XP_022984385.1	1	86.1	5.15	thiosulfate/3-mercaptopyruvate sulfurtransferase 1, mitochondrial-like
1	5	1109.15	0.0412	7.4	2180000	5.01	5.01	50.4	34.5	17	LEGGTLHVHGNVKDSEEELWTQHLLHSITEIAKSEGHCWDVSVEHIER	1	1	5.01	5.01	1109.15	5541.69	0.0412	(R)	LEGGTLHVHGNVKDSEEELWTQHLLHSITEIAKSEGHCWDVSVEHIER	(V)	Cucurbita maxima	Cucurbita maxima	XP_023002927.1	XP_023002927.1	1	87.1	5.01	tRNA wybutosine-synthesizing protein 2/3/4
1	7	1108.53	-0.0382	-4.9	4190000	5	2.9	55.4	35.37	16	VTGDDGYTLSIQCDVVVVGSGCGGGVAAAFLASSGQKVVVLEKGNYFTASDYSSLEGPSLNQLYEAGGIFTSNDGK	1	1	5	2.9	1108.53	7753.71	-0.0382	(R)	VTGDDGYTLSIQCDVVVVGSGCGGGVAAAFLASSGQKVVVLEKGNYFTASDYSSLEGPSLNQLYEAGGIFTSNDGK	(M)	Cucurbita maxima	Cucurbita maxima	XP_022979358.1	XP_022979358.1	1	88.1	5	long-chain-alcohol oxidase FAO1-like
1	4	475.264	-0.0022	-1.2	802000	4.94	2.75	44.4	21.98	13	LVHMKRSGMIVTDVSPK	1	1	4.94	2.75	475.264	1898.04	-0.0022	(K)	LVHMKRSGMIVTDVSPK	(S)	Cucurbita maxima	Cucurbita pepo subsp. pepo|Cucurbita maxima	XP_022979476.1	XP_023526068.1|XP_022979476.1	1	89.1	4.94	SAC3 family protein B
1	4	728.137	0.0231	7.9	1910000	4.84	1.69	50.1	35.25	11	LLKDVFWANGDGLPSELSDKFSTTLR	1	1	4.84	1.69	728.137	2909.5	0.0231	(K)	LLKDVFWANGDGLPSELSDKFSTTLR	(C)	Cucurbita maxima	Cucurbita maxima	XP_023002200.1	XP_023002201.1|XP_023002200.1	1	90.1	4.84	uncharacterized protein LOC111496130 isoform X1
1	4	577.295	-0.0108	-4.7	4870000	4.75	1.77	33.3	19.65	15	GLVPDAYTYSFLLEAAYKER	1	1	4.75	1.77	577.295	2306.17	-0.0108	(K)	GLVPDAYTYSFLLEAAYKER	(G)	Cucurbita maxima	Cucurbita pepo subsp. pepo|Cucurbita maxima|Cucurbita moschata	XP_022976751.1	XP_023535030.1|XP_023535028.1|XP_023535027.1|XP_022976752.1|XP_022976751.1|XP_022936468.1	1	91.1	4.75	pentatricopeptide repeat-containing protein At1g79080, chloroplastic-like
1	2	624.822	-0.0108	-8.7	286000	4.74	6.11	34.8	16.48	9	IEAFEGALAEAK	1	1	4.74	6.11	624.822	1248.65	-0.0108	(K)	IEAFEGALAEAK	(K)	Cucurbita pepo subsp. pepo	Cucurbita pepo subsp. pepo	XP_023553029.1	XP_023553030.1|XP_023553029.1	1	92.1	4.74	phosphatidylinositol/phosphatidylcholine transfer protein SFH11 isoform X1
1	4	534.518	0.0105	4.9	2830000	4.7	3.29	46.1	13.9	10	AMGGAEKVEIQHGNHSLSNR	1	1	4.7	3.29	534.518	2135.04	0.0105	(K)	AMGGAEKVEIQHGNHSLSNR	(V)	Cucurbita maxima	Cucurbita pepo subsp. pepo|Cucurbita maxima|Cucurbita moschata	XP_022973669.1	XP_023540798.1|XP_022973669.1|XP_022936878.1	1	93.1	4.7	UPF0613 protein PB24D3.06c
1	4	664.621	0.0197	7.4	4790000	4.66	2.12	47.1	26.5	12	MKMSILLGVAQMNLGIILSYFNAK	1	1	4.66	2.12	664.621	2655.44	0.0197	(K)	MKMSILLGVAQMNLGIILSYFNAK	(F)	Cucurbita maxima	Cucurbita pepo subsp. pepo|Cucurbita maxima|Cucurbita moschata	XP_023002237.1	XP_023537097.1|XP_023002237.1|XP_022951118.1	1	94.1	4.66	V-type proton ATPase subunit a2-like
1	5	949.696	-0.0279	-5.9	4480000	4.6	2.18	57.5	37.23	15	WISWLIPSFVIANIVMFIITMYVNNCPKNSVTCIARFLGR	1	1	4.6	2.18	949.696	4744.48	-0.0279	(K)	WISWLIPSFVIANIVMFIITMYVNNCPKNSVTCIARFLGR	(F)	Cucurbita maxima	Cucurbita pepo subsp. pepo|Cucurbita maxima	XP_022982610.1	XP_023528623.1|XP_023528622.1|XP_023528621.1|XP_023528620.1|XP_023528619.1|XP_022982611.1|XP_022982610.1	1	95.1	4.6	RHOMBOID-like protein 1
1	5	892.061	0.0104	2.3	2050000	4.33	-1.13	45.1	39.08	14	LSNASINGGYSNAITLNRRLSLGIQQLGSNSTNSANVGTSFMK	1	1	4.33	-1.13	892.061	4456.26	0.0104	(R)	LSNASINGGYSNAITLNRRLSLGIQQLGSNSTNSANVGTSFMK	(E)	Cucurbita maxima	Cucurbita maxima|Cucurbita moschata	XP_023002839.1	XP_023002840.1|XP_023002839.1|XP_022951089.1|XP_022951088.1	1	96.1	4.33	65-kDa microtubule-associated protein 8-like isoform X1
1	4	371.198	-0.0048	-3.2	2030000	4.3	4.3	41.8	1.3	7	GIDPNTHKPFIDK	1	1	4.3	4.3	371.198	1481.77	-0.0048	(K)	GIDPNTHKPFIDK	(E)	Cucurbita moschata	Cucurbita moschata	XP_022937953.1	XP_022937953.1	1	97.1	4.3	transcription factor MYB86-like

## Sheet: Rapeseed oil
num_Spectra	z	parent_m_over_z	delta_parent_mass	delta_ppm	totalIntensity	score	deltaForwardReverseScore	percent_scored_peak_intensity	retentionTimeMin	chromatographicPeakWidthSec	Sequence	numColumnsSequenceObserved	numSpectraSequenceObserved	bestScore	bestDeltaForwardReverseScore	best_parent_m_over_z	best_matched_parent_mass	best_delta_parent_mass	previous_aa	sequence	next_aa	species	speciesMulti	accession_number	accession_numbers	peptide_num	protein_group_num	protein_score	entry_name
1	3	642.307	0.0176	9.1	852000	10.78	10.87	74.1	5.03	8	AHEAHDTSLTTETTEPGK	1	1	10.78	10.87	642.307	1924.89	0.0176	(K)	AHEAHDTSLTTETTEPGK	(T)	Brassica napus	Brassica napus	ACG69506.1	ACG69506.1	1	1.1	43.04	oleosin S2-2
1	2	762.37	0.0101	6.6	1460000	9.39	5.86	79.4	13.55	10	GTSDTVPEQLDYAK	2	2	10	7.89	762.369	1523.72	0.0073	(R)	GTSDTVPEQLDYAK	(R)	Brassica napus	Brassica napus	ACG69506.1	CDY20040.1|ACG69506.1	2	1.1	43.04	oleosin S2-2
1	2	451.239	0.009	9.9	548000	12.4	5.97	78.5	4.77	9	VQVDPTDK	1	1	12.4	5.97	451.239	901.462	0.009	(R)	VQVDPTDK	(R)	Brassica napus	UNREADABLE|Brassica napus	ACG69506.1	sp|C3S7F1.1|OLES2_BRANA|XP_013725019.1|CDY20040.1|ACG69506.1	3	1.1	43.04	oleosin S2-2
2	2	529.29	0.0085	8	1200000	9.86	5.1	62.2	3.72	9	VQVDPTDKR	1	2	9.86	5.1	529.29	1057.56	0.0085	(R)	VQVDPTDKR	(I)	Brassica napus	UNREADABLE|Brassica napus	ACG69506.1	sp|C3S7F1.1|OLES2_BRANA|XP_013725019.1|CDY20040.1|ACG69506.1	4	1.1	43.04	oleosin S2-2
2	2	495.744	0.0073	7.3	1040000	15.72	9.47	81.8	3.77	7	DAGQTIEEK	1	2	15.72	9.47	495.744	990.474	0.0073	(K)	DAGQTIEEK	(A)	Brassica napus	Brassica napus	ACG69504.1	XP_013735634.1|ACG69504.1	1	2.1	25.09	oleosin S1-1
1	2	531.249	0.0079	7.4	722000	9.37	5.78	69.6	9.93	10	MPDELEEAK	1	1	9.37	5.78	531.249	1061.48	0.0079	(R)	MPDELEEAK	(Q)	Brassica napus	Brassica napus	ACG69504.1	XP_013735634.1|ACG69504.1	2	2.1	25.09	oleosin S1-1
1	2	483.255	0.0089	9.2	981000	15.31	9.45	84	9.02	9	VFDQEISK	1	1	15.31	9.45	483.255	965.494	0.0089	(R)	VFDQEISK	(G)	Brassica napus	UNREADABLE|Brassica napus	CAA40980.1	sp|P33522.1|CRU4_BRANA|CDY18193.1|CAA40980.1	1	3.1	15.31	cruciferin cru4 subunit, partial
2	2	537.243	0.0099	9.2	3140000	14.45	13.49	86.1	4.98	9	QAMQPGGGSGPS	2	3	14.45	13.49	537.243	1073.47	0.0099	(-)	QAMQPGGGSGPS	(-)	Brassica napus	UNREADABLE	pir||S70337	pir||S70337	1	4.1	14.45	napin small chain S2 - Swedish turnip (fragment)
1	2	538.777	0.0099	9.2	1530000	13.62	4.9	79.8	13.7	10	EGIFPVSGDR	2	2	13.62	4.9	538.777	1076.54	0.0099	(K)	EGIFPVSGDR	(N)	Brassica napus	Brassica napus	CDY31462.1	XP_013682113.1|CDY31462.1	1	5.1	13.62	BnaC03g63620D
3	2	607.805	0.0106	8.7	6970000	12.94	12.94	66.6	5.38	7	EFQQEQHLR	1	3	12.94	12.94	607.805	1214.59	0.0106	(R)	EFQQEQHLR	(A)	Brassica napus	Brassica napus|UNREADABLE|Brassica napus=rapeseed, Peptide, 31 aa	AAN86249.1	pdb|1SM7|A|XP_013705462.1|XP_013738180.1|CDY46659.1|AAN86249.1|AAB21101.1	1	6.1	12.94	recombinant Ib pronapin precursor, partial
2	2	584.277	0.0068	5.8	1890000	11.65	11.65	70.7	3.62	10	THENIDDPAR	2	3	11.65	11.65	584.277	1167.54	0.0068	(R)	THENIDDPAR	(A)	Brassica napus	UNREADABLE|Brassica napus	AAA32989.1	sp|P33525.1|CRU3_BRANA|XP_022554684.1|XP_013656366.1|XP_013734592.1|XP_013734582.1|XP_013696793.1|CDY14237.1|CDY35196.1|CDY38381.1|AAK07609.1|AAA32989.1|CAA44042.1|CAE85322.1|CAE85277.1	1	7.1	11.65	cruciferin precursor, partial
1	2	478.232	-0.0029	-3	736000	9.19	3.5	76.3	3.08	7	VTDAHQER	1	1	9.19	3.5	478.232	955.459	-0.0029	(K)	VTDAHQER	(V)	Brassica napus	Brassica napus	XP_013710827.1	XP_013710827.1	1	8.1	9.19	uncharacterized protein LOC106414789
1	2	508.772	-0.0049	-4.8	639000	8.11	2.75	73.1	7.62	9	VQGYDIPPK	1	1	8.11	2.75	508.772	1016.54	-0.0049	(K)	VQGYDIPPK	(R)	Brassica napus	Brassica napus	CDY13616.1	XP_013644848.1|XP_013644847.1|CDY13616.1|CDY46997.1|CDY46989.1|CDY50360.1	1	9.1	8.11	BnaA06g33070D
1	2	626.275	0.0082	6.6	3290000	7.77	2.52	30.7	17.18	12	EVEMVNCDQK	1	1	7.77	2.52	626.275	1251.53	0.0082	(K)	EVEMVNCDQK	(E)	Brassica napus	Brassica napus	XP_013703569.1	XP_013703569.1	1	10.1	7.77	myosin-10
1	2	426.756	0.007	8.2	10500000	7.14	0.42	52.5	12.02	17	FLAFVQK	1	1	7.14	0.42	426.756	852.498	0.007	(R)	FLAFVQK	(L)	Brassica napus	Brassica napus	CDY19387.1	XP_013641222.1|CDY19387.1	1	11.1	7.14	BnaC05g08960D
1	2	934.89	-0.0116	-6.2	3750000	5.75	5.75	50.2	20.15	10	MRSTGNYDGPVCHCSK	2	2	5.99	7.11	934.889	1868.78	-0.0133	(-)	MRSTGNYDGPVCHCSK	(S)	Brassica napus	Brassica napus	XP_013709124.1	XP_013709124.1	1	12.1	5.99	uncharacterized protein LOC106412769
1	2	863.388	-0.0171	-9.9	6850000	5.94	5.22	33.5	15	9	DTSTATDDMVATWRR	1	1	5.94	5.22	863.388	1725.79	-0.0171	(R)	DTSTATDDMVATWRR	(K)	Brassica napus	Brassica napus	XP_013649643.1	XP_022544918.1|XP_022544916.1|XP_013649646.1|XP_013649645.1|XP_013649644.1|XP_013649643.1	1	13.1	5.94	uncharacterized protein LOC106354284
1	2	490.785	0.0071	7.2	3170000	5.88	0.7	56.5	12.28	17	FLFPGGSKK	1	1	5.88	0.7	490.785	980.556	0.0071	(R)	FLFPGGSKK	(V)	Brassica napus	Brassica napus	XP_013659049.1	XP_013659049.1	1	14.1	5.88	uncharacterized protein LOC106363938
2	2	444.73	-0.0046	-5.1	1380000	5.12	0.6	52.4	5.4	7	LVWEGER	1	2	5.12	0.6	444.73	888.457	-0.0046	(R)	LVWEGER	(N)	Brassica napus	Brassica napus	CDY11708.1	XP_013699189.1|CDY11708.1	1	15.1	5.12	BnaC06g13160D
1	2	634.789	0.0063	5	5970000	4.97	1.73	35.3	10.95	12	IDEEGNAEYTK	1	1	4.97	1.73	634.789	1268.56	0.0063	(R)	IDEEGNAEYTK	(D)	Brassica napus	Brassica napus	CDY39463.1	XP_013674435.1|CDY39463.1	1	16.1	4.97	BnaC03g60730D
1	3	353.198	0.0057	5.4	978000	4.83	-2.57	52.8	3.72	8	RADVEAQLR	1	1	4.83	-2.57	353.198	1057.57	0.0057	(R)	RADVEAQLR	(R)	Brassica napus	Brassica napus	CDY20673.1	XP_022576328.1|XP_013696375.1|XP_013657718.1|XP_013640973.1|XP_013640972.1|XP_013750840.1|CDY20673.1|CDY31065.1	1	17.1	4.83	BnaC08g13850D
1	2	741.844	0.005	3.4	1150000	4.38	0.16	52.6	14.02	10	SSTTCMMHLSLSK	1	1	4.38	0.16	741.844	1482.67	0.005	(K)	SSTTCMMHLSLSK	(S)	Brassica napus	Brassica napus	XP_013749996.1	XP_022549158.1|XP_013749996.1	1	18.1	4.38	uncharacterized protein LOC106452427
1	2	634.323	0.0071	5.6	1070000	4.23	2.38	46	8.1	8	WSITVNYGAEK	1	1	4.23	2.38	634.323	1267.63	0.0071	(R)	WSITVNYGAEK	(L)	Brassica napus	Brassica napus	XP_013732016.1	XP_022554975.1|XP_013732016.1	1	19.1	4.23	F-box/kelch-repeat protein At4g38940-like
1	2	456.702	-0.0015	-1.7	1100000	4.13	4.13	65.8	5.12	9	EYRREC	1	1	4.13	4.13	456.702	912.399	-0.0015	(R)	EYRREC	(-)	Brassica napus	Brassica napus	CDY10267.1	XP_013696776.1|CDY10267.1	1	20.1	4.13	BnaC05g05100D

## Sheet: Sesame oil
num_Spectra	z	parent_m_over_z	delta_parent_mass	delta_ppm	totalIntensity	score	deltaForwardReverseScore	percent_scored_peak_intensity	retentionTimeMin	chromatographicPeakWidthSec	Sequence	numColumnsSequenceObserved	numSpectraSequenceObserved	bestScore	bestDeltaForwardReverseScore	best_parent_m_over_z	best_matched_parent_mass	best_delta_parent_mass	previous_aa	sequence	next_aa	species	speciesMulti	accession_number	accession_numbers	peptide_num	protein_group_num	protein_score	entry_name
4	2	1398.15	0.0167	6	57900000	25.55	25.55	97.2	29.35	12	AGEQGCEWVEFNTNDNALINTLSGR	2	6	25.55	25.55	1398.15	2795.27	0.0167	(R)	AGEQGCEWVEFNTNDNALINTLSGR	(T)	Sesamum indicum	Sesamum indicum	XP_020549903.1	XP_020549903.1|ABB60055.1	1	1.1	421.56	legumin B-like
7	2	1113.6	0.0148	6.6	109000000	20.25	18.55	87	26.83	21	ALMLPAYHNAPILAYVQQGR	2	13	21.47	18.34	742.74	2226.19	0.0207	(R)	ALMLPAYHNAPILAYVQQGR	(G)	Sesamum indicum	Sesamum indicum	XP_020549903.1	XP_020549903.1|ABB60055.1	2	1.1	421.56	legumin B-like
1	2	668.811	0.0088	6.6	518000	15.16	15.16	81.2	13.8	8	DNGLEETICSAK	1	1	15.16	15.16	668.811	1336.6	0.0088	(R)	DNGLEETICSAK	(L)	Sesamum indicum	Sesamum indicum	XP_020549903.1	XP_020549903.1|ABB60055.1	3	1.1	421.56	legumin B-like
1	2	902.897	0.0092	5.1	2230000	8.72	8.72	57.5	8.1	9	EEYGRQEEEPYYGR	2	2	12.07	12.07	902.898	1804.78	0.0116	(R)	EEYGRQEEEPYYGR	(R)	Sesamum indicum	Sesamum indicum	XP_020549903.1	XP_020549903.1|ABB60055.1	4	1.1	421.56	legumin B-like
6	4	1161.82	0.0212	4.6	1090000	15.95	12.93	89.2	34.4	1	EGDILAFPAGAAHWAYNNGDQELVIVVLQDNANNANQLDPNPR	2	10	17.65	13.07	1161.82	4644.25	0.0241	(R)	EGDILAFPAGAAHWAYNNGDQELVIVVLQDNANNANQLDPNPR	(S)	Sesamum indicum	Sesamum indicum	XP_020549903.1	XP_020549903.1|ABB60055.1	5	1.1	421.56	legumin B-like
1	2	806.965	0.016	9.9	95100000	15.94	12.43	94.6	22.15	14	EGQVVVVPQNFAVVK	2	2	15.94	12.43	806.965	1612.91	0.016	(R)	EGQVVVVPQNFAVVK	(R)	Sesamum indicum	Sesamum indicum	XP_020549903.1	XP_020549903.1|ABB60055.1	6	1.1	421.56	legumin B-like
1	2	885.013	0.0111	6.3	929000	15.23	13.2	87.8	19.1	9	EGQVVVVPQNFAVVKR	2	3	16.96	10.42	590.346	1769.01	0.017	(R)	EGQVVVVPQNFAVVKR	(A)	Sesamum indicum	Sesamum indicum	XP_020549903.1	XP_020549903.1|ABB60055.1	7	1.1	421.56	legumin B-like
1	2	479.756	0.0095	9.9	4600000	10.04	8.16	71.3	2.4	7	ENIDKPSR	1	1	10.04	8.16	479.756	958.495	0.0095	(R)	ENIDKPSR	(A)	Sesamum indicum	Sesamum indicum	XP_020549903.1	XP_020549903.1|ABB60055.1|XP_011080043.1	8	1.1	421.56	legumin B-like
4	3	764.778	0.0229	10	73700000	21.98	21.98	95.1	44.67	14	FSTINSLTLPILSFLQLSAAR	2	6	21.98	21.98	764.778	2292.3	0.0229	(R)	FSTINSLTLPILSFLQLSAAR	(G)	Sesamum indicum	Sesamum indicum	XP_020549903.1	XP_020549903.1|ABB60055.1	9	1.1	421.56	legumin B-like
5	3	691.992	0.0206	9.9	72400000	20.05	16.51	85.1	14.87	11	GESDMQIVNHNGQAVFDGR	2	12	20.85	18.44	691.992	2073.94	0.0198	(R)	GESDMQIVNHNGQAVFDGR	(V)	Sesamum indicum	Sesamum indicum	XP_020549903.1	XP_020549903.1	10	1.1	421.56	legumin B-like
1	2	1055.53	0.0152	7.2	38800000	24.41	22.74	96.6	34.67	12	GFDVQILSEVFGVDEQTAR	2	3	26.5	26.6	1055.53	2110.05	0.0119	(R)	GFDVQILSEVFGVDEQTAR	(S)	Sesamum indicum	Sesamum indicum	XP_020549903.1	XP_020549903.1	11	1.1	421.56	legumin B-like
1	2	794.436	0.0148	9.3	90700000	25.1	20.98	97.2	23.93	23	GLPADVIANAYQISR	2	2	25.1	20.98	794.436	1587.85	0.0148	(R)	GLPADVIANAYQISR	(E)	Sesamum indicum	Sesamum indicum	XP_020549903.1	XP_020549903.1|ABB60055.1	12	1.1	421.56	legumin B-like
1	3	734.387	0.0167	7.6	3030000	17.21	12.96	90.4	25.22	26	GLPADVIANAYQISREEAQR	1	1	17.21	12.96	734.387	2201.13	0.0167	(R)	GLPADVIANAYQISREEAQR	(L)	Sesamum indicum	Sesamum indicum	XP_020549903.1	XP_020549903.1|ABB60055.1	13	1.1	421.56	legumin B-like
7	3	952.083	0.0234	8.2	27100000	25.14	25.14	94.1	23.7	13	GMYGVMISGCPETFESSQQQFEEGR	2	12	28.5	28.5	952.082	2854.21	0.0192	(R)	GMYGVMISGCPETFESSQQQFEEGR	(G)	Sesamum indicum	Sesamum indicum	XP_020549903.1	XP_020549903.1|ABB60055.1	14	1.1	421.56	legumin B-like
1	2	752.37	0.0137	9.1	31400000	16.66	16.88	91.7	10.37	12	GQEQQEYAPQLGR	2	3	22.1	22.1	752.369	1503.72	0.0114	(R)	GQEQQEYAPQLGR	(K)	Sesamum indicum	Sesamum indicum	XP_020549903.1	XP_020549903.1|ABB60055.1	15	1.1	421.56	legumin B-like
1	2	595.302	0.0099	8.3	23200000	12.23	10.18	64.3	10.82	17	GQHQFGNVFR	2	2	18.25	14.95	595.302	1189.59	0.011	(R)	GQHQFGNVFR	(G)	Sesamum indicum	Sesamum indicum	XP_020549903.1	XP_020549903.1|ABB60055.1	16	1.1	421.56	legumin B-like
1	2	604.273	0.0114	9.4	7920000	9.56	9.56	66.6	4.22	6	GSTWQQGQCR	2	2	19.08	19.08	604.273	1207.53	0.0112	(R)	GSTWQQGQCR	(I)	Sesamum indicum	Sesamum indicum	XP_020549903.1	XP_020549903.1|ABB60055.1	17	1.1	421.56	legumin B-like
1	3	1025.8	0.0266	8.7	15800000	22.05	21.64	89.4	21.77	12	IQAEGGVSEFWDHNSDEFQCAGVSIHR	2	3	25.9	25.9	1025.8	3075.36	0.0226	(R)	IQAEGGVSEFWDHNSDEFQCAGVSIHR	(H)	Sesamum indicum	Sesamum indicum	XP_020549903.1	XP_020549903.1|ABB60055.1	18	1.1	421.56	legumin B-like
2	3	775.725	0.022	9.4	2210000	15.73	16.96	72.9	21.12	11	NGIMAPHWCVNAHSVIYVTR	1	2	15.73	16.96	775.725	2325.14	0.022	(R)	NGIMAPHWCVNAHSVIYVTR	(G)	Sesamum indicum	Sesamum indicum	XP_020549903.1	XP_020549903.1|ABB60055.1	19	1.1	421.56	legumin B-like
1	2	585.763	0.0114	9.8	7760000	15.66	8.45	92.2	6.57	11	QEEEPYYGR	1	1	15.66	8.45	585.763	1170.51	0.0114	(R)	QEEEPYYGR	(R)	Sesamum indicum	Sesamum indicum	XP_020549903.1	XP_020549903.1|ABB60055.1	20	1.1	421.56	legumin B-like
2	3	623.369	0.0175	9.4	2350000	15.23	8.51	91.3	20.02	10	VREGQVVVVPQNFAVVK	1	2	15.23	8.51	623.369	1868.08	0.0175	(R)	VREGQVVVVPQNFAVVK	(R)	Sesamum indicum	Sesamum indicum	XP_020549903.1	XP_020549903.1|ABB60055.1	21	1.1	421.56	legumin B-like
1	3	675.403	0.0172	8.5	1090000	14.63	14.36	79.5	17.28	9	VREGQVVVVPQNFAVVKR	1	1	14.63	14.36	675.403	2024.18	0.0172	(R)	VREGQVVVVPQNFAVVKR	(A)	Sesamum indicum	Sesamum indicum	XP_020549903.1	XP_020549903.1|ABB60055.1	22	1.1	421.56	legumin B-like
1	2	1075.55	0.016	7.4	53100000	22.36	19.13	96.2	31.6	15	AFDAELLSEAFNVPQETIR	2	3	23.94	21.31	1075.55	2150.08	0.014	(R)	AFDAELLSEAFNVPQETIR	(R)	Sesamum indicum	Sesamum indicum|UNREADABLE	AAD42944.1	NP_001291336.1|sp|Q9XHP0.1|11S2_SESIN|AAD42944.1	1	2.1	332.9	11S globulin precursor
1	3	769.404	0.0206	8.9	5550000	21.14	21.14	95.3	29.37	12	AFDAELLSEAFNVPQETIRR	1	1	21.14	21.14	769.404	2306.18	0.0206	(R)	AFDAELLSEAFNVPQETIRR	(M)	Sesamum indicum	UNREADABLE|Sesamum indicum	AAD42944.1	sp|Q9XHP0.1|11S2_SESIN|AAD42944.1	2	2.1	332.9	11S globulin precursor
1	2	670.331	0.0126	9.4	19500000	20.45	15.27	95	23.43	12	AGNNGFEWVAFK	2	2	21.72	21.72	670.331	1339.64	0.0115	(R)	AGNNGFEWVAFK	(T)	Sesamum indicum	Sesamum indicum|UNREADABLE	AAD42944.1	NP_001291336.1|sp|Q9XHP0.1|11S2_SESIN|AAD42944.1	3	2.1	332.9	11S globulin precursor
2	2	1208.15	0.0155	6.4	83300000	24.77	25.79	96.6	26.18	16	AMPLQVITNSYQISPNQAQALK	2	4	26.33	26.9	1208.14	2415.27	0.0122	(R)	AMPLQVITNSYQISPNQAQALK	(M)	Sesamum indicum	Sesamum indicum|UNREADABLE	AAD42944.1	NP_001291336.1|sp|Q9XHP0.1|11S2_SESIN|AAD42944.1	4	2.1	332.9	11S globulin precursor
3	2	1033.99	0.0138	6.7	32400000	19.75	19.75	77.2	12.92	10	GDAQVQVVDHNGQALMNDR	2	7	19.75	19.75	1033.99	2066.97	0.0138	(R)	GDAQVQVVDHNGQALMNDR	(V)	Sesamum indicum	Sesamum indicum|UNREADABLE	AAD42944.1	NP_001291336.1|sp|Q9XHP0.1|11S2_SESIN|AAD42944.1	5	2.1	332.9	11S globulin precursor
9	3	927.802	0.0254	9.1	131000000	20.91	20.15	94.7	27.02	12	GNLYSNALVSPDWSMTGHTIVYVTR	2	14	20.91	20.15	927.802	2781.37	0.0254	(K)	GNLYSNALVSPDWSMTGHTIVYVTR	(G)	Sesamum indicum	Sesamum indicum|UNREADABLE	AAD42944.1	NP_001291336.1|sp|Q9XHP0.1|11S2_SESIN|AAD42944.1	6	2.1	332.9	11S globulin precursor
3	2	1108.56	0.0156	7.1	22000000	16.8	16.33	87.7	23.68	12	GQGLISIMVPGCAETYQVHR	2	6	16.8	16.33	1108.56	2216.1	0.0156	(R)	GQGLISIMVPGCAETYQVHR	(S)	Sesamum indicum	Sesamum indicum|UNREADABLE	AAD42944.1	NP_001291336.1|sp|Q9XHP0.1|11S2_SESIN|AAD42944.1	7	2.1	332.9	11S globulin precursor
1	2	810.886	0.0145	9	47800000	21.52	17.21	92	15.43	12	IQSEGGTTELWDER	2	2	22.08	18.96	810.885	1620.75	0.0127	(R)	IQSEGGTTELWDER	(Q)	Sesamum indicum	Sesamum indicum|UNREADABLE	AAD42944.1	NP_001291336.1|sp|Q9XHP0.1|11S2_SESIN|AAD42944.1	8	2.1	332.9	11S globulin precursor
1	3	1047.17	0.0238	7.6	4340000	23.47	18.05	93.7	22.93	9	IQSEGGTTELWDERQEQFQCAGIVAMR	2	4	23.47	18.05	1047.17	3139.46	0.0238	(R)	IQSEGGTTELWDERQEQFQCAGIVAMR	(S)	Sesamum indicum	Sesamum indicum|UNREADABLE	AAD42944.1	NP_001291336.1|sp|Q9XHP0.1|11S2_SESIN|AAD42944.1	9	2.1	332.9	11S globulin precursor
1	2	994.949	0.0146	7.4	3520000	9.82	9.82	64.7	9.8	11	MTFVRPDEEEGEQEHR	2	6	19.45	10.42	663.637	1988.88	0.0186	(R)	MTFVRPDEEEGEQEHR	(G)	Sesamum indicum	Sesamum indicum|UNREADABLE	AAD42944.1	NP_001291336.1|sp|Q9XHP0.1|11S2_SESIN|AAD42944.1	10	2.1	332.9	11S globulin precursor
1	2	769.373	0.0139	9.1	35400000	21.58	22.18	98	17.07	11	QEQFQCAGIVAMR	2	3	21.58	22.18	769.373	1537.72	0.0139	(R)	QEQFQCAGIVAMR	(S)	Sesamum indicum	Sesamum indicum|UNREADABLE	AAD42944.1	NP_001291336.1|sp|Q9XHP0.1|11S2_SESIN|AAD42944.1	11	2.1	332.9	11S globulin precursor
6	3	1484.04	0.0197	4.4	35500000	10.82	12.71	71.1	30.95	12	QGDIVAIPSGAAHWCYNDGSEDLVAVSINDVNHLSNQLDQK	2	10	19.12	19.12	890.829	4450.1	0.0138	(R)	QGDIVAIPSGAAHWCYNDGSEDLVAVSINDVNHLSNQLDQK	(F)	Sesamum indicum	UNREADABLE|Sesamum indicum	AAD42944.1	NP_001291336.1|sp|Q9XHP0.1|11S2_SESIN|AAD42944.1	12	2.1	332.9	11S globulin precursor
2	2	531.782	0.0095	8.9	23200000	11.41	11.26	55.4	12.65	11	QTFHNIFR	1	2	11.41	11.26	531.782	1062.55	0.0095	(R)	QTFHNIFR	(A)	Sesamum indicum	Sesamum indicum|UNREADABLE	AAD42944.1	NP_001291336.1|sp|Q9XHP0.1|11S2_SESIN|AAD42944.1	13	2.1	332.9	11S globulin precursor
1	2	516.744	0.0101	9.8	6480000	17.38	19.32	88.5	1.45	5	SGEQEQQAR	2	2	17.38	19.32	516.744	1032.47	0.0101	(R)	SGEQEQQAR	(Q)	Sesamum indicum	Sesamum indicum|UNREADABLE	AAD42944.1	NP_001291336.1|sp|Q9XHP0.1|11S2_SESIN|AAD42944.1	14	2.1	332.9	11S globulin precursor
1	2	532.241	0.0104	9.8	4350000	14.67	7.89	87.8	1.53	8	TEASEQQDR	1	1	14.67	7.89	532.241	1063.47	0.0104	(R)	TEASEQQDR	(G)	Sesamum indicum	Sesamum indicum|UNREADABLE	AAD42944.1	NP_001291336.1|sp|Q9XHP0.1|11S2_SESIN|AAD42944.1	15	2.1	332.9	11S globulin precursor
1	2	1045.51	0.0145	6.9	26800000	17.39	15.62	96.9	22.6	12	VNQGEMFVVPQYYTSTAR	2	2	18.59	15.93	1045.51	2090	0.0141	(R)	VNQGEMFVVPQYYTSTAR	(A)	Sesamum indicum	Sesamum indicum|UNREADABLE	AAD42944.1	NP_001291336.1|sp|Q9XHP0.1|11S2_SESIN|AAD42944.1	16	2.1	332.9	11S globulin precursor
2	4	930.46	0.0314	8.5	3020000	14.56	14.56	79.2	27.78	11	YMDLSAEKGNLYSNALVSPDWSMTGHTIVYVTR	1	2	14.56	14.56	930.46	3718.79	0.0314	(K)	YMDLSAEKGNLYSNALVSPDWSMTGHTIVYVTR	(G)	Sesamum indicum	Sesamum indicum|UNREADABLE	AAD42944.1	NP_001291336.1|sp|Q9XHP0.1|11S2_SESIN|AAD42944.1	17	2.1	332.9	11S globulin precursor
2	2	702.339	0.0122	8.7	54900000	18.33	18.33	86.7	19.67	12	AGEQGFEYVTFR	1	2	18.33	18.33	702.339	1403.66	0.0122	(R)	AGEQGFEYVTFR	(T)	Sesamum indicum	Sesamum indicum	ABB60054.1	NP_001291327.1|ABB60054.1	1	3.1	304.4	11S globulin precursor isoform 3
3	2	766.902	0.0119	7.7	14800000	13.67	12.97	73.2	7.32	10	AKTECQVQQLTAR	2	5	13.67	12.97	766.902	1532.79	0.0119	(R)	AKTECQVQQLTAR	(Q)	Sesamum indicum	Sesamum indicum	ABB60054.1	NP_001291327.1|ABB60054.1	2	3.1	304.4	11S globulin precursor isoform 3
1	2	811.893	0.0129	7.9	45300000	24.86	20.52	97	25.6	13	AMPDEVVMNAFGVSR	2	2	24.86	20.52	811.893	1622.77	0.0129	(R)	AMPDEVVMNAFGVSR	(E)	Sesamum indicum	Sesamum indicum	ABB60054.1	NP_001291327.1|ABB60054.1	3	3.1	304.4	11S globulin precursor isoform 3
1	2	568.278	0.0108	9.5	15300000	15.86	14.82	92.4	11.83	13	DEATVFSPGGR	1	1	15.86	14.82	568.278	1135.54	0.0108	(R)	DEATVFSPGGR	(T)	Sesamum indicum	Sesamum indicum	ABB60054.1	ABB60054.1	4	3.1	304.4	11S globulin precursor isoform 3
6	3	777.392	0.0212	9.1	42100000	18.84	18.84	94.6	23.75	14	EGVTHWAYNDGDTPIISVSIR	2	13	20.27	20.27	1165.58	2330.14	0.0121	(R)	EGVTHWAYNDGDTPIISVSIR	(D)	Sesamum indicum	Sesamum indicum	ABB60054.1	NP_001291327.1|ABB60054.1	5	3.1	304.4	11S globulin precursor isoform 3
4	2	870.415	0.0129	7.4	14000000	13.3	13.3	65.7	5.67	9	ENIEHTAATHSYNPR	2	7	15.81	15.81	870.414	1739.81	0.0108	(R)	ENIEHTAATHSYNPR	(G)	Sesamum indicum	Sesamum indicum	ABB60054.1	NP_001291327.1|ABB60054.1	6	3.1	304.4	11S globulin precursor isoform 3
1	2	1034.01	0.0146	7.1	37000000	25.75	25.99	93.5	19.83	12	FFLAGNPQTAQFQGQQER	2	3	28.25	23.34	1034.01	2067	0.0115	(K)	FFLAGNPQTAQFQGQQER	(E)	Sesamum indicum	Sesamum indicum	ABB60054.1	NP_001291327.1|ABB60054.1	7	3.1	304.4	11S globulin precursor isoform 3
1	4	1294.38	-0.0133	-2.6	4280000	7.32	10.03	54.5	35.95	21	GLLLPYYTNAPQLVYIVRGSGIQGTVIPGCAETYESESGVGSTGEEEGR	1	1	7.32	10.03	1294.38	5174.53	-0.0133	(R)	GLLLPYYTNAPQLVYIVRGSGIQGTVIPGCAETYESESGVGSTGEEEGR	(Q)	Sesamum indicum	Sesamum indicum	ABB60054.1	NP_001291327.1|ABB60054.1	8	3.1	304.4	11S globulin precursor isoform 3
2	3	670.337	0.0029	1.4	6260000	9.93	9.14	60.4	5.93	10	IRENIEHTAATHSYNPR	2	3	9.93	9.14	670.337	2008.99	0.0029	(R)	IRENIEHTAATHSYNPR	(G)	Sesamum indicum	Sesamum indicum	ABB60054.1	NP_001291327.1|ABB60054.1	9	3.1	304.4	11S globulin precursor isoform 3
3	2	892.525	0.0154	8.6	246000000	20.06	17.38	95.6	28.1	20	ISTINSQTLPILSQLR	2	5	20.07	18.79	892.524	1784.03	0.0126	(R)	ISTINSQTLPILSQLR	(L)	Sesamum indicum	Sesamum indicum	ABB60054.1	NP_001291327.1|ABB60054.1	10	3.1	304.4	11S globulin precursor isoform 3
3	2	1098.06	0.0116	5.3	6240000	12.31	16.22	60.1	16.9	10	KFFLAGNPQTAQFQGQQER	2	7	21.51	21.61	732.377	2195.1	0.0173	(R)	KFFLAGNPQTAQFQGQQER	(E)	Sesamum indicum	Sesamum indicum	ABB60054.1	NP_001291327.1|ABB60054.1	11	3.1	304.4	11S globulin precursor isoform 3
5	3	1049.49	0.0283	9	29500000	23.6	24.03	96.1	30.57	12	LQSEAGVTEFWDANNEEFQCAGIEFVR	2	12	23.6	24.03	1049.49	3146.42	0.0283	(R)	LQSEAGVTEFWDANNEEFQCAGIEFVR	(H)	Sesamum indicum	Sesamum indicum	ABB60054.1	NP_001291327.1|ABB60054.1	12	3.1	304.4	11S globulin precursor isoform 3
4	2	1106.55	0.0092	4.2	4490000	14.4	18.11	64.4	15.87	12	NGITAPHWSTNSHSALYVTR	2	8	16.53	12.53	738.041	2212.09	0.0193	(R)	NGITAPHWSTNSHSALYVTR	(G)	Sesamum indicum	Sesamum indicum	ABB60054.1	NP_001291327.1|ABB60054.1	13	3.1	304.4	11S globulin precursor isoform 3
2	2	1319.72	0.0162	6.1	64700000	21.17	18.92	97.4	31.45	11	SVLNEEVNEGQLVVVPQNFALAIR	2	4	21.17	18.92	1319.72	2638.42	0.0162	(R)	SVLNEEVNEGQLVVVPQNFALAIR	(A)	Sesamum indicum	Sesamum indicum	ABB60054.1	NP_001291327.1|ABB60054.1	14	3.1	304.4	11S globulin precursor isoform 3
1	2	667.337	0.0132	9.9	24500000	22.39	18.99	94.2	9	11	TECQVQQLTAR	2	2	22.39	18.99	667.337	1333.65	0.0132	(K)	TECQVQQLTAR	(Q)	Sesamum indicum	Sesamum indicum	ABB60054.1	NP_001291327.1|ABB60054.1	15	3.1	304.4	11S globulin precursor isoform 3
1	2	784.884	0.0145	9.2	7880000	6.43	6.43	47.3	10.4	16	YNRDEATVFSPGGR	1	1	6.43	6.43	784.884	1568.75	0.0145	(K)	YNRDEATVFSPGGR	(T)	Sesamum indicum	Sesamum indicum	ABB60054.1	NP_001291327.1|ABB60054.1	16	3.1	304.4	11S globulin precursor isoform 3
4	2	819.904	0.0126	7.7	18400000	18.4	15.94	80.4	6.18	14	YWQSLQQHQQHR	2	8	18.4	15.94	819.904	1638.79	0.0126	(R)	YWQSLQQHQQHR	(L)	Sesamum indicum	Sesamum indicum	ABB60054.1	NP_001291327.1|ABB60054.1	17	3.1	304.4	11S globulin precursor isoform 3
3	2	855.919	0.0126	7.4	50000000	24.11	19.04	97.3	23.4	17	AMPEEVVMTAYQVSR	2	5	24.11	19.04	855.919	1710.82	0.0126	(R)	AMPEEVVMTAYQVSR	(D)	Sesamum indicum	Sesamum indicum	AAK15087.1	NP_001291328.1|AAK15087.1	1	4.1	301.98	11S globulin
3	2	755.371	0.0125	8.3	42200000	19.5	20.7	93.7	24.65	12	ASQDEGLEWISFK	2	6	21.76	22.75	755.371	1509.72	0.012	(R)	ASQDEGLEWISFK	(T)	Sesamum indicum	Sesamum indicum	AAK15087.1	NP_001291328.1|AAK15087.1	2	4.1	301.98	11S globulin
1	2	835.984	0.013	7.8	19500000	12.55	10.52	92.2	23.17	11	EGQLIIVPQNYVVAK	2	2	15.44	13.31	835.984	1670.95	0.0126	(R)	EGQLIIVPQNYVVAK	(R)	Sesamum indicum	Sesamum indicum	AAK15087.1	NP_001291328.1|AAK15087.1	3	4.1	301.98	11S globulin
2	2	793.866	0.0128	8.1	19100000	22.31	22.08	95.1	24.48	11	FESEAGLTEFWDR	2	3	22.31	22.08	793.866	1586.71	0.0128	(R)	FESEAGLTEFWDR	(N)	Sesamum indicum	Sesamum indicum	AAK15087.1	NP_001291328.1|AAK15087.1	4	4.1	301.98	11S globulin
1	2	867.934	0.0127	7.3	25300000	11.1	6.82	88	19.18	11	GIQGTVIPGCAETFER	2	2	16.47	11.65	867.933	1734.85	0.0112	(R)	GIQGTVIPGCAETFER	(D)	Sesamum indicum	Sesamum indicum	AAK15087.1	NP_001291328.1|AAK15087.1	5	4.1	301.98	11S globulin
3	2	1040.6	0.015	7.2	31100000	24.6	21.17	89.9	27.27	12	GLLLPHYNNAPQLLYVVR	2	6	24.6	21.17	1040.6	2080.17	0.015	(R)	GLLLPHYNNAPQLLYVVR	(G)	Sesamum indicum	Sesamum indicum	AAK15087.1	NP_001291328.1|AAK15087.1	6	4.1	301.98	11S globulin
1	2	650.837	0.0127	9.7	5540000	16.02	10.4	83.8	12.8	23	HFFLAGNPQGGR	2	2	17.32	11.89	650.837	1300.65	0.0121	(R)	HFFLAGNPQGGR	(Q)	Sesamum indicum	Sesamum indicum	AAK15087.1	NP_001291328.1|AAK15087.1	7	4.1	301.98	11S globulin
1	2	900.032	0.0137	7.6	25600000	18.01	14.34	90	38.75	14	ISSLNSLTLPVLSWLR	2	3	18.01	14.34	900.032	1799.04	0.0137	(R)	ISSLNSLTLPVLSWLR	(L)	Sesamum indicum	Sesamum indicum	AAK15087.1	NP_001291328.1|AAK15087.1	8	4.1	301.98	11S globulin
1	2	764.387	0.0128	8.4	15300000	19.06	14.28	94.7	20.98	11	LDIVLPGEEEEER	2	2	19.06	14.28	764.387	1527.75	0.0128	(R)	LDIVLPGEEEEER	(W)	Sesamum indicum	Sesamum indicum	AAK15087.1	NP_001291328.1|AAK15087.1	9	4.1	301.98	11S globulin
4	2	1000	0.0152	7.6	19300000	11.49	8.15	70.2	22.45	10	LDIVLPGEEEEERWER	2	7	21.11	14.09	667.004	1998.98	0.0191	(R)	LDIVLPGEEEEERWER	(D)	Sesamum indicum	Sesamum indicum	AAK15087.1	NP_001291328.1|AAK15087.1	10	4.1	301.98	11S globulin
3	2	606.826	0.012	9.9	20900000	8.94	9.17	72.9	6.03	8	LRENLDEPAR	2	7	8.94	9.17	606.826	1212.63	0.012	(K)	LRENLDEPAR	(A)	Sesamum indicum	Sesamum indicum	AAK15087.1	NP_001291328.1|AAK15087.1	11	4.1	301.98	11S globulin
2	3	763.753	0.0204	8.9	1990000	17.04	15.44	82	24.5	11	NGLVAPHWNLNAHSIIYITR	2	3	17.04	15.44	763.753	2289.23	0.0204	(R)	NGLVAPHWNLNAHSIIYITR	(G)	Sesamum indicum	Sesamum indicum	AAK15087.1	NP_001291328.1|AAK15087.1	12	4.1	301.98	11S globulin
1	2	782.376	0.0116	7.4	9810000	19.99	19.99	93.4	12.57	9	NNQQFECAGVAAVR	2	2	22.62	22.62	782.376	1563.73	0.0111	(R)	NNQQFECAGVAAVR	(N)	Sesamum indicum	Sesamum indicum	AAK15087.1	NP_001291328.1|AAK15087.1	13	4.1	301.98	11S globulin
1	2	670.839	0.0112	8.3	1150000	9.41	8.65	63.3	6.5	9	QSYFGRPQTEK	2	3	9.41	8.65	670.839	1340.66	0.0112	(R)	QSYFGRPQTEK	(Q)	Sesamum indicum	Sesamum indicum	AAK15087.1	NP_001291328.1|AAK15087.1	14	4.1	301.98	11S globulin
1	2	833.419	0.0085	5.1	791000	11.64	7.13	75	21.78	10	RASQDEGLEWISFK	1	1	11.64	7.13	833.419	1665.82	0.0085	(K)	RASQDEGLEWISFK	(T)	Sesamum indicum	Sesamum indicum	AAK15087.1	NP_001291328.1|AAK15087.1	15	4.1	301.98	11S globulin
2	2	689.828	0.0116	8.4	15500000	20.95	20.95	93.4	9.5	9	TNDNAMTSQLAGR	2	5	20.95	20.95	689.828	1378.64	0.0116	(K)	TNDNAMTSQLAGR	(L)	Sesamum indicum	Sesamum indicum	AAK15087.1	NP_001291328.1|AAK15087.1	16	4.1	301.98	11S globulin
1	2	392.205	0.0036	4.6	302000	11.19	6.3	84.5	3.25	0	VFSSTSR	1	1	11.19	6.3	392.205	783.399	0.0036	(R)	VFSSTSR	(Y)	Sesamum indicum	Sesamum indicum	AAK15087.1	NP_001291328.1|AAK15087.1	17	4.1	301.98	11S globulin
1	2	733.849	0.0105	7.2	1690000	21.51	21.51	93.8	23.97	10	EGEDWFLLQDSK	2	2	21.51	21.51	733.849	1466.68	0.0105	(R)	EGEDWFLLQDSK	(H)	Sesamum indicum	Sesamum indicum	XP_011089873.1	XP_011089873.1	1	5.1	216.41	vicilin-like seed storage protein At2g28490
1	2	592.278	0.0116	9.8	1740000	17.79	17.79	91.9	11.92	10	GPDAYNIYDR	2	2	17.79	17.79	592.278	1183.54	0.0116	(K)	GPDAYNIYDR	(K)	Sesamum indicum	Sesamum indicum	XP_011089873.1	XP_011089873.1	2	5.1	216.41	vicilin-like seed storage protein At2g28490
1	2	733.855	0.0123	8.4	846000	20.65	21.48	94	22.73	9	GPEFAAAFGLSEDR	2	3	22.37	21.36	733.854	1466.69	0.0095	(R)	GPEFAAAFGLSEDR	(L)	Sesamum indicum	Sesamum indicum	XP_011089873.1	XP_011089873.1	3	5.1	216.41	vicilin-like seed storage protein At2g28490
1	3	840.101	0.0213	8.5	1320000	18.17	21.03	91.4	30.15	11	GPEFAAAFGLSEDRLNEIINAQR	1	1	18.17	21.03	840.101	2518.27	0.0213	(R)	GPEFAAAFGLSEDRLNEIINAQR	(E)	Sesamum indicum	Sesamum indicum	XP_011089873.1	XP_011089873.1	4	5.1	216.41	vicilin-like seed storage protein At2g28490
1	2	922.441	0.0107	5.8	1140000	20.66	21.52	92.1	21.43	10	IEAGSAFYLMNTGEGQR	2	3	22.17	18.95	922.441	1843.86	0.0095	(R)	IEAGSAFYLMNTGEGQR	(L)	Sesamum indicum	Sesamum indicum	XP_011089873.1	XP_011089873.1	5	5.1	216.41	vicilin-like seed storage protein At2g28490
1	3	892.42	0.0188	7	1170000	13.32	13.32	76	23.5	14	KPDFQNNYGWSTALDESDYSPLK	2	2	20.45	20.45	892.418	2675.23	0.0122	(R)	KPDFQNNYGWSTALDESDYSPLK	(H)	Sesamum indicum	Sesamum indicum	XP_011089873.1	XP_011089873.1	6	5.1	216.41	vicilin-like seed storage protein At2g28490
2	3	684.055	0.0196	9.6	2090000	12.54	12.54	63.1	23.2	11	NNRPQFLVGANSLLHTLR	1	2	12.54	12.54	684.055	2050.13	0.0196	(R)	NNRPQFLVGANSLLHTLR	(G)	Sesamum indicum	Sesamum indicum	XP_011089873.1	XP_011089873.1	7	5.1	216.41	vicilin-like seed storage protein At2g28490
1	2	744.38	0.0148	10	591000	7.59	7.59	64.4	21.43	6	SPMHIGFITMEPK	1	1	7.59	7.59	744.38	1487.74	0.0148	(K)	SPMHIGFITMEPK	(T)	Sesamum indicum	Sesamum indicum	XP_011089873.1	XP_011089873.1	8	5.1	216.41	vicilin-like seed storage protein At2g28490
1	2	782.881	0.0126	8	3930000	20.02	18.47	89.8	29.97	15	TGPFEFFGFTTSAR	2	2	21.14	20.99	782.881	1564.74	0.0115	(R)	TGPFEFFGFTTSAR	(N)	Sesamum indicum	Sesamum indicum	XP_011089873.1	XP_011089873.1	9	5.1	216.41	vicilin-like seed storage protein At2g28490
1	2	1013.08	0.0088	4.3	1520000	17.53	17.07	87.4	40.62	10	TLFIPQYLDSSLILFVR	2	2	20.94	17.78	1013.08	2025.14	0.0086	(K)	TLFIPQYLDSSLILFVR	(R)	Sesamum indicum	Sesamum indicum	XP_011089873.1	XP_011089873.1	10	5.1	216.41	vicilin-like seed storage protein At2g28490
2	2	729.396	0.0102	7	1950000	11.79	10.72	68	8.62	10	VGHIYKDELVER	2	4	11.79	10.72	729.396	1457.77	0.0102	(R)	VGHIYKDELVER	(R)	Sesamum indicum	Sesamum indicum	XP_011089873.1	XP_011089873.1	11	5.1	216.41	vicilin-like seed storage protein At2g28490
2	2	659.357	0.0128	9.7	6770000	19.95	15.54	95	23.38	10	VTEGNVFWIPR	2	3	19.95	15.54	659.357	1317.69	0.0128	(K)	VTEGNVFWIPR	(Y)	Sesamum indicum	Sesamum indicum	XP_011089873.1	XP_011089873.1	12	5.1	216.41	vicilin-like seed storage protein At2g28490
2	2	506.716	0.0101	9.9	565000	10.09	10.09	61.7	2.47	8	CQEEYQR	2	4	10.09	10.09	506.716	1012.42	0.0101	(R)	CQEEYQR	(E)	Sesamum indicum	Sesamum indicum	AAK15089.1	NP_001291343.1|AAK15089.1	1	6.1	154.07	7S globulin
1	2	614.764	0.0086	7	643000	9.53	9.53	60.1	1.18	7	GCEQQHGEQR	2	3	15.25	15.25	614.763	1228.51	0.0071	(R)	GCEQQHGEQR	(E)	Sesamum indicum	Sesamum indicum	AAK15089.1	NP_001291343.1|AAK15089.1	2	6.1	154.07	7S globulin
2	2	653.865	0.0119	9.1	4660000	20.27	14.62	92.2	15.63	9	INAGTTAYLINR	2	3	21.57	15.24	653.865	1306.71	0.012	(K)	INAGTTAYLINR	(D)	Sesamum indicum	Sesamum indicum	AAK15089.1	NP_001291343.1|AAK15089.1	3	6.1	154.07	7S globulin
2	2	934.976	0.0126	6.8	3400000	16.59	16.12	71.1	26.42	12	IPYVFEDQHFITGFR	2	5	22.18	22.18	934.975	1868.93	0.0091	(R)	IPYVFEDQHFITGFR	(T)	Sesamum indicum	Sesamum indicum	AAK15089.1	NP_001291343.1|AAK15089.1	4	6.1	154.07	7S globulin
4	3	982.16	0.0259	8.8	14900000	27	26.32	100	37.47	10	LLQPVSTPGEFELFFGAGGENPESFFK	2	7	27	26.32	982.16	2944.44	0.0259	(K)	LLQPVSTPGEFELFFGAGGENPESFFK	(S)	Sesamum indicum	Sesamum indicum	AAK15089.1	NP_001291343.1|AAK15089.1	5	6.1	154.07	7S globulin
1	2	441.702	0.0083	9.4	242000	11.57	7.17	66.5	1.8	7	QYQQCR	1	1	11.57	7.17	441.702	882.389	0.0083	(K)	QYQQCR	(L)	Sesamum indicum	Sesamum indicum	AAK15089.1	NP_001291343.1|AAK15089.1	6	6.1	154.07	7S globulin
1	2	800.393	0.014	8.7	3760000	19.14	19.14	91.8	29.13	11	SFSDEILEAAFNTR	2	2	19.14	19.14	800.393	1599.76	0.014	(K)	SFSDEILEAAFNTR	(R)	Sesamum indicum	Sesamum indicum	AAK15089.1	NP_001291343.1|AAK15089.1	7	6.1	154.07	7S globulin
1	2	595.285	0.0109	9.1	1430000	7.69	5.37	53.4	18.47	11	SQQEEFFFK	1	1	7.69	5.37	595.285	1189.55	0.0109	(R)	SQQEEFFFK	(G)	Sesamum indicum	Sesamum indicum	AAK15089.1	NP_001291343.1|AAK15089.1	8	6.1	154.07	7S globulin
1	3	1003.87	0.0234	7.8	2310000	16.78	10.74	84.5	31.63	10	VAILEAEPQTFIVPNHWDAESVVFVAK	2	2	19.58	15.72	1003.87	3009.57	0.0186	(R)	VAILEAEPQTFIVPNHWDAESVVFVAK	(G)	Sesamum indicum	Sesamum indicum	AAK15089.1	NP_001291343.1|AAK15089.1	9	6.1	154.07	7S globulin
1	2	611.786	0.0095	7.8	555000	14.35	14.35	86	2.97	8	ALSQESEESSR	2	3	14.35	14.35	611.786	1222.55	0.0095	(R)	ALSQESEESSR	(G)	Sesamum indicum	Sesamum indicum	XP_011090693.1	XP_011090693.1	1	7.1	137.38	vicilin-like antimicrobial peptides 2-2
1	2	726.368	0.0089	6.2	799000	18.11	17.11	90.6	25.1	10	DLDVSVGFMNINK	2	2	18.11	17.11	726.368	1451.72	0.0089	(K)	DLDVSVGFMNINK	(G)	Sesamum indicum	Sesamum indicum	XP_011090693.1	XP_011090693.1	2	7.1	137.38	vicilin-like antimicrobial peptides 2-2
1	2	612.317	0.0099	8.1	396000	11.29	11.29	80.2	16.25	9	GTISYVWQNR	2	3	12.08	12.32	612.317	1223.62	0.0091	(K)	GTISYVWQNR	(R)	Sesamum indicum	Sesamum indicum	XP_011090693.1	XP_011090693.1	3	7.1	137.38	vicilin-like antimicrobial peptides 2-2
1	2	547.825	0.0108	9.9	752000	12.44	6.78	84.6	11.2	10	LLQPVNTPGR	2	2	16.28	9.04	547.824	1094.63	0.0101	(K)	LLQPVNTPGR	(F)	Sesamum indicum	Sesamum indicum	XP_011090693.1	XP_011090693.1	4	7.1	137.38	vicilin-like antimicrobial peptides 2-2
1	2	492.308	0.0096	9.8	414000	15.17	8.88	88.8	15.22	10	LVLVVGGNGR	1	1	15.17	8.88	492.308	983.6	0.0096	(K)	LVLVVGGNGR	(F)	Sesamum indicum	Sesamum indicum	XP_011090693.1	XP_011090693.1	5	7.1	137.38	vicilin-like antimicrobial peptides 2-2
1	2	955.473	0.0098	5.1	1030000	20.64	15.46	90.8	28.87	11	TFSNEILEAAFNVPSDR	2	4	20.64	15.46	955.473	1909.93	0.0098	(R)	TFSNEILEAAFNVPSDR	(L)	Sesamum indicum	Sesamum indicum	XP_011090693.1	XP_011090693.1	6	7.1	137.38	vicilin-like antimicrobial peptides 2-2
2	2	644.38	0.0112	8.7	6640000	20.69	18.52	88.5	20.92	10	VPAGSIVYLVNR	1	2	20.69	18.52	644.38	1287.74	0.0112	(R)	VPAGSIVYLVNR	(D)	Sesamum indicum	Sesamum indicum	XP_011090693.1	XP_011090693.1	7	7.1	137.38	vicilin-like antimicrobial peptides 2-2
1	2	1056.51	0.0073	3.4	462000	20.06	20.06	79.7	26.67	9	YFLAGQDNIWNQVESEAK	1	1	20.06	20.06	1056.51	2112	0.0073	(K)	YFLAGQDNIWNQVESEAK	(E)	Sesamum indicum	Sesamum indicum	XP_011090693.1	XP_011090693.1	8	7.1	137.38	vicilin-like antimicrobial peptides 2-2
2	3	756.437	0.0224	9.9	4900000	19.91	20.53	90.3	32.97	13	ALMLPLYHNAPILVYVVQGR	2	4	19.91	20.53	756.437	2267.27	0.0224	(R)	ALMLPLYHNAPILVYVVQGR	(G)	Sesamum indicum	Sesamum indicum	XP_011080043.1	XP_011080043.1	1	8.1	118.67	legumin B
2	2	792.947	0.0116	7.3	3610000	12.62	6.86	90.4	20.48	10	EGQVVVVPQNFAAVK	2	3	14.66	9.2	792.946	1584.87	0.0098	(R)	EGQVVVVPQNFAAVK	(Q)	Sesamum indicum	Sesamum indicum	XP_011080043.1	XP_011080043.1	2	8.1	118.67	legumin B
1	2	479.756	0.0095	9.9	4600000	10.04	8.16	71.3	2.4	7	ENLDKPSR	1	1	10.04	8.16	479.756	958.495	0.0095	(R)	ENLDKPSR	(A)	Sesamum indicum	Sesamum indicum	XP_011080043.1	XP_020549903.1|ABB60055.1|XP_011080043.1	3	8.1	118.67	legumin B
1	2	533.785	0.0104	9.7	1100000	17.49	16.17	90.4	13.7	11	ETIIFSGSGR	1	1	17.49	16.17	533.785	1066.55	0.0104	(R)	ETIIFSGSGR	(S)	Sesamum indicum	Sesamum indicum	XP_011080043.1	XP_011080043.1	4	8.1	118.67	legumin B
1	2	710.329	0.0081	5.7	349000	6.86	6.86	53.6	9.6	8	GGTWQQGECQIR	1	1	6.86	6.86	710.329	1419.64	0.0081	(R)	GGTWQQGECQIR	(S)	Sesamum indicum	Sesamum indicum	XP_011080043.1	XP_011080043.1	5	8.1	118.67	legumin B
1	2	801.952	0.0122	7.6	4470000	23.78	21.51	96.7	28.45	11	GLPVDVIATAYQISR	2	3	23.78	21.51	801.952	1602.88	0.0122	(R)	GLPVDVIATAYQISR	(E)	Sesamum indicum	Sesamum indicum	XP_011080043.1	XP_011080043.1	6	8.1	118.67	legumin B
1	2	503.263	0.0073	7.3	853000	11.33	6.48	85.4	10.02	12	GQAVFDGGVR	1	1	11.33	6.48	503.263	1005.51	0.0073	(K)	GQAVFDGGVR	(E)	Sesamum indicum	Sesamum indicum	XP_011080043.1	XP_011080043.1	7	8.1	118.67	legumin B
1	2	552.301	0.0099	8.9	2480000	14.6	11.19	89.8	16.72	11	SFLLAGNPER	1	1	14.6	11.19	552.301	1103.58	0.0099	(R)	SFLLAGNPER	(G)	Sesamum indicum	Sesamum indicum	XP_011080043.1	XP_011080043.1	8	8.1	118.67	legumin B
1	2	641.849	0.0109	8.5	1180000	22.64	14.97	94.7	26.57	9	AAISQFFETLR	2	2	22.64	14.97	641.849	1282.68	0.0109	(K)	AAISQFFETLR	(V)	Sesamum indicum	Sesamum indicum	AAL09328.1	NP_001291322.1|AAL13315.1|AAL09328.1	1	9.1	82.77	steroleosin
1	2	578.327	0.0102	8.8	691000	16.82	12.43	87.6	17.05	8	DLGSPDVVVVR	2	2	18.13	12.87	578.326	1155.64	0.0085	(R)	DLGSPDVVVVR	(A)	Sesamum indicum	Sesamum indicum	AAL09328.1	AAL09328.1	2	9.1	82.77	steroleosin
1	2	614.854	0.0116	9.5	1310000	12.53	11.85	75.7	16.68	9	DVQVSTTPILR	2	2	13.25	10.52	614.852	1228.69	0.0081	(R)	DVQVSTTPILR	(V)	Sesamum indicum	Sesamum indicum	AAL09328.1	NP_001291322.1|AAL13315.1|AAL09328.1	3	9.1	82.77	steroleosin
1	2	800.44	0.0098	6.2	1470000	20.66	16.31	94.7	21.57	13	SLLYPETVQVPEPK	2	2	20.66	16.31	800.44	1599.86	0.0098	(K)	SLLYPETVQVPEPK	(N)	Sesamum indicum	Sesamum indicum	AAL09328.1	NP_001291322.1|AAL13315.1|AAL09328.1	4	9.1	82.77	steroleosin
1	2	447.754	0.0079	8.9	343000	8.09	2.45	76.7	10.58	8	VLDYTGVK	1	1	8.09	2.45	447.754	894.493	0.0079	(K)	VLDYTGVK	(S)	Sesamum indicum	Sesamum indicum	AAL09328.1	AAL09328.1	5	9.1	82.77	steroleosin
1	2	674.815	0.0122	9	2050000	17.4	15.4	89.4	10.13	9	AEEEGIEIDESK	2	2	21.07	15.14	674.815	1348.61	0.0117	(R)	AEEEGIEIDESK	(F)	Sesamum indicum	Sesamum indicum	XP_011084893.1	XP_011084893.1	1	10.1	69.33	em-like protein GEA6
1	2	749.341	0.0111	7.4	1160000	13.31	13.31	79.6	11.35	9	EQLGTEGYQEMGR	2	3	17.59	17.59	749.341	1497.66	0.0112	(R)	EQLGTEGYQEMGR	(K)	Sesamum indicum	Sesamum indicum	XP_011084893.1	XP_011084893.1	2	10.1	69.33	em-like protein GEA6
1	2	593.812	0.01	8.4	659000	13.51	11.92	81.3	6.12	8	QGETVVPGGTGGK	1	1	13.51	11.92	593.812	1186.61	0.01	(K)	QGETVVPGGTGGK	(S)	Sesamum indicum	Sesamum indicum	XP_011084893.1	XP_011084893.1|XP_011077537.1	3	10.1	69.33	em-like protein GEA6
3	2	670.339	0.0114	8.5	3670000	17.16	17.81	77.8	7.8	9	SLEAQEHLAEGR	2	5	17.16	17.81	670.339	1339.66	0.0114	(K)	SLEAQEHLAEGR	(S)	Sesamum indicum	Sesamum indicum	XP_011084893.1	XP_011084893.1|XP_011077537.1	4	10.1	69.33	em-like protein GEA6
2	2	655.787	0.0119	9.1	19600000	17.58	17.58	96.1	9.13	9	EQEMQQMMQK	2	3	17.58	17.58	655.787	1310.55	0.0119	(R)	EQEMQQMMQK	(A)	Sesamum indicum	Sesamum indicum	ABB60053.1	XP_011095337.1|ABB60053.1	1	11.1	68.82	2S albumin precursor isoform 3
2	2	695.779	0.0132	9.5	6280000	14.63	14.63	79.1	10.52	10	MCGMSYPTQCR	2	3	14.63	14.63	695.779	1390.54	0.0132	(R)	MCGMSYPTQCR	(L)	Sesamum indicum	Sesamum indicum	ABB60053.1	XP_011095337.1|ABB60053.1	2	11.1	68.82	2S albumin precursor isoform 3
2	2	618.754	0.0109	8.8	6650000	19.14	13.31	87.8	11.5	11	MGHCMQWMR	1	2	19.14	13.31	618.754	1236.49	0.0109	(R)	MGHCMQWMR	(S)	Sesamum indicum	Sesamum indicum	ABB60053.1	XP_011095337.1|ABB60053.1	3	11.1	68.82	2S albumin precursor isoform 3
1	2	490.212	0.008	8.1	4790000	15.45	15.45	76.5	3.3	2	QCCNELR	2	2	17.47	17.47	490.212	979.408	0.008	(R)	QCCNELR	(A)	Sesamum indicum	Sesamum indicum	ABB60053.1	XP_011095337.1|ABB60053.1	4	11.1	68.82	2S albumin precursor isoform 3
2	2	810.911	0.0106	6.5	2920000	14.5	13.06	75.2	29.7	10	LTLGELWSMTEANR	2	4	19.63	20.47	810.911	1620.81	0.0096	(R)	LTLGELWSMTEANR	(E)	Sesamum indicum	Sesamum indicum|UNREADABLE	AAF13743.1	NP_001291323.1|sp|Q9SQ57.1|PXG_SESIN|AAF13743.1|CBC09653.1|CBC01392.1|CAW44147.1|CAW35358.1	1	12.1	55.71	caleosin
1	3	697.052	0.0201	9.6	1410000	14.05	11.21	87.5	20.25	10	NAALAPDAPLAPVTMERPVR	2	2	15.56	13.49	697.053	2089.12	0.0206	(R)	NAALAPDAPLAPVTMERPVR	(T)	Sesamum indicum	Sesamum indicum|UNREADABLE	AAF13743.1	NP_001291323.1|sp|Q9SQ57.1|PXG_SESIN|AAF13743.1|CBC09653.1|CBC01392.1|CAW44147.1|CAW35358.1	2	12.1	55.71	caleosin
1	2	751.876	0.0105	7	1820000	15.17	7.56	87	30.18	12	YLPMNFENLFSK	2	2	20.52	13.1	751.877	1502.73	0.0113	(R)	YLPMNFENLFSK	(H)	Sesamum indicum	Sesamum indicum|UNREADABLE	AAF13743.1	NP_001291323.1|sp|Q9SQ57.1|PXG_SESIN|AAF13743.1|CBC09653.1|CBC01392.1|CAW44147.1|CAW35358.1	3	12.1	55.71	caleosin
2	3	873.804	0.0204	7.8	2500000	14.95	11.59	76.3	20.87	11	IATPANWKPGDPVVISPTVSNQEAK	2	4	14.95	11.59	873.804	2619.38	0.0204	(K)	IATPANWKPGDPVVISPTVSNQEAK	(Q)	Sesamum indicum	Sesamum indicum	XP_011100693.1	XP_011100693.1	1	13.1	51.02	1-Cys peroxiredoxin
1	3	637.665	0.0187	9.8	693000	17.95	8.04	92.1	19.77	9	LLGVSADDVQSHNEWIK	1	1	17.95	8.04	637.665	1910.96	0.0187	(K)	LLGVSADDVQSHNEWIK	(D)	Sesamum indicum	Sesamum indicum	XP_011100693.1	XP_011100693.1	2	13.1	51.02	1-Cys peroxiredoxin
1	2	606.33	0.0108	8.9	803000	15.16	12.14	87.4	20.3	11	LSFLYPASTGR	2	3	18.12	15.39	606.329	1211.64	0.0091	(K)	LSFLYPASTGR	(N)	Sesamum indicum	Sesamum indicum	XP_011100693.1	XP_011100693.1	3	13.1	51.02	1-Cys peroxiredoxin
1	2	522.804	0.0082	7.9	691000	14.36	8.62	86.8	13.72	10	DGVVVVTVEK	1	1	14.36	8.62	522.804	1044.59	0.0082	(R)	DGVVVVTVEK	(L)	Sesamum indicum	Sesamum indicum	XP_011081635.1	XP_011081635.1	1	14.1	45.24	18.8 kDa class II heat shock protein
1	2	917.947	0.0124	6.8	695000	18.29	9.54	83.7	18.9	9	FALPENANTEAISAACR	1	1	18.29	9.54	917.947	1834.88	0.0124	(K)	FALPENANTEAISAACR	(D)	Sesamum indicum	Sesamum indicum	XP_011081635.1	XP_011081635.1	2	14.1	45.24	18.8 kDa class II heat shock protein
2	4	905.436	0.0194	5.4	4070000	12.59	11.2	69.2	40.58	14	NFGLDNSLLSTLQDMLDFAEDHEKPTQNNPSK	1	2	12.59	11.2	905.436	3618.7	0.0194	(R)	NFGLDNSLLSTLQDMLDFAEDHEKPTQNNPSK	(A)	Sesamum indicum	Sesamum indicum	XP_011081635.1	XP_011081635.1	3	14.1	45.24	18.8 kDa class II heat shock protein
1	2	739.398	0.0095	6.4	738000	21.16	21.16	87.2	25.52	11	VFFDITIGGQPAGR	1	1	21.16	21.16	739.398	1477.78	0.0095	(R)	VFFDITIGGQPAGR	(V)	Sesamum indicum	Sesamum indicum	XP_011074689.1	XP_011074689.1	1	15.1	40.47	peptidyl-prolyl cis-trans isomerase
1	2	689.862	0.0124	9	572000	19.31	20.56	92.7	22.98	11	VVMELFADTTPR	2	3	19.31	20.56	689.862	1378.7	0.0124	(R)	VVMELFADTTPR	(T)	Sesamum indicum	Sesamum indicum	XP_011074689.1	XP_011074689.1	2	15.1	40.47	peptidyl-prolyl cis-trans isomerase
1	2	730.409	0.0102	7	610000	17.76	16.26	86.8	18.93	10	AIGETIVEIGQTTK	2	2	21.31	19.19	730.408	1459.8	0.0084	(R)	AIGETIVEIGQTTK	(D)	Sesamum indicum	Sesamum indicum	XP_011098036.1	XP_011098036.1	1	16.1	40.47	embryonic protein DC-8-like
1	2	636.339	0.0115	9	779000	15.99	17.52	78.8	19.13	9	GGPSLEEISNLR	2	2	19.16	19.59	636.338	1271.66	0.009	(K)	GGPSLEEISNLR	(S)	Sesamum indicum	Sesamum indicum	XP_011098036.1	XP_011098036.1	2	16.1	40.47	embryonic protein DC-8-like
2	2	736.874	0.0133	9	5180000	19.66	16.36	89.7	9.2	7	CQAVQQVVQQER	2	3	19.66	16.36	736.874	1472.73	0.0133	(R)	CQAVQQVVQQER	(Q)	Sesamum indicum	Sesamum indicum	CAC84134.1	XP_011099732.1|CAC84134.1	1	17.1	39.41	precursor of thiamin-binding protein
2	2	1002.5	0.0123	6.2	30700000	19.75	15.3	100	24.92	10	ELQEMLQTAQSLPSLCR	2	4	19.75	15.3	1002.5	2003.99	0.0123	(R)	ELQEMLQTAQSLPSLCR	(I)	Sesamum indicum	Sesamum indicum	CAC84134.1	XP_011099732.1|CAC84134.1	2	17.1	39.41	precursor of thiamin-binding protein
1	2	696.27	0.0118	8.5	28200000	14.98	14.98	82.2	11.18	12	MCGMSYPTECR	1	1	14.98	14.98	696.27	1391.52	0.0118	(R)	MCGMSYPTECR	(M)	Sesamum indicum	UNREADABLE|Sesamum indicum	AAD42943.1	sp|Q9XHP1.1|2SS1_SESIN|XP_011095387.1|AAD42943.1	1	18.1	38.31	2S albumin precursor
3	2	1547.66	0.0088	2.8	29900000	21.21	21.19	92.6	34.13	4	QMQQEYGMEQEMQQMQQMMQYLPR	2	10	23.33	22.25	1032.11	3094.3	0.0063	(R)	QMQQEYGMEQEMQQMQQMMQYLPR	(M)	Sesamum indicum	UNREADABLE|Sesamum indicum	AAD42943.1	sp|Q9XHP1.1|2SS1_SESIN|XP_011095387.1|AAD42943.1	2	18.1	38.31	2S albumin precursor
1	2	494.782	0.008	8	884000	17.18	7.5	90.3	16.68	10	GLALQMVEK	1	1	17.18	7.5	494.782	988.55	0.008	(R)	GLALQMVEK	(G)	Sesamum indicum	Sesamum indicum	ACB55491.1	NP_001291332.1|ACB55491.1	1	19.1	34.55	seed maturation-like protein precursor
1	2	601.336	0.0107	8.9	2630000	17.37	12.46	92.7	13.28	9	VALVTGGDSGIGR	1	1	17.37	12.46	601.336	1201.65	0.0107	(K)	VALVTGGDSGIGR	(A)	Sesamum indicum	Sesamum indicum	ACB55491.1	NP_001291332.1|XP_011090772.1|ACB55491.1	2	19.1	34.55	seed maturation-like protein precursor
2	2	652.359	0.0098	7.5	1900000	16.92	12.95	81.2	14.7	10	ATATIQGFGPVNK	2	4	18.47	15.61	652.357	1303.7	0.0073	(K)	ATATIQGFGPVNK	(I)	Sesamum indicum	Sesamum indicum	XP_011084154.1	XP_011084154.1	1	20.1	32.49	oil body-associated protein 1A
1	2	777.933	0.0121	7.8	935000	14.02	11.49	83.2	26.28	10	SGVLFMPGVPGPIQR	2	2	14.02	11.49	777.933	1554.85	0.0121	(K)	SGVLFMPGVPGPIQR	(Q)	Sesamum indicum	Sesamum indicum	XP_011084154.1	XP_011084154.1	2	20.1	32.49	oil body-associated protein 1A
1	2	647.838	0.0108	8.3	715000	9.74	9.74	64.1	28.95	9	EPVFSFWLNR	2	2	13.73	14.3	647.838	1294.66	0.0109	(K)	EPVFSFWLNR	(N)	Sesamum indicum	Sesamum indicum	XP_011096039.2	XP_011096039.2|XP_011086197.1|XP_011086196.1	1	21.1	31.76	aspartic proteinase-like
1	3	768.033	0.021	9.1	878000	17.7	13.29	80.8	21.65	10	NVEEEEGGELVFGGVDPNHFK	2	2	18.03	12.86	768.031	2302.06	0.0174	(R)	NVEEEEGGELVFGGVDPNHFK	(G)	Sesamum indicum	Sesamum indicum	XP_011096039.2	XP_011096039.2	2	21.1	31.76	aspartic proteinase-like
1	2	586.302	0.0108	9.2	1100000	15.26	14.2	75.2	3.77	9	AEQFGQQHVK	1	1	15.26	14.2	586.302	1171.59	0.0108	(R)	AEQFGQQHVK	(G)	Sesamum indicum	Sesamum indicum	XP_011081346.1	XP_011081346.1	1	22.1	31.05	oleosin 1-like
2	2	481.269	0.0096	10	1540000	15.79	13.52	81.7	1.53	8	LAHAAHDVK	1	2	15.79	13.52	481.269	961.521	0.0096	(K)	LAHAAHDVK	(E)	Sesamum indicum	Sesamum indicum	XP_011081346.1	XP_011081346.1	2	22.1	31.05	oleosin 1-like
1	2	640.336	0.0122	9.6	7800000	21.15	16.28	95.6	11.65	11	GVQEGTLYVGEK	2	2	21.15	16.28	640.336	1279.65	0.0122	(R)	GVQEGTLYVGEK	(T)	Sesamum indicum	Sesamum indicum	AAG23840.1	NP_001292915.1|AAG23840.1	1	23.1	28.23	oleosin
1	2	718.386	0.0108	7.5	521000	7.08	6.75	58.6	9.38	9	RGVQEGTLYVGEK	1	1	7.08	6.75	718.386	1435.75	0.0108	(K)	RGVQEGTLYVGEK	(T)	Sesamum indicum	Sesamum indicum	AAG23840.1	NP_001292915.1|AAG23840.1	2	23.1	28.23	oleosin
1	2	555.798	0.0107	9.6	514000	12.96	9.93	76.8	13	14	AELAVPEPER	1	1	12.96	9.93	555.798	1110.58	0.0107	(R)	AELAVPEPER	(I)	Sesamum indicum	Sesamum indicum	XP_011102222.1	XP_011102222.1	1	24.1	26.68	oil body-associated protein 2A-like
1	2	657.39	0.0111	8.4	665000	13.72	17.89	73.6	14.97	9	GAQMLQSLKPIK	2	3	13.72	17.89	657.39	1313.76	0.0111	(K)	GAQMLQSLKPIK	(H)	Sesamum indicum	Sesamum indicum	XP_011102222.1	XP_011102222.1	2	24.1	26.68	oil body-associated protein 2A-like
2	2	584.783	0.0099	8.5	569000	9.67	6.73	73.5	9.68	8	DQTGSYLDAAK	1	2	9.67	6.73	584.783	1168.55	0.0099	(K)	DQTGSYLDAAK	(E)	Sesamum indicum	Sesamum indicum	XP_011072248.1	XP_011072248.1	1	25.1	24.79	late embryogenesis abundant protein Dc3
2	2	516.765	0.0091	8.8	721000	15.12	15.12	77.4	6.28	10	GMAQGAAEAVK	1	2	15.12	15.12	516.765	1032.51	0.0091	(K)	GMAQGAAEAVK	(H)	Sesamum indicum	Sesamum indicum	XP_011072248.1	XP_011072248.1	2	25.1	24.79	late embryogenesis abundant protein Dc3
1	2	524.772	0.0101	9.6	568000	15.39	15.39	83.2	3.4	7	ETASNVAASAK	2	3	16.28	16.28	524.772	1048.53	0.0102	(K)	ETASNVAASAK	(A)	Sesamum indicum	Sesamum indicum	XP_011078825.1	XP_011078825.1	1	26.1	24.33	11 kDa late embryogenesis abundant protein-like
1	2	440.698	0.0088	9.9	290000	8.05	8.05	68.1	2.38	6	TGHGTGSTY	1	1	8.05	8.05	440.698	880.38	0.0088	(R)	TGHGTGSTY	(-)	Sesamum indicum	Sesamum indicum	XP_011078825.1	XP_011078825.1	2	26.1	24.33	11 kDa late embryogenesis abundant protein-like
1	2	537.303	0.0102	9.5	1030000	18.97	13.83	90.6	23.25	10	AFGPALVGWR	2	2	21.9	15.44	537.303	1073.59	0.0096	(R)	AFGPALVGWR	(W)	Sesamum indicum	Sesamum indicum	XP_011072095.1	XP_011072095.1	1	27.1	21.9	probable aquaporin TIP3-2
2	2	1135.02	0.0134	5.9	25600000	20.75	20.75	93.1	7.02	10	QQQQEGGYQEGQSQQVYQR	2	4	20.85	20.85	1135.02	2269.02	0.0101	(R)	QQQQEGGYQEGQSQQVYQR	(A)	Sesamum indicum	Sesamum indicum	AAK15088.1	XP_011094336.1|ACI41245.1|ACI41244.1|AAK15088.1	1	28.1	20.85	2S albumin
1	2	747.407	0.0105	7	1060000	20.58	17.4	90.2	17.35	9	ALVSTEYGQISAVR	2	2	20.58	17.4	747.407	1493.8	0.0105	(R)	ALVSTEYGQISAVR	(V)	Sesamum indicum	Sesamum indicum	XP_020554796.1	XP_020554796.1	1	29.1	20.58	vicilin-like seed storage protein At2g18540
1	2	645.33	0.0076	5.9	524000	19.83	12.1	87.6	8.55	9	SLAGSLQSQQDR	1	1	19.83	12.1	645.33	1289.64	0.0076	(R)	SLAGSLQSQQDR	(Q)	Sesamum indicum	Sesamum indicum	XP_011098616.1	XP_011098616.1	1	30.1	19.83	non-specific lipid-transfer protein AP10
1	2	585.34	0.0096	8.2	636000	16.81	9.85	91.6	21.93	10	DAGAIAGLNVLR	1	1	16.81	9.85	585.34	1169.66	0.0096	(K)	DAGAIAGLNVLR	(I)	Sesamum indicum	Sesamum indicum	XP_011079384.1	XP_011079384.1	1	31.1	16.81	heat shock 70 kDa protein
2	2	536.23	0.0103	9.6	8340000	15.43	12.28	77.4	7.82	10	YCCGVMGPK	1	2	15.43	12.28	536.23	1071.44	0.0103	(R)	YCCGVMGPK	(G)	Sesamum indicum	Sesamum indicum	XP_011099997.1	XP_011099997.1	1	32.1	15.43	uncharacterized protein LOC105178254
2	2	749.933	0.0111	7.4	2310000	13.32	13.32	76.5	25.02	10	VPTVDVSVVDLTVR	2	4	13.93	13.93	749.932	1498.85	0.0093	(R)	VPTVDVSVVDLTVR	(L)	Sesamum indicum	Sesamum indicum	AFJ42572.1	NP_001291329.1|XP_011086733.1|XP_011073006.1|AFJ42572.1	1	33.1	13.93	glyceraldehyde 3-phosphate dehydrogenase
1	2	547.285	0.0103	9.4	786000	11.94	12.61	72.5	10.22	12	QATGPLDYTK	2	2	13.74	11.94	547.285	1093.55	0.0103	(R)	QATGPLDYTK	(R)	Sesamum indicum	Sesamum indicum	XP_011097414.1	XP_011097414.1	1	34.1	13.74	oleosin 16.4 kDa
2	2	782.871	0.0106	6.8	1620000	13.36	13.36	81.6	9.5	8	AEQFSQQPVAGSQTS	2	4	13.36	13.36	782.871	1564.72	0.0106	(R)	AEQFSQQPVAGSQTS	(-)	Sesamum indicum	Sesamum indicum	AAD42942.1	XP_011076526.1|AAD42942.1|ACH85188.1|ACH85187.1	1	35.1	13.36	15 kDa oleosin
1	2	490.214	0.0052	5.4	6710000	11.88	3.84	60.7	3.3	2	DCTADEIR	1	1	11.88	3.84	490.214	979.415	0.0052	(R)	DCTADEIR	(S)	Sesamum indicum	Sesamum indicum	XP_011087346.1	XP_011087346.1	1	36.1	11.88	DNAJ protein JJJ1 homolog
1	2	427.24	-0.0048	-5.6	246000	9.7	3.18	46.9	6.25	9	GGIGVPPEK	1	1	9.7	3.18	427.24	853.478	-0.0048	(R)	GGIGVPPEK	(S)	Sesamum indicum	Sesamum indicum	XP_011080223.1	XP_011080223.1|XP_011087003.1|XP_011086997.1|XP_011086981.1	1	37.1	9.7	callose synthase 3
1	2	642.837	0.0013	1	491000	8.82	4.58	79.1	10.2	9	VVPKDFFSSMK	1	1	8.82	4.58	642.837	1284.67	0.0013	(K)	VVPKDFFSSMK	(D)	Sesamum indicum	Sesamum indicum	XP_011080509.1	XP_011080511.1|XP_011080510.1|XP_011080509.1	1	38.1	8.82	uncharacterized protein LOC105163756
1	3	717.371	0.0208	9.7	42800000	8.36	2.01	66.5	31.62	13	DDMFWRPVMTKPEIEKK	1	1	8.36	2.01	717.371	2150.08	0.0208	(K)	DDMFWRPVMTKPEIEKK	(V)	Sesamum indicum	Sesamum indicum	XP_011100500.1	XP_011100500.1	1	39.1	8.36	DExH-box ATP-dependent RNA helicase DExH6
1	2	480.238	0.0028	3	8920000	8.35	-4.24	36.6	5.57	9	FTEMYIR	1	1	8.35	-4.24	480.238	959.466	0.0028	(K)	FTEMYIR	(T)	Sesamum indicum	Sesamum indicum	XP_011094001.1	XP_011094001.1	1	40.1	8.35	1-aminocyclopropane-1-carboxylate synthase 7
1	2	514.797	0.0017	1.6	19100000	8.21	5.88	59	9.4	10	ITSSKLHSR	2	2	8.21	5.88	514.797	1028.58	0.0017	(R)	ITSSKLHSR	(A)	Sesamum indicum	Sesamum indicum	XP_020547941.1	XP_020547941.1	1	41.1	8.21	small subunit processome component 20 homolog
1	3	369.524	0.0082	7.4	1140000	7.92	5.6	57.7	11.63	11	SNWRGSFPR	1	1	7.92	5.6	369.524	1106.55	0.0082	(K)	SNWRGSFPR	(D)	Sesamum indicum	Sesamum indicum	XP_011085186.1	XP_011085189.1|XP_011085188.1|XP_011085186.1	1	42.1	7.92	small RNA 2'-O-methyltransferase isoform X1
1	4	474.507	0.0133	7	1680000	7.87	1.45	76.7	9.77	11	SLKDTTLFGFSLSDHVK	1	1	7.87	1.45	474.507	1894.99	0.0133	(-)	SLKDTTLFGFSLSDHVK	(A)	Sesamum indicum	Sesamum indicum	XP_011069391.1	XP_011069391.1	1	43.1	7.87	protochlorophyllide reductase-like, partial
1	4	593.054	0.0182	7.7	842000	7.8	4.3	64.7	21.07	10	GGGIGGGFGKGGGVGGGYGKGGGFGGGVGK	1	1	7.8	4.3	593.054	2369.17	0.0182	(K)	GGGIGGGFGKGGGVGGGYGKGGGFGGGVGK	(G)	Sesamum indicum	Sesamum indicum	XP_020553119.1	XP_020553119.1	1	44.1	7.8	glycine-rich cell wall structural protein
1	2	357.218	-0.0054	-7.5	544000	7.79	5.32	51.4	11.68	10	WILPGK	1	1	7.79	5.32	357.218	713.434	-0.0054	(R)	WILPGK	(G)	Sesamum indicum	Sesamum indicum	XP_011100144.1	XP_011100144.1	1	45.1	7.79	alkane hydroxylase MAH1-like
1	2	584.304	0.0013	1.2	1010000	7.56	0	69.2	14.3	12	SLGEFKSSQGK	1	1	7.56	0	584.304	1167.6	0.0013	(R)	SLGEFKSSQGK	(L)	Sesamum indicum	Sesamum indicum	XP_011095122.1	XP_011095122.1	1	46.1	7.56	uncharacterized protein LOC105174650
1	3	503.919	-0.0097	-6.4	1580000	7.45	7.45	43.5	24.65	12	EPGCSWIKYKNK	1	1	7.45	7.45	503.919	1509.75	-0.0097	(K)	EPGCSWIKYKNK	(V)	Sesamum indicum	Sesamum indicum	XP_011077894.1	XP_011077894.1	1	47.1	7.45	putative pentatricopeptide repeat-containing protein At1g68930
2	2	530.313	0.0097	9.2	2810000	7.41	7.41	61.4	9.33	10	APFGVLTIEI	2	3	7.41	7.41	530.313	1059.61	0.0097	(R)	APFGVLTIEI	(-)	Sesamum indicum	Sesamum indicum	XP_011082361.1	XP_011082361.1	1	48.1	7.41	uncharacterized protein LOC105165155
1	2	630.275	-0.0062	-4.9	7810000	7.25	4.68	59.7	14.08	10	GLDPNESDNNGK	2	2	7.25	4.68	630.275	1259.55	-0.0062	(R)	GLDPNESDNNGK	(T)	Sesamum indicum	Sesamum indicum	XP_011093723.1	XP_020553456.1|XP_011093723.1	1	49.1	7.25	potassium channel AKT1-like isoform X1
1	3	599.679	0.0008	0.4	1550000	7.08	0.9	53.4	22.67	14	IDAARALIEKGIDVNAK	1	1	7.08	0.9	599.679	1797.02	0.0008	(R)	IDAARALIEKGIDVNAK	(D)	Sesamum indicum	Sesamum indicum	XP_011077910.1	XP_011077910.1	1	50.1	7.08	uncharacterized protein LOC105161794
1	3	546.941	-0.0042	-2.6	4710000	6.73	3.45	55.6	6.25	14	WYYRPEEAVGGRR	1	1	6.73	3.45	546.941	1638.81	-0.0042	(R)	WYYRPEEAVGGRR	(Q)	Sesamum indicum	Sesamum indicum	XP_011086206.1	XP_011086206.1	1	51.1	6.73	chromatin remodeling protein EBS
1	2	893.015	-0.0069	-3.8	5770000	6.39	4.57	43.5	28.63	27	LTISDCRPLLLKIDK	1	1	6.39	4.57	893.015	1785.03	-0.0069	(R)	LTISDCRPLLLKIDK	(R)	Sesamum indicum	Sesamum indicum	XP_011100858.1	XP_011100858.1	1	52.1	6.39	uncharacterized protein LOC105178970
2	4	769.605	0.0148	4.8	94800000	6.23	3.38	47.5	21.77	12	LDLDAKTCDYSEVQIAGDDFSSGNLEGR	1	2	6.23	3.38	769.605	3075.38	0.0148	(K)	LDLDAKTCDYSEVQIAGDDFSSGNLEGR	(G)	Sesamum indicum	Sesamum indicum	XP_011069625.1	XP_011069625.1	1	53.1	6.23	probable serine/threonine-protein kinase PIX7
1	2	362.714	0.0002	0.2	11900000	6.21	2.69	59.5	2.58	7	VHARNK	1	1	6.21	2.69	362.714	724.421	0.0002	(K)	VHARNK	(Y)	Sesamum indicum	Sesamum indicum	XP_011099752.1	XP_011099752.1	1	54.1	6.21	probable inactive ATP-dependent zinc metalloprotease FTSHI 4, chloroplastic isoform X1
1	4	565.038	-0.0088	-3.9	2100000	6.16	1.2	58.1	17.48	12	DAVDNLCSNTRTKYLAFLR	1	1	6.16	1.2	565.038	2257.14	-0.0088	(K)	DAVDNLCSNTRTKYLAFLR	(L)	Sesamum indicum	Sesamum indicum	XP_011096788.1	XP_011096788.1	1	55.1	6.16	exocyst complex component EXO84C
2	3	689.668	-0.0178	-8.6	45800000	6.09	2.48	53.9	12.92	11	DLELKGYGEQGVETELMR	1	2	6.09	2.48	689.668	2067.01	-0.0178	(K)	DLELKGYGEQGVETELMR	(M)	Sesamum indicum	Sesamum indicum	XP_011089452.1	XP_011089452.1	1	56.1	6.09	uncharacterized protein LOC105170399
1	4	620.047	-0.0087	-3.5	1460000	5.97	1.97	53.6	21.52	11	GNINQGIDTTPSTSNGDSSSLLNGK	1	1	5.97	1.97	620.047	2477.18	-0.0087	(R)	GNINQGIDTTPSTSNGDSSSLLNGK	(D)	Sesamum indicum	Sesamum indicum	XP_011091532.1	XP_011091532.1	1	57.1	5.97	uncharacterized protein LOC105171950
1	2	478.766	0.0091	9.5	593000	5.94	0.54	53.5	8	9	IDPQTLNR	1	1	5.94	0.54	478.766	956.516	0.0091	(R)	IDPQTLNR	(I)	Sesamum indicum	Sesamum indicum	XP_011098339.2	XP_011098339.2|XP_011098340.1	1	58.1	5.94	beta-glucosidase 18
1	4	582.047	0.0118	5.1	1450000	5.73	3.88	47	21.12	11	SSQSPSPSHSASASATSSIHKRK	1	1	5.73	3.88	582.047	2325.15	0.0118	(R)	SSQSPSPSHSASASATSSIHKRK	(L)	Sesamum indicum	Sesamum indicum	XP_011082596.1	XP_011082596.1	1	59.1	5.73	histone acetyltransferase GCN5
1	4	1113.29	0.0154	3.5	8300000	5.72	6.78	54.3	30.97	12	ARGWLNWLSYGMLGAGGTDDSNQFSGVISDDVIKDIYEATK	1	1	5.72	6.78	1113.29	4450.13	0.0154	(K)	ARGWLNWLSYGMLGAGGTDDSNQFSGVISDDVIKDIYEATK	(F)	Sesamum indicum	Sesamum indicum	XP_011075730.1	XP_020549112.1|XP_011075730.1	1	60.1	5.72	uncharacterized protein LOC105160162 isoform X1
1	2	618.363	0.0116	9.4	1340000	5.53	5.32	59.1	23.75	21	NRRGAAAIPGPR	1	1	5.53	5.32	618.363	1235.71	0.0116	(R)	NRRGAAAIPGPR	(G)	Sesamum indicum	Sesamum indicum	XP_011090628.1	XP_011090628.1	1	61.1	5.53	LOW QUALITY PROTEIN: cytochrome P450 78A7-like
1	2	429.743	-0.0055	-6.4	544000	5.48	5.48	48.8	9.87	10	STPVIWR	1	1	5.48	5.48	429.743	858.483	-0.0055	(K)	STPVIWR	(V)	Sesamum indicum	Sesamum indicum	XP_011095041.1	XP_011095041.1	1	62.1	5.48	dnaJ protein ERDJ3A
1	4	474.507	0.0021	1.1	1680000	5.34	2.79	64.2	9.77	11	VTKAVVTVPAYFNDSQR	1	1	5.34	2.79	474.507	1895	0.0021	(K)	VTKAVVTVPAYFNDSQR	(T)	Sesamum indicum	Sesamum indicum	XP_011087666.1	XP_011092298.1|XP_011087666.1	1	63.1	5.34	stromal 70 kDa heat shock-related protein, chloroplastic-like
1	4	1161.59	-0.0296	-6.4	122000	5.18	0.54	33.5	34.47	0	DLLQELNENLPGATFVHANVYDLVMELITNYAKYGFITASR	1	1	5.18	0.54	1161.59	4643.35	-0.0296	(K)	DLLQELNENLPGATFVHANVYDLVMELITNYAKYGFITASR	(A)	Sesamum indicum	Sesamum indicum	XP_011085659.2	XP_011085659.2	1	64.1	5.18	GDSL esterase/lipase At2g23540
1	3	538.313	-0.001	-0.6	16200000	5.07	1.95	33.9	22.15	14	VQAEALKLSPGSSVVK	1	1	5.07	1.95	538.313	1612.93	-0.001	(R)	VQAEALKLSPGSSVVK	(S)	Sesamum indicum	Sesamum indicum	XP_011072681.1	XP_011072681.1	1	65.1	5.07	subtilisin-like protease SBT1.5
1	4	571.565	-0.0214	-9.4	1600000	5.04	0.89	46.8	26.68	12	ILTTRQAAKGLLAFGEYFQR	1	1	5.04	0.89	571.565	2283.26	-0.0214	(R)	ILTTRQAAKGLLAFGEYFQR	(L)	Sesamum indicum	Sesamum indicum	XP_011097893.1	XP_011097907.1|XP_011097899.1|XP_011097893.1	1	66.1	5.04	transcription factor TGA4 isoform X1
1	5	402.613	-0.0063	-3.1	1710000	4.64	4.64	51.1	5.97	9	RPDSPENDVVVIGSAIANR	1	1	4.64	4.64	402.613	2009.04	-0.0063	(R)	RPDSPENDVVVIGSAIANR	(R)	Sesamum indicum	Sesamum indicum	XP_011081217.1	XP_011081217.1	1	67.1	4.64	oxysterol-binding protein-related protein 2A
1	4	761.919	0.009	2.9	1900000	4.5	2.68	51.3	29.58	10	KLALEGVEISLDCANLLNNSLDVFLKR	1	1	4.5	2.68	761.919	3044.64	0.009	(K)	KLALEGVEISLDCANLLNNSLDVFLKR	(L)	Sesamum indicum	Sesamum indicum	XP_011088051.1	XP_020551270.1|XP_011088053.1|XP_011088051.1	1	68.1	4.5	uncharacterized protein LOC105169363
1	4	582.293	0.0025	1.1	949000	4.39	4.39	34.5	23.05	10	GLDLEGHWGRVDYDAVIPADK	1	1	4.39	4.39	582.293	2326.15	0.0025	(R)	GLDLEGHWGRVDYDAVIPADK	(I)	Sesamum indicum	Sesamum indicum	XP_011093880.1	XP_011093880.1	1	69.1	4.39	UV-stimulated scaffold protein A homolog
1	4	940.208	0.0176	4.7	1760000	4.23	2.15	37.4	34.22	12	KNYQAVQGGKIGVTNMSGWFDPYSDAPADIEAATR	1	1	4.23	2.15	940.208	3757.79	0.0176	(R)	KNYQAVQGGKIGVTNMSGWFDPYSDAPADIEAATR	(A)	Sesamum indicum	Sesamum indicum	XP_011094151.1	XP_011094151.1	1	70.1	4.23	beta-glucosidase isoform X1
1	5	663.729	-0.0149	-4.5	2620000	4.05	2.2	60.5	25.85	12	SGVPHHLLGVVDPESDFSAANFRTMASITMK	1	1	4.05	2.2	663.729	3314.63	-0.0149	(R)	SGVPHHLLGVVDPESDFSAANFRTMASITMK	(S)	Sesamum indicum	Sesamum indicum	XP_011079824.1	XP_011079824.1	1	71.1	4.05	adenylate isopentenyltransferase 3, chloroplastic

[truncated: 1 more sheets: Sunflower oil]
